# Supplementary material for: Targeted genotyping of variable number tandem repeats with adVNTR
Source: HighWire-hosted journal article supplement (doi:10.1101/gr.235119.118), 2018-10-23
Supplement: Supplemental_Table_S7.docx [file Supplemental_Table_S7.docx]

| VNTR ID | Repeating Pattern | Position (hg19) | Identical Patterns | Tested using Illumina data | Tested using PacBio data | Tested for frameshift identification | Frameshift testcases | adVNTR correct indel predictions | adVNTR wrong indel predictions | GATK correct indel predictions | GATK wrong indel predictions |
| --- | --- | --- | --- | --- | --- | --- | --- | --- | --- | --- | --- |
| 221 | CCTCCCCAGCCACGGTGAGGACCCACCCTGGCATGATCTCCCCTCATCA | chr1:874778-874927 | 0 | 0 | 1 | 0 | 0 | - | - | - | - |
| 237 | GTCCGCAGTGGGGCTGTGGGAGGGGGCCGCGC | chr1:899910-900238 | 0 | 0 | 1 | 0 | 0 | - | - | - | - |
| 255 | TGTCAGGTTGCGGCTCGGAGGCAGGTGTAGACACAGCCATGTCCC | chr1:915298-915523 | 0 | 0 | 1 | 0 | 0 | - | - | - | - |
| 287 | GCTCCGGCCAGTGCCAGGGTCGAGGTGGGCGGCTCCCCCGGGGGAGG | chr1:977058-977246 | 0 | 0 | 1 | 0 | 0 | - | - | - | - |
| 393 | GCTGCTGTGCAGGTGGAGAGAGGCT | chr1:1111111-1111482 | 0 | 0 | 1 | 0 | 0 | - | - | - | - |
| 473 | TCCCGTGTCTCTGCTCCG | chr1:1223579-1225674 | 0 | 0 | 1 | 0 | 0 | - | - | - | - |
| 476 | GCTCCAGCCCAACCCCCACCCCCAGCCTGGCCCTCAGGGGCCCACCTGTGGAT | chr1:1231706-1231812 | 0 | 1 | 1 | 0 | 0 | - | - | - | - |
| 478 | GGGGCAGGGGCCATCCCCGGTGGCACGTGTGTGTGTGCACAGGCGC | chr1:1232456-1233222 | 0 | 0 | 1 | 0 | 0 | - | - | - | - |
| 487 | GGGCGGCTCTGGGTCACAGGTACGGAGGATGACGGCTGTGCTGGTGGGTCAC | chr1:1246148-1246302 | 0 | 0 | 1 | 0 | 0 | - | - | - | - |
| 508 | GCCCCCACAGACCCACCCGCAGCCGCATGTCACCCCAGCA | chr1:1275245-1275440 | 0 | 0 | 1 | 0 | 0 | - | - | - | - |
| 520 | CCCCGACCCCGCGG | chr1:1290766-1290834 | 0 | 1 | 1 | 0 | 0 | - | - | - | - |
| 526 | ACACATGGAGACACACAGAGATACACACGCATGCACACGAAG | chr1:1296259-1296635 | 0 | 0 | 1 | 0 | 0 | - | - | - | - |
| 567 | CCCACCCAGCGCTGGGACCCCCATCCTACCCCACCCAGAGAAGGGACCCCTCCA | chr1:1356049-1356219 | 0 | 0 | 1 | 0 | 0 | - | - | - | - |
| 669 | GGGCGGCCGCGGCGCA | chr1:1535328-1535438 | 0 | 1 | 1 | 0 | 0 | - | - | - | - |
| 682 | CCCTCTGCCCACAGGTCCCGAGCAGCCCCGCCCAACATGGAC | chr1:1558754-1558838 | 0 | 1 | 1 | 0 | 0 | - | - | - | - |
| 683 | CCTGGGGTGAGGCCTGGGAGGGGCCCGGCCGGCGGGGCTGAGCCTGTGCGT | chr1:1562818-1563016 | 0 | 0 | 1 | 0 | 0 | - | - | - | - |
| 685 | CCTGCCCGTGAGTGCTGCTCCCTGGCCTGGGTGCCC | chr1:1563202-1563347 | 0 | 0 | 1 | 0 | 0 | - | - | - | - |
| 764 | AGCGGCAGG | chr1:1850627-1850691 | 0 | 1 | 1 | 0 | 0 | - | - | - | - |
| 767 | CGCCCACCCCCCCAGCTCAC | chr1:1855535-1855840 | 0 | 0 | 1 | 0 | 0 | - | - | - | - |
| 1079 | CGGGGCGCGGGGGAGC | chr1:2461221-2461285 | 0 | 1 | 1 | 0 | 0 | - | - | - | - |
| 1097 | GAGCCAGGAGCGGG | chr1:2518236-2518334 | 0 | 1 | 1 | 0 | 0 | - | - | - | - |
| 1540 | CCCGGCTCTGTCCCCCCCAGTCCCTCCCACTGATCTCCGCCT | chr1:3394377-3394460 | 0 | 1 | 1 | 0 | 0 | - | - | - | - |
| 1619 | GGCGGCCGCGGGCGGGG | chr1:3541720-3541753 | 0 | 1 | 1 | 0 | 0 | - | - | - | - |
| 1713 | TTTACACACCCCGATTC | chr1:3743211-3743279 | 0 | 1 | 1 | 0 | 0 | - | - | - | - |
| 2551 | ACCTACCATGAGTGGCCACAGGAA | chr1:6194594-6194795 | 0 | 0 | 1 | 0 | 0 | - | - | - | - |
| 3055 | CGAATGGTGGTGGTGAGTCAG | chr1:7870615-7870657 | 1 | 1 | 1 | 0 | 0 | - | - | - | - |
| 3056 | CTGTCCACGGGATCGCCTCCCAGGAAGAATCCATCCCATCCTACTGCCAGCGCT | chr1:7889947-7890218 | 0 | 0 | 1 | 0 | 0 | - | - | - | - |
| 3199 | CTCCCGCTCTCGGAT | chr1:8418640-8418700 | 0 | 1 | 1 | 0 | 0 | - | - | - | - |
| 3200 | CCCGCTCTGCGCTCCCGCT | chr1:8419828-8419943 | 0 | 1 | 1 | 0 | 0 | - | - | - | - |
| 3202 | GGGATGCGGCGA | chr1:8421094-8421157 | 0 | 1 | 1 | 0 | 0 | - | - | - | - |
| 3275 | TCTCGGTCCCGG | chr1:8716291-8716315 | 1 | 1 | 1 | 0 | 0 | - | - | - | - |
| 3276 | TCTTTG | chr1:8716321-8716345 | 1 | 1 | 1 | 0 | 0 | - | - | - | - |
| 3344 | GCCCACCTTGT | chr1:9085006-9085039 | 1 | 1 | 1 | 0 | 0 | - | - | - | - |
| 3603 | TTCCTC | chr1:9790706-9790757 | 0 | 1 | 1 | 0 | 0 | - | - | - | - |
| 3797 | GTCCTCGTCGTCGTC | chr1:10699136-10699305 | 0 | 0 | 1 | 0 | 0 | - | - | - | - |
| 3801 | GGGCTCTCACCTGGGAGG | chr1:10703189-10703224 | 0 | 1 | 1 | 0 | 0 | - | - | - | - |
| 3930 | CGGATGGCGGCGGGGC | chr1:11119950-11120053 | 0 | 1 | 1 | 0 | 0 | - | - | - | - |
| 3936 | AAGCCCACCCCACTCTAGAAACACTCTGCACAAGGGGGAGAGCCTCTGCAACCTCCCACGGGATGCACCCACCGACTG | chr1:11172681-11172914 | 0 | 0 | 1 | 0 | 0 | - | - | - | - |
| 3939 | GGCAGTGGTGGC | chr1:11190672-11190741 | 0 | 1 | 1 | 0 | 0 | - | - | - | - |
| 4098 | GTGCTGCTGCTGCAGGTG | chr1:11866342-11866377 | 0 | 1 | 1 | 0 | 0 | - | - | - | - |
| 4605 | GGAAGAGGAGGAGGA | chr1:14105090-14105177 | 0 | 1 | 1 | 0 | 0 | - | - | - | - |
| 4878 | AGGAGGAGATGAAGAAGCAGAGC | chr1:15755119-15755186 | 0 | 1 | 1 | 0 | 0 | - | - | - | - |
| 4931 | GGCGGCGGCGGT | chr1:16010997-16011070 | 0 | 1 | 1 | 0 | 0 | - | - | - | - |
| 4991 | CAGTCAATGCCACAGCAAGTG | chr1:16260905-16261033 | 0 | 1 | 1 | 0 | 0 | - | - | - | - |
| 4992 | CCCCTGCCCCCGTCCCTG | chr1:16262471-16262525 | 0 | 1 | 1 | 0 | 0 | - | - | - | - |
| 4994 | CTCCTCTTG | chr1:16271632-16271668 | 0 | 1 | 1 | 0 | 0 | - | - | - | - |
| 5013 | GAGGAGGAGGAA | chr1:16344375-16344411 | 0 | 1 | 1 | 0 | 0 | - | - | - | - |
| 5459 | CCGCCGCCA | chr1:18434565-18434648 | 0 | 1 | 1 | 0 | 0 | - | - | - | - |
| 5686 | CTTCTTCTTCAT | chr1:19423120-19423144 | 1 | 1 | 1 | 0 | 0 | - | - | - | - |
| 5813 | GCCGGGGGACGAGGTGAGGCGGC | chr1:20209215-20209281 | 0 | 1 | 1 | 0 | 0 | - | - | - | - |
| 5957 | AGGAGGAGGACGACGAGG | chr1:20880256-20880311 | 0 | 1 | 1 | 0 | 0 | - | - | - | - |
| 6003 | ACAGGGCCTAGGAGC | chr1:21049388-21049432 | 0 | 1 | 1 | 0 | 0 | - | - | - | - |
| 6063 | TGGAGGAGT | chr1:21268212-21268260 | 0 | 1 | 1 | 0 | 0 | - | - | - | - |
| 6312 | GTCCCCACTGCCCAG | chr1:22222424-22222454 | 0 | 1 | 1 | 0 | 0 | - | - | - | - |
| 6316 | CGCCCCCAGCCCCTCCGCCCC | chr1:22263595-22263886 | 0 | 0 | 1 | 0 | 0 | - | - | - | - |
| 6958 | AAGAAGCAC | chr1:24997915-24997978 | 0 | 1 | 1 | 0 | 0 | - | - | - | - |
| 7369 | CCCCCCCACAGGTACCTGCCCCTGCTGCGCCCCCCGACCTGCCTTCAGAC | chr1:26510310-26510508 | 0 | 0 | 1 | 0 | 0 | - | - | - | - |
| 7380 | GGGACCGGGACCGGGACC | chr1:26608801-26608909 | 0 | 1 | 1 | 0 | 0 | - | - | - | - |
| 7391 | AGGCAGCAGGAGCACCAGGGCCCTTCACCACCTCCTTCTGGGTGGGAGATG | chr1:26671272-26671943 | 0 | 0 | 1 | 0 | 0 | - | - | - | - |
| 7473 | GCGGCGGCGGAGCCCGGC | chr1:27023144-27023196 | 0 | 1 | 1 | 0 | 0 | - | - | - | - |
| 7519 | GCAGCG | chr1:27153443-27153491 | 0 | 1 | 1 | 0 | 0 | - | - | - | - |
| 7645 | CCAACGGTGTGT | chr1:27623562-27623598 | 0 | 1 | 1 | 0 | 0 | - | - | - | - |
| 7652 | AGTCAGGTGATGAGCCCAAGGGTGCCTTGTGCTAGAAGCTGCCTCGAACCCACCAATAATGTTCTCCAGCCAAGGCCCACTCAGGTGATGAGCCCA | chr1:27682602-27682889 | 0 | 0 | 1 | 0 | 0 | - | - | - | - |
| 7718 | CCTTACCTGCAT | chr1:27995437-27995761 | 0 | 0 | 1 | 1 | 2 | 2 | 0 | 1 | 1 |
| 8047 | TGCTGCCTCGCT | chr1:29475235-29475281 | 0 | 1 | 1 | 0 | 0 | - | - | - | - |
| 8048 | GCTCCTGCTGCG | chr1:29475356-29475440 | 0 | 1 | 1 | 0 | 0 | - | - | - | - |
| 8049 | GCTCCG | chr1:29475680-29475722 | 0 | 1 | 1 | 0 | 0 | - | - | - | - |
| 8478 | CCGCGGCCCCGGCCCCGG | chr1:31381347-31381668 | 0 | 0 | 1 | 0 | 0 | - | - | - | - |
| 8606 | AAGAAGAAGAAAAAG | chr1:31836992-31837052 | 0 | 1 | 1 | 0 | 0 | - | - | - | - |
| 8662 | GCACACACACACAT | chr1:32128097-32128189 | 0 | 1 | 1 | 0 | 0 | - | - | - | - |
| 8826 | GGCGGCGGCAGCGGC | chr1:32936638-32936683 | 0 | 1 | 1 | 0 | 0 | - | - | - | - |
| 9060 | CCCATCAGAGAATCCACACAGGAGAGAAGCCCTATAAATGCCTTGAATGTGGAAAAAACTTTAGTGACCACTCTAACCTCAATCA | chr1:33960123-33960706 | 0 | 0 | 1 | 0 | 0 | - | - | - | - |
| 9234 | TGGTGGTGA | chr1:35370280-35370326 | 0 | 1 | 1 | 0 | 0 | - | - | - | - |
| 9303 | GATGCGGCGGCGGCT | chr1:35658379-35658469 | 0 | 1 | 1 | 0 | 0 | - | - | - | - |
| 9409 | TTCCAGCCGCCCTAC | chr1:36039647-36039693 | 0 | 1 | 1 | 0 | 0 | - | - | - | - |
| 9440 | TTCATCAATTACGTCCCCATCATA | chr1:36205015-36205088 | 0 | 1 | 1 | 0 | 0 | - | - | - | - |
| 9441 | CTTCTTCTTCCTCTTCCT | chr1:36216861-36216993 | 0 | 1 | 1 | 0 | 0 | - | - | - | - |
| 9519 | GATGGCCGCAGCGGC | chr1:36554504-36554534 | 0 | 1 | 1 | 0 | 0 | - | - | - | - |
| 9520 | CCTGGGGGCCCAGGCTCCC | chr1:36564682-36564738 | 0 | 1 | 1 | 0 | 0 | - | - | - | - |
| 9569 | CCTAAAGAGGAAGTGGCT | chr1:36786116-36786221 | 0 | 1 | 1 | 0 | 0 | - | - | - | - |
| 9883 | GCCGCCCGCCGCCCGCGTGCAG | chr1:38511707-38511771 | 0 | 1 | 1 | 0 | 0 | - | - | - | - |
| 10057 | AGTGAGCGGTCTTGTCGG | chr1:39549917-39549989 | 0 | 1 | 1 | 0 | 0 | - | - | - | - |
| 10131 | AGTGCCCACCCCAGAGGAGCCCACCTCCCCAGCTGCTGC | chr1:39878915-39879911 | 0 | 0 | 1 | 0 | 0 | - | - | - | - |
| 10142 | CTGGGAGTCGAG | chr1:39951233-39951269 | 0 | 1 | 1 | 0 | 0 | - | - | - | - |
| 10329 | CTTACTCAACATCAGAGAATTCATACCGGGGAGAAACCCTATGAATGTAAGGAATGTGGGAAAACCTTCAGACAAACTTCATCG | chr1:40928535-40929207 | 0 | 0 | 1 | 0 | 0 | - | - | - | - |
| 10780 | AGCTGCTCTCACCCGCTCG | chr1:43212911-43212949 | 1 | 1 | 1 | 0 | 0 | - | - | - | - |
| 10878 | CCTCGTGCTGCTGCTCACCGG | chr1:43738734-43738823 | 0 | 1 | 1 | 0 | 0 | - | - | - | - |
| 11239 | GCCCTGGGGTTCTTGTGGCAC | chr1:46089279-46089321 | 0 | 1 | 1 | 0 | 0 | - | - | - | - |
| 11396 | TGGGAAAGGTAAGGCCAGCCAAGGCCAGCCCCTCCC | chr1:46867868-46867940 | 1 | 1 | 1 | 0 | 0 | - | - | - | - |
| 11733 | ATCAATATATATCATATATTGTATATATTAC | chr1:48878705-48878795 | 0 | 1 | 1 | 0 | 0 | - | - | - | - |
| 12271 | TCAGAACTAAAACAAAACATCTTCAA | chr1:52256656-52256708 | 0 | 1 | 1 | 0 | 0 | - | - | - | - |
| 12275 | TCTTCATCATCATCCTCTTCT | chr1:52306051-52306114 | 0 | 1 | 1 | 0 | 0 | - | - | - | - |
| 12424 | TTTTCTGCTTTTGCCTGTGAAACTGGTTGCC | chr1:52991563-52991682 | 0 | 1 | 1 | 0 | 0 | - | - | - | - |
| 12540 | AGGAAAAGGAGGAGG | chr1:53547780-53547825 | 0 | 1 | 1 | 0 | 0 | - | - | - | - |
| 12741 | GCTCTCACCTGGGGACA | chr1:54483637-54483773 | 0 | 1 | 1 | 0 | 0 | - | - | - | - |
| 12845 | CTGTCCCCAC | chr1:55050296-55050327 | 0 | 1 | 1 | 0 | 0 | - | - | - | - |
| 13985 | GAGGAGTGGATGAAGAGACCTCAGGGCTG | chr1:62675598-62675772 | 0 | 0 | 1 | 0 | 0 | - | - | - | - |
| 14767 | GAAGAAGAG | chr1:67423807-67423862 | 0 | 1 | 1 | 0 | 0 | - | - | - | - |
| 17397 | GCAGCGCCA | chr1:85039998-85040034 | 0 | 1 | 1 | 0 | 0 | - | - | - | - |
| 17709 | TCCTAC | chr1:87045895-87045932 | 0 | 1 | 1 | 0 | 0 | - | - | - | - |
| 18165 | TGAAGAAGAGGAAGA | chr1:90493001-90493220 | 0 | 0 | 1 | 0 | 0 | - | - | - | - |
| 18286 | GCTGCTGGGGCGGCAGCGGCGGCG | chr1:91182370-91182541 | 0 | 0 | 1 | 0 | 0 | - | - | - | - |
| 18476 | GCTGGGTTGG | chr1:92149254-92149315 | 0 | 1 | 1 | 0 | 0 | - | - | - | - |
| 19181 | GCTGCTGCAGCA | chr1:97270393-97270429 | 0 | 1 | 1 | 0 | 0 | - | - | - | - |
| 21192 | GAGGAGGAAGAA | chr1:109815537-109815573 | 0 | 1 | 1 | 0 | 0 | - | - | - | - |
| 21234 | CAGGGCCAGGACCAGGAC | chr1:110022074-110022129 | 0 | 1 | 1 | 0 | 0 | - | - | - | - |
| 21262 | CACCCCCGACCAAT | chr1:110301828-110301870 | 0 | 1 | 1 | 0 | 0 | - | - | - | - |
| 21482 | CAGGGGTCACAGACTGATGACCCA | chr1:111957495-111957701 | 0 | 0 | 1 | 0 | 0 | - | - | - | - |
| 22177 | ATCATCTTCATC | chr1:116243912-116243959 | 0 | 1 | 1 | 0 | 0 | - | - | - | - |
| 22823 | GGCTGAAGCCTTGCCGCACTCGGCGCACAGGTAGGGCCGCTCGCCCGTGTGCAGGCGCAGGTGCTTGAGTCAGGTAGGCGTCGCC | chr1:120165983-120166240 | 0 | 0 | 1 | 0 | 0 | - | - | - | - |
| 22863 | TTTGCTTTAGATTCTTCCTGTCCAGTT | chr1:120436638-120436831 | 0 | 0 | 1 | 0 | 0 | - | - | - | - |
| 24400 | CTTCATCCTCAT | chr1:150199007-150199127 | 0 | 1 | 1 | 0 | 0 | - | - | - | - |
| 24757 | GTAGGCTGCTGG | chr1:151678817-151678867 | 0 | 1 | 1 | 0 | 0 | - | - | - | - |
| 24826 | GGCGCAGCTGCTGTTCTTCCCTCTCCTGGCGGAGCTGTTCCTCCTCGCGGAATTTTCTGTCAGCTCCTGGC | chr1:152080252-152081419 | 0 | 0 | 1 | 0 | 0 | - | - | - | - |
| 24834 | GCGCAGCCGCTGTTCCTCCTCAAGGAATTTTCTCTCCTCGTTCCTGACG | chr1:152081492-152081682 | 0 | 0 | 1 | 0 | 0 | - | - | - | - |
| 24835 | GCTGCAGCTCCTCTTCCTCCCGATATTGCCTCTCCCGCTCCTGGCGCCTTCTCTTCTCCCGTTCCTCTCTCAGCAGCTGCTCTTCCTCCT | chr1:152082073-152083144 | 0 | 0 | 1 | 0 | 0 | - | - | - | - |
| 24836 | CTCCTCTTCCTCTCTGCAGCAG | chr1:152082125-152082276 | 0 | 0 | 1 | 0 | 0 | - | - | - | - |
| 24837 | TTCCTCCTGCAGCAGCTCCTC | chr1:152082311-152082602 | 0 | 0 | 1 | 0 | 0 | - | - | - | - |
| 24839 | TTCCTCTCTGCAGCAGCTGCTC | chr1:152082851-152083004 | 0 | 0 | 1 | 0 | 0 | - | - | - | - |
| 24840 | TCCTCCTCCTCCTCGCTTCAGCACCTGCTCGCGCCTCTCTTCCTCCTGCTCGCGCTTCAGCCGCTGCTCGCGCCTC | chr1:152083620-152084986 | 0 | 0 | 1 | 0 | 0 | - | - | - | - |
| 24863 | CTGATGGTTCTGCTCATCTTCATGGGTTTGCCTGTCTCGTCT | chr1:152127183-152127518 | 0 | 0 | 1 | 0 | 0 | - | - | - | - |
| 24866 | ATAGTGGGAACTCTGGCCTTGTCTGTCTGTCTGACC | chr1:152127825-152128761 | 0 | 0 | 1 | 1 | 40 | 40 | 0 | 20 | 20 |
| 24867 | TGTCTTGTCTCTCAGGCTGACTGTGGTGGGAATCTC | chr1:152129006-152129185 | 0 | 0 | 1 | 0 | 0 | - | - | - | - |
| 24901 | GACTGGCCTGAGCCAGACCCATGTCGGCCATAGCTGGAA | chr1:152185720-152186071 | 0 | 0 | 1 | 1 | 8 | 6 | 0 | 2 | 2 |
| 24904 | TAGCTAGAAGACTGACCTGAGCCAGACCCATGCTGGCCGTGGCTGGAAGACTGACCTGAGCCAGACTCCATGTTGGCCA | chr1:152186296-152190526 | 0 | 0 | 1 | 0 | 0 | - | - | - | - |
| 24916 | GAAGACTGACCGGAGCCAGACCATATGGGCCACGGCTG | chr1:152190961-152191202 | 0 | 0 | 1 | 0 | 0 | - | - | - | - |
| 24917 | GAAGACTGACCTGAGCCAGACCCATGTCGGCCACTAGCTG | chr1:152191315-152191589 | 0 | 0 | 1 | 0 | 0 | - | - | - | - |
| 24918 | GGAGCCAGACTCATGTGGGCCACGGCTGGAAGACCTCCCT | chr1:152192370-152192650 | 0 | 0 | 1 | 0 | 0 | - | - | - | - |
| 24956 | GATTGACCTGAGCCTGACCCATGTTGTCCAAAGCCAGAG | chr1:152326617-152329257 | 0 | 0 | 1 | 0 | 0 | - | - | - | - |
| 24994 | CCTCCCAAGTGTACCCCTAAATGC | chr1:152484046-152484142 | 0 | 1 | 1 | 0 | 0 | - | - | - | - |
| 24996 | TCTGGGGGCTCCAGCTGCTGCCACAGC | chr1:152484295-152484374 | 0 | 1 | 1 | 0 | 0 | - | - | - | - |
| 25005 | TGGGGGACACTTGGG | chr1:152538615-152538645 | 0 | 1 | 1 | 0 | 0 | - | - | - | - |
| 25016 | AAATGTCCACCCAAGTGTACCCCA | chr1:152636623-152636692 | 0 | 1 | 1 | 0 | 0 | - | - | - | - |
| 25023 | TGTCCACCCAAGTGTACCCCAAAA | chr1:152659364-152659412 | 0 | 1 | 1 | 0 | 0 | - | - | - | - |
| 25025 | CCCAAGTGCCCCCCAAAATGCCCA | chr1:152671416-152671488 | 0 | 1 | 1 | 0 | 0 | - | - | - | - |
| 25026 | CCAGCTCTGGGGGCTGCTGCAGCT | chr1:152671513-152671583 | 0 | 1 | 1 | 0 | 0 | - | - | - | - |
| 25028 | CAGCTCTGAGGGAGGTGGCTGCTG | chr1:152681679-152681727 | 0 | 1 | 1 | 0 | 0 | - | - | - | - |
| 25029 | CAAACCTACGTGAAGTGCCCAGCTCCCTGCCAGACGACCTATGTAAAATACCCAACACCCTGC | chr1:152692189-152692378 | 0 | 0 | 1 | 0 | 0 | - | - | - | - |
| 25036 | TGCCAGTCTCAGACCACAGCAGGTGAAG | chr1:152732256-152732310 | 0 | 1 | 1 | 0 | 0 | - | - | - | - |
| 25039 | CTGCTGCAGCTCCAGCTCCGGAGG | chr1:152748972-152749194 | 0 | 0 | 1 | 0 | 0 | - | - | - | - |
| 25049 | CAGCTCTGGGGGCTGCTGTGGCTC | chr1:152770395-152770493 | 0 | 1 | 1 | 0 | 0 | - | - | - | - |
| 25051 | CAGCATGCCCCCAGAGCTGGAGCCA | chr1:152777751-152777846 | 0 | 1 | 1 | 0 | 0 | - | - | - | - |
| 25054 | GGGCACTTGGGA | chr1:152777880-152777927 | 0 | 1 | 1 | 0 | 0 | - | - | - | - |
| 25064 | GCCCCACTCCCAAGTGCACCCCCAAAGTGTCCCTCCCAAGT | chr1:152799980-152800057 | 0 | 1 | 1 | 0 | 0 | - | - | - | - |
| 25077 | CCCAGCCAAAACACAATCAATGCTG | chr1:152856906-152857095 | 0 | 0 | 1 | 0 | 0 | - | - | - | - |
| 25080 | TGGAGCTCCCAGAGCAGCAGGAGGGGCAGCTGAAGCACCTAGAGCAGCAGGAGGGGCAGCTGAAGCACCTGGAGCAGCAGGAGGGGCAGC | chr1:152882730-152883891 | 0 | 0 | 1 | 0 | 0 | - | - | - | - |
| 25102 | GAGCCAGGCTGTACCAAGGTCCCT | chr1:152975658-152975970 | 0 | 0 | 1 | 0 | 0 | - | - | - | - |
| 25122 | CACTTTGAGGGTGGACAGGGCTCAGGG | chr1:153085087-153085166 | 0 | 1 | 1 | 0 | 0 | - | - | - | - |
| 25147 | CGGCGGCGGGGGCTACTCCGGCGGCGG | chr1:153233586-153233955 | 0 | 0 | 1 | 0 | 0 | - | - | - | - |
| 25153 | GCGGCGGCTCTGGCT | chr1:153233969-153234047 | 0 | 1 | 1 | 0 | 0 | - | - | - | - |
| 25171 | AAGACCACAGTGGCC | chr1:153333312-153333384 | 0 | 1 | 1 | 0 | 0 | - | - | - | - |
| 25261 | GCTGCCCCTGCTGCT | chr1:153747976-153748070 | 0 | 1 | 1 | 0 | 0 | - | - | - | - |
| 25304 | GAAGAGGAGGAGGAG | chr1:153923919-153924022 | 0 | 1 | 1 | 0 | 0 | - | - | - | - |
| 25423 | ATTTCTGAAAAACACACACC | chr1:154461828-154461868 | 1 | 1 | 1 | 0 | 0 | - | - | - | - |
| 25433 | CCCCTGGCCCCGCCAGCTGCTG | chr1:154530963-154531117 | 0 | 0 | 1 | 0 | 0 | - | - | - | - |
| 25510 | TGCTCCCTGAGGGCCT | chr1:154919028-154919076 | 0 | 1 | 1 | 0 | 0 | - | - | - | - |
| 25521 | ACTCCTTCCTGCAGT | chr1:155018935-155019030 | 0 | 1 | 1 | 0 | 0 | - | - | - | - |
| 25560 | GGCTGCTGACC | chr1:155154433-155154465 | 0 | 1 | 1 | 0 | 0 | - | - | - | - |
| 25561 | GGCCGAGGTGACACCGTGGGCTGGGGGGGCGGTGGAGCCCGGGGCCGGCCTGGTGTCCGG | chr1:155160983-155161823 | 0 | 0 | 1 | 0 | 0 | - | - | - | - |
| 25578 | CGGGGCTGCGGCTGGG | chr1:155220199-155220230 | 0 | 1 | 1 | 0 | 0 | - | - | - | - |
| 25726 | GGGGCT | chr1:155887375-155887406 | 0 | 1 | 1 | 0 | 0 | - | - | - | - |
| 25760 | GCGGCGGCGGCGGCCGGCT | chr1:156051539-156051592 | 0 | 1 | 1 | 0 | 0 | - | - | - | - |
| 25790 | CTGTTTGTTTTGTTCTCAGC | chr1:156195308-156195348 | 1 | 1 | 1 | 0 | 0 | - | - | - | - |
| 25793 | CCCTCTCTCCTCTG | chr1:156213760-156213803 | 0 | 1 | 1 | 0 | 0 | - | - | - | - |
| 25847 | GGCTGCTGTGGCTGCTGTGGCTGT | chr1:156438628-156438724 | 0 | 1 | 1 | 0 | 0 | - | - | - | - |
| 25890 | GCCTCCAACCCA | chr1:156621276-156621312 | 0 | 1 | 1 | 0 | 0 | - | - | - | - |
| 25891 | GAAGAAGAGAAAGAGGAAGAA | chr1:156622104-156622167 | 0 | 1 | 1 | 0 | 0 | - | - | - | - |
| 25905 | CCTCTTCCTCTTCAT | chr1:156713489-156713519 | 0 | 1 | 1 | 0 | 0 | - | - | - | - |
| 25929 | ACTGCTTTCTCTCCTCCCTCTG | chr1:156844102-156844191 | 0 | 1 | 1 | 0 | 0 | - | - | - | - |
| 26376 | CTCTTCTTCCTC | chr1:160209873-160209909 | 0 | 1 | 1 | 0 | 0 | - | - | - | - |
| 26522 | GGGCCA | chr1:161021108-161021161 | 0 | 1 | 1 | 0 | 0 | - | - | - | - |
| 26786 | GCAGCTCCTCCA | chr1:162326865-162326946 | 0 | 1 | 1 | 0 | 0 | - | - | - | - |
| 26887 | TGGCCATCATCTGTCATCATCC | chr1:162737072-162737114 | 0 | 1 | 1 | 0 | 0 | - | - | - | - |
| 27164 | CGGCGGCAG | chr1:164761841-164761889 | 0 | 1 | 1 | 0 | 0 | - | - | - | - |
| 27503 | GCCCTTCCTCCAGCCCTTCCTCCGGAGCCCTCCTCCA | chr1:167404143-167404668 | 0 | 0 | 1 | 0 | 0 | - | - | - | - |
| 27874 | CTGAGGTCTGGAGAAAGGGTTGTCTGG | chr1:169510161-169510782 | 0 | 0 | 1 | 1 | 40 | 40 | 0 | 20 | 20 |
| 27875 | CTAGGAAGGTCCTCCCAGGGCCTCATTCCGGAAGGAGAACCAGTGTCTTGG | chr1:169511541-169511643 | 0 | 1 | 1 | 0 | 0 | - | - | - | - |
| 28158 | GGGAGCGAGAAAAAGAAC | chr1:171501752-171501878 | 0 | 1 | 1 | 0 | 0 | - | - | - | - |
| 28159 | AAAAGAAAAAGAACTACAAAAGCATGAAAG | chr1:171501918-171502011 | 0 | 1 | 1 | 0 | 0 | - | - | - | - |
| 28166 | GCTCCAGTTCCAGCCTCAACCTCA | chr1:171526510-171526987 | 0 | 0 | 1 | 0 | 0 | - | - | - | - |
| 28301 | TCAACTCCTGTT | chr1:172555053-172555090 | 0 | 1 | 1 | 0 | 0 | - | - | - | - |
| 28315 | GCCACCACCACCACCGCCACC | chr1:172628472-172628535 | 0 | 1 | 1 | 0 | 0 | - | - | - | - |
| 28444 | TTCACATAGTTTCTGTAAAAAATTAAGAAAAACATGCATTTCTTATTA | chr1:173495841-173495937 | 0 | 1 | 1 | 0 | 0 | - | - | - | - |
| 29479 | CTTTTATTTATTCCTAAG | chr1:179869151-179869263 | 0 | 1 | 1 | 0 | 0 | - | - | - | - |
| 29764 | AACCCGCTC | chr1:181701637-181701693 | 0 | 1 | 1 | 0 | 0 | - | - | - | - |
| 29766 | GGGCCTGGCCCT | chr1:181701723-181701747 | 1 | 1 | 1 | 0 | 0 | - | - | - | - |
| 29915 | TTTTTTCATAAAACTTATTCAT | chr1:182545478-182545524 | 0 | 1 | 1 | 0 | 0 | - | - | - | - |
| 29961 | TGGTGGAGGCTATGGTAGCGGAGGCTA | chr1:182856298-182856409 | 0 | 1 | 1 | 0 | 0 | - | - | - | - |
| 30418 | TGTTTTTTTGTT | chr1:186057240-186057278 | 0 | 1 | 1 | 0 | 0 | - | - | - | - |
| 30452 | CACCACTCCCAAGGAGCCTGCACC | chr1:186275882-186277358 | 0 | 0 | 1 | 0 | 0 | - | - | - | - |
| 31546 | TATATATGCATATATATAACACATATAACACATATAATATATATGC | chr1:192320774-192321177 | 0 | 0 | 1 | 0 | 0 | - | - | - | - |
| 31695 | CCGCAGCTC | chr1:193074400-193074436 | 0 | 1 | 1 | 0 | 0 | - | - | - | - |
| 32991 | CCGCCGCCGCAGCCACTACCA | chr1:200378738-200378826 | 0 | 1 | 1 | 0 | 0 | - | - | - | - |
| 33049 | AAAAAAAATACCTTGGTCTGGGTCATCACCAGGGTGAAAACTGAATGAGATCGGGAACTTTT | chr1:200574275-200574461 | 0 | 0 | 1 | 0 | 0 | - | - | - | - |
| 33098 | CGCGCTGCGCGGGCA | chr1:200842515-200842562 | 0 | 1 | 1 | 0 | 0 | - | - | - | - |
| 33107 | GGAAAGAGGGGAAGAA | chr1:200943159-200943223 | 0 | 1 | 1 | 0 | 0 | - | - | - | - |
| 33129 | CTCCCTGCCCCGTGACCGTCCCACCATG | chr1:201031482-201031605 | 0 | 1 | 1 | 0 | 0 | - | - | - | - |
| 33131 | GAGCAGGATGAA | chr1:201038656-201038680 | 1 | 1 | 1 | 0 | 0 | - | - | - | - |
| 33154 | TAAGGCAGGTTATAGGAAGGATTTGGGAGCTTCTGAGGAAATGGGTTCAGGAG | chr1:201178598-201180974 | 0 | 0 | 1 | 1 | 40 | 20 | 20 | 20 | 19 |
| 33251 | TCATCCTCCTTTTTGGTGTCTGTGTTCCCAGCTCCTCTTTTTACCTTC | chr1:201869334-201869618 | 0 | 0 | 1 | 0 | 0 | - | - | - | - |
| 33278 | GGGGCGGGGCCCGCGCGCGCGC | chr1:201951698-201951851 | 0 | 0 | 1 | 0 | 0 | - | - | - | - |
| 33362 | TTTATACTATATATAC | chr1:202302073-202302137 | 0 | 1 | 1 | 0 | 0 | - | - | - | - |
| 33844 | CACCTACCACCATCGCCAC | chr1:204966414-204966511 | 0 | 1 | 1 | 0 | 0 | - | - | - | - |
| 34163 | TCCACACATCTGCAGCTGGAGTTCCCAAGA | chr1:207133911-207134008 | 0 | 1 | 1 | 0 | 0 | - | - | - | - |
| 34169 | GGAGCTGGATGGTGTGT | chr1:207196400-207196432 | 0 | 1 | 1 | 0 | 0 | - | - | - | - |
| 34554 | CTGCAATTGCCCACA | chr1:209965720-209965750 | 0 | 1 | 1 | 0 | 0 | - | - | - | - |
| 34976 | ATCATAATCTTAAATAATACT | chr1:212548447-212548536 | 0 | 1 | 1 | 0 | 0 | - | - | - | - |
| 35004 | GCAGCAGCAGGG | chr1:212799053-212799102 | 0 | 1 | 1 | 0 | 0 | - | - | - | - |
| 36121 | GGCCAAATATTTTATGTATGAATGATAATTATCATTTTATCTTTGCAGATTTTGAAAGACAT | chr1:220273721-220273845 | 0 | 1 | 1 | 0 | 0 | - | - | - | - |
| 36225 | GCAGCAGCAACAGCC | chr1:221053582-221053612 | 1 | 1 | 1 | 0 | 0 | - | - | - | - |
| 36833 | TATTTTAAAATGAATTTAT | chr1:224484152-224484209 | 0 | 1 | 1 | 0 | 0 | - | - | - | - |
| 37021 | CTTTCTTGCCTCTCCCGTTCCAGT | chr1:225706967-225707261 | 0 | 0 | 1 | 0 | 0 | - | - | - | - |
| 37440 | AACATAAGAGAATTCATACTGGAGAGAAACCCTACAAATGTGAAGAATGTGGCAAAGCTTTTAATCGATGTTCAAACCTAACTA | chr1:227842291-227843553 | 0 | 0 | 1 | 0 | 0 | - | - | - | - |
| 37571 | GGCCCAGGGACTCAGCCCTTGCAGGTGTACACCTCCTCACACCATGTGCAATGCCTGCACTCATGAGCAGCAGGGCTGACTG | chr1:228108774-228109293 | 0 | 0 | 1 | 0 | 0 | - | - | - | - |
| 37643 | CTCTTTGTCTTTCTTCTTCTTCTCCTTCTTGCTGTTTC | chr1:228289086-228289159 | 0 | 1 | 1 | 0 | 0 | - | - | - | - |
| 37662 | GCGCCGCCGCCCCCGCCCCCC | chr1:228346352-228346413 | 0 | 1 | 1 | 0 | 0 | - | - | - | - |
| 37685 | CGGTGTTTGCCAAGGAGCAGC | chr1:228459634-228459714 | 0 | 1 | 1 | 0 | 0 | - | - | - | - |
| 37733 | CCTCCCAGGTGAGCT | chr1:228559837-228559897 | 0 | 1 | 1 | 0 | 0 | - | - | - | - |
| 37988 | CCGCGTCCT | chr1:229477854-229477944 | 0 | 1 | 1 | 0 | 0 | - | - | - | - |
| 38024 | CCCAGGACGCCCCGCGAGG | chr1:229694127-229694184 | 0 | 1 | 1 | 0 | 0 | - | - | - | - |
| 39219 | TCATCCTCT | chr1:235377251-235377343 | 0 | 1 | 1 | 0 | 0 | - | - | - | - |
| 40261 | ACCCCCTCCGCCCCCTCTACCCGGAGCGGGCAT | chr1:240370838-240371841 | 0 | 0 | 1 | 0 | 0 | - | - | - | - |
| 40876 | AGAGAAAGAGAAGAAAG | chr1:243332860-243332932 | 0 | 1 | 1 | 0 | 0 | - | - | - | - |
| 41184 | GTTGTAGTTCCCTCT | chr1:245018728-245018776 | 0 | 1 | 1 | 0 | 0 | - | - | - | - |
| 41185 | CTTCCT | chr1:245027326-245027362 | 0 | 1 | 1 | 0 | 0 | - | - | - | - |
| 41263 | CTCGGGCACCCCGTCTCCCGAG | chr1:245319714-245319777 | 0 | 1 | 1 | 0 | 0 | - | - | - | - |
| 41695 | GGTTAAAAGCTTTGCCACATTCTTCACATTTGTAGGGTTTCTCTCCAGTATGAATTCTCTTATGTTGAGTAAGGTATGAGAACA | chr1:247150309-247151315 | 0 | 0 | 1 | 0 | 0 | - | - | - | - |
| 41720 | TCTTTCATGCTTCGAAGGGAACTGGAACAACTGAAGGCTTTACCACATTTCTTACATTCATAGGGTTTCTCTCCAGTATGAGT | chr1:247200765-247201353 | 0 | 0 | 1 | 1 | 40 | 13 | 0 | 20 | 20 |
| 41729 | TTACATTCATAGGGTCTCTCTCCAGTATGAATACTTCCATGGTAACGAAGGGAACTGAAACGACTGAAGGCTTTGTCACATTGT | chr1:247263808-247264396 | 0 | 0 | 1 | 1 | 40 | 29 | 0 | 20 | 20 |
| 41738 | TTACATTCATAGGGTTTCTCTCCAGTATGAGTCCTTTCATGGTCACGAAGGAACTGGAACAACTGAAGGCTTTCCCACATTGC | chr1:247319877-247320551 | 0 | 0 | 1 | 0 | 0 | - | - | - | - |
| 41797 | TGGGCTCCTCACTTTCC | chr1:247492808-247492842 | 0 | 1 | 1 | 0 | 0 | - | - | - | - |
| 42023 | CAAAGCCACAGGGACTAGGAAGCATTGGAATTCTAAAGAAGGGAAACACCTCAAGGCAGCGTGAGGGTTCATCCTCCCCAGACATTCCTCTTGTCAATCC | chr1:248685880-248686180 | 0 | 0 | 1 | 0 | 0 | - | - | - | - |
| 42212 | ACTCCTGTGTGGACAGACAGTGAGGGGAGGGGACTCCTGTGTGGACAGGCAGTGCGGGGGGGGGGGCG | chr10:433374-433709 | 0 | 0 | 1 | 0 | 0 | - | - | - | - |
| 42237 | AACAGACACTGAGCTTCGTGCGTTCGGGAGTGGCTGCGCGAGGGGGTGGGCAAAGGGCAGAGGGTAAGCCTCGGGATTACCTTAAGTGAGGATGTA | chr10:459580-459868 | 0 | 0 | 1 | 0 | 0 | - | - | - | - |
| 44242 | ACGGGAGGTGAGTGTAGGGGAGCGGAGGGCCGA | chr10:5454776-5455052 | 0 | 0 | 1 | 0 | 0 | - | - | - | - |
| 44371 | GAGAAAATAAAACTACTTACTA | chr10:5836805-5836849 | 0 | 1 | 1 | 0 | 0 | - | - | - | - |
| 44480 | GGAATAAGGCTGGGCCGCGGGCGTAGGGCTGGGCTGTG | chr10:6257276-6257454 | 0 | 0 | 1 | 0 | 0 | - | - | - | - |
| 44920 | ATGGACAATGCCAGCAAGAATGCTTGTAAGCACACAGT | chr10:7844363-7844439 | 0 | 1 | 1 | 0 | 0 | - | - | - | - |
| 44940 | CCAAGAGCC | chr10:8006416-8006451 | 0 | 1 | 1 | 0 | 0 | - | - | - | - |
| 44941 | AAGGAGAAGAAGAAAAAGAAGGAAAA | chr10:8007561-8007704 | 0 | 0 | 1 | 0 | 0 | - | - | - | - |
| 44943 | AAAAAGGAGAAGAAG | chr10:8007585-8007706 | 0 | 1 | 1 | 0 | 0 | - | - | - | - |
| 45747 | CTCTTCTTGTTTCTTTCTTTCTTC | chr10:12077101-12077263 | 0 | 0 | 1 | 0 | 0 | - | - | - | - |
| 45818 | CCGCGCCGCGCCCCCGGCCGCCCCCT | chr10:12391747-12391826 | 0 | 1 | 1 | 0 | 0 | - | - | - | - |
| 46060 | CGCCCCCCG | chr10:13699133-13699179 | 0 | 1 | 1 | 0 | 0 | - | - | - | - |
| 46308 | TAGTTAAGGTATGTTTAGCTTTTCTATAC | chr10:14909286-14909344 | 0 | 1 | 1 | 0 | 0 | - | - | - | - |
| 46765 | ACTTACTCTGCCGGTATTCAC | chr10:17085735-17085841 | 0 | 1 | 1 | 0 | 0 | - | - | - | - |
| 47742 | CCTCCTCCTCCTCTCCCT | chr10:21805466-21805519 | 0 | 1 | 1 | 0 | 0 | - | - | - | - |
| 47775 | ACTTAGTTTCTCTTCTTTCTTACGCTAGGACTTAACCTCCAGTGG | chr10:22022623-22022713 | 0 | 1 | 1 | 0 | 0 | - | - | - | - |
| 47971 | AAGAACAAGTAAAGAA | chr10:23297279-23297310 | 0 | 1 | 1 | 0 | 0 | - | - | - | - |
| 48027 | GCGGCGGGGCGCCGGGCG | chr10:23482135-23482189 | 0 | 1 | 1 | 0 | 0 | - | - | - | - |
| 48831 | CTCCTCCGGCAGGGGTGCATCGTCCAG | chr10:27702882-27703019 | 0 | 1 | 1 | 0 | 0 | - | - | - | - |
| 49906 | AACTTCAAGAAAAAGT | chr10:33018355-33018387 | 0 | 1 | 1 | 0 | 0 | - | - | - | - |
| 50472 | CCCCCGCCGCCGCCCGGC | chr10:35928369-35928487 | 0 | 1 | 1 | 0 | 0 | - | - | - | - |
| 50475 | CGCCGCCCGCGCCCG | chr10:35929234-35929342 | 0 | 1 | 1 | 0 | 0 | - | - | - | - |
| 50859 | AAGGTTTTCCCACATTCATTACATTCATAGGGTTTCTCCCCTGTGTGTGTTCTCTGATGTTCAGTGAGGTTTGACTTCTCACAG | chr10:38120612-38121530 | 0 | 0 | 1 | 0 | 0 | - | - | - | - |
| 50884 | TCTGATGTACAGTGAGGTGTGACTTCTGGAAAAGGTTTCCCACATTCCTTACATTCATAGGGTTTCTCCCCTGTGTGATTTC | chr10:38241089-38242099 | 0 | 0 | 1 | 0 | 0 | - | - | - | - |
| 50902 | AGGAGAGAAACCCTTTGAATGTAATGAATGTGGGAAAGCTTTCTGCCAGAAGTCAGACCTCACTAAACATCAGAGAACACACAC | chr10:38344023-38345612 | 0 | 0 | 1 | 0 | 0 | - | - | - | - |
| 50916 | AAACCTTATGAATGTCATGAATGTGGGAAAACCTTCTCTGAGAAGTCAACCCTCACTAAACATCAAAGAACTCACACAGGGGAG | chr10:38406883-38408313 | 0 | 0 | 1 | 0 | 0 | - | - | - | - |
| 51460 | TGACTTATGGCTAAAGATTTTCCCACATTCATTACATTCATAGGGTTTCTCCCCTGTGTGTGTTCTCTGATGTTGAGTGAGGTA | chr10:43088447-43089700 | 0 | 0 | 1 | 0 | 0 | - | - | - | - |
| 51589 | GCCCCACAGCCCCAGCCAGGCCACGCCCCAACCCTAGCCCTGACCCCGCCCCCAG | chr10:43698295-43698766 | 0 | 0 | 1 | 0 | 0 | - | - | - | - |
| 51697 | CGCTGGTGGATGTGAAGTTTGGAGCTCTGACTGAAGCCCTTCCCACACTTGTCACACTTATAGGGCTTCTCTCCTGTGTGGACT | chr10:44052175-44053015 | 0 | 0 | 1 | 1 | 40 | 28 | 5 | 20 | 20 |
| 51704 | ACATCAGAGAATCCATACTGGAGAAAAACCCTATAAATGTAATGAAATGTGGGAAAGCCTTTCCCCGACAGCTCAGCCCTTGAAGCA | chr10:44112603-44112856 | 0 | 0 | 1 | 0 | 0 | - | - | - | - |
| 52424 | ACAGGCTCCCTGCAGCCCAAGGATCTGCCTGAGACACAGCCAGGAGTGCCTTGCCCTCAA | chr10:47700875-47701184 | 0 | 0 | 1 | 0 | 0 | - | - | - | - |
| 53164 | GTGGCTGTGGAGCTCTGG | chr10:52005096-52005186 | 0 | 1 | 1 | 0 | 0 | - | - | - | - |
| 53368 | TGCCCCCTGCATACCTCCTCCTTGTATACCTCCTCCCTGCATGACTGACTCCTTGTATGCC | chr10:53457656-53457836 | 0 | 0 | 1 | 0 | 0 | - | - | - | - |
| 53373 | CCAGGG | chr10:53458650-53458680 | 0 | 1 | 1 | 0 | 0 | - | - | - | - |
| 56184 | CGGGAAGGCAATAGAGGCTTCAGGGGACAG | chr10:70742367-70742487 | 0 | 1 | 1 | 0 | 0 | - | - | - | - |
| 56508 | CCCAACCCTGG | chr10:72520234-72520290 | 0 | 1 | 1 | 0 | 0 | - | - | - | - |
| 56604 | GGCCAGATATTCCAGCTGCACACCACGCTGGCGGAGGTGAGGGAAGGGC | chr10:73056463-73056861 | 0 | 0 | 1 | 0 | 0 | - | - | - | - |
| 56657 | CCCATCCAGACCCACCA | chr10:73377170-73377204 | 0 | 1 | 1 | 0 | 0 | - | - | - | - |
| 56875 | GGGGCGCCGGCGGCTG | chr10:74451955-74452038 | 0 | 1 | 1 | 0 | 0 | - | - | - | - |
| 56962 | TCTGTAGCCTCTGCA | chr10:75010616-75010661 | 0 | 1 | 1 | 0 | 0 | - | - | - | - |
| 56993 | CAGGATAGCCTCCAGGCG | chr10:75157977-75158049 | 0 | 1 | 1 | 0 | 0 | - | - | - | - |
| 57046 | GGGGGTCTTAGGAGCCACTGGGG | chr10:75407220-75407337 | 0 | 1 | 1 | 0 | 0 | - | - | - | - |
| 57049 | CTTGGCTGAGGGGCT | chr10:75410722-75410752 | 0 | 1 | 1 | 0 | 0 | - | - | - | - |
| 57252 | GAAGAAGAGGAGGAG | chr10:76781827-76781929 | 0 | 1 | 1 | 0 | 0 | - | - | - | - |
| 57258 | GAGGAA | chr10:76788632-76788758 | 0 | 1 | 1 | 0 | 0 | - | - | - | - |
| 57330 | CCTCCCCTCCCTCGCTCGC | chr10:77158456-77158510 | 0 | 1 | 1 | 0 | 0 | - | - | - | - |
| 57997 | TGGATGAGGTCCCGGAGGACTGACAGCTGCAGGAGG | chr10:81266204-81267709 | 0 | 0 | 1 | 0 | 0 | - | - | - | - |
| 58117 | GCTGCCCAGGGTAGGGCACTGGAG | chr10:81928795-81928917 | 0 | 1 | 1 | 0 | 0 | - | - | - | - |
| 58424 | GCCGCCGCGGCCGCAGCCCGCGCCCGAGCCC | chr10:83634962-83635240 | 0 | 0 | 1 | 0 | 0 | - | - | - | - |
| 59268 | CCTACACCCCCTCCCCTGCCCCTG | chr10:88476134-88476305 | 0 | 0 | 1 | 0 | 0 | - | - | - | - |
| 59316 | TCGGCCTCCTGAAATGACAGCAGGGAGACTTGGG | chr10:88730322-88730390 | 1 | 1 | 1 | 0 | 0 | - | - | - | - |
| 60670 | GGAGGAGGCTGACGAGGA | chr10:96162516-96162573 | 0 | 1 | 1 | 0 | 0 | - | - | - | - |
| 61040 | CAGGTGGG | chr10:98808520-98808712 | 0 | 0 | 1 | 0 | 0 | - | - | - | - |
| 61113 | CCCGGCCGCGCCGCTGCGGGCC | chr10:99079386-99079540 | 0 | 0 | 1 | 0 | 0 | - | - | - | - |
| 61213 | GCAGCGGCAGCAGCAGCG | chr10:99625392-99625428 | 0 | 1 | 1 | 0 | 0 | - | - | - | - |
| 61570 | CGCTCCAACCCACCGC | chr10:101989127-101989191 | 0 | 1 | 1 | 0 | 0 | - | - | - | - |
| 61706 | CCTCTTCCTCCT | chr10:102763414-102763452 | 0 | 1 | 1 | 0 | 0 | - | - | - | - |
| 61708 | GCTGCG | chr10:102770293-102770380 | 0 | 1 | 1 | 0 | 0 | - | - | - | - |
| 61927 | TCTTCCTCTTCGTCGTCATCA | chr10:103908165-103908207 | 0 | 1 | 1 | 0 | 0 | - | - | - | - |
| 61929 | AGCAGCAGT | chr10:103918980-103919052 | 0 | 1 | 1 | 0 | 0 | - | - | - | - |
| 61930 | AGCAGCTCCAGTGAGGAAGAG | chr10:103920375-103920417 | 0 | 1 | 1 | 0 | 0 | - | - | - | - |
| 61985 | CGGGTATGGGTGCAGGGGGTGGGT | chr10:104157162-104157210 | 1 | 1 | 1 | 0 | 0 | - | - | - | - |
| 61988 | CTTCCCCCTCCCA | chr10:104174580-104174621 | 0 | 1 | 1 | 0 | 0 | - | - | - | - |
| 62009 | GCCCCCGGCCCCACCGCCCCCCCG | chr10:104263933-104264005 | 0 | 1 | 1 | 0 | 0 | - | - | - | - |
| 62095 | CCTGAGTCGCAGGCCGAGGAGACAGTGAGTGCGCGC | chr10:104629254-104629362 | 1 | 1 | 1 | 0 | 0 | - | - | - | - |
| 62214 | TCCTCCTCCACCTCCTCTTCT | chr10:105110524-105110604 | 0 | 1 | 1 | 0 | 0 | - | - | - | - |
| 62330 | CCACCACCACTGCCA | chr10:105816869-105816914 | 0 | 1 | 1 | 0 | 0 | - | - | - | - |
| 63313 | CAGCCGCCGCCCCCGCCC | chr10:112404338-112404395 | 0 | 1 | 1 | 0 | 0 | - | - | - | - |
| 63850 | CCGCGCCCGCGCCGCCGCCGCCGACCA | chr10:115804732-115804809 | 0 | 1 | 1 | 0 | 0 | - | - | - | - |
| 63866 | TTATGCATATCCTGACATGTTT | chr10:115896934-115896994 | 0 | 1 | 1 | 0 | 0 | - | - | - | - |
| 63892 | CAGGTGGGCTGGCCAC | chr10:116059982-116060013 | 0 | 1 | 1 | 0 | 0 | - | - | - | - |
| 64295 | GGTGGAGGAGGAAGTGGT | chr10:118687317-118687353 | 0 | 1 | 1 | 0 | 0 | - | - | - | - |
| 64685 | GGCGCTGGGGCC | chr10:120789594-120789618 | 1 | 1 | 1 | 0 | 0 | - | - | - | - |
| 64688 | TCATCATCCATGCCTCGCCTGGGACCCCGG | chr10:120801684-120802167 | 0 | 0 | 1 | 0 | 0 | - | - | - | - |
| 65199 | TCTTGGGTCAGGATAACAAGGTGAATACGGTTCGAGAGGCTGACTGAGGTCCAAGTATTCCTGAAAGAAGGGAAGAGAAGACGTTTTATTTCA | chr10:123239475-123239659 | 0 | 0 | 1 | 0 | 0 | - | - | - | - |
| 65304 | GGAGCAAAGCCATGAGGTCCAACCAGGAGCACCACCCCCTCCTCTTCCCAA | chr10:123843523-123843625 | 0 | 1 | 1 | 0 | 0 | - | - | - | - |
| 65382 | GACACCATCCACATTGCTAAT | chr10:124399678-124399743 | 0 | 1 | 1 | 0 | 0 | - | - | - | - |
| 65577 | GCCGCGCGCCCAGACGCCTGCCCGGGAGGCCGCGCTGAGGCTCCCGGGTG | chr10:125425685-125425939 | 0 | 0 | 1 | 0 | 0 | - | - | - | - |
| 67632 | CTTGGAGGAGGTAACGAGGGTCTCCTGCCGGGTCCTGGG | chr10:133954073-133954190 | 1 | 1 | 1 | 0 | 0 | - | - | - | - |
| 68104 | TGGACAGGTAGGTGTGGGTGGACAGGTAGGTGGGCTGGACAGGTAGGTGTGC | chr10:134523953-134524434 | 0 | 0 | 1 | 0 | 0 | - | - | - | - |
| 68207 | GAGCCGGGAGCTGGGGATGG | chr10:134622176-134622216 | 0 | 1 | 1 | 0 | 0 | - | - | - | - |
| 68259 | CCTTCT | chr10:134691416-134691512 | 0 | 1 | 1 | 0 | 0 | - | - | - | - |
| 68267 | GGGGGAGCACACTCCGGT | chr10:134699138-134699328 | 0 | 0 | 1 | 0 | 0 | - | - | - | - |
| 68289 | GCACCTCAGCACCGATGAACCCCCCTCTCCACGAC | chr10:134731402-134731965 | 0 | 0 | 1 | 0 | 0 | - | - | - | - |
| 68302 | GGGTCCCGGGGCCTCCCCGGGGCGGGGGTCGTGGC | chr10:134755856-134755961 | 0 | 1 | 1 | 0 | 0 | - | - | - | - |
| 68578 | GGCCCACCAC | chr10:135012461-135012509 | 0 | 1 | 1 | 0 | 0 | - | - | - | - |
| 68598 | CAGGTGAGGAGGGGCTCAGGCGGCCGCGCGCC | chr10:135033613-135034412 | 0 | 0 | 1 | 0 | 0 | - | - | - | - |
| 68673 | GAGAGGGCAGCATGCACCGTCCGTGTCCCCCATGTCCCTCCGTGTCCCCGTGTCCCTCCGTGTCCCCGTGTCCCGGGGAGCCCTACCTGTACGG | chr10:135104724-135106010 | 0 | 0 | 1 | 0 | 0 | - | - | - | - |
| 68705 | TACCTATCGGCAGAGCCCGGAAATCAACGCATCACG | chr10:135111380-135111484 | 0 | 1 | 1 | 0 | 0 | - | - | - | - |
| 68706 | GCCTGTGGACAGCCACGGACACAGGACCTGCTGCAGCATGGA | chr10:135112862-135113039 | 0 | 0 | 1 | 0 | 0 | - | - | - | - |
| 68708 | CCAGGGGTGGCGCTCACCCTGCACCCTGAC | chr10:135115879-135116310 | 0 | 0 | 1 | 0 | 0 | - | - | - | - |
| 68733 | GGCTGGGGTGGGCGGGGCTGCAGAGCTGCTGCT | chr10:135137966-135138300 | 0 | 0 | 1 | 0 | 0 | - | - | - | - |
| 68789 | GTCATCCCAGGGCTCTCTTTCTCCATGCAGGTCTG | chr10:135202324-135202464 | 0 | 1 | 1 | 0 | 0 | - | - | - | - |
| 68795 | CACCTCAGGAAAGGTACTGGCGCGTGCGGCTGAT | chr10:135213110-135213178 | 0 | 1 | 1 | 0 | 0 | - | - | - | - |
| 68813 | CCCGCCGCCAGCCCCGCGGCCGC | chr10:135236928-135237074 | 0 | 0 | 1 | 0 | 0 | - | - | - | - |
| 68954 | CTCGGACCCTGA | chr11:214322-214346 | 1 | 1 | 1 | 0 | 0 | - | - | - | - |
| 69042 | ATGGAGGCGGCCGAACGCGCGCCACGGCGGGT | chr11:377298-377392 | 0 | 1 | 1 | 0 | 0 | - | - | - | - |
| 69044 | GGGTCCTGACCACCTCTCCGCCCCCGGCCCCG | chr11:381283-381668 | 0 | 0 | 1 | 0 | 0 | - | - | - | - |
| 69063 | ACCCCGGCCCCGCTC | chr11:400745-403101 | 0 | 0 | 1 | 0 | 0 | - | - | - | - |
| 69077 | CGCCCCGCACTCATCTCCGCGAACCCC | chr11:420642-420720 | 0 | 1 | 1 | 0 | 0 | - | - | - | - |
| 69090 | GAGGTGGGTGAGCTGGGGAG | chr11:429806-429951 | 0 | 0 | 1 | 0 | 0 | - | - | - | - |
| 69098 | GCCCTGCCCCTCGCTGGGCACCCGCCCCAGCCCCATG | chr11:433711-433821 | 0 | 1 | 1 | 0 | 0 | - | - | - | - |
| 69161 | CTGGATGTCCAGGCT | chr11:502129-502159 | 1 | 1 | 1 | 0 | 0 | - | - | - | - |
| 69173 | GTGTGTCCTGTCCCGTGGGGGGATCAGGGCTGGGGCTACCTTGGCTGAGTCATCCCCAGTCCCAAGGCTCGTGGACCATCCCT | chr11:552260-552598 | 0 | 0 | 1 | 0 | 0 | - | - | - | - |
| 69178 | GCAGGTGAGCCCGGGGACCTGATCCCCTGTCACTCCCCCACCCCTGACGTGGGCAGATACGGGGGTCACAGGGTCCCACTCGGGAG | chr11:562772-563116 | 0 | 0 | 1 | 1 | 6 | 0 | 0 | 3 | 3 |
| 69193 | GCCCCCGCCGAGGACAGAGCCCCCCGTGAGTAAGGCCCCG | chr11:609695-609930 | 0 | 0 | 1 | 0 | 0 | - | - | - | - |
| 69199 | GGGGCATCGGCTGAGAGGTTCCTGGCTCTGGGGTCTGTGCTGTGCCCCCACCGGGTGTGGCTGGTTGGTGGGAGGTGCTGGTTCCCATACCGG | chr11:618622-618995 | 0 | 0 | 1 | 0 | 0 | - | - | - | - |
| 69200 | GGGGGCTCACCTGTGGAG | chr11:619277-619331 | 0 | 1 | 1 | 0 | 0 | - | - | - | - |
| 69205 | GGGGGCGGGTCGGGCCCG | chr11:627024-627091 | 0 | 1 | 1 | 0 | 0 | - | - | - | - |
| 69211 | GCGGGGGCATCT | chr11:637361-637432 | 0 | 1 | 1 | 0 | 0 | - | - | - | - |
| 69212 | CGCCCCCCGCGCCCGGCCTCCCCCAGGACCCCTGCGGCCCCGACTGTG | chr11:639988-640180 | 0 | 0 | 1 | 0 | 0 | - | - | - | - |
| 69241 | GCGGCCGCCGCCGCCACA | chr11:694958-695012 | 0 | 1 | 1 | 0 | 0 | - | - | - | - |
| 69246 | CCAGGTAAGGCCCCGCCC | chr11:710482-710532 | 0 | 1 | 1 | 0 | 0 | - | - | - | - |
| 69254 | GCCAGCAGGTGCAGGGGACAGGGACGGG | chr11:721683-721761 | 0 | 1 | 1 | 0 | 0 | - | - | - | - |
| 69278 | GGAGCCTCCGACCTCACCTCTGGCTGTGATGGGGGAGGACAGAGCAGGGAGCACAGCGTGCCTCGGCCTCCAGGCACTCACCCT | chr11:772177-772430 | 0 | 0 | 1 | 0 | 0 | - | - | - | - |
| 69283 | CGCTCGCCTGCCCGCCGCCG | chr11:798218-798351 | 0 | 1 | 1 | 0 | 0 | - | - | - | - |
| 69285 | GCCATGCCCTGGCCCACACACTGCCCCC | chr11:802120-802202 | 0 | 1 | 1 | 0 | 0 | - | - | - | - |
| 69297 | GCCCCGGCCCGCGCCCCACGGCGGACTCAGCCCCCA | chr11:842322-842435 | 0 | 1 | 1 | 0 | 0 | - | - | - | - |
| 69366 | GTGGTGGGCAGCTGCGGC | chr11:1020685-1020738 | 0 | 1 | 1 | 0 | 0 | - | - | - | - |
| 69429 | CACCACTCCCAGCCCTCCACCAACCACCACTCCCAGCCCTCCACCAACCACCACAACCACCCCTCCACCAAC | chr11:1092368-1093878 | 0 | 0 | 1 | 0 | 0 | - | - | - | - |
| 69438 | CCCACGCCCTCCAAGCCGACG | chr11:1095243-1095306 | 0 | 1 | 1 | 0 | 0 | - | - | - | - |
| 69441 | CCTGTGCAGTGGCCCCGGGGGCTTGGCCTGGGAGGAGCCACCCTCACGGCCGCGTGCACACCCTGTCTTCAGAGTGCAACACCAG | chr11:1101400-1101570 | 0 | 0 | 1 | 0 | 0 | - | - | - | - |
| 69522 | ATCCACCTCTGTGGC | chr11:1213637-1213697 | 0 | 1 | 1 | 0 | 0 | - | - | - | - |
| 69523 | GCCCACCACGGTCGG | chr11:1216370-1216459 | 0 | 1 | 1 | 0 | 0 | - | - | - | - |
| 69539 | AGCTCCTGGTACTTATGAACCCACCAGCCTCCGCCTGGGGTGGGGGTGTGG | chr11:1251029-1251177 | 0 | 0 | 1 | 0 | 0 | - | - | - | - |
| 69550 | TCCACCCCCTCCTCCACTCCGGGGACCACCTGGATCCTCACAGAGCTGACCACAGAAGGCCACCACAACAAGCAGCCACCAGCCCCACG | chr11:1267390-1267989 | 0 | 0 | 1 | 0 | 0 | - | - | - | - |
| 69553 | CACAGAGCTGACCACGACAGCCACCACGACTGCGGCCACCGGATCCACGGCCACCCCCTCCTCCACCCCAGGGACCACCTGGATCCT | chr11:1271198-1271880 | 0 | 0 | 1 | 0 | 0 | - | - | - | - |
| 69554 | CACAACCACCACACC | chr11:1271969-1272015 | 0 | 1 | 1 | 0 | 0 | - | - | - | - |
| 69558 | CCTGTGCGGTGAGTGGGGGCGGCCCCGGGCCCCCCAGACCCCTCGGCCTCTCTGAGTGT | chr11:1276780-1277371 | 0 | 0 | 1 | 0 | 0 | - | - | - | - |
| 69563 | ACCTGCCCCCAGGTGAGACCCGAGGC | chr11:1280279-1280594 | 0 | 0 | 1 | 0 | 0 | - | - | - | - |
| 69769 | GCGCGGGGGAGCC | chr11:1578217-1578253 | 0 | 1 | 1 | 0 | 0 | - | - | - | - |
| 69783 | GGAGCCACAGCCCCCCTTGGAGCCCCCACAAGAACCACAGCCCCCCTTGCAGCACTCCACA | chr11:1605882-1606299 | 0 | 0 | 1 | 0 | 0 | - | - | - | - |
| 69786 | GGCACACAGCAGCACACG | chr11:1606309-1606480 | 0 | 0 | 1 | 0 | 0 | - | - | - | - |
| 69792 | ACTGGCAGCACACAGGGACTTACAGCAGCTGG | chr11:1618957-1619170 | 0 | 0 | 1 | 0 | 0 | - | - | - | - |
| 69799 | GGAGCCACAGCCCCCACAGCC | chr11:1619318-1619468 | 0 | 0 | 1 | 0 | 0 | - | - | - | - |
| 69804 | ACAGCAGCTGGACTGGGAGCAGCAGGGCTT | chr11:1628928-1629366 | 0 | 0 | 1 | 0 | 0 | - | - | - | - |
| 69817 | ACAGCAGCTGGACTGGCAGCAGCAGGGATTGCAGCAACTGGACTGGCAGCAGGATGACCCACAACCTGAGGAGGAGCAGCAGGGCTT | chr11:1642666-1642931 | 0 | 0 | 1 | 0 | 0 | - | - | - | - |
| 69832 | GCTGCTGCCAGTCCAGCTGCTGTAAGCCCT | chr11:1651527-1651790 | 0 | 0 | 1 | 0 | 0 | - | - | - | - |
| 69867 | GGCTGTGGCTCCGGCTGTGGG | chr11:1718499-1718778 | 0 | 0 | 1 | 0 | 0 | - | - | - | - |
| 69895 | GCCCGCTCACCTGGAGCGTGCGGCACCCTCACC | chr11:1774958-1775053 | 0 | 1 | 1 | 0 | 0 | - | - | - | - |
| 70017 | CCAAGTGAGTGTGGGGTCCTGGCAGGCCCAGTGCCGAGTGTGTTCTGGGGTGGCGGTGG | chr11:1951054-1951231 | 0 | 0 | 1 | 0 | 0 | - | - | - | - |
| 70034 | GGATCCCCATGGAGTGAGCCCGGAAGGATTCCCGCTGGGGTTGGGAGAGCACCCTCAGGGG | chr11:1972238-1972357 | 0 | 1 | 1 | 0 | 0 | - | - | - | - |
| 70037 | GGCAGAGCAGCGACCCGCGGCGGGGCGGCATCCCCAGCTGGTTCGGGCCGTGACGGGGCGGCCAGCAGGGACGCGCCCCAGGTGGGCAGCTGT | chr11:1977597-1977783 | 0 | 0 | 1 | 0 | 0 | - | - | - | - |
| 70186 | CTGTCCCCACACCC | chr11:2182799-2183211 | 0 | 0 | 1 | 0 | 0 | - | - | - | - |
| 70265 | CCCCCACAGTGACCAGC | chr11:2329622-2329966 | 0 | 0 | 1 | 0 | 0 | - | - | - | - |
| 70309 | CTCGGCCTCACCCAGGTGCTCCCGCTTGTG | chr11:2428307-2428367 | 1 | 1 | 1 | 0 | 0 | - | - | - | - |
| 70310 | GGTGACCAGCAGGAA | chr11:2429026-2429072 | 0 | 1 | 1 | 0 | 0 | - | - | - | - |
| 70469 | CCGGGG | chr11:2906070-2906304 | 0 | 0 | 1 | 0 | 0 | - | - | - | - |
| 70506 | CCCCTCGAACCTCAAGGACCCGCCGTCCCTCAGACCCCGCGCACTGACACCCCTCAGACCCCGAGCACCCCCG | chr11:3078283-3078576 | 0 | 0 | 1 | 0 | 0 | - | - | - | - |
| 70614 | TCTCCAGTATGAATTCTCTTATGTACAGTAAGGTCTGAGAACTGGGTGAAGGCTTTGCCACATTCTTCACACTTGTAGGGTTTC | chr11:3380345-3381598 | 0 | 0 | 1 | 0 | 0 | - | - | - | - |
| 70760 | CCTTCAGGAAAGGTAAGGCCCTGCC | chr11:4091421-4091470 | 0 | 1 | 1 | 0 | 0 | - | - | - | - |
| 71123 | CTGGCG | chr11:6411930-6411979 | 0 | 1 | 1 | 0 | 0 | - | - | - | - |
| 71148 | TGTTTGTGGCATTTCTTCTTCCTTTCTACTTCTTCAGCAGAGTCACTGCAACATGAGCC | chr11:6623128-6623372 | 0 | 0 | 1 | 0 | 0 | - | - | - | - |
| 71174 | GAATGAGTGAGTAGAGAATTTTATCTGGAGCAG | chr11:6789141-6789282 | 0 | 0 | 1 | 0 | 0 | - | - | - | - |
| 71193 | TAAGGTTTCTCTCCTGTATGGACTCTCTGATGAATTCGAAGATTTGAGCTCTGACTGAAACCTTTACCACACTTAGCACATTTA | chr11:7021168-7022173 | 0 | 0 | 1 | 0 | 0 | - | - | - | - |
| 71394 | GTGGGGGAGGGGGAAGGGGAG | chr11:8662060-8662124 | 0 | 1 | 1 | 0 | 0 | - | - | - | - |
| 71613 | GAGGCCTTCAGGGTAGTACCTGTGGGGAGCTCACTCTCATCTGAAACTGTGATGGTAGAGACAGATATCGAAGAAATGATTAGCTCAAAGCAATT | chr11:9861197-9861483 | 0 | 0 | 1 | 0 | 0 | - | - | - | - |
| 72682 | GCTCCCCCGCCCTCCCTCCCTCCCACCGTCATGGAGTACTGCCCT | chr11:17548617-17548794 | 0 | 0 | 1 | 0 | 0 | - | - | - | - |
| 74442 | TCATCCACGTCTTCCTCA | chr11:27384448-27384502 | 0 | 1 | 1 | 0 | 0 | - | - | - | - |
| 74822 | CCTCCTCTT | chr11:30033813-30033888 | 0 | 1 | 1 | 0 | 0 | - | - | - | - |
| 75165 | GGCGGCGGCGGGGGT | chr11:32456487-32456531 | 0 | 1 | 1 | 0 | 0 | - | - | - | - |
| 75222 | CCCTTTAAGTAAAAAACTGTATTTCAATACTTTCCAATGTAAATAATAATACAAAGGGTAAAATATAAGAGCTCAAGAA | chr11:32720869-32721027 | 0 | 0 | 1 | 0 | 0 | - | - | - | - |
| 75386 | GGCCAGGGCGGAG | chr11:33721989-33722096 | 0 | 1 | 1 | 0 | 0 | - | - | - | - |
| 75390 | TCCTCCTCT | chr11:33763562-33763607 | 0 | 1 | 1 | 0 | 0 | - | - | - | - |
| 75492 | CCTGTGGGGCAGCAGAGAGAGGGTCAGGCCTGGGGGGGGCTC | chr11:34194853-34195023 | 0 | 0 | 1 | 0 | 0 | - | - | - | - |
| 75715 | AGCGAGTCAGAGGAAGAG | chr11:35684935-35685091 | 0 | 0 | 1 | 0 | 0 | - | - | - | - |
| 77198 | GGCGGCTGGGGCTGC | chr11:44331262-44331343 | 0 | 1 | 1 | 0 | 0 | - | - | - | - |
| 77473 | CGAGGACGACGA | chr11:45921798-45921834 | 0 | 1 | 1 | 0 | 0 | - | - | - | - |
| 77474 | GCCAGGGCCAGA | chr11:45921896-45921932 | 0 | 1 | 1 | 0 | 0 | - | - | - | - |
| 77619 | TGCCACCCTTACCTTCCTCTTAC | chr11:46903217-46903263 | 1 | 1 | 1 | 0 | 0 | - | - | - | - |
| 77732 | GGGCTAACCTGTGCCCTCTCCTCTCCCCTGTGGGGAA | chr11:47367638-47367784 | 0 | 0 | 1 | 0 | 0 | - | - | - | - |
| 79193 | TGCAAAAGAGGAGGCGGA | chr11:57310795-57310851 | 0 | 1 | 1 | 0 | 0 | - | - | - | - |
| 79203 | AACCCACCACAC | chr11:57367553-57367653 | 0 | 1 | 1 | 0 | 0 | - | - | - | - |
| 79383 | CTGCACTCACCTTGGC | chr11:58322271-58322336 | 0 | 1 | 1 | 0 | 0 | - | - | - | - |
| 79684 | ATCCCAAGATATGCA | chr11:60183568-60183674 | 0 | 1 | 1 | 0 | 0 | - | - | - | - |
| 79686 | AATCCCCAAAGAGGCAATCCTTAGATCAGCAAAGCAAAGACTGGC | chr11:60183972-60184194 | 0 | 0 | 1 | 0 | 0 | - | - | - | - |
| 79696 | TGTTCTTGGTAAG | chr11:60233622-60233648 | 1 | 1 | 1 | 0 | 0 | - | - | - | - |
| 79813 | CCCCTGCTCTCCACATCCAG | chr11:60703606-60703663 | 0 | 1 | 1 | 0 | 0 | - | - | - | - |
| 79814 | GAGGAGGAAGCCAGGGAGGAG | chr11:60703749-60703812 | 0 | 1 | 1 | 0 | 0 | - | - | - | - |
| 80002 | TGGCCCA | chr11:61546700-61546741 | 0 | 1 | 1 | 0 | 0 | - | - | - | - |
| 80015 | CTGGGCGAATGGCAGACCATCGAGGTACGACTAAGGGGATGGTGTTGACCTAGGAAGTGTTTGGC | chr11:61615732-61615926 | 0 | 0 | 1 | 0 | 0 | - | - | - | - |
| 80068 | GAGCAGGAGCGGCGC | chr11:61914234-61914363 | 0 | 1 | 1 | 0 | 0 | - | - | - | - |
| 80174 | TTGATGTCAGCTTCTGGGCCC | chr11:62287594-62287653 | 0 | 1 | 1 | 0 | 0 | - | - | - | - |
| 80181 | ATCTTGGGCATCTTT | chr11:62293567-62293597 | 0 | 1 | 1 | 0 | 0 | - | - | - | - |
| 80183 | ACTTCGGGCCCCTTGAGGTCA | chr11:62294029-62294071 | 0 | 1 | 1 | 0 | 0 | - | - | - | - |
| 80189 | TAATGTCAACATCTGGGCACTT | chr11:62297789-62297831 | 0 | 1 | 1 | 0 | 0 | - | - | - | - |
| 80190 | TGGGGCCACTGACATCAACTT | chr11:62300043-62300105 | 0 | 1 | 1 | 0 | 0 | - | - | - | - |
| 80383 | GCGGAGGCGGGG | chr11:63531207-63531256 | 0 | 1 | 1 | 0 | 0 | - | - | - | - |
| 80420 | TTTTTTTTTTTGTC | chr11:63673507-63673568 | 0 | 1 | 1 | 0 | 0 | - | - | - | - |
| 80505 | GCGGGCGCCCCCG | chr11:64002270-64002308 | 0 | 1 | 1 | 0 | 0 | - | - | - | - |
| 80506 | GGATGCAGGTACTGGGCAGGTGGGGCAACGGGCAGG | chr11:64003473-64003621 | 0 | 0 | 1 | 0 | 0 | - | - | - | - |
| 80512 | GGCTGAGGCCAGGTGCC | chr11:64032938-64033009 | 0 | 1 | 1 | 0 | 0 | - | - | - | - |
| 80535 | GCAGTGTGAGTGTGGGCCCACAGTGGGCCCTGGGGGGGTGCCCCGT | chr11:64118722-64118913 | 0 | 0 | 1 | 0 | 0 | - | - | - | - |
| 80536 | TCCTCTGACCCCCTCCCTGCATGAGCCTCAGCCCCCCTCCCC | chr11:64122132-64122678 | 0 | 0 | 1 | 0 | 0 | - | - | - | - |
| 80540 | CGCCTT | chr11:64135906-64135950 | 0 | 1 | 1 | 0 | 0 | - | - | - | - |
| 80623 | GTGGTGGTAGTCGCCATG | chr11:64390267-64390318 | 0 | 1 | 1 | 0 | 0 | - | - | - | - |
| 80625 | CAGCAGCAA | chr11:64410140-64410176 | 0 | 1 | 1 | 0 | 0 | - | - | - | - |
| 80626 | GGTGGAGGCGGCGGC | chr11:64410180-64410240 | 0 | 1 | 1 | 0 | 0 | - | - | - | - |
| 80668 | GCGGCGGCGGCGGAGGCGGCG | chr11:64545545-64545741 | 0 | 0 | 1 | 0 | 0 | - | - | - | - |
| 80681 | CTCACCCAC | chr11:64603844-64603902 | 0 | 1 | 1 | 0 | 0 | - | - | - | - |
| 80683 | GGGGTTGGGCAGGGCAGC | chr11:64607539-64607592 | 0 | 1 | 1 | 0 | 0 | - | - | - | - |
| 80801 | TGCCCCAGCCCAACTGAGCAGCTCTCCC | chr11:65161655-65161738 | 0 | 1 | 1 | 0 | 0 | - | - | - | - |
| 80853 | GGGCAGCTGAATGTCTCTCCTGGCC | chr11:65393066-65393140 | 0 | 1 | 1 | 0 | 0 | - | - | - | - |
| 80856 | CCTCAG | chr11:65404247-65404303 | 0 | 1 | 1 | 0 | 0 | - | - | - | - |
| 80859 | GGCTGGAGCCAGGGGCAGG | chr11:65422310-65422383 | 0 | 1 | 1 | 0 | 0 | - | - | - | - |
| 80948 | TGATGACGGGACCAGCCACGGTGGGGGACTTGG | chr11:65793155-65793221 | 0 | 1 | 1 | 0 | 0 | - | - | - | - |
| 80954 | GCAGCAGCCGCC | chr11:65838046-65838094 | 0 | 1 | 1 | 0 | 0 | - | - | - | - |
| 81012 | CCAGCCCCTTCACCGCCAGG | chr11:66103201-66103239 | 0 | 1 | 1 | 0 | 0 | - | - | - | - |
| 81072 | GGCTCCTCAAGCTGAG | chr11:66334872-66334919 | 0 | 1 | 1 | 0 | 0 | - | - | - | - |
| 81092 | GTGGGGTGTCTTCCCAG | chr11:66358461-66358493 | 0 | 1 | 1 | 0 | 0 | - | - | - | - |
| 81215 | CAGGGG | chr11:67079235-67079272 | 0 | 1 | 1 | 0 | 0 | - | - | - | - |
| 81232 | GACTGTGGCTGGGCCATGAGGGTTCAGCTGTGGCTGAGCTGTGGGATCC | chr11:67218996-67219239 | 0 | 0 | 1 | 0 | 0 | - | - | - | - |
| 81249 | GCGAGGGGCAAGGGCAGGTGAGCTGGAGG | chr11:67289911-67290027 | 0 | 1 | 1 | 0 | 0 | - | - | - | - |
| 81406 | TGCAGGAGGTGGGTGCCCCCGGCCTCCAGGAGGTGGG | chr11:67811366-67811563 | 0 | 0 | 1 | 0 | 0 | - | - | - | - |
| 81417 | GCGGGCGGCTGCGGCA | chr11:67888408-67888616 | 0 | 0 | 1 | 0 | 0 | - | - | - | - |
| 81440 | TGGAGGCCACAGTCATACTGGAGGCCGCAGTCGTGGGAGCAA | chr11:68029987-68030194 | 0 | 0 | 1 | 0 | 0 | - | - | - | - |
| 81496 | GCCGGGGAGGGGCGGG | chr11:68207380-68207429 | 0 | 1 | 1 | 0 | 0 | - | - | - | - |
| 82292 | GCTAGCAAGGT | chr11:70785628-70785650 | 1 | 1 | 1 | 0 | 0 | - | - | - | - |
| 82473 | GCTGCTCCCAGTCCAGCTGCTATAAGCCCTGCTGCTGCTCCTCAGGCTGTGGGTCATCCTGCTGCCAGTCCAGCTGCTGCAAGCCCT | chr11:71238617-71238885 | 0 | 0 | 1 | 0 | 0 | - | - | - | - |
| 82483 | GCTGTTCCCAGTCCAGCTGCTGTAAGCCCTGCTGCTGCTCTTCAGGCTGTGGGTCATCCTGCTGCCAGTCCAGCTGCTGCAAGCCCT | chr11:71249351-71249702 | 0 | 0 | 1 | 0 | 0 | - | - | - | - |
| 82488 | GGCTGTGGCTCCAGCTGTGG | chr11:71259727-71259812 | 0 | 1 | 1 | 0 | 0 | - | - | - | - |
| 82489 | CTGCTCCCAGTGCAGCTGCTGCAAGCCCTGCTGCTCCTCCTCAGGCTCGTGGGTCATCCTGCTGCCAATCCAGCTGCTGCAAGCCCTA | chr11:71259930-71260190 | 0 | 0 | 1 | 0 | 0 | - | - | - | - |
| 82501 | CTGCTGCCAGTCCAGCTGCTGCAATCCCTG | chr11:71277100-71277249 | 0 | 0 | 1 | 0 | 0 | - | - | - | - |
| 82528 | CAGCAGCTGGACTGG | chr11:71293443-71293635 | 0 | 0 | 1 | 0 | 0 | - | - | - | - |
| 82713 | TTGACATCTGCACCTTCTGACAACAGCCTAAAACAAGACAGAGGAATATTTTCAGTGTATGGC | chr11:72114069-72114195 | 1 | 1 | 1 | 0 | 0 | - | - | - | - |
| 82756 | CCCTGC | chr11:72308511-72308553 | 0 | 1 | 1 | 0 | 0 | - | - | - | - |
| 83239 | CCCGCGCCCGCCGCG | chr11:74953173-74953257 | 0 | 1 | 1 | 0 | 0 | - | - | - | - |
| 83282 | AGGAACTTGATTCTTCAGAGGCACAGGGACTAT | chr11:75298259-75298490 | 0 | 0 | 1 | 0 | 0 | - | - | - | - |
| 83283 | ACCTTGATCCTTGACAGGTGCTGAGACCATGGGACCTTGATCCTTGACAGGTGCTGAGGCCATGGGACCTTCATCCTTGACAGGTGCTGGGACCATGGG | chr11:75298526-75299227 | 0 | 0 | 1 | 0 | 0 | - | - | - | - |
| 83554 | AGGTCCCCGCAGGAGGAG | chr11:76750697-76750733 | 0 | 1 | 1 | 0 | 0 | - | - | - | - |
| 83598 | AGCCTACAAATTCTCAGGTACCCCGCAGCCTGCAATGCTCCCAGTCCCTTGCTCTGTAGCTCCAGCCCAC | chr11:76908626-76908836 | 0 | 0 | 1 | 0 | 0 | - | - | - | - |
| 83781 | CCTGGTAAGGCCCCTGCCTGCTGCC | chr11:77911276-77911378 | 0 | 1 | 1 | 0 | 0 | - | - | - | - |
| 84541 | CTTACGAGTTCC | chr11:82708236-82708274 | 0 | 1 | 1 | 0 | 0 | - | - | - | - |
| 84572 | GGTGGTCTGAGGTTTGAGGGACCATCGAGGTCAGCCTGTG | chr11:82879957-82880460 | 0 | 0 | 1 | 0 | 0 | - | - | - | - |
| 84771 | GGTCCTGTTTGAAGCTGGACCCCCC | chr11:84027972-84028021 | 0 | 1 | 1 | 0 | 0 | - | - | - | - |
| 84947 | AGGTGAAATTTATTATT | chr11:85340304-85340359 | 0 | 1 | 1 | 0 | 0 | - | - | - | - |
| 86450 | GCTACGGACGGCGGAGCCGCA | chr11:94800727-94800790 | 0 | 1 | 1 | 0 | 0 | - | - | - | - |
| 86452 | CAGCCGATCTCGCTA | chr11:94800824-94801018 | 0 | 0 | 1 | 0 | 0 | - | - | - | - |
| 86609 | GTTGTTGCTGCTGCTGCTGCTGCTGCTGTTGCTGCT | chr11:95825198-95825423 | 0 | 0 | 1 | 0 | 0 | - | - | - | - |
| 86610 | GCTGGTGCTGCT | chr11:95825822-95825894 | 0 | 1 | 1 | 0 | 0 | - | - | - | - |
| 86640 | ATCATCCTCTATTATTTGTCCAGTTTGTTTGTTGAGATCATTATCCTCTTGACTTAAATGTTTTTCCTG | chr11:96117398-96117536 | 1 | 1 | 1 | 0 | 0 | - | - | - | - |
| 86641 | ACTATCAAGCTCTTCATC | chr11:96117704-96117808 | 0 | 1 | 1 | 0 | 0 | - | - | - | - |
| 87490 | AATACGGGAAATACCTCA | chr11:101773320-101773355 | 0 | 1 | 1 | 0 | 0 | - | - | - | - |
| 87725 | TCTTGAGAGTTTGTATTTAGTTATTCCTGA | chr11:103106534-103106594 | 1 | 1 | 1 | 0 | 0 | - | - | - | - |
| 88902 | ACGTTCCATTAGCTCTTCCTTTTC | chr11:110118467-110118512 | 0 | 1 | 1 | 0 | 0 | - | - | - | - |
| 89117 | GGCCGTGCTGCT | chr11:111411591-111411652 | 0 | 1 | 1 | 0 | 0 | - | - | - | - |
| 89149 | ACCTGCAATTCCCTCATCTGCCCTTTTACTTACCTGATGATG | chr11:111731194-111731278 | 0 | 1 | 1 | 0 | 0 | - | - | - | - |
| 89532 | GAGATGGATAAATTTAGAGCAGATCCAAACCTGAAATGACAGCAAATGTAACAT | chr11:114453714-114453820 | 0 | 1 | 1 | 0 | 0 | - | - | - | - |
| 89922 | CCTCCTTGGGGGAGAAGTGTCTGAGAGAATCATGACGGAC | chr11:116633689-116633950 | 0 | 0 | 1 | 0 | 0 | - | - | - | - |
| 89934 | CTGCTCCTGCTG | chr11:116691612-116691660 | 0 | 1 | 1 | 0 | 0 | - | - | - | - |
| 89942 | TTGCTGTTGCTGCTG | chr11:116728997-116729042 | 0 | 1 | 1 | 0 | 0 | - | - | - | - |
| 90125 | TGACCTGGCGGATGA | chr11:117789247-117789547 | 0 | 0 | 1 | 0 | 0 | - | - | - | - |
| 90172 | ATGATAAAAACATAGGCAGTGATGAGG | chr11:118183413-118183467 | 0 | 1 | 1 | 0 | 0 | - | - | - | - |
| 90301 | GTTCAT | chr11:118772096-118772151 | 0 | 1 | 1 | 0 | 0 | - | - | - | - |
| 90302 | CGCCCC | chr11:118774002-118774026 | 1 | 1 | 1 | 0 | 0 | - | - | - | - |
| 90388 | GCCGTCGCG | chr11:119210936-119211000 | 0 | 1 | 1 | 0 | 0 | - | - | - | - |
| 90517 | CTGCTGCTGCCG | chr11:120082018-120082104 | 0 | 1 | 1 | 0 | 0 | - | - | - | - |
| 91345 | GCCGGAGCCAGA | chr11:124750439-124750489 | 0 | 1 | 1 | 0 | 0 | - | - | - | - |
| 91360 | GCTGGGGAGCGC | chr11:124791175-124791252 | 0 | 1 | 1 | 0 | 0 | - | - | - | - |
| 91369 | AGGAACCTGACTATG | chr11:124856635-124856683 | 0 | 1 | 1 | 0 | 0 | - | - | - | - |
| 91370 | CAGGATTATTCTGCCAGAAGCC | chr11:124857097-124857371 | 0 | 0 | 1 | 0 | 0 | - | - | - | - |
| 91373 | AGAGACCAGCATGTTCTCCCCAAAGACCAAGATATTCTACCAAAATATCAGGACCAGAATTTTCTACCTAAGGACCAGAATTTTTTATCT | chr11:124857475-124858043 | 0 | 0 | 1 | 0 | 0 | - | - | - | - |
| 91505 | CACCTGAAGCCTGTT | chr11:125547715-125548075 | 0 | 0 | 1 | 0 | 0 | - | - | - | - |
| 91573 | GCTCCCAGGTGCCAGGATGCTCCCAGGGTCTTCACTGT | chr11:126073243-126073319 | 0 | 1 | 1 | 0 | 0 | - | - | - | - |
| 91624 | ATCCTCCCCTCTACCTAACCCCCCAGCCCCTCCACCAGCCCCCCACC | chr11:126342823-126343204 | 0 | 0 | 1 | 0 | 0 | - | - | - | - |
| 92204 | GAAGAG | chr11:129991634-129991688 | 0 | 1 | 1 | 0 | 0 | - | - | - | - |
| 92866 | ACACTCACTTGTGAGATGAGCTTGGGGGAGCTGC | chr11:134034436-134037917 | 0 | 0 | 1 | 0 | 0 | - | - | - | - |
| 92905 | GGGAGGTGAGTGCTGGGGGCAGTCGTCGGCA | chr11:134240288-134240411 | 0 | 1 | 1 | 0 | 0 | - | - | - | - |
| 92950 | CTCCTCCATCAGGAGATGGTCACTCCCCTCCTGGTCTATACCCGTGGGATT | chr11:134356918-134357689 | 0 | 0 | 1 | 0 | 0 | - | - | - | - |
| 93120 | TCAGAGGCTGCAGTGGAGACCCAGCTTGCAGTCCA | chr11:134855415-134856465 | 0 | 0 | 1 | 0 | 0 | - | - | - | - |
| 93207 | TCTTTGAGAACCAGTGTAAG | chr12:274684-274744 | 0 | 1 | 1 | 0 | 0 | - | - | - | - |
| 93300 | CACCAATGACCACCAGCAGGA | chr12:675112-675154 | 0 | 1 | 1 | 0 | 0 | - | - | - | - |
| 93736 | GCTCAGCAGGGACTCAG | chr12:2791148-2791182 | 0 | 1 | 1 | 0 | 0 | - | - | - | - |
| 93767 | CCACAGCATGCTGCAGGAGCTGGGCGTGGGTGAGTCCCAGAAAAGCCAGTGGCCCGAGTGCCCAGGAGAC | chr12:2933080-2933220 | 0 | 1 | 1 | 0 | 0 | - | - | - | - |
| 94126 | CGGACCCGGGAGTGCGGCCCTTGCCTCCGCTGC | chr12:5153491-5153557 | 0 | 1 | 1 | 0 | 0 | - | - | - | - |
| 94394 | CCTGCTCCTCCAGCTTGTTCCCCTTCATGAGCCCTGGAGTGGACTGCAGAGGGCTAGAGT | chr12:6483861-6484041 | 0 | 0 | 1 | 0 | 0 | - | - | - | - |
| 94453 | GGCCTG | chr12:6777125-6777199 | 0 | 1 | 1 | 0 | 0 | - | - | - | - |
| 94475 | GGAGCCGGAGCAAGAACCGGAGCC | chr12:6887477-6887549 | 0 | 1 | 1 | 0 | 0 | - | - | - | - |
| 94528 | GAGCGCGAACGCGAGAAA | chr12:7047170-7047222 | 0 | 1 | 1 | 0 | 0 | - | - | - | - |
| 94531 | GACGCGGGAAGGCGGGTCA | chr12:7053805-7053859 | 0 | 1 | 1 | 0 | 0 | - | - | - | - |
| 94582 | GCCTCTGAGGCAGTGAGTGTTCTTGAGGTGGAAAGCCCAGGTGCA | chr12:7343108-7343243 | 0 | 1 | 1 | 0 | 0 | - | - | - | - |
| 94803 | CAGCAGCAGCAGCCACAGCCACCTCAACAGCAGTCACCAG | chr12:8200530-8200645 | 0 | 1 | 1 | 0 | 0 | - | - | - | - |
| 94826 | ACTCACACGGGAGAGAGACCATATGAAGTGTCATCAATGTGGAAAAGCCTTCACTCAATCCTTCTAACCTTAGAAGACATGAGAAA | chr12:8329852-8330272 | 0 | 0 | 0 | 1 | 22 | 3 | 6 | 0 | 0 |
| 95008 | CAGCAGCAA | chr12:9085325-9085380 | 0 | 1 | 1 | 0 | 0 | - | - | - | - |
| 95255 | AAAGAATAGGAAACTGACAAGAGAGGCATCAA | chr12:10312895-10312959 | 0 | 1 | 1 | 0 | 0 | - | - | - | - |
| 95374 | GGGGTGGACCTTGCTGATGGCCTCCCTGTTGGGGTGGTCCTTGTGGCCTTCCCTGAGGA | chr12:11034916-11035208 | 0 | 0 | 1 | 0 | 0 | - | - | - | - |
| 95382 | CCTCCTCAAGGAAGGCCACAAGGACCACCCCAACAGGGAGGCCATCCCCCT | chr12:11083415-11083630 | 0 | 0 | 1 | 0 | 0 | - | - | - | - |
| 95428 | GGTGGGGGACCTTGGGACTGGTTTCCTCCTTGTGGGGGTGGTCCTTCTGGCTTTCCCGGACGA | chr12:11420334-11421090 | 0 | 0 | 1 | 1 | 40 | 40 | 0 | 10 | 12 |
| 95433 | TGGGGGTGGTCCTTCTGGCTTTCCTGGAGGAGGTGGGGGACCTTGGGACTGGTTTCCTCCTTG | chr12:11461292-11461857 | 0 | 0 | 1 | 0 | 0 | - | - | - | - |
| 95442 | GTGGGGGTGGTCCTTGTGGCTTTCCTGGAG | chr12:11506606-11506879 | 0 | 0 | 1 | 0 | 0 | - | - | - | - |
| 95451 | GGAGATGGGGGACCTTGAGGCTTGTTGCCTCCTTGTGGGGGTGGTCCTTGTGGCTTTCCTGGA | chr12:11545863-11546916 | 0 | 0 | 1 | 0 | 0 | - | - | - | - |
| 95629 | GCACGCTGG | chr12:12630665-12630692 | 1 | 1 | 1 | 0 | 0 | - | - | - | - |
| 96009 | CCTCTGGTGATGCCA | chr12:14577297-14577656 | 0 | 0 | 1 | 0 | 0 | - | - | - | - |
| 96094 | CAACTTCTGCAG | chr12:15091360-15091384 | 1 | 1 | 1 | 0 | 0 | - | - | - | - |
| 96837 | GAGGAGGAGGAGGAA | chr12:19592741-19592801 | 0 | 1 | 1 | 0 | 0 | - | - | - | - |
| 96838 | GGAGGAGGAAGACGA | chr12:19592914-19592991 | 0 | 1 | 1 | 0 | 0 | - | - | - | - |
| 97279 | GAATTGTTCCTCCTCATG | chr12:21918741-21918794 | 0 | 1 | 1 | 0 | 0 | - | - | - | - |
| 97602 | CCTGAAAGAGAAAGCAAAAGGACAAATAATTGTTTA | chr12:23999126-23999234 | 0 | 1 | 1 | 0 | 0 | - | - | - | - |
| 97718 | GTATCCTCTATTTTCCATT | chr12:24970904-24970942 | 1 | 1 | 1 | 0 | 0 | - | - | - | - |
| 97926 | CGCGGCGGC | chr12:26275214-26275304 | 0 | 1 | 1 | 0 | 0 | - | - | - | - |
| 100028 | ACCATCAGCTGAAGGATCAGGGACAACTGG | chr12:40873065-40873716 | 0 | 0 | 1 | 0 | 0 | - | - | - | - |
| 100031 | AGGATCAGAGGCAACTGGACCATCAGTCAT | chr12:40873878-40874060 | 0 | 0 | 1 | 0 | 0 | - | - | - | - |
| 100032 | ATCAGCTGGAGTGACTGGGACAACTGGACA | chr12:40874226-40874405 | 0 | 0 | 1 | 0 | 0 | - | - | - | - |
| 100033 | GCTGGAGTAACAGGGACATCTGAAAAATCA | chr12:40874527-40875247 | 0 | 0 | 1 | 0 | 0 | - | - | - | - |
| 100035 | GACAACTGGACCATCAGCTAGGAGTGACAG | chr12:40875378-40875614 | 0 | 0 | 1 | 0 | 0 | - | - | - | - |
| 100036 | CAGGGACAACTGGACCATCAGCTGGAGTGA | chr12:40876394-40885134 | 0 | 0 | 1 | 0 | 0 | - | - | - | - |
| 100369 | GCAGCCCCC | chr12:42839863-42839908 | 0 | 1 | 1 | 0 | 0 | - | - | - | - |
| 100887 | AAAACATTCCAAATCAT | chr12:46246026-46246058 | 0 | 1 | 1 | 0 | 0 | - | - | - | - |
| 100900 | GTTTCACTGTACAAAGA | chr12:46328266-46328299 | 0 | 1 | 1 | 0 | 0 | - | - | - | - |
| 101250 | CACCAGGTT | chr12:48389497-48389525 | 0 | 1 | 1 | 0 | 0 | - | - | - | - |
| 101251 | GACCAGGGG | chr12:48391396-48391450 | 0 | 1 | 1 | 0 | 0 | - | - | - | - |
| 101487 | CTGCTGCTGCTGCTGCTGCTGTTGAAG | chr12:49426565-49426934 | 0 | 0 | 1 | 0 | 0 | - | - | - | - |
| 101492 | TGCTGCTGCTGTTGTTGCTGC | chr12:49427649-49427711 | 0 | 1 | 1 | 0 | 0 | - | - | - | - |
| 101493 | TCAGGCCGGGGGGACAGGTGTGGCTCC | chr12:49444871-49445627 | 0 | 0 | 1 | 1 | 40 | 40 | 0 | 20 | 20 |
| 101500 | GCAATGCCTCAGGTGGTGGGGACGCGG | chr12:49446015-49446148 | 0 | 1 | 1 | 0 | 0 | - | - | - | - |
| 101576 | ACCAGAGCCCTGCCCTCCAGCAGAACCCAGGCCCCTAGAGTCCTACTGTAGGAGTGAGCCTGAGATACCGGAGTCCTCTCGCCAGGAACAGCTTGAGGT | chr12:49724160-49724648 | 0 | 0 | 1 | 0 | 0 | - | - | - | - |
| 101635 | TGCGCCTGC | chr12:49937985-49938012 | 1 | 1 | 1 | 0 | 0 | - | - | - | - |
| 101647 | GCCACAGCCACCTCA | chr12:50027686-50027733 | 0 | 1 | 1 | 0 | 0 | - | - | - | - |
| 101736 | AAGGAGGCCAGTGAGG | chr12:50467508-50467539 | 0 | 1 | 1 | 0 | 0 | - | - | - | - |
| 101787 | CCCAGAGCCTGGGCCTGCTGAGGGGTGAGAGGGATC | chr12:50745671-50747400 | 0 | 0 | 1 | 0 | 0 | - | - | - | - |
| 101921 | TGCTGCTGCTGCTGT | chr12:51493469-51493517 | 0 | 1 | 1 | 0 | 0 | - | - | - | - |
| 102020 | GCTACAGCG | chr12:52115531-52115558 | 0 | 1 | 1 | 0 | 0 | - | - | - | - |
| 102028 | CGCCGTCAGCCCCCG | chr12:52214612-52214701 | 0 | 1 | 1 | 0 | 0 | - | - | - | - |
| 102039 | GGCCCA | chr12:52284539-52284563 | 1 | 1 | 1 | 0 | 0 | - | - | - | - |
| 102044 | GACCCCCTCTCCTCTGCATCTCTCTCCC | chr12:52314446-52314561 | 0 | 1 | 1 | 0 | 0 | - | - | - | - |
| 102063 | CTCCTCAGCCTC | chr12:52448345-52448405 | 0 | 1 | 1 | 0 | 0 | - | - | - | - |
| 102152 | CAAGACCTCCACCGAGGCCACCGC | chr12:52908925-52908973 | 0 | 1 | 1 | 0 | 0 | - | - | - | - |
| 102171 | CCAAAGCCACCAGGACCCCCAAAACCT | chr12:53045501-53045704 | 0 | 0 | 1 | 0 | 0 | - | - | - | - |
| 102177 | CCAGAGCTCCCGCCG | chr12:53069082-53069307 | 0 | 0 | 1 | 0 | 0 | - | - | - | - |
| 102181 | CCACCACCACCAAAG | chr12:53073719-53073984 | 0 | 0 | 1 | 0 | 0 | - | - | - | - |
| 102202 | CTGGGAGGA | chr12:53183840-53183867 | 0 | 1 | 1 | 0 | 0 | - | - | - | - |
| 102215 | CCTGCTGCTGAAGCCGCC | chr12:53242597-53242647 | 0 | 1 | 1 | 0 | 0 | - | - | - | - |
| 102265 | CTCTTC | chr12:53460130-53460181 | 0 | 1 | 1 | 0 | 0 | - | - | - | - |
| 102366 | CACAAGCAC | chr12:53837515-53837551 | 0 | 1 | 1 | 0 | 0 | - | - | - | - |
| 102475 | GAGGAAGAAAGAAGAGGAGGAA | chr12:54405102-54405165 | 0 | 1 | 1 | 0 | 0 | - | - | - | - |
| 102596 | TGCTGAAACCACTGC | chr12:55250581-55250659 | 0 | 1 | 1 | 0 | 0 | - | - | - | - |
| 102822 | CTGTATCCATGGCTCCTGTGG | chr12:56515487-56515529 | 0 | 1 | 1 | 0 | 0 | - | - | - | - |
| 102866 | CTCCTCCTCTTC | chr12:56817423-56817474 | 0 | 1 | 1 | 0 | 0 | - | - | - | - |
| 102918 | GCTGGAGAGACAACTGTAGAAGACT | chr12:57005756-57005928 | 0 | 0 | 1 | 0 | 0 | - | - | - | - |
| 103147 | CTTCCTCCACCACCCTCAGCAC | chr12:57920734-57920777 | 0 | 1 | 1 | 0 | 0 | - | - | - | - |
| 103162 | CTCTGGCCCCAG | chr12:58006779-58006815 | 0 | 1 | 1 | 0 | 0 | - | - | - | - |
| 103190 | GAGGAT | chr12:58112042-58112078 | 0 | 1 | 1 | 0 | 0 | - | - | - | - |
| 103191 | GCTGGGCGTGGTGGCCGC | chr12:58120415-58120451 | 1 | 1 | 1 | 0 | 0 | - | - | - | - |
| 104228 | ATCAGTGCAGAGAGC | chr12:64436591-64436620 | 0 | 1 | 1 | 0 | 0 | - | - | - | - |
| 104428 | CCTCTCCCTCTG | chr12:65672577-65672613 | 0 | 1 | 1 | 0 | 0 | - | - | - | - |
| 104517 | ATTTTTCTTTCTGCTGCC | chr12:66260646-66260699 | 0 | 1 | 1 | 0 | 0 | - | - | - | - |
| 104623 | TGAAGTTCCAGCTGGATCAGGATCAGGT | chr12:66704030-66704084 | 0 | 1 | 1 | 0 | 0 | - | - | - | - |
| 105017 | CGTGACCGAGAG | chr12:69656282-69656318 | 0 | 1 | 1 | 0 | 0 | - | - | - | - |
| 105459 | GGCGGCGGCGGCGG | chr12:72148924-72148952 | 1 | 1 | 1 | 0 | 0 | - | - | - | - |
| 106060 | GGAGGAGGAAAAACAAGAGAGAAAGAGGA | chr12:75824865-75824955 | 0 | 1 | 1 | 0 | 0 | - | - | - | - |
| 106154 | GGTGAGGATGCGGGTGCG | chr12:76424395-76424613 | 0 | 0 | 1 | 0 | 0 | - | - | - | - |
| 106160 | GCTGCTGTTGCTGCTGCTGCT | chr12:76424908-76424972 | 0 | 1 | 1 | 0 | 0 | - | - | - | - |
| 106858 | TCTTCTCCTTCTTTCTCC | chr12:80189502-80189537 | 0 | 1 | 1 | 0 | 0 | - | - | - | - |
| 106859 | TTTTCTTCTTTTCCTCTTTATCT | chr12:80191038-80191109 | 0 | 1 | 1 | 0 | 0 | - | - | - | - |
| 107017 | TGAAACAGGTAACTAACA | chr12:80943505-80943559 | 0 | 1 | 1 | 0 | 0 | - | - | - | - |
| 108280 | AAAATTTTCAATACCTGTAAC | chr12:88504943-88504985 | 1 | 1 | 1 | 0 | 0 | - | - | - | - |
| 108735 | GCTCCTCCTCTTCCA | chr12:91347486-91347693 | 0 | 0 | 1 | 0 | 0 | - | - | - | - |
| 110026 | CTGTTGTTCAGTATATC | chr12:99007978-99008011 | 0 | 1 | 1 | 0 | 0 | - | - | - | - |
| 110619 | CTTCTGTTCCCCTC | chr12:102811684-102811711 | 0 | 1 | 1 | 0 | 0 | - | - | - | - |
| 110832 | GAAGACACAGCA | chr12:104341115-104341174 | 0 | 1 | 1 | 0 | 0 | - | - | - | - |
| 111027 | GACAGTTCAGAA | chr12:105388300-105388348 | 0 | 1 | 1 | 0 | 0 | - | - | - | - |
| 111255 | CTGCGGGTGCTG | chr12:106641449-106641530 | 0 | 1 | 1 | 0 | 0 | - | - | - | - |
| 111690 | GCCTCCGTGGCTGCTGGTGGAGTGGTCTGT | chr12:109017301-109017786 | 0 | 0 | 1 | 0 | 0 | - | - | - | - |
| 111779 | ACCCACACCTGGGCCTATACCCACACCTGCCTG | chr12:109313146-109313453 | 0 | 0 | 1 | 0 | 0 | - | - | - | - |
| 111898 | CAGGCCAAGACGGCTCCC | chr12:110011231-110011309 | 0 | 1 | 1 | 0 | 0 | - | - | - | - |
| 112333 | GGCAGGGATGGGACCGGGGCCAGGGCAGAA | chr12:111800713-111800833 | 0 | 1 | 1 | 0 | 0 | - | - | - | - |
| 112345 | TCCCTTCCTCACTGGGATTCAGAG | chr12:111885815-111885863 | 0 | 1 | 1 | 0 | 0 | - | - | - | - |
| 112373 | CCGCCGCCCCGCCCGCT | chr12:112037190-112037224 | 0 | 1 | 1 | 0 | 0 | - | - | - | - |
| 112498 | CCCAGGCTG | chr12:112622111-112622177 | 0 | 1 | 1 | 0 | 0 | - | - | - | - |
| 112687 | CGCCTGCGCCGC | chr12:113515458-113515504 | 0 | 1 | 1 | 0 | 0 | - | - | - | - |
| 112712 | GCTGAAGCTGCTCGGCCCCGCCCCCAGCACCAGGTCCCACTTATTGGAGATGCTGCT | chr12:113599287-113599707 | 0 | 0 | 1 | 0 | 0 | - | - | - | - |
| 112714 | GGCATGGAGGGGCGGCTCACTCGATCACTCACCCCG | chr12:113600371-113600740 | 0 | 0 | 1 | 0 | 0 | - | - | - | - |
| 112724 | CCTTGCCCTTCT | chr12:113633390-113633462 | 0 | 1 | 1 | 0 | 0 | - | - | - | - |
| 112805 | GTGAGGTGTGTGGGAAGGAGGGAAGAA | chr12:113865961-113866041 | 0 | 1 | 1 | 0 | 0 | - | - | - | - |
| 113705 | TTACTATACCTATA | chr12:117611960-117612021 | 0 | 1 | 1 | 0 | 0 | - | - | - | - |
| 114187 | CCGGAG | chr12:119594416-119594521 | 0 | 1 | 1 | 0 | 0 | - | - | - | - |
| 114411 | GGCAGCAGCCACAAA | chr12:120634677-120634707 | 0 | 1 | 1 | 0 | 0 | - | - | - | - |
| 114525 | ACAACAAGGCTGATAATGC | chr12:121157779-121157816 | 0 | 1 | 1 | 0 | 0 | - | - | - | - |
| 114708 | AGCTCCTTGCTC | chr12:121880382-121880418 | 0 | 1 | 1 | 0 | 0 | - | - | - | - |
| 114897 | GGAGAAAGACAAGAAAGGGAAA | chr12:122685143-122685206 | 0 | 1 | 1 | 0 | 0 | - | - | - | - |
| 114967 | TCCCTGCTTCTGGATCTCGATTTCTTCCGC | chr12:123001863-123001981 | 0 | 1 | 1 | 0 | 0 | - | - | - | - |
| 114984 | ATTCTATAGATTAGAAGTCTG | chr12:123106938-123107020 | 0 | 1 | 1 | 0 | 0 | - | - | - | - |
| 115039 | GGCGGCG | chr12:123320189-123320247 | 0 | 1 | 1 | 0 | 0 | - | - | - | - |
| 115067 | TCCTCCTCTTCT | chr12:123466185-123466246 | 0 | 1 | 1 | 0 | 0 | - | - | - | - |
| 115069 | AAGAAGAGGAAGAAGAAG | chr12:123466284-123466341 | 0 | 1 | 1 | 0 | 0 | - | - | - | - |
| 115070 | GCCACCACCACTGCC | chr12:123480093-123480156 | 0 | 1 | 1 | 0 | 0 | - | - | - | - |
| 115083 | CGACCCACCCTCACCCCA | chr12:123519015-123519067 | 0 | 1 | 1 | 0 | 0 | - | - | - | - |
| 115178 | CTCCAGGCGCAGGCTCGTCCAG | chr12:124017759-124017849 | 0 | 1 | 1 | 0 | 0 | - | - | - | - |
| 115321 | CAGAGAGTCCACACAGGAGAGAAACCCTATAAATGTGATGAGTGTGGGAAGGCCTTCAGTCAGAGTTCGAGCCTCTGCATCCAC | chr12:124497090-124497511 | 0 | 0 | 1 | 0 | 0 | - | - | - | - |
| 115422 | CCACCCACCCATCCATCCACCCACCCAGCTAACCCAGCCATCTATCCTCTCACCCACCCACCTACCTACCTAACCCACCAC | chr12:124823443-124824554 | 0 | 0 | 1 | 0 | 0 | - | - | - | - |
| 115426 | TCCCGCTCCCGATCCCGG | chr12:124824895-124824947 | 0 | 1 | 1 | 0 | 0 | - | - | - | - |
| 115447 | CTTCTCCTCCTC | chr12:124886984-124887041 | 0 | 1 | 1 | 0 | 0 | - | - | - | - |
| 115634 | CACCAAAAACCACAGATGAATACAGCCTGGACAGACAGAAACCGGGACAACAAACACAAAACTCA | chr12:125444943-125445071 | 0 | 1 | 1 | 0 | 0 | - | - | - | - |
| 115641 | TCCAGCTCCGACTCCGAC | chr12:125465234-125465288 | 0 | 1 | 1 | 0 | 0 | - | - | - | - |
| 115650 | CCCCAGCAA | chr12:125509852-125509879 | 0 | 1 | 1 | 0 | 0 | - | - | - | - |
| 116492 | CGGCGGGGGCGGGGCCCGGGGCGG | chr12:128751628-128752060 | 0 | 0 | 1 | 0 | 0 | - | - | - | - |
| 117874 | CGTGGAGGTGGGCGCGTGGCCAGGGTGAGGAACGGGGTCTC | chr12:132323279-132323525 | 0 | 0 | 1 | 0 | 0 | - | - | - | - |
| 117920 | CCCGGCCCCGCGCC | chr12:132379426-132379546 | 0 | 1 | 1 | 0 | 0 | - | - | - | - |
| 117926 | GGGCTGCTGAGGCCTCCCCTCCTAATACCTGCCTTGTCCCCAGGTCCTCTGCCATCCACAGGTCAGGCA | chr12:132399515-132399653 | 0 | 1 | 1 | 0 | 0 | - | - | - | - |
| 117940 | TGCAGGTGCGGCCGCCCGGGAAGCGGCGGGTCCGGCAGGGTTTAGG | chr12:132414675-132414813 | 0 | 1 | 1 | 0 | 0 | - | - | - | - |
| 117947 | GAAGAGGAG | chr12:132446442-132446478 | 0 | 1 | 1 | 0 | 0 | - | - | - | - |
| 117963 | GATAGGATCAGGAGATGCAAAGACATCCACATATACAGGTGAGGGCCTGCGGGG | chr12:132516656-132516764 | 0 | 1 | 1 | 0 | 0 | - | - | - | - |
| 117972 | CAGCCACCACCACCCCAGCAG | chr12:132537929-132538097 | 0 | 0 | 1 | 0 | 0 | - | - | - | - |
| 117982 | AGCAGAAGGCCATCCAGC | chr12:132551957-132551993 | 0 | 1 | 1 | 0 | 0 | - | - | - | - |
| 118018 | GCTGGGCTCCCCTGGCGCCTCCTCGCTGCTCCCTGC | chr12:132628350-132628602 | 0 | 0 | 1 | 0 | 0 | - | - | - | - |
| 118019 | CCTCACCCCCACCCGCCGGCCCCCGCCCACCCGCC | chr12:132633263-132633333 | 0 | 1 | 1 | 0 | 0 | - | - | - | - |
| 118020 | CCTCGGTGAGTGCCGCCGCCTCGCTCACACCACACCCCTAATCC | chr12:132633435-132635324 | 0 | 0 | 1 | 0 | 0 | - | - | - | - |
| 118021 | CTCAGCTGACCCCAGCCCACCTGTGAATAAAT | chr12:132636937-132637001 | 0 | 1 | 1 | 0 | 0 | - | - | - | - |
| 118104 | GCACTCGCCCTCACCCCGTCCCCGGACGCCGCGGCC | chr12:132824130-132824492 | 0 | 0 | 1 | 0 | 0 | - | - | - | - |
| 118113 | TAGCTCATCTGTCTGCACCTGCAGGAGACACGGTTTGGGGTGCGGTCAGGGCGCAGCATGAGGGACCCCAGGAGCCA | chr12:132839193-132839424 | 0 | 0 | 1 | 0 | 0 | - | - | - | - |
| 118382 | CCCCCGCGCCGCCGCCACCGCGAGT | chr12:133067328-133067376 | 0 | 1 | 1 | 0 | 0 | - | - | - | - |
| 118463 | GACAGACAGAAGGACGGATGGACGGCTGGACAGGCTGGAGGCCCCTGCCATGGGCACTCACCCCGCGG | chr12:133128931-133129477 | 0 | 0 | 1 | 0 | 0 | - | - | - | - |
| 118481 | CCCCGCAGCCGCCAC | chr12:133146697-133146757 | 0 | 1 | 1 | 0 | 0 | - | - | - | - |
| 118482 | CACCAGCACCAACACCAGCA | chr12:133148002-133148056 | 0 | 1 | 1 | 0 | 0 | - | - | - | - |
| 118518 | CGCGGGTGGGGACTGCAAGGGCATCAGGGGCGCCCGGCACCCACCTTATGG | chr12:133182637-133182739 | 0 | 1 | 1 | 0 | 0 | - | - | - | - |
| 118541 | CCCTCACCTCTCCGTGATGAGGGGAG | chr12:133235744-133235925 | 0 | 0 | 1 | 0 | 0 | - | - | - | - |
| 118602 | TGCTCCCGCCTGTGCCCAGCGCCTCACACACAGGTACCTGCAGCAGCTGCTGTAGCCCCTCCAGCTCCTTCCTCCCTGC | chr12:133352709-133353262 | 0 | 0 | 1 | 0 | 0 | - | - | - | - |
| 118642 | GCCCCACCCACCTCTGCCC | chr12:133384367-133384529 | 0 | 0 | 1 | 0 | 0 | - | - | - | - |
| 118660 | GGACCGCCCTCACGTGCCCGGGTGCTGGTGGAG | chr12:133433328-133434006 | 0 | 0 | 1 | 0 | 0 | - | - | - | - |
| 118664 | GTTCAGGTCAAGGTCCCCATCCACAGGAGAAAGGGATGTGTTCTAACTGTCGTAACCAAGAAGGAAATACACGCAG | chr12:133435793-133435941 | 0 | 0 | 1 | 0 | 0 | - | - | - | - |
| 118682 | CCCGGCCCCGGCC | chr12:133463743-133463794 | 0 | 1 | 1 | 0 | 0 | - | - | - | - |
| 118688 | TCTCTCCTGTATGAATTCTCTGATGCTTAATGAGCTGTACCTTCTCAACAAAAGCTTTCCCACATTCACTGCATTCATAGGGTT | chr12:133502125-133503385 | 0 | 0 | 1 | 1 | 40 | 36 | 0 | 20 | 20 |
| 118695 | AAACAGAGGATAAACCGATAACCCACCTGTGACTGGATCATTTTCATG | chr12:133521988-133522227 | 0 | 0 | 1 | 0 | 0 | - | - | - | - |
| 118722 | ACAGGAGTGAAACCCTATGAATGCAGTGAATGTGGGAAAGCCTTTAGAGTGAAGTCCCATCTCCTTGTACACCAGAGAACTCAT | chr12:133587221-133587893 | 0 | 0 | 1 | 1 | 40 | 12 | 0 | 20 | 20 |
| 118739 | AGAAGTCACAGCTCATTACACATCAGAGAACTCATACAGGAGAGAAACCCTATGAATGCAGTGAATGTGGGAAAGCCTTCTCTG | chr12:133634037-133635555 | 0 | 0 | 1 | 0 | 0 | - | - | - | - |
| 118747 | CTTTTCCACACTCACTGCATTCATAAAGTTTCTCTCCAGTGTGAATTCTCTTATGAACTATAAGGTAAGAGCTCGTGCCAAAGG | chr12:133697102-133697603 | 0 | 0 | 1 | 0 | 0 | - | - | - | - |
| 118751 | GAGAGAAACCCTATGAATGTAAAGAATGTGGAAAATCCTTCAGCTGGCTCTCTCACCTTATTAGACATCAGAAAACTCATACTG | chr12:133732613-133733695 | 0 | 0 | 1 | 0 | 0 | - | - | - | - |
| 118756 | AGAGAAACCCTATGAATGCAGTGAATGTGGGAAAGCCTTCAGTAGTAAATCACAGCTCATTGTACATCAGAGAACTCATACAGG | chr12:133779171-133781103 | 0 | 0 | 1 | 1 | 40 | 33 | 5 | 19 | 20 |
| 119440 | GCCGGGGCGGGG | chr13:21562479-21562541 | 0 | 1 | 1 | 0 | 0 | - | - | - | - |
| 120798 | GGTGGTGCGGGT | chr13:28542767-28542817 | 0 | 1 | 1 | 0 | 0 | - | - | - | - |
| 120871 | GATGATGAT | chr13:28942679-28942794 | 0 | 1 | 1 | 0 | 0 | - | - | - | - |
| 122204 | ACTGAAAAATTAAAAACAATAT | chr13:37605759-37605803 | 1 | 1 | 1 | 0 | 0 | - | - | - | - |
| 122734 | CCGCCGCCGCCA | chr13:41240057-41240081 | 1 | 1 | 1 | 0 | 0 | - | - | - | - |
| 122792 | AGAAAGAAA | chr13:41642762-41642797 | 0 | 1 | 1 | 0 | 0 | - | - | - | - |
| 122850 | CCGGCCACCTAGCCTCCCTG | chr13:41885615-41885676 | 0 | 1 | 1 | 0 | 0 | - | - | - | - |
| 123441 | GAGACTGGGCGTCGAAGGGGGGCGGAGCCCCGGGAA | chr13:45563279-45563389 | 0 | 1 | 1 | 0 | 0 | - | - | - | - |
| 123566 | TTCTTTTCCTCCAGATTCTCTTCCTTCTCCAGAGC | chr13:46170528-46170995 | 0 | 0 | 1 | 0 | 0 | - | - | - | - |
| 123575 | CTGCGGGAGGAGAACAAGGCC | chr13:46287661-46287797 | 0 | 1 | 1 | 0 | 0 | - | - | - | - |
| 123576 | AGGAGAACAGGACTCCTGCAGG | chr13:46288271-46288388 | 0 | 1 | 1 | 0 | 0 | - | - | - | - |
| 123609 | TCCCGTTCTCGCTCTCGCTCTCTC | chr13:46549567-46549881 | 0 | 0 | 1 | 0 | 0 | - | - | - | - |
| 124504 | TGGGAAGAGGAGAAAACCTTC | chr13:52439772-52440087 | 0 | 0 | 1 | 0 | 0 | - | - | - | - |
| 124695 | CTCCAG | chr13:53603093-53603152 | 0 | 1 | 1 | 0 | 0 | - | - | - | - |
| 127613 | AGGAAGAGG | chr13:70681566-70681619 | 0 | 1 | 1 | 0 | 0 | - | - | - | - |
| 127894 | GCCGCCGCCGCCGCCGCCGCCTCCGCT | chr13:72440604-72440740 | 0 | 1 | 1 | 0 | 0 | - | - | - | - |
| 127983 | CTTGCTGAAAGCAGTAACATTC | chr13:73321204-73321247 | 0 | 1 | 1 | 0 | 0 | - | - | - | - |
| 128393 | GGGGCAGAGAAGGAA | chr13:75898438-75898484 | 0 | 1 | 1 | 0 | 0 | - | - | - | - |
| 128725 | GCGGCATGGGGCGCAAGGAAGG | chr13:77900547-77900615 | 0 | 1 | 1 | 0 | 0 | - | - | - | - |
| 128783 | GCCGCCGCCGCCCCCC | chr13:78272233-78272318 | 0 | 1 | 1 | 0 | 0 | - | - | - | - |
| 128933 | CCGCCGCCCGGG | chr13:79176267-79176425 | 0 | 0 | 1 | 0 | 0 | - | - | - | - |
| 130513 | GCAGCAGCCACC | chr13:88330024-88330095 | 0 | 1 | 1 | 0 | 0 | - | - | - | - |
| 131749 | GCGGCGGCAGCG | chr13:95363806-95363890 | 0 | 1 | 1 | 0 | 0 | - | - | - | - |
| 132608 | GCGGCGGCGGCAGCG | chr13:100637702-100637880 | 0 | 0 | 1 | 0 | 0 | - | - | - | - |
| 133023 | TTGCTCCTCAGCTTCTCCATCCCTTTCCC | chr13:103389828-103389918 | 0 | 1 | 1 | 0 | 0 | - | - | - | - |
| 133024 | TTTCCCTTGCTCCTGCACCTCTCTCTGTCCTC | chr13:103390373-103390497 | 0 | 1 | 1 | 0 | 0 | - | - | - | - |
| 134531 | GATGCCCTGCGTCTGCGTGGGACCCCAGGCGTCCGTGGGGCT | chr13:111109156-111109705 | 0 | 0 | 1 | 0 | 0 | - | - | - | - |
| 134538 | TGAAATAACGATGAGTGACACCCCCACAGG | chr13:111145370-111145558 | 0 | 0 | 1 | 0 | 0 | - | - | - | - |
| 134542 | CTCTCTCTCTTTCTCGGGCTGCAGGTGCACCAGGCCGTCCA | chr13:111158481-111158778 | 0 | 0 | 1 | 0 | 0 | - | - | - | - |
| 134770 | GCCAGCGCCATCTCTCCATGCACCCCCGGGGTCAGGA | chr13:111991713-111991944 | 0 | 0 | 1 | 0 | 0 | - | - | - | - |
| 135043 | GGGCGGCGGCGG | chr13:112722055-112722103 | 0 | 1 | 1 | 0 | 0 | - | - | - | - |
| 135044 | CGCACC | chr13:112722636-112722714 | 0 | 1 | 1 | 0 | 0 | - | - | - | - |
| 135212 | AGACGCGCGTGGGAA | chr13:113201813-113201933 | 0 | 1 | 1 | 0 | 0 | - | - | - | - |
| 135541 | AGGAACTGCGAGGAGGCGCTG | chr13:113740455-113740494 | 0 | 1 | 1 | 0 | 0 | - | - | - | - |
| 135550 | CCGTCCGGCTCGGC | chr13:113750919-113750963 | 0 | 1 | 1 | 0 | 0 | - | - | - | - |
| 135581 | CGCGGTGCTGGGTGGGTGCCACTCTCCCCTGTCCGAC | chr13:113771899-113772121 | 0 | 0 | 1 | 0 | 0 | - | - | - | - |
| 135607 | TCCTCCTCCTGCTCAGGTCCCCGTCCCTGCCACCTCCCCACA | chr13:113816078-113817358 | 0 | 0 | 1 | 0 | 0 | - | - | - | - |
| 135655 | CCTCACCTAGGAGAGGAAGGACAACACGGTAGGGCTGGAG | chr13:113973943-113974022 | 0 | 1 | 1 | 0 | 0 | - | - | - | - |
| 135676 | ACCCACCTGCGCCCCCGGG | chr13:114018032-114018139 | 0 | 1 | 1 | 0 | 0 | - | - | - | - |
| 135912 | GCCGCTTCACACCTCACCCACCC | chr13:114307511-114307641 | 0 | 1 | 1 | 0 | 0 | - | - | - | - |
| 136042 | CCTGCGGGAGGTGAGGGGCGCTGGGGACCCCCATATCTACA | chr13:114503875-114504039 | 0 | 0 | 1 | 0 | 0 | - | - | - | - |
| 136203 | TTCTCCCCTCCTGCCCTGCCGGACGCCACCTTACCCTTCTCCCCTCCTGCCCTGCCGGACGCCACCTTACCC | chr13:114771212-114773039 | 0 | 0 | 1 | 0 | 0 | - | - | - | - |
| 136440 | CTTCTCCTGAACCTCCAAAACCAGTCCTCTGTTT | chr13:115089831-115089957 | 0 | 1 | 1 | 0 | 0 | - | - | - | - |
| 136441 | CTCCATCTGTGTCTCCTGGACCTTGGAAACCAA | chr13:115090335-115090434 | 0 | 1 | 1 | 0 | 0 | - | - | - | - |
| 136723 | TTGCTCTTGCCGCTCCCCCTGCACCAGGGGAAGCAGTGGCGGCACCACTTGCCCATC | chr14:20019984-20020152 | 0 | 0 | 1 | 0 | 0 | - | - | - | - |
| 136910 | TGGCATCACTATCCATGC | chr14:20837535-20837588 | 0 | 1 | 1 | 0 | 0 | - | - | - | - |
| 136915 | GTGGCCAGGCACCGGTTCTCCAAGGAGAGGATGTCTGGGTGGGCAGACACATGCTCCATGTGGTTTCTCCATGGTCTTCAGGTCAGGAAGC | chr14:20876257-20876616 | 0 | 0 | 1 | 0 | 0 | - | - | - | - |
| 137123 | CATCCTCCTCTTCCTCCT | chr14:21991532-21991568 | 0 | 1 | 1 | 0 | 0 | - | - | - | - |
| 137350 | GCACAC | chr14:23352464-23352516 | 0 | 1 | 1 | 0 | 0 | - | - | - | - |
| 137375 | GGCGCGCGGGAGGGCCG | chr14:23517490-23517523 | 0 | 1 | 1 | 0 | 0 | - | - | - | - |
| 137380 | TCCCTTTCCCTAGCCTCGATCTCGG | chr14:23528432-23528596 | 0 | 0 | 1 | 0 | 0 | - | - | - | - |
| 137387 | TCCTCTTCTTCC | chr14:23549857-23549918 | 0 | 1 | 1 | 0 | 0 | - | - | - | - |
| 137606 | GGGGGTGCT | chr14:24838901-24838929 | 0 | 1 | 1 | 0 | 0 | - | - | - | - |
| 137609 | TTCCAAAGCACCTGCAGC | chr14:24878958-24879048 | 0 | 1 | 1 | 0 | 0 | - | - | - | - |
| 138249 | CCGCCGCCGCCGCGCCCCGCACCG | chr14:29236656-29236838 | 0 | 0 | 1 | 0 | 0 | - | - | - | - |
| 138250 | CGGGCGAGGGCGGCAAGGA | chr14:29236960-29237021 | 0 | 1 | 1 | 0 | 0 | - | - | - | - |
| 139046 | CGGCGGGCGGGGG | chr14:34269798-34269836 | 0 | 1 | 1 | 0 | 0 | - | - | - | - |
| 139257 | TCTTTCAGTTTTTCTTCTTGC | chr14:35252363-35252427 | 0 | 1 | 1 | 0 | 0 | - | - | - | - |
| 139266 | TTTTCTTCTTTCTACTTTAAGCCTCTCT | chr14:35269430-35269590 | 0 | 0 | 1 | 0 | 0 | - | - | - | - |
| 139596 | CTGCGCCTGCTG | chr14:36986713-36986752 | 0 | 1 | 1 | 0 | 0 | - | - | - | - |
| 139825 | GCTCTGAGCCCGGGCCACGCAGGG | chr14:38679763-38679811 | 1 | 1 | 1 | 0 | 0 | - | - | - | - |
| 139962 | AGTAGCAGCAGTGGA | chr14:39650677-39650830 | 0 | 0 | 1 | 0 | 0 | - | - | - | - |
| 140883 | CTCCTCAGCTGGTGGAGGCTGAACTTCAGCGGGGGC | chr14:44974123-44975054 | 0 | 0 | 1 | 0 | 0 | - | - | - | - |
| 142944 | CATCTTCATCTTCCT | chr14:58563612-58563699 | 0 | 1 | 1 | 0 | 0 | - | - | - | - |
| 143115 | GCCTCCTCCTCCCTCCAGGTG | chr14:59798063-59798140 | 0 | 1 | 1 | 0 | 0 | - | - | - | - |
| 143873 | CCTGCAGCTGCTCCT | chr14:64692099-64692149 | 0 | 1 | 1 | 0 | 0 | - | - | - | - |
| 144404 | GTCACAGAA | chr14:67671680-67671761 | 0 | 1 | 1 | 0 | 0 | - | - | - | - |
| 144635 | CGGTGGCAGCGG | chr14:69256614-69256638 | 1 | 1 | 1 | 0 | 0 | - | - | - | - |
| 145357 | GAGAAAGGGAAC | chr14:73569966-73570154 | 0 | 0 | 1 | 0 | 0 | - | - | - | - |
| 145360 | GAGAGAGAGAGAGAGAAC | chr14:73572607-73572776 | 0 | 0 | 1 | 0 | 0 | - | - | - | - |
| 145416 | CTCCTCTGACAGGTGTGTGTGACAGCCCCCCTAC | chr14:73730478-73730776 | 0 | 0 | 1 | 0 | 0 | - | - | - | - |
| 145464 | GGGTGCGGCGCGAGCC | chr14:74004522-74004569 | 0 | 1 | 1 | 0 | 0 | - | - | - | - |
| 145504 | CAGGATGGCGGCTGCCCCAGGGAGC | chr14:74205525-74205572 | 0 | 1 | 1 | 0 | 0 | - | - | - | - |
| 145651 | GGCGACTGTGGTGCGGGC | chr14:75052565-75052615 | 0 | 1 | 1 | 0 | 0 | - | - | - | - |
| 145693 | TCTCTCTCTTCTGCAGGGCCACCACCAGTTCTCCCCCCACCA | chr14:75248486-75248654 | 0 | 0 | 1 | 0 | 0 | - | - | - | - |
| 145695 | GCTGGCAGTCGAGAGAGGGGACCACCTCGAAGG | chr14:75265315-75265477 | 0 | 0 | 1 | 0 | 0 | - | - | - | - |
| 145697 | CCACCTCCACCTCCT | chr14:75276202-75276246 | 0 | 1 | 1 | 0 | 0 | - | - | - | - |
| 145820 | ACCCCAGCGTCTCGGTCC | chr14:76045385-76045529 | 0 | 0 | 1 | 0 | 0 | - | - | - | - |
| 147990 | TACCATCCCCCATCTCACCCTGCAAG | chr14:89073681-89074710 | 0 | 0 | 1 | 0 | 0 | - | - | - | - |
| 148467 | CCTGTTCACATGGGCGACCCAGGTCAGTGTCTCTCGCTCCTGCCCATGATCCC | chr14:91639761-91639920 | 0 | 0 | 1 | 0 | 0 | - | - | - | - |
| 148470 | TCGGCATAGACCCAGGTAAGAAACAACACATTTGC | chr14:91647718-91647788 | 1 | 1 | 1 | 0 | 0 | - | - | - | - |
| 148506 | CCAGGCTCCACCCTCTCC | chr14:91769658-91770068 | 0 | 0 | 1 | 0 | 0 | - | - | - | - |
| 148647 | GAGTAGGGGGTC | chr14:92403403-92403440 | 0 | 1 | 1 | 0 | 0 | - | - | - | - |
| 148842 | AGAGGAGGCTGAGGCAGG | chr14:93397922-93397978 | 0 | 1 | 1 | 0 | 0 | - | - | - | - |
| 148897 | TTTTCTCTAGTGTCTGTT | chr14:93709204-93709260 | 0 | 1 | 1 | 0 | 0 | - | - | - | - |
| 149361 | GGAGCAGGAACAGCA | chr14:95884257-95884321 | 0 | 1 | 1 | 0 | 0 | - | - | - | - |
| 149601 | CTTCAGGAAATGCAGCAA | chr14:97022628-97022664 | 1 | 1 | 1 | 0 | 0 | - | - | - | - |
| 150095 | CGCCCGCGTCCCCGCCGC | chr14:99641233-99641287 | 0 | 1 | 1 | 0 | 0 | - | - | - | - |
| 150156 | CAGCAACCAGCCCAACAG | chr14:99969231-99969267 | 0 | 1 | 1 | 0 | 0 | - | - | - | - |
| 150329 | ACGGCGGCGGGGGCGACC | chr14:100705738-100705792 | 0 | 1 | 1 | 0 | 0 | - | - | - | - |
| 150330 | GCGGCAAGAAGA | chr14:100706107-100706131 | 1 | 1 | 1 | 0 | 0 | - | - | - | - |
| 150480 | CTCCTCCAGGTCTTGGAGTAGATCAGTGGGCAGATCCTCCATTTCCTGGACGTGGGCCACTGGAGGG | chr14:101350822-101350954 | 0 | 1 | 1 | 0 | 0 | - | - | - | - |
| 150889 | GCCGCCTCCGCCTCC | chr14:103059286-103059418 | 0 | 1 | 1 | 0 | 0 | - | - | - | - |
| 151329 | GGCCCCTGGAGGGGG | chr14:104642391-104642420 | 0 | 1 | 1 | 0 | 0 | - | - | - | - |
| 151544 | GACGGGCAG | chr14:105055118-105055145 | 1 | 1 | 1 | 0 | 0 | - | - | - | - |
| 151578 | CCCCAC | chr14:105173862-105173892 | 0 | 1 | 1 | 0 | 0 | - | - | - | - |
| 151586 | TGGCGTCGGCGTCGTGGGGAGGAGCG | chr14:105195809-105196246 | 0 | 0 | 1 | 0 | 0 | - | - | - | - |
| 151679 | TTGGGCATCTTGAAAC | chr14:105412074-105412158 | 0 | 1 | 1 | 0 | 0 | - | - | - | - |
| 151681 | TTGGGCATCTTGAAAC | chr14:105412569-105412613 | 0 | 1 | 1 | 0 | 0 | - | - | - | - |
| 151688 | CTTGGGGCCCTTGACGTCCAG | chr14:105416465-105416528 | 0 | 1 | 1 | 0 | 0 | - | - | - | - |
| 151695 | CTTGGGGCCCTTCAGGTCCA | chr14:105419435-105419501 | 0 | 1 | 1 | 0 | 0 | - | - | - | - |
| 151696 | GGCATCTTGAACTTG | chr14:105419739-105419769 | 0 | 1 | 1 | 0 | 0 | - | - | - | - |
| 151787 | CCCGCAGCCCCAGCAGCC | chr14:105617512-105617625 | 0 | 1 | 1 | 0 | 0 | - | - | - | - |
| 151832 | TCCTCCTCGTCAGCC | chr14:105677502-105677546 | 0 | 1 | 1 | 0 | 0 | - | - | - | - |
| 151853 | CCGCCCGCGCCCCCG | chr14:105715306-105715472 | 0 | 0 | 1 | 0 | 0 | - | - | - | - |
| 151856 | ACCCCAGGTCACA | chr14:105722777-105722829 | 0 | 1 | 1 | 0 | 0 | - | - | - | - |
| 151876 | GGGCGGCCGGGCGCGCGCG | chr14:105781006-105781272 | 0 | 0 | 1 | 0 | 0 | - | - | - | - |
| 151948 | CCCCCACCCCACGTA | chr14:105945024-105945073 | 0 | 1 | 1 | 0 | 0 | - | - | - | - |
| 151950 | CGGCCAGCGCGGTGATTGGGTACAGGTCT | chr14:105957444-105957617 | 0 | 0 | 1 | 0 | 0 | - | - | - | - |
| 151970 | GCTGGACCT | chr14:105995632-105995667 | 0 | 1 | 1 | 0 | 0 | - | - | - | - |
| 153205 | CAGGAGGAGAAGATACGAGAG | chr15:22742506-22743654 | 0 | 0 | 1 | 0 | 0 | - | - | - | - |
| 153264 | CCGCCCGCCTGCCCCCACCCGC | chr15:23086182-23086250 | 0 | 1 | 1 | 0 | 0 | - | - | - | - |
| 153401 | TCTCCTCCTGCTCCCGCATCT | chr15:23685006-23686804 | 0 | 0 | 1 | 0 | 0 | - | - | - | - |
| 153431 | CAGGGCCCTGGAGGTGCTAGGGCCCTCCCAGCCACT | chr15:23889952-23890132 | 0 | 0 | 1 | 0 | 0 | - | - | - | - |
| 153432 | GGCCCTGCGCTCTTTAGAGGA | chr15:23890657-23890742 | 0 | 1 | 1 | 0 | 0 | - | - | - | - |
| 153433 | GCGGGGCAGACA | chr15:23891157-23891193 | 0 | 1 | 1 | 0 | 0 | - | - | - | - |
| 153434 | GCCTGGCGGATCACAGGTGGG | chr15:23891402-23891761 | 0 | 0 | 1 | 0 | 0 | - | - | - | - |
| 153439 | GCCATCGGCTGTGCAGGTGGG | chr15:23891909-23892018 | 0 | 1 | 1 | 0 | 0 | - | - | - | - |
| 153441 | GGCTGGACCATCAGGACTCCCGGAGCAGA | chr15:23892104-23892584 | 0 | 0 | 1 | 1 | 34 | 17 | 0 | 17 | 17 |
| 153758 | TGGACTCCTCAGGACACCCTCC | chr15:25924747-25924791 | 0 | 1 | 1 | 0 | 0 | - | - | - | - |
| 154390 | TCTCCTCCAGCTGCCTGCAGCCTCACCTACTGCTCCCGCATCT | chr15:28595371-28597161 | 0 | 0 | 1 | 0 | 0 | - | - | - | - |
| 154495 | CAGGAGGAGAAGATGCGGAG | chr15:28804875-28806601 | 0 | 0 | 1 | 0 | 0 | - | - | - | - |
| 155069 | GAGCCGGAGCCCGAGGCGG | chr15:31619784-31619856 | 0 | 1 | 1 | 0 | 0 | - | - | - | - |
| 155487 | TCCGCCGCCGCC | chr15:34331100-34331196 | 0 | 1 | 1 | 0 | 0 | - | - | - | - |
| 155535 | GGAGGCAGAAGCTGTGGTTTCTGTGCTACTTCCCATTCTCCTGTCCATCTCTTACCTTAGTGTACATTCCGAA | chr15:34646513-34646659 | 0 | 0 | 1 | 0 | 0 | - | - | - | - |
| 156139 | GGGGTGGTAGAGGAGGTGGTGGGGGAG | chr15:38776561-38776837 | 0 | 0 | 1 | 0 | 0 | - | - | - | - |
| 156358 | GCAGGCCCTTGGAACACAG | chr15:40477541-40477600 | 0 | 1 | 1 | 0 | 0 | - | - | - | - |
| 156369 | TGGCCATGCTCCAGGGCCCTGCGGGCCACCCCC | chr15:40648296-40648488 | 0 | 0 | 1 | 0 | 0 | - | - | - | - |
| 156389 | GCTGCTGGCTCGTCCCCG | chr15:40846182-40846238 | 0 | 1 | 1 | 0 | 0 | - | - | - | - |
| 156622 | AAAAGAAAG | chr15:41757000-41757068 | 0 | 1 | 1 | 0 | 0 | - | - | - | - |
| 156697 | CGGGGCGAGGGTCTGGGGGTGTGGCCTGCGGCGGGGACTCTGGGAAGGG | chr15:42120148-42120347 | 0 | 0 | 1 | 0 | 0 | - | - | - | - |
| 156725 | TGGAAGCAGGCAGAGGTT | chr15:42292365-42292414 | 0 | 1 | 1 | 0 | 0 | - | - | - | - |
| 156839 | CCAGTGAGTGGGATGCCAGAGCTGGATCTGTGTTGGGACTGGTACTCTATCTCAGAGAAAGGGCCATGGCC | chr15:42955685-42955898 | 0 | 0 | 1 | 0 | 0 | - | - | - | - |
| 156841 | TCCAACCCCATTGTGAGC | chr15:42977617-42977689 | 0 | 1 | 1 | 0 | 0 | - | - | - | - |
| 156965 | TTACTGAAGCTCTTTCCACAGTCAGGACACACATAGGGTCTCTCTCCTGTGTGGATCCTACGATGTGCACGTAAAATCAGAACTC | chr15:43653343-43653849 | 0 | 0 | 1 | 0 | 0 | - | - | - | - |
| 156987 | AAGGAGAAAAAAGAGATCAAA | chr15:43814922-43815030 | 0 | 1 | 1 | 0 | 0 | - | - | - | - |
| 156988 | AGACTTAGAACAAAAAGACACAGGCCCTAGAACAGAAGGACAAGAGCCCTAGAACCAGAAAGACAA | chr15:43817909-43818423 | 0 | 0 | 1 | 0 | 0 | - | - | - | - |
| 156993 | CTGGCATGGCTGGCTGATGTCAGGGACCTC | chr15:43827240-43827427 | 0 | 0 | 1 | 0 | 0 | - | - | - | - |
| 157166 | TCTGGGTCCAGA | chr15:44967747-44967771 | 1 | 1 | 1 | 0 | 0 | - | - | - | - |
| 157167 | TCCTCCTCGTCC | chr15:44967771-44967819 | 0 | 1 | 1 | 0 | 0 | - | - | - | - |
| 158171 | CGGGCGGCGGCGGCATCG | chr15:51200924-51200978 | 0 | 1 | 1 | 0 | 0 | - | - | - | - |
| 158227 | AGGCCCACCAGGTCCACCAGGGCCCCC | chr15:51689682-51689736 | 0 | 1 | 1 | 0 | 0 | - | - | - | - |
| 158325 | GGTGCGCTCCCGCAACGGGTCAACCATGGT | chr15:52404866-52404926 | 0 | 1 | 1 | 0 | 0 | - | - | - | - |
| 158427 | TGGTGGTGGTGATGG | chr15:53081665-53081783 | 0 | 1 | 1 | 0 | 0 | - | - | - | - |
| 158859 | AATAAAATACATACT | chr15:56130275-56130305 | 0 | 1 | 1 | 0 | 0 | - | - | - | - |
| 158902 | GTGGGT | chr15:56387061-56387099 | 0 | 1 | 1 | 0 | 0 | - | - | - | - |
| 159011 | TTGTATTAGGTTTAC | chr15:56958966-56959058 | 0 | 1 | 1 | 0 | 0 | - | - | - | - |
| 159498 | GTGGCGGCGGCGGAGGC | chr15:59981576-59981628 | 0 | 1 | 1 | 0 | 0 | - | - | - | - |
| 160413 | TCCGTCGGCATAAACTT | chr15:65903458-65903492 | 1 | 1 | 1 | 0 | 0 | - | - | - | - |
| 160418 | GGTGAAGGTGAAACTGAAACACAA | chr15:65942779-65943025 | 0 | 0 | 1 | 0 | 0 | - | - | - | - |
| 160422 | AAGAGGAAGAGGAGGAGGAGGAAGAGC | chr15:65943065-65943173 | 0 | 1 | 1 | 0 | 0 | - | - | - | - |
| 160830 | TTCACAGTACAGGTCCAGTTAAGGTACAGTGCTGACTATAGGATATATTCAAAGTTTAAAAGATAATATTCCTT | chr15:68434652-68434800 | 0 | 0 | 1 | 0 | 0 | - | - | - | - |
| 161062 | TGGAGGGTGAGTGGCCCTCGTGTTCATGG | chr15:69675593-69677016 | 0 | 0 | 1 | 0 | 0 | - | - | - | - |
| 161187 | CCCAGCCCACCCTCTGC | chr15:70358302-70358353 | 0 | 1 | 1 | 0 | 0 | - | - | - | - |
| 161910 | CAGCAGTCCCTCCTACCCG | chr15:74219628-74219685 | 0 | 1 | 1 | 0 | 0 | - | - | - | - |
| 161931 | TCCTCGCCAGCCCAC | chr15:74327545-74327621 | 0 | 1 | 1 | 0 | 0 | - | - | - | - |
| 161944 | AGCCTCTCCTCCTGCTTTCGC | chr15:74366900-74367195 | 0 | 0 | 1 | 0 | 0 | - | - | - | - |
| 162124 | CCACCCA | chr15:75499185-75499229 | 0 | 1 | 1 | 0 | 0 | - | - | - | - |
| 162127 | GCCACAGCTGAGCCTGACTCA | chr15:75499955-75500020 | 0 | 1 | 1 | 0 | 0 | - | - | - | - |
| 162128 | GCTCCA | chr15:75500552-75500660 | 0 | 1 | 1 | 0 | 0 | - | - | - | - |
| 162748 | TGGGGGTGGGGAGTTGGCGGGGGA | chr15:79060365-79060485 | 0 | 1 | 1 | 0 | 0 | - | - | - | - |
| 163521 | GGGGCGGGGCAG | chr15:83349173-83349249 | 0 | 1 | 1 | 0 | 0 | - | - | - | - |
| 163789 | GAGAGGCTGCGGGAGCTG | chr15:84909387-84909534 | 0 | 0 | 1 | 0 | 0 | - | - | - | - |
| 163848 | ACACCAGAGAACCCACACGGGAGAGAAACCCTACAAATGCAGCGAGTGTGGGAAGAGCTTCAGCCAGAGCTCCAACCTCCTCA | chr15:85164562-85165329 | 0 | 0 | 1 | 0 | 0 | - | - | - | - |
| 163850 | CTTGGCTCCGTGTTCCAT | chr15:85186876-85186912 | 1 | 1 | 1 | 0 | 0 | - | - | - | - |
| 163881 | GGATGCAGGGAGAGAAGG | chr15:85400058-85400111 | 0 | 1 | 1 | 0 | 0 | - | - | - | - |
| 163927 | ACAGGAGGAGAGGCTACGTGA | chr15:85787808-85788449 | 0 | 0 | 1 | 0 | 0 | - | - | - | - |
| 163935 | GGAGAGGCTGCAGGAGCT | chr15:85788491-85788635 | 0 | 0 | 1 | 0 | 0 | - | - | - | - |
| 164505 | CCTCAGAGGAGCCATTCC | chr15:89398163-89398344 | 0 | 0 | 1 | 0 | 0 | - | - | - | - |
| 164506 | CTCTGCCCCTGGAGTAGAGGACATCAGCGGGCTTCCTTCTGGAGAAGTTCTAGAGAC | chr15:89398653-89400662 | 0 | 0 | 1 | 0 | 0 | - | - | - | - |
| 164579 | GAGGAGGAAGAG | chr15:89835990-89836014 | 1 | 1 | 1 | 0 | 0 | - | - | - | - |
| 164623 | GGGTACTGA | chr15:90016013-90016048 | 0 | 1 | 1 | 0 | 0 | - | - | - | - |
| 164627 | ATCATGGTGGCCTTCACCC | chr15:90023379-90023493 | 0 | 1 | 1 | 0 | 0 | - | - | - | - |
| 164660 | GACCTCACCTGGCAG | chr15:90175875-90176057 | 0 | 0 | 1 | 0 | 0 | - | - | - | - |
| 164725 | AGGGGC | chr15:90320120-90320216 | 0 | 1 | 1 | 0 | 0 | - | - | - | - |
| 164854 | GCTGCTGCTGCTCCT | chr15:90744881-90744927 | 0 | 1 | 1 | 0 | 0 | - | - | - | - |
| 166536 | CCGCGAC | chr15:100273567-100273628 | 0 | 1 | 1 | 0 | 0 | - | - | - | - |
| 166573 | GCACTGCGGAGACAGGACAGCCTGAGTGGGGCCTACACGAGGTCAGGGGGCTGGGATGATGGCCTCACAATGTG | chr15:100516424-100516647 | 0 | 0 | 1 | 0 | 0 | - | - | - | - |
| 166670 | CCTCTT | chr15:100943003-100943063 | 0 | 1 | 1 | 0 | 0 | - | - | - | - |
| 166884 | GCGCCCCCC | chr15:102029766-102029802 | 0 | 1 | 1 | 0 | 0 | - | - | - | - |
| 166885 | GGCGGCGGCGGCCCGGGCGCA | chr15:102029813-102029898 | 0 | 1 | 1 | 0 | 0 | - | - | - | - |
| 166926 | CGCCACGGCCTCCGC | chr15:102264554-102264618 | 0 | 1 | 1 | 0 | 0 | - | - | - | - |
| 167051 | GCAGAGCAGCCACACAGCTCGTCCGACGCAGCCCAGGCACCT | chr16:129465-129549 | 0 | 1 | 1 | 0 | 0 | - | - | - | - |
| 167068 | GCCCAGGGAGAGCCACACCTGCCCAGAGGGTCTGTACATGCCCAGGGAGAACCACACCTGCCCAAGGACAGCCACATCTGCCCAGGGGAAGCCACACCT | chr16:168788-169189 | 0 | 0 | 1 | 0 | 0 | - | - | - | - |
| 167103 | CCCCAGGCTCAGGTCCCTCTCTTCCTGGGCCTTGTGTCATTGCAG | chr16:311953-312091 | 0 | 1 | 1 | 0 | 0 | - | - | - | - |
| 167127 | ACAGGGTGTCTGGGGCAGGACTTACACACTGCTGTCCGTGAGGG | chr16:364429-364609 | 0 | 0 | 1 | 0 | 0 | - | - | - | - |
| 167180 | GGGGGCTCCGGGGCGGCG | chr16:447095-447232 | 0 | 1 | 1 | 0 | 0 | - | - | - | - |
| 167197 | CTCGTGCGCTCTGTGAGAAGTTCTTCCGGGTGGGTGC | chr16:460338-460486 | 0 | 0 | 1 | 0 | 0 | - | - | - | - |
| 167232 | AGAACCTGCAGGCCAGGTAGGAGAGGTTCCCGACAGCCCGCCAACCCC | chr16:560784-562041 | 0 | 0 | 1 | 0 | 0 | - | - | - | - |
| 167267 | GTCCTGTGTGTGTGAGGCCTGCTGTGCTCAGCCGAGGGCTGGGGCCTGAGCACCTCCCGAGGGCCTGACCCCACCCTGCCAGGCTACATCGCACCTCAT | chr16:628609-628800 | 0 | 0 | 1 | 0 | 0 | - | - | - | - |
| 167319 | GGAGCTGACTGCCGACTATCTCTCCCCTCCATGAGTGACGCCGGGGCTTGAGGCCTGCCCTCCCCGAGGGTCA | chr16:721173-721319 | 0 | 0 | 1 | 0 | 0 | - | - | - | - |
| 167375 | GCCCAGGCCCACCCCAACCCACGATGCCCGCCCGGTGGGTCCCTGCCT | chr16:836973-837115 | 0 | 0 | 1 | 0 | 0 | - | - | - | - |
| 167383 | GGAGTGGGGCTCACAGGATGGTGGGAGTGGGGCCGGGAGTGGGCTCACAGGATGGTGTGAGTGGGGCCG | chr16:848086-848773 | 0 | 0 | 1 | 0 | 0 | - | - | - | - |
| 167586 | CCCCCTCCACAGGTC | chr16:1144757-1144787 | 1 | 1 | 1 | 0 | 0 | - | - | - | - |
| 167648 | CTCAGCACACCCCTGCCCCCACC | chr16:1256949-1257017 | 0 | 1 | 1 | 0 | 0 | - | - | - | - |
| 167741 | CCCCAGCCT | chr16:1395416-1395793 | 0 | 0 | 1 | 0 | 0 | - | - | - | - |
| 167752 | CCCTCCCTCCCTCCCCCTCCCATCTCACCCCCCACACGCTCACCTGAGTCACCTGCGG | chr16:1417500-1417671 | 0 | 0 | 1 | 0 | 0 | - | - | - | - |
| 167767 | CGCTGGACGCCA | chr16:1435304-1435352 | 0 | 1 | 1 | 0 | 0 | - | - | - | - |
| 167773 | CCCCGTGCTTCACGCTGGGGCAGGGCGTGGACCTGGGGATGAGGAGGTGTCAGGGGGACACAGAGGACTTGGCTCCCCCACCCCGAC | chr16:1447264-1447875 | 0 | 0 | 1 | 0 | 0 | - | - | - | - |
| 167798 | CGGCCCTTCCTGGAGACCAGAAGGACCGGTGCTCAGAGACACGCGTGACG | chr16:1507329-1507630 | 0 | 0 | 1 | 0 | 0 | - | - | - | - |
| 167898 | CGGGGCGGAGGTACGCGGGGCGCGG | chr16:1779569-1779644 | 0 | 1 | 1 | 0 | 0 | - | - | - | - |
| 167942 | GGGGCCTGAGTCC | chr16:1840564-1840603 | 0 | 1 | 1 | 0 | 0 | - | - | - | - |
| 167974 | CCCGGCCCCTGCCGCCCAGGCCGCC | chr16:1968264-1968312 | 0 | 1 | 1 | 0 | 0 | - | - | - | - |
| 167993 | CCCCGGGCCCGCCTGACCCATCTGAACT | chr16:2048657-2048713 | 0 | 1 | 1 | 0 | 0 | - | - | - | - |
| 167998 | GCGCCCCAGAGCCCGC | chr16:2070241-2070273 | 0 | 1 | 1 | 0 | 0 | - | - | - | - |
| 168018 | CCCTGCAGTGCAGGAAAGGTAGGGCCGGGTGGGG | chr16:2137924-2138028 | 0 | 1 | 1 | 0 | 0 | - | - | - | - |
| 168019 | GGGACGCTGCCGGGGCGGGGCCCTGCGAGGGGGC | chr16:2141204-2141763 | 0 | 0 | 1 | 0 | 0 | - | - | - | - |
| 168033 | CCCACCA | chr16:2165958-2165994 | 0 | 1 | 1 | 0 | 0 | - | - | - | - |
| 168051 | CGCCCATCTCTGCCGAGCCC | chr16:2228787-2228932 | 0 | 0 | 1 | 0 | 0 | - | - | - | - |
| 168054 | CGCTGCCCCGCCCC | chr16:2239377-2239420 | 0 | 1 | 1 | 0 | 0 | - | - | - | - |
| 168061 | CGCCGCCCGCCGGCCGC | chr16:2264778-2264886 | 0 | 1 | 1 | 0 | 0 | - | - | - | - |
| 168123 | CCCCTCCAT | chr16:2499760-2499831 | 0 | 1 | 1 | 0 | 0 | - | - | - | - |
| 168162 | TCTCGGTCTAGAACACCAGCCCGGAGGGGCAGGTCACGCTCTAGAACACCTGCTAGGCGCAGATCTACGATCCAGAACTCACCACCACGACGCAGG | chr16:2812245-2812734 | 0 | 0 | 1 | 0 | 0 | - | - | - | - |
| 168165 | CTCCTCCTCTTCTTCTTCCTCCTC | chr16:2819102-2819221 | 0 | 1 | 1 | 0 | 0 | - | - | - | - |
| 168285 | CACACGGGCGAGAAGCCCTACGCCTGCACCGACTGCCGGAAGAGCTTCAGCCACCAGCTCGCACGCTCATCCAGCACCAGAGCATC | chr16:3169648-3170236 | 0 | 0 | 1 | 1 | 40 | 11 | 0 | 20 | 20 |
| 168431 | GTGGAGACTGGGACAGGGGCC | chr16:3777969-3778062 | 0 | 1 | 1 | 0 | 0 | - | - | - | - |
| 168432 | TGCTGCTGCTGT | chr16:3778403-3778463 | 0 | 1 | 1 | 0 | 0 | - | - | - | - |
| 168433 | TGCATGCCAGGCTGGGGC | chr16:3778646-3778720 | 0 | 1 | 1 | 0 | 0 | - | - | - | - |
| 168559 | ATCTCAAGCCCTACCTGTG | chr16:4253133-4253188 | 0 | 1 | 1 | 0 | 0 | - | - | - | - |
| 168620 | GGGTAGGGCCCTGGC | chr16:4562989-4563052 | 0 | 1 | 1 | 0 | 0 | - | - | - | - |
| 168633 | GGGCCCGCAAGGATG | chr16:4625895-4626135 | 0 | 0 | 1 | 0 | 0 | - | - | - | - |
| 168708 | AGCCCCAGGAAGGTG | chr16:4846022-4846052 | 0 | 1 | 1 | 0 | 0 | - | - | - | - |
| 168760 | CTGCTGCCGCTGCTGTCTG | chr16:5121871-5121907 | 0 | 1 | 1 | 0 | 0 | - | - | - | - |
| 169699 | GTCCCAGAGGGGTGGGGGCTGACCTGCACTTGCGTATAGAGATGGATGCCCGGCTGCATGGTGACCTCGGA | chr16:8998127-8998340 | 0 | 0 | 1 | 0 | 0 | - | - | - | - |
| 170316 | CTCTTCTTCCTCCTC | chr16:11367251-11367296 | 0 | 1 | 1 | 0 | 0 | - | - | - | - |
| 170318 | TGGCCTGGGCTC | chr16:11367393-11367439 | 0 | 1 | 1 | 0 | 0 | - | - | - | - |
| 170319 | GGGCTTGAGCATTTGATGTAGGGGAATTGCTATGGCCTCACTCGGTGTTTCTTGGGCAGGTGACTTTCTCTTAACTTCCAGCTGG | chr16:11369572-11369736 | 0 | 0 | 1 | 0 | 0 | - | - | - | - |
| 170915 | GAGGAAGGAGATCGTC | chr16:14029304-14029353 | 0 | 1 | 1 | 0 | 0 | - | - | - | - |
| 171350 | GCTCCTCCTCCA | chr16:15812221-15812245 | 1 | 1 | 1 | 0 | 0 | - | - | - | - |
| 171438 | CCGCCGCCGCCCGCGCGCCAGCAACCGGGCCCGATCACCCGCCGCCCGGTGC | chr16:16043479-16043801 | 0 | 0 | 1 | 0 | 0 | - | - | - | - |
| 172417 | CTTCTTTTTCTT | chr16:19726141-19726165 | 1 | 1 | 1 | 0 | 0 | - | - | - | - |
| 172798 | GACGCTCGGAAGGTGTCTTGAGATTATCATCTGCTGAGGGTGGAGCTGAGGGTGGAAGGGGAGTGAGCT | chr16:21415887-21416466 | 0 | 0 | 1 | 0 | 0 | - | - | - | - |
| 173011 | CTCAAGACACCTCCCGAGTGTCTGCTCACTCCCCTTCCACCCTCAGCGGATGATAAT | chr16:22545090-22546054 | 0 | 0 | 1 | 0 | 0 | - | - | - | - |
| 173018 | TCCACCCTCAGCAGATGATAATATCAAGACACCTGCCGAGCGTCAGCGCACGCCGCTT | chr16:22546729-22547359 | 0 | 0 | 1 | 0 | 0 | - | - | - | - |
| 173023 | CACGCAAACCCAAGAGGCGGAGGGCCGCTGACGTGGAACCATCATCACCCGAACCCAAGAGGCGGAGGGTCGGTGACGTGGAACCGT | chr16:22547371-22547718 | 0 | 0 | 1 | 0 | 0 | - | - | - | - |
| 173160 | CCCGTCCTCAAAGT | chr16:23197552-23197594 | 0 | 1 | 1 | 0 | 0 | - | - | - | - |
| 173501 | AAACATAAG | chr16:24583595-24583641 | 0 | 1 | 1 | 0 | 0 | - | - | - | - |
| 173577 | CAGCAGCCACAG | chr16:24788366-24788471 | 0 | 1 | 1 | 0 | 0 | - | - | - | - |
| 173770 | CCGCCGCCGAGC | chr16:25703949-25703983 | 0 | 1 | 1 | 0 | 0 | - | - | - | - |
| 174415 | GTGCCC | chr16:28332083-28332148 | 0 | 1 | 1 | 0 | 0 | - | - | - | - |
| 174427 | CCTCCGCCTCTTGGGTTTGGGTGATTGTTCCACCTCATCCAC | chr16:28353987-28354155 | 0 | 0 | 1 | 0 | 0 | - | - | - | - |
| 174479 | GGGGAGGAGGCCGGGACAGCCTCAGGC | chr16:28507253-28507493 | 0 | 0 | 1 | 0 | 0 | - | - | - | - |
| 174599 | GAGCTGGTCCCCGTGGTT | chr16:28884940-28884976 | 1 | 1 | 1 | 0 | 0 | - | - | - | - |
| 174841 | GCTGAGGGTGGAAGGGGATGTGAGCAGACACTCGGAACGTGTCTTGAGATTATCATCC | chr16:29395167-29395474 | 0 | 0 | 1 | 0 | 0 | - | - | - | - |
| 174918 | ACCTCCAGAGGCACCACTGGACCCCCTGTTACCATGGCAACTGGCTCTCTGGAG | chr16:29675472-29675745 | 0 | 0 | 1 | 0 | 0 | - | - | - | - |
| 174957 | CCGCCGCGCTG | chr16:29818389-29818465 | 0 | 1 | 1 | 0 | 0 | - | - | - | - |
| 174958 | GGCGGCAGC | chr16:29821419-29821464 | 0 | 1 | 1 | 0 | 0 | - | - | - | - |
| 174972 | AGGAGGAAGAAGAGGGAG | chr16:29912191-29912365 | 0 | 0 | 1 | 0 | 0 | - | - | - | - |
| 175095 | CTTCTCCTGCTTCTGCTCGCTC | chr16:30369375-30369535 | 0 | 0 | 1 | 0 | 0 | - | - | - | - |
| 175101 | GCCGGGGCTGGG | chr16:30381256-30381327 | 0 | 1 | 1 | 0 | 0 | - | - | - | - |
| 175107 | AGCACCGGCGCGTGCACACGGGCGAGAAGCCGCACGCATGCGCCGACTGCGGCACGCGCTTCGCGCAGAGCTCGGCCTGGCGCA | chr16:30429140-30429641 | 0 | 0 | 1 | 0 | 0 | - | - | - | - |
| 175144 | TGTAGGGCCGCTCGCCAGTGTGGGTGCGCTGGTGTCGAAGAGGTAAGAGCTGTCGGCGAAGGCCTTGCCGCAACGGGGACATT | chr16:30536340-30536677 | 0 | 0 | 1 | 0 | 0 | - | - | - | - |
| 175145 | TTCATAGCCAGGGCTCCGGGG | chr16:30537031-30537283 | 0 | 0 | 1 | 0 | 0 | - | - | - | - |
| 175151 | CGGGCAGGGGTAGGGCTTCTCGCCGCTGTGGGTGCGCACTGTGGCGCCGCCAGCTCCGAGCGCTAGGCGGAAGGCAGCGCCCACAGTC | chr16:30566703-30567210 | 0 | 0 | 1 | 0 | 0 | - | - | - | - |
| 175168 | CACCAGCACAACCACCAG | chr16:30676142-30676193 | 0 | 1 | 1 | 0 | 0 | - | - | - | - |
| 175171 | GCTGCCGCCGCC | chr16:30680513-30680573 | 0 | 1 | 1 | 0 | 0 | - | - | - | - |
| 175188 | CTCCTGCCTGCACCCCTC | chr16:30748847-30748904 | 0 | 1 | 1 | 0 | 0 | - | - | - | - |
| 175191 | AGGTTGGAGCTCTGGCTGAAGCTCTTGCCGCACTCGGGGCACTTGTAGGGCTTCTCGCCGGTGTGCGTGCGCTGGTGCTGGATG | chr16:30794146-30795235 | 0 | 0 | 1 | 0 | 0 | - | - | - | - |
| 175228 | CCTCTTCCTCCTCGTCAT | chr16:30976078-30976132 | 0 | 1 | 1 | 0 | 0 | - | - | - | - |
| 175230 | CCGCCACCTCCCCCTCCC | chr16:30977014-30977110 | 0 | 1 | 1 | 0 | 0 | - | - | - | - |
| 175234 | CTCCTCATC | chr16:30982801-30982869 | 0 | 1 | 1 | 0 | 0 | - | - | - | - |
| 175238 | GAGGGGGAGGAA | chr16:30991196-30991232 | 0 | 1 | 1 | 0 | 0 | - | - | - | - |
| 175239 | CCTCCGCCCCCACCCCCGCCGCCACCGC | chr16:30991285-30991341 | 0 | 1 | 1 | 0 | 0 | - | - | - | - |
| 175272 | CGCCCTGCCCCGGAAGG | chr16:31075090-31075142 | 0 | 1 | 1 | 0 | 0 | - | - | - | - |
| 175296 | TTCCGCAGGCCCCGCCCTCTCCCTAGAGCCCACTCGGACCCGCC | chr16:31153598-31153817 | 0 | 0 | 1 | 0 | 0 | - | - | - | - |
| 175309 | TGGACAGCAGCAAAGCTA | chr16:31195604-31195693 | 0 | 1 | 1 | 0 | 0 | - | - | - | - |
| 175475 | AAACATCAGAGAATTCATACTGGAGAGAAACCTTACAAATGTAAAGAATGTAGCAAAGCCTTTAACTGTAGTTCATCCCTTACT | chr16:31766080-31767169 | 0 | 0 | 1 | 0 | 0 | - | - | - | - |
| 175497 | AATTCATACTGGAGAGAAACCTTACAAATGTAAAGAATGTGGCAAATCTTTTACTCGTTCCTCCAATCTTACTGTACATCAGAG | chr16:31926685-31928103 | 0 | 0 | 1 | 0 | 0 | - | - | - | - |
| 177774 | GTGCTTCTCCAGCAG | chr16:49670572-49670602 | 0 | 1 | 1 | 0 | 0 | - | - | - | - |
| 178283 | GCTGCTGCAGCT | chr16:52473330-52473556 | 0 | 0 | 1 | 0 | 0 | - | - | - | - |
| 178449 | CCTCTTCCTCCA | chr16:53338450-53338497 | 0 | 1 | 1 | 0 | 0 | - | - | - | - |
| 178623 | CCTCCCCCCCGAGCTCCTCCT | chr16:54319062-54319174 | 0 | 1 | 1 | 0 | 0 | - | - | - | - |
| 179173 | CTGTCTGACCCAGGTC | chr16:57088914-57088946 | 0 | 1 | 1 | 0 | 0 | - | - | - | - |
| 179435 | CTCCTCTTCAGC | chr16:57973397-57973494 | 0 | 1 | 1 | 0 | 0 | - | - | - | - |
| 179436 | CCTCCTCCTCTTCCTCTT | chr16:57983263-57983317 | 0 | 1 | 1 | 0 | 0 | - | - | - | - |
| 179446 | TGCCAGAAGCCCA | chr16:58046225-58046251 | 1 | 1 | 1 | 0 | 0 | - | - | - | - |
| 179582 | CCTGGGCCTGAG | chr16:58585617-58585641 | 1 | 1 | 1 | 0 | 0 | - | - | - | - |
| 181066 | CACCGCCACCACCAC | chr16:66503686-66503746 | 0 | 1 | 1 | 0 | 0 | - | - | - | - |
| 181090 | ACCAGAACCCGCCAAGCC | chr16:66621958-66622012 | 0 | 1 | 1 | 0 | 0 | - | - | - | - |
| 181231 | GAACCGGAGCCGAAGCAGAACCAGAGCCG | chr16:67208723-67208874 | 0 | 0 | 1 | 0 | 0 | - | - | - | - |
| 181240 | GGCGGGGCCTGAGGGGCTGAAAGCAGGGGCCTGTCAGTGG | chr16:67270620-67270814 | 0 | 0 | 1 | 0 | 0 | - | - | - | - |
| 181314 | ACTACCACAAGCCCCACCCAT | chr16:67576477-67576708 | 0 | 0 | 1 | 0 | 0 | - | - | - | - |
| 181387 | CCCGCCGCTGTC | chr16:68002495-68002570 | 0 | 1 | 1 | 0 | 0 | - | - | - | - |
| 181394 | GCCTGGGGTAGTGAG | chr16:68014064-68014139 | 0 | 1 | 1 | 0 | 0 | - | - | - | - |
| 181402 | GCCCGGCGTGGTGTGGGCTCTGGGGGC | chr16:68026947-68027028 | 0 | 1 | 1 | 0 | 0 | - | - | - | - |
| 181519 | ACTGGAGAGAAACCCTATGAATGTAATGAATGTGGGAAGCCTTTAGTCAAAGCTCATCGCTCACTCAACATGAGAGAACCCAC | chr16:68598247-68598671 | 0 | 0 | 1 | 0 | 0 | - | - | - | - |
| 181727 | CAGCAACAGCAG | chr16:69727529-69727577 | 0 | 1 | 1 | 0 | 0 | - | - | - | - |
| 181728 | AGCTTCTATTTTCAATGTCTCTGCAGACTGTAGTCAGCTTTTA | chr16:69728969-69729055 | 0 | 1 | 1 | 0 | 0 | - | - | - | - |
| 181938 | GTGGGCAGCCCAGCA | chr16:70698177-70698207 | 0 | 1 | 1 | 0 | 0 | - | - | - | - |
| 181970 | CTTCTCCAGGCGCTCCTCTCCGTCCTGCTC | chr16:70954664-70954759 | 0 | 1 | 1 | 0 | 0 | - | - | - | - |
| 182068 | TCCCACACTCATTACACTCATAGGGTTTCTCTCCAGTGTGGATTCTCTGATGCTGATTAATTTCGCATTAACACTGAAGGCCTT | chr16:71482480-71483572 | 0 | 0 | 1 | 0 | 0 | - | - | - | - |
| 182120 | GAGGAAGAGGAAGAG | chr16:71748519-71748549 | 0 | 1 | 1 | 0 | 0 | - | - | - | - |
| 182150 | TGCCCA | chr16:71956506-71956541 | 0 | 1 | 1 | 0 | 0 | - | - | - | - |
| 182247 | CCGCCGCCGCCGCCGCCACCGCCA | chr16:72821594-72821666 | 0 | 1 | 1 | 0 | 0 | - | - | - | - |
| 182248 | GCTGCTGCTGCTGCACTTGCCGCT | chr16:72821988-72822084 | 0 | 1 | 1 | 0 | 0 | - | - | - | - |
| 182252 | TGTTGTTGCTGC | chr16:72831364-72831412 | 0 | 1 | 1 | 0 | 0 | - | - | - | - |
| 182271 | CCTCTTCTTCCTCCT | chr16:72992576-72992666 | 0 | 1 | 1 | 0 | 0 | - | - | - | - |
| 182557 | TCCCTCTTCCACCCTCAGTGGATGATAATATCAAGGAGTATCCTCCTGC | chr16:74425461-74425683 | 0 | 0 | 1 | 0 | 0 | - | - | - | - |
| 182600 | GCTGCTGCTGCTGTT | chr16:74640739-74640814 | 0 | 1 | 1 | 0 | 0 | - | - | - | - |
| 182606 | GGAGCTGGCTGGAGGAGGGATGGTCCCCCTTGGCTGCTGACCACCTCAGCA | chr16:74695126-74695326 | 0 | 0 | 1 | 0 | 0 | - | - | - | - |
| 183484 | CCCCGCCGC | chr16:79633068-79633159 | 0 | 1 | 1 | 0 | 0 | - | - | - | - |
| 183485 | GGCCGGCGGCGTGGTGGTGGT | chr16:79633208-79633249 | 0 | 1 | 1 | 0 | 0 | - | - | - | - |
| 184506 | TCTCTGCCTCTGTCTG | chr16:84014402-84014450 | 0 | 1 | 1 | 0 | 0 | - | - | - | - |
| 184545 | CCTGTGGAGGTTAAAGGAGAGGATGGAGATCGAGAGCCAGAGGGGACCCTCCCAGCTGAGACCCTGCTACTGTCGCCA | chr16:84203631-84203943 | 0 | 0 | 1 | 0 | 0 | - | - | - | - |
| 184779 | GGTTTAATACAGCAGCACACGTACCCGCAGTGGCGGACGCGCTCG | chr16:85015406-85015541 | 0 | 1 | 1 | 0 | 0 | - | - | - | - |
| 184992 | GAGCGC | chr16:85689982-85690108 | 0 | 1 | 1 | 0 | 0 | - | - | - | - |
| 185694 | CTCCAAGCACCCACAGAGAGAGGAACTATG | chr16:87369525-87369763 | 0 | 0 | 1 | 0 | 0 | - | - | - | - |
| 185709 | GCGGGGGTGCCGGCGGGCT | chr16:87445568-87445625 | 0 | 1 | 1 | 0 | 0 | - | - | - | - |
| 185862 | CCCACGCCGCGCCTCGCCCGTCTC | chr16:87759776-87760377 | 0 | 0 | 1 | 0 | 0 | - | - | - | - |
| 185879 | GCCCTTCTT | chr16:87799463-87799499 | 0 | 1 | 1 | 0 | 0 | - | - | - | - |
| 186326 | GCGCCCCCCGGCCCAGCCCGC | chr16:88600214-88600298 | 0 | 1 | 1 | 0 | 0 | - | - | - | - |
| 186339 | CGATGATGGAGAAAT | chr16:88644100-88644130 | 0 | 1 | 1 | 0 | 0 | - | - | - | - |
| 186346 | AGCGCG | chr16:88677709-88677886 | 0 | 0 | 1 | 0 | 0 | - | - | - | - |
| 186373 | TGGGGGGCACCTGCCCGTGCCCCAGCCTCACTGGCCTCTCCCTCATCCCGGAAGGCGGGGCTGTCGGTGGGGGG | chr16:88778833-88779054 | 0 | 0 | 1 | 0 | 0 | - | - | - | - |
| 186375 | GCCCCTGAGAGCCCCCCTTCCCCGGGCCCTGACCCCCACTCAT | chr16:88779318-88779740 | 0 | 0 | 1 | 0 | 0 | - | - | - | - |
| 186383 | GATGCCCCACACCTGCGCGGCAGAGGGGGCTGCACAGCTGCCCAGCGCACCCCACCCAGGC | chr16:88802804-88803043 | 0 | 0 | 1 | 0 | 0 | - | - | - | - |
| 186438 | CGGTCCCCGTCCCCACGCGTCCCACGGGGCGAGGTTGGTG | chr16:88902316-88902637 | 0 | 0 | 1 | 0 | 0 | - | - | - | - |
| 186443 | CCAAACCCCAGCATCGCCTGCGTGCGTGCACGATGGGGCCGCTCCACGGCCAGC | chr16:88909378-88909485 | 0 | 1 | 1 | 0 | 0 | - | - | - | - |
| 186525 | TCTGTTCACCCGTCCCCTGGACCGGCACCGCCACAGAGGGTCAGAGTGTTGGCACCTGTCTTCCGGA | chr16:89016598-89017738 | 0 | 0 | 1 | 0 | 0 | - | - | - | - |
| 186719 | TAACCAGAGCCCCTTTTCCTCAGGGGACACCGTGGTGTTTAAGGATGGCCAGT | chr16:89211545-89211704 | 0 | 0 | 1 | 0 | 0 | - | - | - | - |
| 186757 | CCTGGCCCAGGAACCCGGCCCCCAGCACCAGGCCCAGCCCGGCCCCCCTGTGGGACAGAGTGTGTTGGGGGCAGCCAGCCT | chr16:89262666-89262907 | 0 | 0 | 1 | 0 | 0 | - | - | - | - |
| 186774 | CGAGCACATAAGAACTCACACAGGAGAGAAACCTTACATATGTAACGAGTGTGGGAAAGCCTTCACCACATCCTCACACCTTAT | chr16:89294510-89295016 | 0 | 0 | 1 | 0 | 0 | - | - | - | - |
| 186781 | GCACTGCGTATGCAACTCAACTCGCACTGCGTATGCAACTCAACTC | chr16:89299164-89300258 | 0 | 0 | 1 | 0 | 0 | - | - | - | - |
| 186793 | GGGAGGCTCAGGGCTCCAATGGGGGGAGGCTCAGGGCTCCAATGGGGGGAGGCTCAGGGCTCCAATGGGGGGAGGCTCAGGGCTCCAGCGG | chr16:89356611-89357056 | 0 | 0 | 1 | 0 | 0 | - | - | - | - |
| 187063 | TCAGTGACCTTTCTGAGGGGTGAGAGAAGAGTGGGTTTAAACAGCCTAAAATTTCTCCTTCAAAAACCA | chr16:89793746-89793884 | 1 | 1 | 1 | 0 | 0 | - | - | - | - |
| 187072 | AAGAAGCCAAGAAGTCGG | chr16:89799735-89799812 | 0 | 1 | 1 | 0 | 0 | - | - | - | - |
| 187097 | CCTGTGTGGAGAGAAGAGCGTGAAGCCCAGGACAGCCAGGCGCAGCTGCACCACCTAGGCAGTGT | chr16:89851371-89851566 | 0 | 0 | 1 | 0 | 0 | - | - | - | - |
| 187123 | CTTCCCCACCGCAGGTCCCG | chr16:89922426-89922527 | 0 | 1 | 1 | 0 | 0 | - | - | - | - |
| 187134 | CTGGCCCCGCTACAGCAAACCAGGTGAGGGTCTGCAGAGGCTGCTGGGGATGGAGGGCGGCGGGGGCGTGTGTTCTGTGCA | chr16:89958660-89958819 | 0 | 0 | 1 | 0 | 0 | - | - | - | - |
| 187217 | CACACCTCCCAGGACGTCCCAAGGGGCCTCAGCCCACCACA | chr16:90074262-90075199 | 0 | 0 | 1 | 0 | 0 | - | - | - | - |
| 187222 | CTACGGGGCAGCCTACGGGGCAGG | chr16:90095545-90095644 | 0 | 0 | 1 | 0 | 0 | - | - | - | - |
| 187229 | CAGGTGACCAGGTGTGTACAGGTATGGACAGGTGAGGAGGTGTGGTA | chr16:90098620-90099133 | 0 | 0 | 1 | 0 | 0 | - | - | - | - |
| 187252 | TGATGCCCAGTTCCTGGCCATACTCATCCCCAGACCAGACCAGCAGTTCACAGCCTGGCCTAATGACTCGGCAGGTTCTATAGAAGATC | chr16:90126790-90126968 | 0 | 0 | 1 | 0 | 0 | - | - | - | - |
| 187297 | GGGCTGGGACCC | chr17:30965-31000 | 0 | 1 | 1 | 0 | 0 | - | - | - | - |
| 187404 | AGAGCTCACCACCCCGGGCGTTCGTCACTGCAGACATCACTGCAGACACAGAGACGGCCATT | chr17:182873-183059 | 0 | 0 | 1 | 0 | 0 | - | - | - | - |
| 187450 | GGCCCTCAAGGGCTTCCACCCCGACCCCGA | chr17:263233-263743 | 0 | 0 | 1 | 1 | 40 | 40 | 0 | 20 | 18 |
| 187504 | GCACGCTGCTGTGTAGTGGAGAAAGGGCAGGCAGCGAGCAAGCGTGTACAAGGTATATACGTGCC | chr17:456104-456624 | 0 | 0 | 1 | 1 | 40 | 39 | 0 | 4 | 5 |
| 187581 | TCCGGTGACAGTTTACCTTTCGGAAAGCTGCCGGATCTGCGGAATCCCCATATACTTTCCC | chr17:556265-556576 | 0 | 0 | 1 | 0 | 0 | - | - | - | - |
| 187619 | AGGGTTCTGATTCAGGCATGTATGAATGAAATGGCAGAGAGAGTG | chr17:643825-644048 | 0 | 0 | 1 | 0 | 0 | - | - | - | - |
| 187685 | CACGTTACCGTTGCTCGGTTCCGGTGAAGGGG | chr17:767212-767443 | 0 | 0 | 1 | 0 | 0 | - | - | - | - |
| 187747 | TCACCCTCCGCCAGCCACGGGCCCGGGCGGTGCCAGGGTACCTGCGCCATGACGTCATGGGACCG | chr17:909973-910429 | 0 | 0 | 1 | 0 | 0 | - | - | - | - |
| 187750 | CACGAGGAGGGACTGAGGAGGTGGGGTTGGGGCCACTCCCCGTTACCTTTT | chr17:912770-912923 | 0 | 0 | 1 | 0 | 0 | - | - | - | - |
| 187788 | CTGGACTCACACACTCACCCCGCAGAGGTCAGGACCCCCTCCCCCGCCC | chr17:972988-973238 | 0 | 0 | 1 | 0 | 0 | - | - | - | - |
| 187966 | CCCCTCCCCTCCCGCACTGGGCTTCTCTCCCTGCCCCT | chr17:1385929-1386151 | 0 | 0 | 1 | 0 | 0 | - | - | - | - |
| 187970 | TGCTGGTGACGTACCTGG | chr17:1399580-1399616 | 0 | 1 | 1 | 0 | 0 | - | - | - | - |
| 187971 | GGGTCAGCGTGGGGCAGAGGGCGGGGAACAGTCTGCAGACCCAGGCTCACTCGTGG | chr17:1412019-1412477 | 0 | 0 | 1 | 0 | 0 | - | - | - | - |
| 187973 | CACCCCCCACCGCACACACACGCAGTCACTGGGAAGGCCTCAGCCGAGCTACTTACCTTATGGATGAAGTTCTCCAC | chr17:1438264-1438496 | 0 | 0 | 1 | 0 | 0 | - | - | - | - |
| 188012 | CGCTCACCTGTGTCCGCCCCGCCCCCTCCCCCGAC | chr17:1546435-1546740 | 0 | 0 | 1 | 0 | 0 | - | - | - | - |
| 188017 | GCCACACGCATCAGACTCCCACGAGACCCACCTGCTG | chr17:1548822-1548896 | 0 | 1 | 1 | 0 | 0 | - | - | - | - |
| 188019 | CCCCCGGAGCCCCGCCCAGCGCCTGCCACGCTCCGCCCCCG | chr17:1552381-1552508 | 0 | 1 | 1 | 0 | 0 | - | - | - | - |
| 188143 | GCCTGGGCTGGGGCAGGGCTGTGAGACCCTCCCTTACAGAAGCAATGAGGGCTTGAGGAGGGGGTTAGGG | chr17:1955672-1956372 | 0 | 0 | 1 | 0 | 0 | - | - | - | - |
| 188190 | AAAACTGCAGGTGACCGCCCCGTTCCCCA | chr17:2265554-2265845 | 0 | 0 | 1 | 0 | 0 | - | - | - | - |
| 188455 | GATGGCGGTGTAGTGCATGGAGGAAGCA | chr17:3336703-3336757 | 0 | 1 | 1 | 0 | 0 | - | - | - | - |
| 188506 | CGTGTTGTCGGC | chr17:3493235-3493319 | 0 | 1 | 1 | 0 | 0 | - | - | - | - |
| 188551 | GCCCAAGCCTAACCGTGACCCCAAAGACGCCTGGAAGCTGCGAGCTC | chr17:3627501-3627590 | 0 | 1 | 1 | 0 | 0 | - | - | - | - |
| 188561 | GGCCCCGCCCTCGCCCAGGTAGCCTCCA | chr17:3658058-3658423 | 0 | 0 | 1 | 0 | 0 | - | - | - | - |
| 188565 | CTTCCTCCTCCTCCTTGT | chr17:3664309-3664363 | 0 | 1 | 1 | 0 | 0 | - | - | - | - |
| 188582 | TCTTCC | chr17:3721787-3721835 | 0 | 1 | 1 | 0 | 0 | - | - | - | - |
| 188630 | CTGCAGGGAGAATCGGCTCCTGCACCCACCTCGTA | chr17:3844665-3844735 | 0 | 1 | 1 | 0 | 0 | - | - | - | - |
| 188754 | CCCCCGGCA | chr17:4402553-4402580 | 0 | 1 | 1 | 0 | 0 | - | - | - | - |
| 188765 | TCCCCCTCGCTCTCC | chr17:4448378-4448468 | 0 | 1 | 1 | 0 | 0 | - | - | - | - |
| 188802 | TCTTCTTCCTCAAA | chr17:4575469-4575630 | 0 | 0 | 1 | 0 | 0 | - | - | - | - |
| 188807 | CAGGGCCTGCTGAGGGCA | chr17:4576184-4576353 | 0 | 0 | 1 | 0 | 0 | - | - | - | - |
| 188871 | AGCCCGACCACCCCAGAGCCCACCTCAGAGCCCGCCCCC | chr17:4837118-4837278 | 0 | 1 | 1 | 0 | 0 | - | - | - | - |
| 188906 | GAGAATTCATACTGGAGAGAAACCCTATGAATGTAATGAATGTGGAAAGGCCTTCAGGCAAAGCTCACACCTTATTCACATCA | chr17:4995362-4996286 | 0 | 0 | 1 | 1 | 40 | 8 | 0 | 20 | 20 |
| 188922 | TTCCCACATTCACTACATTCATAGGGTTTCTCTCCAGTATGAATTCTCCGATGTTGTAACAAGGAGTGAACGCCGCCTAAAGGCT | chr17:5085983-5086563 | 0 | 0 | 1 | 0 | 0 | - | - | - | - |
| 188968 | CATACTTTCAGGGGAAGTTTCCCT | chr17:5365585-5365657 | 0 | 1 | 1 | 0 | 0 | - | - | - | - |
| 189235 | GGGTGGCTCTGC | chr17:6328809-6328957 | 0 | 0 | 1 | 0 | 0 | - | - | - | - |
| 189299 | CCGCGTGGAGACCTCGTCCCA | chr17:6555307-6555439 | 0 | 1 | 1 | 0 | 0 | - | - | - | - |
| 189403 | CCCCAG | chr17:7080255-7080303 | 0 | 1 | 1 | 0 | 0 | - | - | - | - |
| 189432 | CTGCTGGGGGCCAGGGGC | chr17:7192863-7192919 | 0 | 1 | 1 | 0 | 0 | - | - | - | - |
| 189436 | CATCTCCTGTTCTTCCTT | chr17:7217842-7217918 | 0 | 1 | 1 | 0 | 0 | - | - | - | - |
| 189463 | TCCTCCTCA | chr17:7366339-7366426 | 0 | 1 | 1 | 0 | 0 | - | - | - | - |
| 189467 | AGAGGA | chr17:7369787-7369872 | 0 | 1 | 1 | 0 | 0 | - | - | - | - |
| 189474 | CCCAGCTACTCACCCACCTCT | chr17:7416503-7417091 | 0 | 0 | 1 | 0 | 0 | - | - | - | - |
| 189482 | ACCTCTCCCAAGTACTCACCTACCAGTCCCAAATATTCACCC | chr17:7417148-7417400 | 0 | 0 | 1 | 0 | 0 | - | - | - | - |
| 189500 | GAGGAGGAAGAAGAGGAAGAG | chr17:7466621-7466663 | 0 | 1 | 1 | 0 | 0 | - | - | - | - |
| 189501 | CCACCAGCCACGGACCCACAACTGCCACTCACAACCCCACCACCACCAGCCATGGAAACGCCACAGTTCATCCAACAAGCAACAGCACTG | chr17:7483283-7483550 | 0 | 0 | 1 | 0 | 0 | - | - | - | - |
| 189528 | AGCCTTCCTGAAGAAGAAGCAAACGGG | chr17:7592272-7592326 | 0 | 1 | 1 | 0 | 0 | - | - | - | - |
| 189568 | CAGAAGGAGCAT | chr17:7752531-7752555 | 1 | 1 | 1 | 0 | 0 | - | - | - | - |
| 189617 | GGGCTGGGGGCT | chr17:8048244-8048280 | 0 | 1 | 1 | 0 | 0 | - | - | - | - |
| 189748 | CTCCAGCTCCTC | chr17:8660709-8660745 | 0 | 1 | 1 | 0 | 0 | - | - | - | - |
| 190188 | CTCAGGTACCTGCTCTTACCTGGCCCCCACAT | chr17:10204707-10204899 | 0 | 0 | 1 | 0 | 0 | - | - | - | - |
| 190718 | CCTGCGACATGGTGCGTC | chr17:12921191-12921227 | 0 | 1 | 1 | 0 | 0 | - | - | - | - |
| 190920 | CATGGACCTTCCCCAT | chr17:14110330-14110361 | 0 | 1 | 1 | 0 | 0 | - | - | - | - |
| 191196 | CTGGGCTGGCTGACCCAGAAT | chr17:15554805-15554847 | 0 | 1 | 1 | 0 | 0 | - | - | - | - |
| 191197 | GCAGTGGCCCTGG | chr17:15554873-15554899 | 1 | 1 | 1 | 0 | 0 | - | - | - | - |
| 191286 | TCCGTTCCCGCTCCCGC | chr17:15967417-15967469 | 0 | 1 | 1 | 0 | 0 | - | - | - | - |
| 191306 | TTCATCTTTTTTTC | chr17:16029409-16029499 | 0 | 1 | 1 | 0 | 0 | - | - | - | - |
| 191377 | GGCCGCGGA | chr17:16256663-16256699 | 0 | 1 | 1 | 0 | 0 | - | - | - | - |
| 191419 | CCCCCCGGCCCAGCACG | chr17:16394997-16395116 | 0 | 1 | 1 | 0 | 0 | - | - | - | - |
| 191426 | TGAATGCTTTCCCACATATATTACATTTATAGGGTTTCTCTCCAGTATGAATCCTTTGATGTTGAGTAAGATTTGCACTCTGGC | chr17:16455399-16456407 | 0 | 0 | 1 | 0 | 0 | - | - | - | - |
| 191565 | AATCACAAC | chr17:17124672-17124699 | 0 | 1 | 1 | 0 | 0 | - | - | - | - |
| 191721 | CTGCCACTGCCACCTG | chr17:17721049-17721094 | 0 | 1 | 1 | 0 | 0 | - | - | - | - |
| 191767 | CGCCGGGCCCACCCAGGCTCGCCGCT | chr17:18024607-18024760 | 0 | 0 | 1 | 0 | 0 | - | - | - | - |
| 191768 | CCCAAGGATGTCACTCCC | chr17:18025216-18025269 | 0 | 1 | 1 | 0 | 0 | - | - | - | - |
| 191777 | GCCGCCGCCGCAGCC | chr17:18087644-18087706 | 0 | 1 | 1 | 0 | 0 | - | - | - | - |
| 191889 | TTTTCCCACACTCACTACATTCATAGGGTTTCTCTCCAGTATGAATTCTCTGATGTTGAACAAGATGTGTGCTCTGACTGAAGG | chr17:18565311-18565980 | 0 | 0 | 1 | 0 | 0 | - | - | - | - |
| 192042 | CCTGCCTGCCCACCCCACTGGC | chr17:19285506-19285610 | 0 | 1 | 1 | 0 | 0 | - | - | - | - |
| 193090 | CGGGGCCGGACAGACCCTACGATTACG | chr17:27044595-27044731 | 0 | 1 | 1 | 0 | 0 | - | - | - | - |
| 193139 | GTGGTGATGGTG | chr17:27308402-27308483 | 0 | 1 | 1 | 0 | 0 | - | - | - | - |
| 193154 | CTTCTCCCGCTGCAG | chr17:27421998-27422062 | 0 | 1 | 1 | 0 | 0 | - | - | - | - |
| 193163 | CTCCTTTTT | chr17:27493880-27493939 | 0 | 1 | 1 | 0 | 0 | - | - | - | - |
| 193339 | ACAAGGATCACGCAGAGAGTCAGTTGCAGA | chr17:28380726-28380906 | 0 | 0 | 1 | 0 | 0 | - | - | - | - |
| 193364 | ACAGCCCACCCGGGTC | chr17:28548402-28548621 | 0 | 0 | 1 | 0 | 0 | - | - | - | - |
| 193369 | TGCAGGGGGGATGCCGGGGG | chr17:28564157-28564483 | 0 | 0 | 1 | 0 | 0 | - | - | - | - |
| 193412 | GGGCCCGACGCTGCC | chr17:28706334-28706378 | 0 | 1 | 1 | 0 | 0 | - | - | - | - |
| 193537 | AAAAAATCTAAG | chr17:29164251-29164287 | 0 | 1 | 1 | 0 | 0 | - | - | - | - |
| 193544 | GAAGAAAGCAAAACCAGAGAC | chr17:29220674-29220736 | 0 | 1 | 1 | 0 | 0 | - | - | - | - |
| 193635 | GGGCGGCGGC | chr17:29718790-29718879 | 0 | 1 | 1 | 0 | 0 | - | - | - | - |
| 194267 | GAGGAGGAGGAA | chr17:33289071-33289121 | 0 | 1 | 1 | 0 | 0 | - | - | - | - |
| 194427 | GGCTATGGTGGAGACAGAAGTGGGGGT | chr17:34171551-34172022 | 0 | 0 | 1 | 0 | 0 | - | - | - | - |
| 194909 | CCGGACGGCAGC | chr17:36718430-36718478 | 0 | 1 | 1 | 0 | 0 | - | - | - | - |
| 194944 | CCTCCTCCTCCTCTT | chr17:36872018-36872062 | 0 | 1 | 1 | 0 | 0 | - | - | - | - |
| 194946 | CTGCCCTGCCTG | chr17:36876753-36876816 | 0 | 1 | 1 | 0 | 0 | - | - | - | - |
| 194956 | TGTGCTTCTTTTTCT | chr17:36966772-36966832 | 0 | 1 | 1 | 0 | 0 | - | - | - | - |
| 195170 | CTTCCTCCTCCTCCT | chr17:37762578-37762638 | 0 | 1 | 1 | 0 | 0 | - | - | - | - |
| 195177 | AGAGGAAGA | chr17:37790247-37790301 | 0 | 1 | 1 | 0 | 0 | - | - | - | - |
| 195368 | AATCCAGAACCCCGCCA | chr17:38859631-38859703 | 0 | 1 | 1 | 0 | 0 | - | - | - | - |
| 195381 | CCGCCGGAGCTGCCGCCGCCGTAGCCG | chr17:38975095-38975410 | 0 | 0 | 1 | 0 | 0 | - | - | - | - |
| 195392 | CTCCTCCAAAGC | chr17:38978425-38978641 | 0 | 0 | 1 | 0 | 0 | - | - | - | - |
| 195437 | GCAGCAGGACTGGGCG | chr17:39190596-39190660 | 0 | 1 | 1 | 0 | 0 | - | - | - | - |
| 195439 | GCAGCAGCTGGTCTG | chr17:39190830-39191061 | 0 | 0 | 1 | 0 | 0 | - | - | - | - |
| 195445 | CTGGCAGCAGCTTGG | chr17:39197388-39197585 | 0 | 0 | 1 | 0 | 0 | - | - | - | - |
| 195466 | GCTCAGCAGGAGGAGGTCCTGCAGGTGGTGCTGCAAGGGGTCGGCTGGCCGCAGGGGGACTGCACAGACACAGGCTGGCAGCAGGTGGTG | chr17:39210999-39211533 | 0 | 0 | 1 | 0 | 0 | - | - | - | - |
| 195485 | CTGCTGCCACCCCAGCTGCTGCATCTCCAG | chr17:39240676-39240946 | 0 | 0 | 1 | 0 | 0 | - | - | - | - |
| 195490 | GGCAGCAGCTGGGGC | chr17:39253885-39254260 | 0 | 0 | 1 | 0 | 0 | - | - | - | - |
| 195501 | GTGCTGCATCTCCAGCTGCTGTCAAGCCCCA | chr17:39261993-39262278 | 0 | 0 | 1 | 0 | 0 | - | - | - | - |
| 195505 | GGCAGCAGCTGGGGT | chr17:39274086-39274533 | 0 | 0 | 1 | 0 | 0 | - | - | - | - |
| 195509 | CAGCAGCAGGGGCGGCAGCAGCTGGAGATCA | chr17:39279877-39280314 | 0 | 0 | 1 | 0 | 0 | - | - | - | - |
| 195521 | GGCAGCAGCACGGGC | chr17:39296228-39296720 | 0 | 0 | 1 | 0 | 0 | - | - | - | - |
| 195530 | CAGCAGCTGGGGCGG | chr17:39305717-39305972 | 0 | 0 | 1 | 0 | 0 | - | - | - | - |
| 195535 | CAGCAGGTGGGCTAGCAGCATAGAGACTGGCAGCACTGGGGCCTGCAGCAGCTGGACACACAGCAGCTGGGGCAG | chr17:39316431-39316912 | 0 | 0 | 1 | 0 | 0 | - | - | - | - |
| 195552 | CAGCAGCTGGGCATGCAGCAGCTAGAGATACAGCAGCTCGGGCGGCAGCAGGAGGGCTGG | chr17:39323930-39324414 | 0 | 0 | 1 | 0 | 0 | - | - | - | - |
| 195558 | AGCAGGTGGGCGGCAGCAGGTGGACTGACACAGCAGCTGGGGCGGC | chr17:39334025-39334355 | 0 | 0 | 1 | 0 | 0 | - | - | - | - |
| 195565 | CAGCAGCTGGGGCTGACAGCAGAGTTGCACGG | chr17:39340681-39341032 | 0 | 0 | 1 | 0 | 0 | - | - | - | - |
| 195573 | TGCTGCAGGACAACC | chr17:39346174-39346276 | 0 | 1 | 1 | 0 | 0 | - | - | - | - |
| 195574 | TGCTGTCAAAACTACCTGCTGCAGCACCACCCTGCTGCCAGCCCACCTGCTGTGGGTCCAGC | chr17:39346303-39346928 | 0 | 0 | 1 | 0 | 0 | - | - | - | - |
| 195597 | CCTGCTGTCAGCACA | chr17:39394508-39394609 | 0 | 1 | 1 | 0 | 0 | - | - | - | - |
| 195606 | TGCTGCAGGACCACC | chr17:39406008-39406224 | 0 | 0 | 1 | 0 | 0 | - | - | - | - |
| 195610 | CACCTGCTGCCAGCC | chr17:39411798-39412078 | 0 | 0 | 1 | 0 | 0 | - | - | - | - |
| 195616 | CTACCTGCTGCAGGA | chr17:39421660-39421762 | 0 | 1 | 1 | 0 | 0 | - | - | - | - |
| 195617 | CACCTGCTGCAGCC | chr17:39421805-39421948 | 0 | 0 | 1 | 0 | 0 | - | - | - | - |
| 195631 | ACCTGCTGCAGGACCACCTGCTGCCAGCCCACCTGTGTGACC | chr17:39431982-39432477 | 0 | 0 | 1 | 0 | 0 | - | - | - | - |
| 195644 | ACAGGTTGGCAGCAGCTGCTCACGGAGCAAGAAGGCTCACAAATGGTGGCCTCACAGCAC | chr17:39464990-39465350 | 0 | 0 | 1 | 1 | 10 | 9 | 0 | 5 | 5 |
| 195647 | CCCACAGCAACTGGA | chr17:39471626-39471821 | 0 | 0 | 1 | 0 | 0 | - | - | - | - |
| 195664 | GCTCACCTCCTCCCCATGCTCACCTCCTCCCCAT | chr17:39635297-39635609 | 0 | 0 | 1 | 0 | 0 | - | - | - | - |
| 195667 | CAGGGCACAGAGGGGACA | chr17:39642733-39642769 | 0 | 1 | 1 | 0 | 0 | - | - | - | - |
| 195670 | CAGAGGCACTAGAAGTCGTGGTAA | chr17:39657539-39657587 | 0 | 1 | 1 | 0 | 0 | - | - | - | - |
| 195671 | CAAAGCCACCTC | chr17:39661534-39661679 | 0 | 0 | 1 | 0 | 0 | - | - | - | - |
| 195675 | CCACCAACGCCACCACCAAAGCCACCACCGAAAACCC | chr17:39674783-39674893 | 0 | 1 | 1 | 0 | 0 | - | - | - | - |
| 195686 | TAGCTGCCCCCACTTCCTCCTCCAGACCCACTTCCTCCACCA | chr17:39723597-39723966 | 0 | 0 | 1 | 0 | 0 | - | - | - | - |
| 195691 | AGCCACCACCAA | chr17:39727865-39728051 | 0 | 0 | 1 | 0 | 0 | - | - | - | - |
| 195694 | CCACCACCAAAG | chr17:39742766-39742850 | 0 | 1 | 1 | 0 | 0 | - | - | - | - |
| 195751 | CCTCCTCTTCTTCAT | chr17:39888261-39888306 | 0 | 1 | 1 | 0 | 0 | - | - | - | - |
| 195849 | CTGAAGCTGAGGAGAGAGAGAGAGTCAGGGACGGGGGG | chr17:40270029-40270187 | 0 | 0 | 1 | 0 | 0 | - | - | - | - |
| 195862 | GCAGCAGCC | chr17:40323955-40324009 | 0 | 1 | 1 | 0 | 0 | - | - | - | - |
| 195944 | GGCCGAGGCTGG | chr17:40706841-40706915 | 0 | 1 | 1 | 0 | 0 | - | - | - | - |
| 195966 | CCAGCC | chr17:40850829-40850878 | 0 | 1 | 1 | 0 | 0 | - | - | - | - |
| 195983 | CCTGGAACACCCATTTTCC | chr17:40946875-40946927 | 0 | 1 | 1 | 0 | 0 | - | - | - | - |
| 196058 | ACTGGAACCTACTTCATTAAT | chr17:41244355-41244418 | 0 | 1 | 1 | 0 | 0 | - | - | - | - |
| 196159 | CCGCTCCATCCGG | chr17:41622976-41623026 | 0 | 1 | 1 | 0 | 0 | - | - | - | - |
| 196257 | TCCTCCTCCTCCTCCTCCATCGTCT | chr17:42164864-42164933 | 0 | 1 | 1 | 0 | 0 | - | - | - | - |
| 196258 | CTGCCGCTGCTGCTCCAG | chr17:42170751-42170859 | 0 | 1 | 1 | 0 | 0 | - | - | - | - |
| 196290 | TCATCCTCATCCTCG | chr17:42284915-42284960 | 0 | 1 | 1 | 0 | 0 | - | - | - | - |
| 196326 | CAGGCGGCGGCGGCGCGGG | chr17:42431409-42431498 | 0 | 1 | 1 | 0 | 0 | - | - | - | - |
| 196454 | AGGACACCTTGGTGGTC | chr17:43003415-43003465 | 0 | 1 | 1 | 0 | 0 | - | - | - | - |
| 196506 | CAAAAAGAAGAAGAAAGAAA | chr17:43159041-43159079 | 0 | 1 | 1 | 0 | 0 | - | - | - | - |
| 196543 | TCTGGG | chr17:43333360-43333396 | 0 | 1 | 1 | 0 | 0 | - | - | - | - |
| 196550 | CCAGGTGTGGGCCAGGCAAGGGCTTCTGGACTGTCTACACAGGCCAGTTTGC | chr17:43363994-43364096 | 0 | 1 | 1 | 0 | 0 | - | - | - | - |
| 196572 | AAGGCGCTCAGAGGTAGCCCCGCCCACTCCAGCCCCGCCCCTCACCCTCGGGTCCCTGGGTCTGTGGGAGCAGGAGGCGGGGTCA | chr17:43482658-43483082 | 0 | 0 | 1 | 0 | 0 | - | - | - | - |
| 196919 | CCAGCCCCTGCA | chr17:45286848-45286883 | 0 | 1 | 1 | 0 | 0 | - | - | - | - |
| 197025 | GCTCCCCCGTGCCCCCCGTGCC | chr17:45786167-45786339 | 0 | 0 | 1 | 0 | 0 | - | - | - | - |
| 197041 | ACCCTACCTTGTGCCAGCCC | chr17:45897310-45897349 | 0 | 1 | 1 | 0 | 0 | - | - | - | - |
| 197081 | TTCTTCCTC | chr17:46136171-46136237 | 0 | 1 | 1 | 0 | 0 | - | - | - | - |
| 197278 | CGGCGGGCCCCGGGG | chr17:46985896-46985926 | 0 | 1 | 1 | 0 | 0 | - | - | - | - |
| 197555 | CCAGGAGCA | chr17:48265933-48265996 | 0 | 1 | 1 | 0 | 0 | - | - | - | - |
| 197556 | CACCAGGTTCGCCGTCAG | chr17:48267429-48267465 | 0 | 1 | 1 | 0 | 0 | - | - | - | - |
| 197557 | GGGGGTCCGGGAGGTCCG | chr17:48276599-48276729 | 0 | 1 | 1 | 0 | 0 | - | - | - | - |
| 197625 | AGAAAGGGAAGAGGAAGAGAAGAGAAAA | chr17:48823175-48823258 | 0 | 1 | 1 | 0 | 0 | - | - | - | - |
| 198627 | GAGGGAGCTTGGATAGAAATGAGGAGGGCTTGGATAGAAATGAG | chr17:55183725-55183851 | 0 | 1 | 1 | 0 | 0 | - | - | - | - |
| 198730 | TCCAGTGGTGGTTGGAATTACCCGGGCCGCGCCCCTACCTCCGGGGGGATGCTGTCC | chr17:55962494-55962608 | 0 | 1 | 1 | 0 | 0 | - | - | - | - |
| 198824 | GCACCATCTCCTCACCT | chr17:56399983-56400016 | 0 | 1 | 1 | 0 | 0 | - | - | - | - |
| 198904 | GAACCC | chr17:56833457-56833517 | 0 | 1 | 1 | 0 | 0 | - | - | - | - |
| 199274 | GGATGTTCTCGGGCAAGGAGC | chr17:58603174-58603235 | 0 | 1 | 1 | 0 | 0 | - | - | - | - |
| 199751 | CAGCAGCCA | chr17:61497468-61497512 | 0 | 1 | 1 | 0 | 0 | - | - | - | - |
| 199769 | GCTGCTGCTGCCGCTGCC | chr17:61554487-61554541 | 0 | 1 | 1 | 0 | 0 | - | - | - | - |
| 199843 | CTCCCCCGCCCCGTCCAGC | chr17:62029020-62029056 | 0 | 1 | 1 | 0 | 0 | - | - | - | - |
| 199850 | CCACGTGTCATTGCCGTA | chr17:62045446-62045554 | 0 | 1 | 1 | 0 | 0 | - | - | - | - |
| 200644 | CGGGCCCCTCCCACCCGGCCCCG | chr17:65821723-65821971 | 0 | 0 | 1 | 0 | 0 | - | - | - | - |
| 200646 | CGGGGGGCGGCGAGGA | chr17:65822113-65822161 | 0 | 1 | 1 | 0 | 0 | - | - | - | - |
| 200647 | GAGGAGGAGGAAGAGGAGGACAGGCGACGCC | chr17:65822236-65822392 | 0 | 0 | 1 | 0 | 0 | - | - | - | - |
| 200663 | CAGCTCAGCCCCAGTCCC | chr17:65941650-65941723 | 0 | 1 | 1 | 0 | 0 | - | - | - | - |
| 200671 | CCAGCCCCT | chr17:65955752-65955806 | 0 | 1 | 1 | 0 | 0 | - | - | - | - |
| 201498 | GGCGCCCCCGCAGCAGCAGGC | chr17:70120068-70120151 | 0 | 1 | 1 | 0 | 0 | - | - | - | - |
| 202210 | GGTTCCATGGGCTCCGTG | chr17:72889649-72889703 | 0 | 1 | 1 | 0 | 0 | - | - | - | - |
| 202252 | GGCACGGGAACCTTCAGCGCATTAAACTACAAACACAAG | chr17:73036232-73036310 | 1 | 1 | 1 | 0 | 0 | - | - | - | - |
| 202340 | CCCCGAGGCCCACGGTGCACCCCGTGGAGGTCACACCTTCCC | chr17:73500175-73500301 | 0 | 1 | 1 | 0 | 0 | - | - | - | - |
| 202351 | CGAGGGGCGGGGCCGCGGGAAAGCGGA | chr17:73585346-73585615 | 0 | 0 | 1 | 0 | 0 | - | - | - | - |
| 202398 | CCGGGGCCGGG | chr17:73874337-73874395 | 0 | 1 | 1 | 0 | 0 | - | - | - | - |
| 202404 | CGGGGCCGGGAT | chr17:73892756-73892792 | 0 | 1 | 1 | 0 | 0 | - | - | - | - |
| 202444 | TGGGGGACCCCT | chr17:74023194-74023245 | 0 | 1 | 1 | 0 | 0 | - | - | - | - |
| 202453 | ACCGCCGCCGCCACTGCC | chr17:74068494-74068548 | 0 | 1 | 1 | 0 | 0 | - | - | - | - |
| 202467 | ATCTGGGAAGGAAGTGGCTCGCCTGGTCTCCTGATCTTACCTGGCAATACCATTCTGGAACTCTTCCGTGGCCTGGTAATA | chr17:74163610-74163772 | 0 | 0 | 1 | 0 | 0 | - | - | - | - |
| 202497 | TGCACCATACCCAGCTGACCTGCACCAGGC | chr17:74288039-74289212 | 0 | 0 | 1 | 0 | 0 | - | - | - | - |
| 202831 | TCAAGACCATCACACACAGTCAGTGGCCGGGAGTGGGCTGGGGGTGCAGGACGCCCCTGCCTTCCTGGAGCACAGGGGTTGGGGG | chr17:75483616-75483959 | 0 | 0 | 1 | 0 | 0 | - | - | - | - |
| 203213 | CCCCTCGCCCGGTGCACACCCACGCGGTCCCCCAA | chr17:76798145-76798420 | 0 | 0 | 1 | 0 | 0 | - | - | - | - |
| 203628 | CCCGCTCCCGCTCCCTCTCCCGTTCTCGAT | chr17:77769062-77769152 | 0 | 1 | 1 | 0 | 0 | - | - | - | - |
| 203713 | TGCACGAACAACACGGGACGCACGCAGGCACG | chr17:78063943-78064286 | 0 | 0 | 1 | 0 | 0 | - | - | - | - |
| 203744 | CACCTGCCCACATGCT | chr17:78157523-78157715 | 0 | 0 | 1 | 0 | 0 | - | - | - | - |
| 203875 | GAACGCGGTGGTGAGAGCACACGTCCTCGTCTCGTTCCTGATC | chr17:78409941-78410156 | 0 | 0 | 1 | 0 | 0 | - | - | - | - |
| 204131 | GGCCCAGGCCCCGCCTCCCATCATGTCACG | chr17:79093427-79093744 | 0 | 0 | 1 | 0 | 0 | - | - | - | - |
| 204188 | CCCACCTGGGGCAGCCCCCAACCCCTG | chr17:79166038-79166150 | 0 | 1 | 1 | 0 | 0 | - | - | - | - |
| 204189 | TGGTGAGGGGCCTCCTCCCCCTGGGGGCCAGGTGCGGGC | chr17:79171342-79171536 | 0 | 0 | 1 | 0 | 0 | - | - | - | - |
| 204319 | GAGGAAGACGAGCTG | chr17:79414564-79414629 | 0 | 1 | 1 | 0 | 0 | - | - | - | - |
| 204323 | GGAGGGCAGGGGTTGCTGGGTAACCAGGAG | chr17:79424598-79425142 | 0 | 0 | 1 | 0 | 0 | - | - | - | - |
| 204324 | AGGCCGAGAAGGGTGG | chr17:79428251-79428282 | 0 | 1 | 1 | 0 | 0 | - | - | - | - |
| 204436 | GCCGCCCCGGCC | chr17:79849336-79849385 | 0 | 1 | 1 | 0 | 0 | - | - | - | - |
| 204447 | GGGGCCCCAGGCCGGCGCCAAG | chr17:79880551-79880617 | 0 | 1 | 1 | 0 | 0 | - | - | - | - |
| 204494 | AGCAGG | chr17:79954663-79954723 | 0 | 1 | 1 | 0 | 0 | - | - | - | - |
| 204502 | AGCCCGTGGACCGGG | chr17:79966910-79966967 | 0 | 1 | 1 | 0 | 0 | - | - | - | - |
| 204521 | GGGAGAGGGCAGGGTGGGCAGGGCTGCGGGGAGAAGGTGGGGGTGGGGAGTGGCCACT | chr17:80039725-80039896 | 0 | 0 | 1 | 0 | 0 | - | - | - | - |
| 204559 | CCAGCTTGGACAGACCCTCCTGCTTGA | chr17:80121160-80121240 | 0 | 1 | 1 | 0 | 0 | - | - | - | - |
| 204655 | GCAGGGAGGGCAGAGGCCCTCTGGCGGG | chr17:80274140-80274248 | 0 | 1 | 1 | 0 | 0 | - | - | - | - |
| 204721 | CTCACCCTGCCCACGTGCGCG | chr17:80361597-80361828 | 0 | 0 | 1 | 0 | 0 | - | - | - | - |
| 204748 | GCCACGGGTCCTGTGGGCGGTGCACGGGCTCAGGCACACCGGGAATGT | chr17:80401640-80401880 | 0 | 0 | 1 | 0 | 0 | - | - | - | - |
| 204771 | GGGCGGCGGGGCCGG | chr17:80477811-80477894 | 0 | 1 | 1 | 0 | 0 | - | - | - | - |
| 204785 | GGAGACCACAGGGAGGTCAAAGGTGGGCCGGGGGGGAAAGGAGGAGAGG | chr17:80544054-80544444 | 0 | 0 | 1 | 0 | 0 | - | - | - | - |
| 204858 | CCCCTCCCCAGCCCCGCG | chr17:80656260-80656333 | 0 | 1 | 1 | 0 | 0 | - | - | - | - |
| 204927 | CGAAGATGACGA | chr17:80763834-80763858 | 1 | 1 | 1 | 0 | 0 | - | - | - | - |
| 204933 | GGGGGATGTCTGGCGCTGGCAGAGCTGGGCAGGAGAGGCCTGTTGCTGCCATCTCGACTCGTGGATGGTGAGTAGCTGAAGCACGGTCAG | chr17:80772743-80772923 | 0 | 0 | 1 | 0 | 0 | - | - | - | - |
| 205258 | GTGGGCATGTGTTCCCTGAGCGGTACAAAATAACCAGTGAGGATGGCATATACTCTTAATAATAAATACTCATAAAGTGGTGGCAGGACAAGATT | chr18:218954-219526 | 0 | 0 | 1 | 0 | 0 | - | - | - | - |
| 205261 | AGTATGTATTTACCTTTCTTTC | chr18:224888-224932 | 1 | 1 | 1 | 0 | 0 | - | - | - | - |
| 205340 | CCGCGCCACTTGGCCTGCCTCCGTCCCG | chr18:657645-657756 | 0 | 1 | 1 | 0 | 0 | - | - | - | - |
| 205347 | CCGCGCTTACCATGGCGT | chr18:712349-712511 | 0 | 0 | 1 | 0 | 0 | - | - | - | - |
| 205707 | AGGATGACTTTTCCTACTCCTTGAGGACACTCACTCACTTTCTCTTTGAATCTC | chr18:2960560-2960665 | 0 | 1 | 1 | 0 | 0 | - | - | - | - |
| 205750 | GACTGCTTGGATGCCGTG | chr18:3188857-3188983 | 0 | 1 | 1 | 0 | 0 | - | - | - | - |
| 206078 | GCGCCCCCGCGCGCCTCCT | chr18:5489088-5489124 | 0 | 1 | 1 | 0 | 0 | - | - | - | - |
| 206135 | GCGGCGGCGGCC | chr18:5891373-5891409 | 0 | 1 | 1 | 0 | 0 | - | - | - | - |
| 206731 | AAAGAAGAAAAGCAT | chr18:9516991-9517067 | 0 | 1 | 1 | 0 | 0 | - | - | - | - |
| 206737 | AAAATTAGAAAACAAGGTTTC | chr18:9577011-9577070 | 0 | 1 | 1 | 0 | 0 | - | - | - | - |
| 206805 | CCCAAGTCCCCAGAAGAAGCCATCCAGCCCAAGGAGGGTGACATC | chr18:9886743-9887823 | 0 | 0 | 1 | 1 | 40 | 28 | 12 | 16 | 16 |
| 206985 | TCATACATACCATCATA | chr18:10796791-10797378 | 0 | 0 | 1 | 0 | 0 | - | - | - | - |
| 207138 | AGGAGCGCGAGGCGGCCA | chr18:11689812-11689866 | 0 | 1 | 1 | 0 | 0 | - | - | - | - |
| 207693 | TTTCTCTCCAGTATGGATTCTCTGATGTTGAGTAAGGTGTGAGCCTCTGTTAAAAGCTTTGCCACATTCTTTACATTTGAAAGG | chr18:14104828-14106080 | 0 | 0 | 1 | 0 | 0 | - | - | - | - |
| 208107 | AGGAAG | chr18:19209026-19209086 | 0 | 1 | 1 | 0 | 0 | - | - | - | - |
| 208573 | AAAGAAAATGAGCAGTCA | chr18:21736446-21736482 | 1 | 1 | 1 | 0 | 0 | - | - | - | - |
| 208812 | CTGCTGCTGCCCTGGGTAA | chr18:23614975-23615030 | 0 | 1 | 1 | 0 | 0 | - | - | - | - |
| 208887 | CTCGTCCCCTCCAGCCCCACCACCTCCGTCCTCCTCCTCCTC | chr18:24128191-24128323 | 0 | 1 | 1 | 0 | 0 | - | - | - | - |
| 209666 | GGCCGCAGG | chr18:28991290-28991327 | 0 | 1 | 1 | 0 | 0 | - | - | - | - |
| 209915 | CTGCGGCGGCGGCTGCTG | chr18:30350251-30350305 | 0 | 1 | 1 | 0 | 0 | - | - | - | - |
| 210080 | TCCAACTTACCTTTAACATCAGAAACATCACCAGATA | chr18:31319453-31319673 | 0 | 0 | 1 | 0 | 0 | - | - | - | - |
| 210279 | CATCAGAGAATTCATACTGGTGAGAAACCTTATGAATGTAATGAATGTGGAAAAGCTTTCAGTCAGAGCTCAGAACTCATTAGA | chr18:32825659-32826330 | 0 | 0 | 1 | 0 | 0 | - | - | - | - |
| 210281 | TACATTCATAAGGCTTCTCTCCAGTGTGAATTCTCTGATGCTGAATAAGGGCTGAGCTCCGACTGAAGGCTTTTCCACATTCAT | chr18:32833484-32834072 | 0 | 0 | 1 | 1 | 40 | 35 | 0 | 20 | 20 |
| 210290 | AAAGCTTTCAGTCAGAGCTCAGATCTTATTAAACATCAGAGAATCCACACTGGAGAGAAACCATATAAATGTAATCAGTGTGGA | chr18:32886268-32887860 | 0 | 0 | 1 | 0 | 0 | - | - | - | - |
| 210384 | ATGCTCATGGTCTGAGTG | chr18:33706568-33706694 | 0 | 1 | 1 | 0 | 0 | - | - | - | - |
| 210460 | GAACCCGAAGCAGAGGCA | chr18:34289074-34289110 | 0 | 1 | 1 | 0 | 0 | - | - | - | - |
| 211728 | CGCCGCCCCTGCCCCCGCCACCGC | chr18:42643427-42643522 | 0 | 1 | 1 | 0 | 0 | - | - | - | - |
| 211979 | CTCCTCTGACGAGGA | chr18:44140205-44140235 | 0 | 1 | 1 | 0 | 0 | - | - | - | - |
| 212071 | CGCCTGCGCCCGCGC | chr18:44774219-44774279 | 0 | 1 | 1 | 0 | 0 | - | - | - | - |
| 212232 | TCCTCCTCCTCTTCC | chr18:45566990-45567080 | 0 | 1 | 1 | 0 | 0 | - | - | - | - |
| 212627 | TCCTCGTGGGCTCCAGCTCGTG | chr18:47796091-47796151 | 0 | 1 | 1 | 0 | 0 | - | - | - | - |
| 212779 | GGCGGCGGCGGCAGGG | chr18:48723610-48723722 | 0 | 1 | 1 | 0 | 0 | - | - | - | - |
| 213272 | CGGCCACGGCCCCGGCCC | chr18:51750642-51750825 | 0 | 0 | 1 | 0 | 0 | - | - | - | - |
| 213816 | CGGCGGCGGCAGCGGCGGGGG | chr18:55103055-55103262 | 0 | 0 | 1 | 0 | 0 | - | - | - | - |
| 214738 | CCGCCGCCGCGACTGCCGCCCC | chr18:60190764-60190850 | 0 | 1 | 1 | 0 | 0 | - | - | - | - |
| 214739 | GAGGACGAGCGACGGC | chr18:60191308-60191368 | 0 | 1 | 1 | 0 | 0 | - | - | - | - |
| 215499 | ACCTACCAAATATGATCATAATGCAAATGAGAATAGCAATGATGACTTCT | chr18:64176175-64176275 | 1 | 1 | 1 | 0 | 0 | - | - | - | - |
| 216972 | CGCCCGCCGCCCGCGCCAGGGC | chr18:72124475-72124542 | 0 | 1 | 1 | 0 | 0 | - | - | - | - |
| 217451 | CAGGACCCTGCCGCCGTCGGCCTGCGAGGCCCCGTT | chr18:74154554-74154626 | 0 | 1 | 1 | 0 | 0 | - | - | - | - |
| 218582 | CGCCCCGCGCCGCGCGCCCGCCAGGC | chr18:76740175-76740284 | 0 | 1 | 1 | 0 | 0 | - | - | - | - |
| 218585 | GGCCCTCACTGCAGCGCCCGCCGCCGC | chr18:76752680-76752865 | 0 | 0 | 1 | 0 | 0 | - | - | - | - |
| 218680 | TGGGTCTGGATCACACTAACCACTGCAGTGGGTTTTATCTGGCAGTTTGGGTGTGAACTTGGACA | chr18:77036878-77037073 | 0 | 0 | 1 | 0 | 0 | - | - | - | - |
| 218697 | TGGAAGAGGAGGTATGTGAGTGACTCTCAGCCTGGTTCACAGTGTTTCTA | chr18:77090093-77090192 | 0 | 1 | 1 | 0 | 0 | - | - | - | - |
| 218703 | TGTGCACACAGGCGCCTCCCCCTCTGTCCCCACAGCCCATGCAGTCCAGCTCTGTGGAGTACACACACAGCACGTACACG | chr18:77097003-77097326 | 0 | 0 | 1 | 0 | 0 | - | - | - | - |
| 218711 | TCTCTCGAGGCAAGGCTGGACCCTGAGTGAGTACATGTCTG | chr18:77104345-77104472 | 0 | 1 | 1 | 0 | 0 | - | - | - | - |
| 219229 | TCCTGCAGGCCAGATGAC | chr18:77894642-77894696 | 0 | 1 | 1 | 0 | 0 | - | - | - | - |
| 219434 | GAGACCCTCCCACCTGTGCCCAGCGAAGCCCCTGGATGCCCC | chr19:422033-422163 | 0 | 1 | 1 | 0 | 0 | - | - | - | - |
| 219513 | GGGCGCGGG | chr19:460939-460975 | 0 | 1 | 1 | 0 | 0 | - | - | - | - |
| 219551 | ACCTCCCCGGAGCCTCCCGACACC | chr19:501682-501827 | 0 | 0 | 1 | 0 | 0 | - | - | - | - |
| 219580 | CCACCCAGAACATCAGGTAGGCCGGGCTCCCCCCCTGTAT | chr19:536324-536443 | 0 | 1 | 1 | 0 | 0 | - | - | - | - |
| 219600 | CTGGGGGTCCCGGACCCAGCCCTCAGGACTGGGTGAGGGGCCTAGA | chr19:580799-581315 | 0 | 0 | 1 | 0 | 0 | - | - | - | - |
| 219624 | AGGGAGGAATGCCCGGGGCTGGTCCCACAGGTGCCTGGGGGAAGGCACCAGCCTGAGGTGTGGGCACCCTCGTCCCCC | chr19:602913-603541 | 0 | 0 | 1 | 0 | 0 | - | - | - | - |
| 219639 | ACAAGCAGGTGCCCCTGTGCCCGCTGCAGGCCGGGGGCGGTGTCTGACCCAGCCTCGCCTCCTCCCCACAGT | chr19:610118-610259 | 0 | 0 | 1 | 0 | 0 | - | - | - | - |
| 219645 | GGATGGGGTGGCACACTGGCGCG | chr19:618852-618998 | 0 | 0 | 1 | 0 | 0 | - | - | - | - |
| 219652 | GCTCAGCCCCTGCGGCGGACACGCGACCCCG | chr19:623316-623470 | 0 | 0 | 1 | 0 | 0 | - | - | - | - |
| 219662 | CCCACTCACCAGGGGCCCAGGCTGGGGATGGGGACAGGCACCCCCA | chr19:649810-650270 | 0 | 0 | 1 | 1 | 30 | 30 | 0 | 10 | 11 |
| 219780 | GGGTGACTGGCCGTCCCCATCCTCCAGGGAGACTCAGGTGGCCCCTGAT | chr19:847673-847821 | 0 | 0 | 1 | 0 | 0 | - | - | - | - |
| 219809 | AGGGCTCCGAGGTGGGGC | chr19:872933-873458 | 0 | 0 | 1 | 0 | 0 | - | - | - | - |
| 219811 | CCACGGGGCCCCCACCTG | chr19:876817-876976 | 0 | 0 | 1 | 0 | 0 | - | - | - | - |
| 219815 | CCAGCCCCAGCCCCAGCCCCACGTGCCCCAGCAGCTCACCTTCCCCTGGTTGTCAATGCCCA | chr19:877647-879959 | 0 | 0 | 1 | 0 | 0 | - | - | - | - |
| 219852 | CCCCATCCATATCCTGGCCCAACATACTAGGTCCAACCCACTCCAGGTCCCGCCCACA | chr19:900548-900832 | 0 | 0 | 1 | 0 | 0 | - | - | - | - |
| 219860 | GGTGCGCTCCGGAGCAGGAGGGGAGGGGCGCACGTGGGGACGGGCGGG | chr19:918667-919013 | 0 | 0 | 1 | 0 | 0 | - | - | - | - |
| 219884 | GCCCGCGCCGCCCTG | chr19:1000592-1000637 | 0 | 1 | 1 | 0 | 0 | - | - | - | - |
| 219902 | GTGAGCCCCCCACCACTCCCTCCCC | chr19:1049436-1050048 | 0 | 0 | 1 | 0 | 0 | - | - | - | - |
| 219911 | TGGCCCCGCCCCATACTCATGCTGGCTCCACCCACACCA | chr19:1062788-1063565 | 0 | 0 | 1 | 0 | 0 | - | - | - | - |
| 219942 | TCTCGCGCCAGCTCC | chr19:1117325-1117355 | 0 | 1 | 1 | 0 | 0 | - | - | - | - |
| 219943 | GCCCCCTACTTTGCAGAGCACAGTCCCCTACCTT | chr19:1122404-1122469 | 0 | 1 | 1 | 0 | 0 | - | - | - | - |
| 219944 | CTCCTCCGCCTCCTC | chr19:1123575-1123620 | 0 | 1 | 1 | 0 | 0 | - | - | - | - |
| 220062 | CCGCTGCCATGCCGCCCG | chr19:1241824-1241949 | 0 | 1 | 1 | 0 | 0 | - | - | - | - |
| 220161 | CCCGGCAGCGGCCCGGCCCGCGG | chr19:1469448-1469583 | 0 | 1 | 1 | 0 | 0 | - | - | - | - |
| 220226 | CAGCCTCCCCTCCCCCCAAAACCCTCACAGACCT | chr19:1620866-1620968 | 0 | 1 | 1 | 0 | 0 | - | - | - | - |
| 220344 | CCCACTTCCCTCCACCCCTGCCCCTTCTCCTC | chr19:1790080-1790772 | 0 | 0 | 1 | 0 | 0 | - | - | - | - |
| 220363 | GGAGTCTGAGTC | chr19:1827119-1827154 | 0 | 1 | 1 | 0 | 0 | - | - | - | - |
| 220371 | GCGGCGCCGGAGGGC | chr19:1863125-1863229 | 0 | 1 | 1 | 0 | 0 | - | - | - | - |
| 220428 | GCCCCGGCTCCGCCTCCA | chr19:1992924-1993023 | 0 | 1 | 1 | 0 | 0 | - | - | - | - |
| 220483 | CGGGGG | chr19:2113345-2113383 | 0 | 1 | 1 | 0 | 0 | - | - | - | - |
| 220484 | TCTCTTTCTTCTTTGGGTTTCTT | chr19:2114158-2114201 | 0 | 1 | 1 | 0 | 0 | - | - | - | - |
| 220532 | CCCCGACCCGGACCCCGGCCTCCCGCCCCGCCG | chr19:2236025-2236192 | 0 | 0 | 1 | 0 | 0 | - | - | - | - |
| 220536 | CCAGCTCCTGGGGTCCACCCCCCAGCCCCTGGGTCCATCCCCCAGCCCCTGGGGTCCACCCA | chr19:2247996-2248505 | 0 | 0 | 1 | 0 | 0 | - | - | - | - |
| 220538 | GGCCTCTCCTCTTTCCGC | chr19:2252523-2252626 | 0 | 1 | 1 | 0 | 0 | - | - | - | - |
| 220542 | AGGGGAGCAGGGACCAGGTGAGGGGCAAGGACAGGCAGGGAGTGCTCACCC | chr19:2271937-2272086 | 0 | 0 | 1 | 0 | 0 | - | - | - | - |
| 220562 | GCTGCCCCCCTCACCCCACTACCCCCCTCGTCCC | chr19:2324025-2324126 | 0 | 1 | 1 | 0 | 0 | - | - | - | - |
| 220780 | GCACCGGAAATGCAAAGTCTGAGACCTCTCCGGGCTCTGCACACCTTCCGGCCCTGCACCATGT | chr19:2642843-2643665 | 0 | 0 | 1 | 0 | 0 | - | - | - | - |
| 220864 | GGAGGGCGTCCTGAACGGCAAGGTACGCGGGGACTGGGGACAG | chr19:2811710-2811920 | 0 | 0 | 1 | 0 | 0 | - | - | - | - |
| 220873 | CACACTGGAGAGAAGCCATATAAATGTAAGGAATGTGGGAAAGCCTTTAGTTATTCCTCAACTTTTCGAAGACACATGATAACA | chr19:2852810-2853818 | 0 | 0 | 1 | 1 | 40 | 7 | 13 | 20 | 20 |
| 220882 | TGTGGGAAAGCCTTCAGGTGTCACAAATCCTTTCGAGTCACATATGATCATGCACGCCGGAGGGAGACCGTATGAGTGCAAGCAC | chr19:2877661-2878327 | 0 | 0 | 1 | 0 | 0 | - | - | - | - |
| 220892 | TATAAATGTCAGCAATGTGGGAAAGCCTTCACTTATCCCCCAGACATTTCAAAGACACATGAGAAGACACACACGGGAGAGAAGCCC | chr19:2917372-2918297 | 0 | 0 | 1 | 0 | 0 | - | - | - | - |
| 220897 | GCTGAAGGCTTTCCCACAATGCTTACACTCATAGGGTTTCTCTCCAGTGTGCGTTCTCACATGATCTCGAAGGGAGGAGGGACA | chr19:2933702-2934686 | 0 | 0 | 1 | 0 | 0 | - | - | - | - |
| 220900 | AGGAGGCAGTGAGGGAATGACGCCACCCTTACCCA | chr19:2939001-2939281 | 0 | 0 | 1 | 0 | 0 | - | - | - | - |
| 220907 | CCTGGATGCCAA | chr19:2989690-2989729 | 0 | 1 | 1 | 0 | 0 | - | - | - | - |
| 221139 | CTCCCTACTCCCTGTCTCCCGTCAGCAACAAGAGGTGGGTCCCAGCTTCCTCCGCAGCC | chr19:3527026-3527144 | 0 | 1 | 1 | 0 | 0 | - | - | - | - |
| 221147 | TACAGGTGAGCCCCTCCC | chr19:3539253-3539289 | 1 | 1 | 1 | 0 | 0 | - | - | - | - |
| 221190 | CCCACATGCACAGCGGATGCCCCG | chr19:3643141-3643259 | 0 | 1 | 1 | 0 | 0 | - | - | - | - |
| 221196 | CCACCTGTGGGACTGCAGACCCGGGCGC | chr19:3648477-3648650 | 0 | 0 | 1 | 0 | 0 | - | - | - | - |
| 221319 | TCCCCCGGGGTCCGCCCTCCTGCAATGCCCGCTCCCCGTCCACTGT | chr19:3937318-3938601 | 0 | 0 | 1 | 0 | 0 | - | - | - | - |
| 221371 | GGAGGAGGAAGA | chr19:4037767-4037815 | 0 | 1 | 1 | 0 | 0 | - | - | - | - |
| 221411 | GGGAGAGCTGCGCAGGAGACACTGGGA | chr19:4100862-4101021 | 0 | 0 | 1 | 0 | 0 | - | - | - | - |
| 221482 | GAGGCCACGGGAGCC | chr19:4216894-4216999 | 0 | 1 | 1 | 0 | 0 | - | - | - | - |
| 221572 | GAGTCCCTGTCCCACAGTGAGGGGCTAAGGATGCAGCCCCAGCTGTCTTCACTCACAGACAGCTGGTGTTT | chr19:4429761-4429901 | 0 | 1 | 1 | 0 | 0 | - | - | - | - |
| 221585 | CCGCTGCCG | chr19:4472268-4472353 | 0 | 1 | 1 | 0 | 0 | - | - | - | - |
| 221597 | AGGAGAAGGCCGAGGAGAAGCTGGCCGGGG | chr19:4499614-4499701 | 0 | 1 | 1 | 0 | 0 | - | - | - | - |
| 221600 | GTCTTGGTGGTGTCCACGCCGGTCTGGACGGTCCCTTTGGCCACATTCACTGCACCGGTGACCCCACTGCAGACGGTGTCCTTGGTACCGGTTAGGACA | chr19:4510909-4513676 | 0 | 0 | 1 | 0 | 0 | - | - | - | - |
| 221737 | GCAGGTGGGAATCTCGCGGGTGTGGGGTTGAGCGTCGTGTGTGACGGGGGA | chr19:4954496-4954594 | 0 | 1 | 1 | 0 | 0 | - | - | - | - |
| 221807 | GGAGAGGGGCAGGTGGGGT | chr19:5131544-5131682 | 0 | 1 | 1 | 0 | 0 | - | - | - | - |
| 222004 | CGCTCCCGCTCCAGC | chr19:5594036-5594138 | 0 | 1 | 1 | 0 | 0 | - | - | - | - |
| 222022 | AGCGGCTGGAGCGGG | chr19:5661635-5661794 | 0 | 0 | 1 | 0 | 0 | - | - | - | - |
| 222214 | CCCCACCTTGTCGTAGGTGCCC | chr19:6213708-6213752 | 0 | 1 | 1 | 0 | 0 | - | - | - | - |
| 222215 | AGTCTGAGTCTGGAGCTGG | chr19:6217991-6218047 | 0 | 1 | 1 | 0 | 0 | - | - | - | - |
| 222217 | GGGGTG | chr19:6222400-6222430 | 0 | 1 | 1 | 0 | 0 | - | - | - | - |
| 222277 | GGCCCCAGGATTGAAG | chr19:6416326-6416375 | 0 | 1 | 1 | 0 | 0 | - | - | - | - |
| 222279 | CCGGGACCGCCGCCG | chr19:6424561-6424665 | 0 | 1 | 1 | 0 | 0 | - | - | - | - |
| 222449 | CTCACCTGGCCCCACCCCCAGCCCCCCACCTGCCCCACCCCCAGCCCCCCACCTGACTCCACCCCCAGCCCCCCACCTGGTCCCACCTCCAGCCC | chr19:6713630-6714008 | 0 | 0 | 1 | 0 | 0 | - | - | - | - |
| 222498 | GCTCCTAGATGGACAGGTGGGTGGAGTCAACACAGATCTGGGTGGAGCCTGGGCAGGGGTGGGGCCAG | chr19:6828895-6829589 | 0 | 0 | 1 | 0 | 0 | - | - | - | - |
| 222634 | ACCCTATGAATGCAGTGACTGTGGGAAAACCTTCAGCAGCAGATCTTACCTTACTGTTCATAAGAGAATCCACAATGGGGAGAA | chr19:7082995-7083583 | 0 | 0 | 1 | 1 | 40 | 29 | 0 | 20 | 20 |
| 222885 | CACCTGCGCACGCACACGGGCGAGCGGCCCCACACGTGCCCGCACTGCGCCAAGGCCTTCGGCCAGAGCTCAGCGCTGCTACAG | chr19:7584884-7585304 | 0 | 0 | 1 | 1 | 22 | 19 | 0 | 11 | 11 |
| 222887 | GCCGCTGCAGCAGCAGCAGCG | chr19:7585328-7585370 | 0 | 1 | 1 | 0 | 0 | - | - | - | - |
| 222888 | TGTGCCCAGCCCAGACCCTGATCC | chr19:7585645-7585743 | 0 | 1 | 1 | 0 | 0 | - | - | - | - |
| 222891 | CAGGTGCAGGTGGGCGGG | chr19:7591489-7591615 | 0 | 1 | 1 | 0 | 0 | - | - | - | - |
| 222986 | CTCACCCACTGCAGCCTTCAGCCGGGTCAGCTCCTGGTAGATCTCCTGCTGCTTAGATTTCTCTGGAAG | chr19:7810398-7810950 | 0 | 0 | 1 | 1 | 40 | 38 | 0 | 1 | 8 |
| 222998 | ATCTACCAGGAGCTGACCCAGCTGAAGGCTGCAGTGGGTGAGTTGCCAGAGAAATCCAAGCTGCAGGAG | chr19:7830573-7831123 | 0 | 0 | 1 | 0 | 0 | - | - | - | - |
| 223036 | GCAGGAGAGCAGGGCC | chr19:7915004-7915100 | 0 | 1 | 1 | 0 | 0 | - | - | - | - |
| 223039 | CGGCCCCGCCTCCTGACCTACCCCCCCCCGCGACCCCGCCTCCTGATC | chr19:7927559-7927860 | 0 | 0 | 1 | 0 | 0 | - | - | - | - |
| 223044 | TGAGGCAGGGGGAGAGGGTGGGACCTGCAGAGGAGGTGCGGCAAGAGAGGGTGGGGCCTGTGGAGGGGGCGTGGCCGAAGGAGACATTGGGGG | chr19:7935045-7936515 | 0 | 0 | 1 | 0 | 0 | - | - | - | - |
| 223053 | CCTGCAGAGGAATGTGGTCAAAGAAGAGGGAGAGG | chr19:7936496-7936671 | 0 | 0 | 1 | 0 | 0 | - | - | - | - |
| 223074 | CTGGGCAAGATGACAGTGGCGGTGAGTGACCAGGCGGGGCGTGCA | chr19:7975667-7975802 | 0 | 1 | 1 | 0 | 0 | - | - | - | - |
| 223160 | CCTGGCACAGG | chr19:8206687-8206719 | 0 | 1 | 1 | 0 | 0 | - | - | - | - |
| 223241 | TGTGGCATTCCCGACAGAGGGGACACTCTCCAGGGTCACAGGGGGCCCCATGGT | chr19:8367721-8367829 | 0 | 1 | 1 | 0 | 0 | - | - | - | - |
| 223246 | CCTCCCGGGTCTCGGGCACGGCCTCGGCACCCA | chr19:8399737-8399880 | 0 | 0 | 1 | 0 | 0 | - | - | - | - |
| 223302 | CGGCATGGAGCGCATGGGCTC | chr19:8550586-8551014 | 0 | 0 | 1 | 0 | 0 | - | - | - | - |
| 223309 | GCCTCGAGCGCATGG | chr19:8551035-8551134 | 0 | 1 | 1 | 0 | 0 | - | - | - | - |
| 223314 | CTTCTTGGGGAGGTCAGTGACCTCAGGCGGCGACGGCTTCTTGGGGAGGTCAGTGACCTCAGGCGGCGGGGG | chr19:8564301-8564586 | 0 | 0 | 1 | 0 | 0 | - | - | - | - |
| 223522 | AGGTGGGCGTGGCTGAAATCAGTGGGCGGGGCAGGGAA | chr19:9033381-9033609 | 0 | 0 | 1 | 0 | 0 | - | - | - | - |
| 223541 | ACTGGTGGCCATTGAAGGTGTGGTCTCTGGTTCACCAGGAGAAAAAGTCAGAATTGGAATAGTTGTACTAGATCACTGCCCTAGA | chr19:9048726-9050073 | 0 | 0 | 1 | 0 | 0 | - | - | - | - |
| 223544 | GTGGTCTTCAGAGCTGTGGTG | chr19:9050164-9050225 | 0 | 1 | 1 | 0 | 0 | - | - | - | - |
| 223673 | TTCCCACATTCCTTACATTCATAGGGTTTCTCTCCAGTGTGAGTTCTCACATGTTCGAAAGGATGAGGGACAACTAAAGGCT | chr19:9406132-9407556 | 0 | 0 | 1 | 0 | 0 | - | - | - | - |
| 223686 | AGCCAAAATCTACATCTTGTTTGCAAGAAAACT | chr19:9452595-9452661 | 0 | 1 | 1 | 0 | 0 | - | - | - | - |
| 223687 | TCACACTGGAGAAAAGCCTTATGAATGTAAGGAATGTGGGAAAGCCTTCACTAACTCATCACATCTTACTAAAACACAGGAGAAC | chr19:9453080-9453668 | 0 | 0 | 1 | 1 | 40 | 21 | 19 | 20 | 20 |
| 223705 | AAGGCTTTCCCACATTTCTTACATTCATAGGGCTTCTCTCCAGTGTGTCTTCGTAAATGTTTAGTAAGATATGAGCGCTCAGTG | chr19:9577712-9578384 | 0 | 0 | 1 | 1 | 40 | 0 | 10 | 20 | 20 |
| 223724 | ACATTCATAGGGTTTCTCTCCAGTGTGAGTCCTTTCATGAATTCTGAAAGGAACTGGAATCACGTGAAGGCCTTTCCCACACTCCTT | chr19:9639118-9640043 | 0 | 0 | 1 | 0 | 0 | - | - | - | - |
| 223732 | GGCTTTCCCACATTCCTTACATTCATAGGGTTTCTCTCCAGTGTGAATTCTTACATGTTCAAGTAAGGTGTGAAGAAGCAGTGAA | chr19:9676661-9677578 | 0 | 0 | 1 | 0 | 0 | - | - | - | - |
| 223800 | CATTCTTTACATTCATAGGGCTTTTCTCCAGTGTGAGTTCTTAAATGGGTGACTAAGGCACCGAGGAATTGAGTGAAAGGCTTTCCCA | chr19:9868388-9869396 | 0 | 0 | 1 | 1 | 40 | 0 | 0 | 20 | 20 |
| 223936 | GGCAGTCCTCACTCACCTCCC | chr19:10229726-10229768 | 1 | 1 | 1 | 0 | 0 | - | - | - | - |
| 223982 | GGGCCTCGCTGCCTCCTGAGT | chr19:10416524-10416566 | 0 | 1 | 1 | 0 | 0 | - | - | - | - |
| 224000 | CCTTGCTCACCTCCT | chr19:10476182-10476228 | 0 | 1 | 1 | 0 | 0 | - | - | - | - |
| 224059 | CCTCCTCTTCCT | chr19:10670988-10671047 | 0 | 1 | 1 | 0 | 0 | - | - | - | - |
| 224075 | GCCTCCGGTCAGGAGCC | chr19:10713230-10713280 | 0 | 1 | 1 | 0 | 0 | - | - | - | - |
| 224168 | GGCGGCAGGTGACCATGCCAGTGTCCCCACACAGCCACCACCCACTCCGCACCAGGCCACACTCACCACCATGGGAATGA | chr19:11034366-11034522 | 0 | 0 | 1 | 0 | 0 | - | - | - | - |
| 224187 | CCCGGCCCTGGC | chr19:11097196-11097243 | 0 | 1 | 1 | 0 | 0 | - | - | - | - |
| 224262 | TAGAAGCTATTGAATAAACATAGGATATACAATAGGCACCCAATAAACACTGATCGGATAAATACAGGGGTATATAGTAGATGTCCATCATA | chr19:11361285-11361556 | 0 | 0 | 1 | 0 | 0 | - | - | - | - |
| 224387 | TGTGGGAAAGCCTTCAGTTGTTCCAGTTCATTCGAATACATGAAAGAACTCACACTGGAGAGAAACCCTATGAATGTAAGCAA | chr19:11727915-11728830 | 0 | 0 | 1 | 0 | 0 | - | - | - | - |
| 224414 | ACATGAAAGAACTCACACTGGAGAGAAACCCTATGAATGTAAGAAATGTGGGAAAGCCTTTAGTTATTCCAGTTCCATTCGAAA | chr19:11796121-11797036 | 0 | 0 | 1 | 0 | 0 | - | - | - | - |
| 224423 | GCTTTACCACATTCCTTACATTCATACGGCTTCTCTCCAGTGTGAATTCTTTCATGTCCTAGAAGGAAACGGGAGACAAGAGAAG | chr19:11832576-11833918 | 0 | 0 | 1 | 0 | 0 | - | - | - | - |
| 224437 | AAGACACATGATAACGCACACTGGAGATGGACCTCATAAATGTAAGGTATGTGGGAAAGCCTTTGATTCTCCCAGTTTATTCG | chr19:11891526-11893035 | 0 | 0 | 1 | 0 | 0 | - | - | - | - |
| 224443 | CATGAAAGAACTCACACTGGAGAGAAACCCTATGAATGTAAGCAATGTGGGAAAGCCTTCATTGTTCCAGTTCTTTCGAAAA | chr19:11917212-11918052 | 0 | 0 | 1 | 0 | 0 | - | - | - | - |
| 224453 | TCACACTGGAGAGAAACCCTATGAATGTAAGCAATGTGGGAAAGCCTTCAGATCATGCCAGTCACACCTTCGAGTAGCATGAAAGGAC | chr19:11943073-11944284 | 0 | 0 | 1 | 0 | 0 | - | - | - | - |
| 224461 | AGGACTCACACTGGAGAGAAACCCTATGAATGTAAGAAATGTGGGAAAGCCTTCAGATCTGCCCCACAATCTTCGAATTCCATCGT | chr19:11979087-11980191 | 0 | 0 | 1 | 0 | 0 | - | - | - | - |
| 224482 | CATGAAAGAACTCACACTGGGGAGAAACCATATGAATGTAAACAATGTGATAAAGCATTTACATATTCTAGTTCCTTCATAGA | chr19:12059556-12060834 | 0 | 0 | 1 | 0 | 0 | - | - | - | - |
| 224489 | CTATCAATGCAAGCAATGTGGCAAAACCTTCATTCATTTTCCACTTCTTTTCAATATCATGAAAGGACTCACACTGGGAGAGAAACC | chr19:12061115-12061521 | 0 | 0 | 1 | 0 | 0 | - | - | - | - |
| 224492 | TCGAAGACATGAAAGAACTCACACTGGAGAAAAGCCTTATGAATGTAAGCAATGTGGGAAAGCATTCCATAGTTCCAGTTCCTT | chr19:12089467-12091010 | 0 | 0 | 1 | 0 | 0 | - | - | - | - |
| 224501 | GTGAGTCCTTCCATGCATTTGAAGGTGTGAGGCAGATCTAAAGGCTTTCCCACATTGCTTACATTCATAGGGTTTCTCTCCAGT | chr19:12125677-12127272 | 0 | 0 | 1 | 0 | 0 | - | - | - | - |
| 224509 | ATCTGAAGGCTTTACCACATTGCTTACACTCATAGGGTTTCTCTCCAGTGTGAGTCCTTTCATGATATTGAAAGGATTGAGGCAG | chr19:12154579-12155839 | 0 | 0 | 1 | 0 | 0 | - | - | - | - |
| 224524 | ATACATGAAAGAACTCACACTGGAGAGAAACCCTATGAATGTAAGCAATGTGGGAAAGCCTTCAGATTGTCCCAATTCCTTTCAA | chr19:12186574-12188580 | 0 | 0 | 1 | 0 | 0 | - | - | - | - |
| 224535 | AAGGCTTTCCCACATTGCTTACATTCATAGGGTTTCTCTCCAGTGTGAGTCCTTTCATGATATCGAATGGAACTGGAAAATG | chr19:12243456-12244545 | 0 | 0 | 1 | 0 | 0 | - | - | - | - |
| 224539 | AGGGTTTCTCTCCAGTGTGAGTCCTTTCATGGATTCGAACGCTGCGAGGCACATCCAAAGGCTTTACCACATTGCTTACATTCAT | chr19:12256155-12256827 | 0 | 0 | 1 | 1 | 40 | 20 | 20 | 20 | 20 |
| 224556 | TTTCGAATACATGAAAGAACTCACACTGGAGAGAAACCTTATGAATGTAAGCAATGTGGGAAAGCCTTCAGTTTTCCCAACC | chr19:12297823-12298992 | 0 | 0 | 1 | 0 | 0 | - | - | - | - |
| 224582 | ACACTGCTTACATTCATAGGGTTTCTCTCCAGTGTGAATTCTTTCATGTCTTAGATAGGAACTGTAAACAGGGAAGGCTTTAGA | chr19:12384127-12384632 | 0 | 0 | 1 | 0 | 0 | - | - | - | - |
| 224600 | TGCATTATCATGTGTCTTCGAAAGCTTGAGCTATGAGATAACGCTTTCCCACACTGCTTGCATTCATAGGGTTTCTCTCCAGTG | chr19:12429510-12430433 | 0 | 0 | 1 | 0 | 0 | - | - | - | - |
| 224607 | GCTTTCCCACATTCTTACATTCATAGGGTTTCTCTCCAGTGTGAGTTCTTTCATGTCTTCGAAAGGAACTAGAAATATGAAAG | chr19:12460911-12462003 | 0 | 0 | 1 | 0 | 0 | - | - | - | - |
| 224630 | GCTTTCCCACATTCCTTACATTCATACGGGTTCTCTCCAGTATGAATTCTTTCATGTCCTAGAAAGAAAACGAGCCAATGAGTGAAG | chr19:12501424-12502598 | 0 | 0 | 1 | 0 | 0 | - | - | - | - |
| 224645 | GCTTTCCCACATTCCTTACACTCATAAGGCTTCTCTCCAGTGTGAATCCTTTCATGTACCAGAAAGGTATCATGAAACGACCGAAG | chr19:12541282-12542455 | 0 | 0 | 1 | 0 | 0 | - | - | - | - |
| 224654 | AAAGGAACTGGGACAACTGAAGGCTTTACCACATTGTTTACATTCATAGGGTTTCTCTCCAGTGTGAGTTCTTTCATGTATTCG | chr19:12574758-12576354 | 0 | 0 | 1 | 1 | 40 | 20 | 19 | 20 | 20 |
| 224670 | ATAAATGAAAGCTTTCCCACATTCTTTACATTCATAGGGTTTTTCTCCAGTATGAGTTCTTTCATGTATTCTGAAAGGAACTGGA | chr19:12637293-12638552 | 0 | 0 | 1 | 0 | 0 | - | - | - | - |
| 224708 | CCTTTCAAAGACATGAAAGGACTCACACTGGAGAGAAACCCTATAAATGTAAACAATGTGGAAAAGCCTTCAGTTATCCCAGT | chr19:12738779-12740210 | 0 | 0 | 1 | 0 | 0 | - | - | - | - |
| 224775 | GAGGACAAGGAGGATGAT | chr19:13054619-13054699 | 0 | 1 | 1 | 0 | 0 | - | - | - | - |
| 225147 | GGAGCCGGTGCCAGCGCC | chr19:13988181-13988274 | 0 | 1 | 1 | 0 | 0 | - | - | - | - |
| 225154 | GCCCCCAGTAGGCCCCGCCCCCGTAGGCCCC | chr19:14030007-14030100 | 0 | 1 | 1 | 0 | 0 | - | - | - | - |
| 225177 | GCCACCGCCACCCCC | chr19:14083665-14083725 | 0 | 1 | 1 | 0 | 0 | - | - | - | - |
| 225212 | TTCTCTGCCTCCAGTGATCTCCTCACCTCCCCTT | chr19:14164849-14165069 | 0 | 0 | 1 | 0 | 0 | - | - | - | - |
| 225225 | CATCATCATCTT | chr19:14200098-14200146 | 0 | 1 | 1 | 0 | 0 | - | - | - | - |
| 225226 | CGGCGGCGGCTGCTGGCTGCGG | chr19:14200845-14200954 | 0 | 1 | 1 | 0 | 0 | - | - | - | - |
| 225556 | AGCCCAGCCCTCCAG | chr19:15219873-15219916 | 0 | 1 | 1 | 0 | 0 | - | - | - | - |
| 225557 | CCCCAAGGTAAGAACAAGCTTCCACATCCCCTT | chr19:15220201-15220469 | 0 | 0 | 1 | 0 | 0 | - | - | - | - |
| 225592 | GCTGCTGCTGCTGCTGCTCCTGGC | chr19:15349681-15349797 | 0 | 1 | 1 | 0 | 0 | - | - | - | - |
| 225593 | GCGGCGGGGGGGGCTGCTGGCCCTGGGG | chr19:15353785-15353978 | 0 | 0 | 1 | 0 | 0 | - | - | - | - |
| 225594 | GGAGGCGGTGGGCGGCTGCTGG | chr19:15355319-15355385 | 0 | 1 | 1 | 0 | 0 | - | - | - | - |
| 225595 | TTTCCTTCTTGTGCTTTCTCCTTTTTCT | chr19:15366963-15367016 | 0 | 1 | 1 | 0 | 0 | - | - | - | - |
| 225623 | GCCATA | chr19:15514491-15514521 | 0 | 1 | 1 | 0 | 0 | - | - | - | - |
| 225712 | CTCCAGGTAGACACTGCACTGGCCA | chr19:15756667-15756717 | 1 | 1 | 1 | 0 | 0 | - | - | - | - |
| 225778 | CCACCAGCCCAGGAGCAGC | chr19:15918392-15918448 | 0 | 1 | 1 | 0 | 0 | - | - | - | - |
| 226060 | GCTGGCTGTTCCAGGGGCGTCGA | chr19:16636295-16636440 | 0 | 0 | 1 | 0 | 0 | - | - | - | - |
| 226304 | CCCGCCCCCTGCGAGGC | chr19:17438920-17438971 | 0 | 1 | 1 | 0 | 0 | - | - | - | - |
| 226305 | CCTCCTCCTCGTCCTCCT | chr19:17439392-17439533 | 0 | 0 | 1 | 0 | 0 | - | - | - | - |
| 226350 | GGAGGAGGTGGGTGCAGGGCTAG | chr19:17535479-17535548 | 0 | 1 | 1 | 0 | 0 | - | - | - | - |
| 226369 | CTCGGCGCGCAGCCCGCCTGCAG | chr19:17559130-17559218 | 0 | 1 | 1 | 0 | 0 | - | - | - | - |
| 226469 | CTCCTCCTCCTCCTCAGCCAG | chr19:17766924-17767027 | 0 | 1 | 1 | 0 | 0 | - | - | - | - |
| 226505 | CACCCACAGTGACCA | chr19:17838198-17838242 | 0 | 1 | 1 | 0 | 0 | - | - | - | - |
| 226627 | CTCTTCCTCCTCATC | chr19:18321843-18321888 | 0 | 1 | 1 | 0 | 0 | - | - | - | - |
| 226721 | TCCTCCTCTTCC | chr19:18652646-18652706 | 0 | 1 | 1 | 0 | 0 | - | - | - | - |
| 226860 | CCGCGCTGCCGCCAG | chr19:19006776-19006881 | 0 | 1 | 1 | 0 | 0 | - | - | - | - |
| 226968 | GGCGGCAGCGGCCCA | chr19:19431682-19431740 | 0 | 1 | 1 | 0 | 0 | - | - | - | - |
| 227072 | TTTCTCTCCAGTGTGAGTCCTTTCATGCATTCGAAAGTGACTGGAAAAATGAAGGCTTTTCCACATTGTTTACATTCATAGGG | chr19:19822166-19823672 | 0 | 0 | 1 | 0 | 0 | - | - | - | - |
| 227113 | AGGCTTTGCCACATTCTTCACATTTGTAGGGTTTCTCTCCAGTATGAATTATCTTATGTTTAGTAAGGGTTGAGAATGCAGTAA | chr19:19905149-19906236 | 0 | 0 | 1 | 0 | 0 | - | - | - | - |
| 227127 | ATGTGGCAAAGCCTTTAACCAGTCCTCAAACCTTACTACACATAAGAAAATTCATACTGGAGAGAAACCCTACAAATGTGAAGA | chr19:20002583-20003753 | 0 | 0 | 1 | 0 | 0 | - | - | - | - |
| 227133 | AGAATGTGGCAAAGCCTTTAACCATCCTCAACCCTTACTAAACATAAGAAAATTCATACTGGAGAGAAACCCTACAAATGTGA | chr19:20044291-20045720 | 0 | 0 | 1 | 0 | 0 | - | - | - | - |
| 227146 | TTTGCCACATTCTTCACATTTGTAGGGTTTCTCTCCAGTATGAATTCTCTTATGTTTAGTAAGATGTGAGCACCGTTAAAAGC | chr19:20116766-20117854 | 0 | 0 | 1 | 0 | 0 | - | - | - | - |
| 227177 | ACATAAGATAATTCATACTGGAGAGAAACCCTACAAATGTGAAGAATGTGGCAAAGCCTTCAAGCAGTCCTCAACCCTTACTAC | chr19:20228848-20230438 | 0 | 0 | 1 | 0 | 0 | - | - | - | - |
| 227207 | CAAAGCCTTTAACCGTCCTCAACCCTTACTACACATAAGAAAATTCATACTGGAGAGAAACCCTACAAATGTGAAGAATGTGG | chr19:20308082-20308921 | 0 | 0 | 1 | 0 | 0 | - | - | - | - |
| 227306 | AGGGTTTCTCTCCAGTATGAATTATCTTATGTGTAGTAAGGTGTGAGGAGCAGTTAAAGGCTTTGCCACATTCTTCACATTTGT | chr19:20727150-20728574 | 0 | 0 | 1 | 0 | 0 | - | - | - | - |
| 227402 | CTACAAATGTGAAGAATGTGGAAAAGCTTTTAACCAGTCCTCAAACCTTACTAAACATAAGATAATTCATACTGGAGAGAAACC | chr19:21131922-21133490 | 0 | 0 | 1 | 0 | 0 | - | - | - | - |
| 227441 | ACATAAGAGAATTCATACTGGAGAGAAACCTTACAAATGTGAAGAATGTGGCAAAGCTTTTAACCGATCCTCAACCCTTACTAC | chr19:21299952-21300960 | 0 | 0 | 0 | 1 | 40 | 19 | 0 | 20 | 20 |
| 227469 | GTTTCTCTCCAGTATGAATTATCTTATGTTTAGTAAGGATTGAGGACCAGTTAAAAGCTTTGCCACATTCTTCACATTTGTAGG | chr19:21475839-21477351 | 0 | 0 | 1 | 0 | 0 | - | - | - | - |
| 227500 | TGTGTGTTTGTGTG | chr19:21587890-21587932 | 0 | 1 | 1 | 0 | 0 | - | - | - | - |
| 227503 | ATGTGAAGAATGTGGCAAAGCTTTTAACCAATTCTCAACCCTTACTAAACATAAGATAATTCATACTGGAGAGAAACCCTACAA | chr19:21606093-21609234 | 0 | 0 | 1 | 0 | 0 | - | - | - | - |
| 227582 | TTAAAAGCTTTGCCACATTCTTCACATTTGTAGGGTTTCTCTCCAGTATGAATTATCTTATGTGTAGTAAGGTGTGAGGACCGG | chr19:21909379-21910552 | 0 | 0 | 1 | 0 | 0 | - | - | - | - |
| 227606 | TTTGTAGGGTTTCTCTCCAGTATGAATTTTCTTATGTGTAGTAAGGTTTGAGGACTGGTTAAAAGCTTTGCCACATTCTTCACA | chr19:21990465-21992397 | 0 | 0 | 0 | 1 | 40 | 22 | 0 | 20 | 20 |
| 227647 | GCTTTGCCACATTCTTCACATTTGTAGGGTTTCTCTCCAGTATGAATTTCCTTATGTTTAGTAAGGATTGAGGACCAGTTAAA | chr19:22153045-22157278 | 0 | 0 | 1 | 0 | 0 | - | - | - | - |
| 227666 | ACTCAACATAAGAGAATTCATACTGGAGAGAAACCCTACAAATGTGAAGAATGTGGCAAAGCCTTTAACCGGTCCTCACCCTT | chr19:22271116-22272795 | 0 | 0 | 1 | 0 | 0 | - | - | - | - |
| 227706 | TAAGGATTGAGGACTGGTTAAAGGCTTTGCCACATTCTTCACATTTGTAGGGTTTCTCTCCAGTATGAATTCTCTTATGTTAG | chr19:22362117-22364132 | 0 | 0 | 1 | 0 | 0 | - | - | - | - |
| 227731 | CTACAAATGTGAAGAATGTGGCAAAGCTTTTAAATGTTCTCAACCCTTACTAAACATAAGATAATTCATACTGGAGAGAAACC | chr19:22496839-22500273 | 0 | 0 | 1 | 0 | 0 | - | - | - | - |
| 227754 | TTTGTAGGGTTTCTCTCCAGTATGAATTCTCTTATGTGTAGTAAGGTTTGAGGACTGGTTAAAAGCTTTGCCACATTCTTCACA | chr19:22574395-22575571 | 0 | 0 | 0 | 1 | 40 | 25 | 0 | 0 | 0 |
| 227835 | CATTCTTCACATTTGTAGGGTTTCTCTCCAGTATGAATTATCTTATGTTTAGTAAGGTCTGAGAATTGTTAAAAGCTTTGCCA | chr19:22937911-22942261 | 0 | 0 | 1 | 0 | 0 | - | - | - | - |
| 227884 | GTTTCTCTCCAGTATGAATTACCTTATGTTTAGTAAGGCTTGAGGACTGACTAAAGGCTTTGCCACATTCTTCACATTTGTAGG | chr19:23157946-23159707 | 0 | 0 | 1 | 0 | 0 | - | - | - | - |
| 228009 | TTTGTAGGGTTCTCTCCAGTATGAATTTTCTTATGTCTAGTAAAGGCTGAAGACCAGTAAAAAGGATTTGCCACATTCTTCACA | chr19:23541829-23545313 | 0 | 0 | 1 | 0 | 0 | - | - | - | - |
| 228122 | GTTTCTCTCCAGTATGAATTTTCTTATGTTTAGTAAGGTTTGAGGATTGGTTAAAAGCTTTGCCACATTCTTCACATTTGTAGG | chr19:23836047-23837306 | 0 | 0 | 1 | 0 | 0 | - | - | - | - |
| 228156 | TTTGTAGGGTTTCTCTCCAGTATGAATTATCTTATGTGTAGTAAGGTGTGAGGACTGGTTAAAGGCTTTGCCACATTCTTCACA | chr19:23926494-23927922 | 0 | 0 | 0 | 1 | 40 | 20 | 0 | 20 | 20 |
| 228231 | CCTACAAATGTGAAGAATGTGGCAAAGCATTTAATTGATCCTCAACCCTTACTAACATAAGATAATTCATACTGGAGAGAAAC | chr19:24115516-24117350 | 0 | 0 | 1 | 0 | 0 | - | - | - | - |
| 228287 | CCTACAAATGTGAAGAATGTGGCAAAGCTTTTAATCGGTCCTCAACCCTTACTACACATAAGATAATTCATACTGGAGAGAAAC | chr19:24309427-24311172 | 0 | 0 | 1 | 0 | 0 | - | - | - | - |
| 230233 | AGCACAAGGCGCAAGAAAG | chr19:33616067-33616103 | 0 | 1 | 1 | 0 | 0 | - | - | - | - |
| 230251 | AGCCGGAGCCCGAGCCCG | chr19:33685563-33685745 | 0 | 0 | 1 | 0 | 0 | - | - | - | - |
| 230300 | GGTGCGGGGCGGCG | chr19:33792704-33792793 | 0 | 1 | 1 | 0 | 0 | - | - | - | - |
| 230680 | GGAGAGAAACCATATGAATGTATGAATGTGGGAAGACCTTTAGCCATGGCTCATCACTTACTAACGACATCAGAGAAGCTCACACT | chr19:35232066-35232654 | 0 | 0 | 1 | 1 | 40 | 14 | 0 | 0 | 0 |
| 230683 | GTAAAAGCCTTTCCACATTCTCTGCACTCATAGGGCTTCTCTCCAGTGTGAATCCTCATATGTCGAATGAAAGAAGAGCTGATGA | chr19:35250155-35251080 | 0 | 0 | 1 | 0 | 0 | - | - | - | - |
| 230719 | TCATACCTTGTTCAGCATCAGAGAATTCATACTGGGGAGAAACCCTATGAATGTAAGGAATGTGGCAAGGCCTTTAGTACTGGC | chr19:35434686-35435859 | 0 | 0 | 1 | 0 | 0 | - | - | - | - |
| 230728 | TTTCCCACATTCACTGCACTCATAAGGCCGCTCACCAGTGTGAAGTCTCCGATGGCTATTGAGGCTGGAGCTCTGGCTAAAGAA | chr19:35449135-35449972 | 0 | 0 | 1 | 0 | 0 | - | - | - | - |
| 230735 | GCCCAGCGCAGCCCA | chr19:35491296-35491383 | 0 | 1 | 1 | 0 | 0 | - | - | - | - |
| 230825 | CTCAGAGATGCAGAGAC | chr19:35837048-35837082 | 0 | 1 | 1 | 0 | 0 | - | - | - | - |
| 230868 | CTGCTGCCACTG | chr19:36002340-36002490 | 0 | 0 | 1 | 0 | 0 | - | - | - | - |
| 230875 | TCCTTCCCAGCCTGGTCAGCAGCATGGTGGACACCTTGGCCAAGCTTCTCCACT | chr19:36017606-36017984 | 0 | 0 | 1 | 1 | 12 | 12 | 0 | 6 | 6 |
| 230877 | CATGGTGGACCCCCTGGCCAAACTTCTCTGCCTCCTTCCAGGCCTCACTGACAG | chr19:36018006-36018926 | 0 | 0 | 1 | 0 | 0 | - | - | - | - |
| 230935 | CCTCCCCCAGCCCCTCCA | chr19:36212109-36212201 | 0 | 1 | 1 | 0 | 0 | - | - | - | - |
| 230950 | GTCCTCTCCTCCTCCTCGA | chr19:36277405-36277462 | 0 | 1 | 1 | 0 | 0 | - | - | - | - |
| 230953 | CCAGCAGGAGGGGTTACCTGTGCCACCCGATGCAGGCGGCTGAGGGAGGCCCGGAGGTGCTGGTT | chr19:36297795-36297990 | 0 | 0 | 1 | 0 | 0 | - | - | - | - |
| 231046 | GAATAAAGGCCTTCCCACACTCCTTACATTCATAGGGTTTGTCACCAGGATGAATTCTCTGATGTTGAGTAAGTTGTGAACTAC | chr19:36673411-36674421 | 0 | 0 | 1 | 0 | 0 | - | - | - | - |
| 231073 | TATGAATCTCTGATGTTGAGTAAGTTGTGAGAGCAGTCTAAAGGCCTTTCCACATTCCTTACATTCATAGGGTTTCTCACCAG | chr19:36831136-36832228 | 0 | 0 | 1 | 1 | 40 | 4 | 0 | 20 | 20 |
| 231082 | CTAAAGGCCTTCCCACATTCCTTACATTCATAGGGTTTCTCACCAGTATGAATTCTCTGATGTAGAGTAAGTTGTTGACGCACT | chr19:36883694-36884787 | 0 | 0 | 1 | 0 | 0 | - | - | - | - |
| 231094 | CCACATTCCTTACATTCATAGGGTTTCTCACCAGTATGAATTCTCTGATGTCTAGTAAGGTCTGAGCACTGACTAAAGGCCTTC | chr19:36939933-36940689 | 0 | 0 | 1 | 1 | 40 | 34 | 0 | 20 | 20 |
| 231109 | GCTTTCCCACATTCATTACACTCATAAGGTTTCTCACCTGTATGGATTCTCATATGCACAGTAAGAGATGAGATTTGAGAGAAG | chr19:37004953-37006283 | 0 | 0 | 1 | 0 | 0 | - | - | - | - |
| 231117 | TTCCCACATCCTTACATTCATAGGGTTTTTCACCAGTATGAATTCTCTGATGTTCGGTAAGGGATGAACTATGTCTAAAGGCC | chr19:37037837-37039013 | 0 | 0 | 1 | 0 | 0 | - | - | - | - |
| 231130 | GAGAAACCGTATCAATGTAATCAGTGTGGGAAGTGCATTTAGCAAGAAGACATACCCTCACTGATCACCAGAGAACTCACACAGGA | chr19:37117927-37118431 | 0 | 0 | 1 | 1 | 38 | 12 | 0 | 19 | 19 |
| 231134 | CCAGTATGAATTCTCTGATGTTGAGTAAGCTGTGAATGAAGTCTAAAGGCCTTCCCACATTCCTTACATTCATAGGGTTTCTCA | chr19:37129684-37130683 | 0 | 0 | 1 | 0 | 0 | - | - | - | - |
| 231148 | CATCAGAGAACTCATACGGGAGAGAAACCCTATGATTGTAATGAATGTGGGAAGTCCTTCCGCCAGAAGACAACACTCTCTCTA | chr19:37210520-37211611 | 0 | 0 | 1 | 0 | 0 | - | - | - | - |
| 231155 | TTCCCACATTCCTTACAATCATAGGGTTTCTCACCAGTGTGAATTCGCTGATGTTGAATTAGTGCTGAGCCAGAAGTAAAAGAT | chr19:37238894-37241495 | 0 | 0 | 1 | 0 | 0 | - | - | - | - |
| 231167 | CATAAGGTTTCTCACCAGTATGAATTCTCTGATGTCGAGTAAGATGTGAACCACAATAAAGGCCTTCCCACATTCCTTACATT | chr19:37309558-37310827 | 0 | 0 | 1 | 0 | 0 | - | - | - | - |
| 231181 | CATCAGAGAATTCATACTGGTGAGAAACCTTATGAATGTAAGGAATGTGGGAAGGCCTTTAGTAGTGGTTCAAACCTTACTCGA | chr19:37367885-37369316 | 0 | 0 | 1 | 0 | 0 | - | - | - | - |
| 231184 | GCCTTCCCACATTCCTTACATTCATAGGGTTTCTCACCAGTATGAATTCTCTGATGTCGAGTAAGTTTGAGCCTTTATTAAAG | chr19:37382445-37383286 | 0 | 0 | 1 | 0 | 0 | - | - | - | - |
| 231193 | AATTCATACTGGAGAGAAACCTTATGAATGTAAGGAATGTGGAAAAGCCTTCAGTCAGAAGTAAAATCTTATTGACACATCAGAA | chr19:37440780-37441957 | 0 | 0 | 1 | 0 | 0 | - | - | - | - |
| 231200 | GAGAAACCCTATAAATGTAAGGAATGTGGGAAAGCCTTTCCATCCACTCACAACTTAATCGACATCAGAGGATCCATACTGGT | chr19:37487682-37488606 | 0 | 0 | 1 | 1 | 40 | 10 | 0 | 20 | 20 |
| 231233 | TGAGAAACCCTATGAATGTAAGGAATGTGGGAAGGCCTTTACTCGTGGCTCACAACTTACTCAACATCAGAGAATTCATACTGG | chr19:37618297-37619969 | 0 | 0 | 1 | 0 | 0 | - | - | - | - |
| 231235 | TTCCCACAGTCACTGCATTCATAAGGTTTCTCTCCAGTATGAATTCTCTGATGAATAATGAAGTCTGACTTCTGAGTGAAGGCT | chr19:37642962-37644054 | 0 | 0 | 1 | 1 | 40 | 21 | 5 | 0 | 0 |
| 231242 | CTTCCCACACTCAGTGCATTCATAAGGTTTCTCTCCAGTATGAATTTTCTGATGAACAATAAAGTATTGACTTGCTGGATGAAAGCT | chr19:37676599-37677188 | 0 | 0 | 1 | 0 | 0 | - | - | - | - |
| 231258 | TATGAATGTAAGGAATGTGGGAAAGCCTTTAGTAGTAGCTCACAATCTTACTCAACATCAGAGAATTCATACTGGTGAAAAACCC | chr19:37733645-37734569 | 0 | 0 | 1 | 1 | 40 | 17 | 0 | 20 | 20 |
| 231282 | AGGACACACTCAGGGGAGAAGCCTTATGTGTGCAGGGAGTGTGGGCGAGGCTTTACGTGGAAGTCAAACCTCATCACACACCAG | chr19:37853573-37854743 | 0 | 0 | 1 | 0 | 0 | - | - | - | - |
| 231286 | TTAATCAACATCAGAGAATTCACACTGGAGAGAAACCCTATGAATGTAATGAATGTGGAAAAGCCTTCAGCAGATGCTCACC | chr19:37879816-37880821 | 0 | 0 | 1 | 0 | 0 | - | - | - | - |
| 231290 | TACAGTCATAGGGTTTCTCACCTGTATGACTTCTCATATGAAGAGTAAGGGATGAGATTTGAGAGAAGGCTTTACCACATTTAT | chr19:37903566-37904994 | 0 | 0 | 1 | 1 | 40 | 28 | 1 | 20 | 20 |
| 231312 | AAAGCCTTCAGCCAGAATGCATACCTTGCTCAACATCAGAGAATTCATACTGGAGAGAAACCCTATGAATGTAAGAATGTGGG | chr19:37975196-37976119 | 0 | 0 | 1 | 0 | 0 | - | - | - | - |
| 231318 | AACATCGAGAACACACACAGGAGAGAGACCCTATCGTCTGCAGAGAATGCGGAAAATCCTTCAGCCAGAAGTCATACCTCAATA | chr19:38028458-38028710 | 0 | 0 | 1 | 0 | 0 | - | - | - | - |
| 231329 | ATAGGGTTTCTCACCTGTATGAATTCTCTGATGTTCAGTAAGTTGTGAGCCACGAATAAAGGCCTTCCCACATTCCTTACATTC | chr19:38055571-38056912 | 0 | 0 | 1 | 0 | 0 | - | - | - | - |
| 231336 | AGAATTCATACTGGTGAGAAGCCCTACAAATGTAAGGAATGTGGGAAGACCTTTAGAGTTCGTTCTCCTTACTGAACATCAG | chr19:38103471-38104143 | 0 | 0 | 1 | 1 | 40 | 6 | 0 | 20 | 20 |
| 231342 | GTCTAAATGCCTTTCCACATTCCTTACACTTATAGGGTTTCTCACCAGAATGAATACTCTGATGTTGAATAAGTTGTGAAAGCA | chr19:38125928-38127020 | 0 | 0 | 1 | 0 | 0 | - | - | - | - |
| 231355 | AAAAGCCTTCCCACATTCCTTACATTCATAAGGTTTCTCACCAGTGTGAATTCTCTGATGTTGAATAAGAGCTGAACAATTGTT | chr19:38160168-38161088 | 0 | 0 | 1 | 0 | 0 | - | - | - | - |
| 231376 | TTCCCACATTCCTTACATTCATAAGGTTTCTCACCAGTATGAATTTTCTGATGTTGAGTAAGGTTTGAAGCAGACTAAAGGTC | chr19:38229456-38231052 | 0 | 0 | 1 | 1 | 40 | 17 | 0 | 20 | 20 |
| 231423 | TCACTCAAACTTTCTGTCTCTTCC | chr19:38377225-38377483 | 0 | 0 | 1 | 0 | 0 | - | - | - | - |
| 231426 | CTGAGCCAGATTCTTCTTTTC | chr19:38378628-38378773 | 0 | 0 | 1 | 0 | 0 | - | - | - | - |
| 231427 | CCTCTTCCTCAACCAGTTTCC | chr19:38378933-38379058 | 0 | 1 | 1 | 0 | 0 | - | - | - | - |
| 231428 | GCCAATTTCTCCCATTTCTGG | chr19:38379175-38379322 | 0 | 0 | 1 | 0 | 0 | - | - | - | - |
| 231429 | TCTCTCTTCTTGTGCTAAGTT | chr19:38379372-38379518 | 0 | 0 | 1 | 0 | 0 | - | - | - | - |
| 231467 | GCCACC | chr19:38572367-38572415 | 0 | 1 | 1 | 0 | 0 | - | - | - | - |
| 231540 | AAGAAGAAGGAGAAGGGC | chr19:38795547-38795596 | 0 | 1 | 1 | 0 | 0 | - | - | - | - |
| 231624 | GAGGGCGCGGAAGCGCGGCGGAG | chr19:39055760-39055866 | 0 | 1 | 1 | 0 | 0 | - | - | - | - |
| 231625 | GAGGGCGCTGGAGACGACGAG | chr19:39056201-39056285 | 0 | 1 | 1 | 0 | 0 | - | - | - | - |
| 231749 | TCCTCGCGCCTCTC | chr19:39401281-39401308 | 0 | 1 | 1 | 0 | 0 | - | - | - | - |
| 231750 | CTCCTCCTTCGTC | chr19:39401487-39401523 | 0 | 1 | 1 | 0 | 0 | - | - | - | - |
| 231937 | GAGGAGGAAGAG | chr19:39944046-39944107 | 0 | 1 | 1 | 0 | 0 | - | - | - | - |
| 231938 | TGGCTCCCGAGACACCCATGTACGGCTC | chr19:39963896-39963950 | 0 | 1 | 1 | 0 | 0 | - | - | - | - |
| 231943 | CCGGACCCCGACTCCAGT | chr19:40005926-40006229 | 0 | 0 | 1 | 0 | 0 | - | - | - | - |
| 231950 | GCCGCCGCCACCGGGCCTCCCCTG | chr19:40030474-40030646 | 0 | 0 | 1 | 0 | 0 | - | - | - | - |
| 231983 | CCGCCAAAGCCCCCTCGG | chr19:40331342-40331417 | 0 | 1 | 1 | 0 | 0 | - | - | - | - |
| 232025 | TATGAATGTAAGGAATGTGGGAAGGCCTTTAGTCGTAGTTATCAACTTACTCAACATCACAGAATTCATACTGGTGAGAAACCC | chr19:40519825-40521674 | 0 | 0 | 1 | 0 | 0 | - | - | - | - |
| 232030 | CACATTCTTTACATTCATAGGGTTCTCACCAGTATGAATTCTTAGATGTGCAGAAAGACTCAAGCTAAATCTAAAGGTCTTTC | chr19:40539654-40542343 | 0 | 0 | 1 | 0 | 0 | - | - | - | - |
| 232040 | TTCCCACATTCCTTACATTCAAAGGGTTTCTCACCAGTATGAATATTCTGATGTTGAATAAGGTTTGAGCCACGATTAAAGGCC | chr19:40579985-40581919 | 0 | 0 | 1 | 0 | 0 | - | - | - | - |
| 232093 | GTGGCAGCAGCA | chr19:40718729-40718774 | 0 | 1 | 1 | 0 | 0 | - | - | - | - |
| 232129 | CACCTTGGGCAGCTGCACCTCTGGGAGGTGCACATCGGGCACAGCCATTTCAGG | chr19:40902008-40902863 | 0 | 0 | 1 | 0 | 0 | - | - | - | - |
| 232142 | AGCTTGACCTCAGGACCCTTGGGC | chr19:40902903-40902972 | 0 | 1 | 1 | 0 | 0 | - | - | - | - |
| 232176 | GCGGGCGCA | chr19:41018721-41018758 | 0 | 1 | 1 | 0 | 0 | - | - | - | - |
| 232193 | CCGGAGCGGCAGGAGTCAGCTCGATCAAGCCGAGGAGGCTGCCCAGGAGGCGGCGG | chr19:41073922-41074142 | 0 | 0 | 1 | 0 | 0 | - | - | - | - |
| 232203 | GCGGCGGCGCGGGCGGAA | chr19:41111417-41111501 | 0 | 1 | 1 | 0 | 0 | - | - | - | - |
| 232205 | CCCCGGCCCGAA | chr19:41114415-41114451 | 0 | 1 | 1 | 0 | 0 | - | - | - | - |
| 232426 | ACAGCCACCACCACAGCAGCCACCGCCACC | chr19:41809985-41810162 | 0 | 0 | 1 | 0 | 0 | - | - | - | - |
| 232647 | CCTCCCTCAGACCCAGGGGTCCAGGCCCCCAGCCCCTCCTCCCTCAGACCCAGAAGTCCAGGCCCCCAGACCCT | chr19:42480000-42480584 | 0 | 0 | 1 | 0 | 0 | - | - | - | - |
| 232660 | CCAGCCCACAGCCCCTCCTCCCTCAGTACCCAGGGGTC | chr19:42492375-42492485 | 0 | 1 | 1 | 0 | 0 | - | - | - | - |
| 232734 | GAGGAGGAT | chr19:42729251-42729316 | 0 | 1 | 1 | 0 | 0 | - | - | - | - |
| 232748 | CTTCATCCTCAT | chr19:42819361-42819396 | 0 | 1 | 1 | 0 | 0 | - | - | - | - |
| 232756 | GCCTCCCCCTCCGTCCCCTT | chr19:42848053-42848113 | 0 | 1 | 1 | 0 | 0 | - | - | - | - |
| 232766 | GTCTTCTTCTCC | chr19:42880336-42880394 | 0 | 1 | 1 | 0 | 0 | - | - | - | - |
| 232771 | CCCCCGCAGCCCCCGTCTA | chr19:42905973-42906028 | 0 | 1 | 1 | 0 | 0 | - | - | - | - |
| 232972 | CAAGGCCTTCTCCTACCCCTCCAAGCTGGCAGCCCACCGCCTCACGCACAGCGGCGCCCGCCCCACCCGTGCCCAGACTGCCC | chr19:44039307-44039735 | 0 | 0 | 1 | 0 | 0 | - | - | - | - |
| 232973 | CCCCAGCCCCTCCTCCCTCAGACCCAGGAGTCCAGG | chr19:44050390-44050750 | 0 | 0 | 1 | 0 | 0 | - | - | - | - |
| 232985 | TCTAGAAGCCCCAGCAAGGAGAGAGATCACAGCCGA | chr19:44117338-44118202 | 0 | 0 | 1 | 1 | 40 | 40 | 0 | 20 | 20 |
| 232988 | CTCCTCCTCAGGACCCAGGAGTCCAGGTCCCAGATCCCTGTTCGTCCAGGTCCCCAGCTCT | chr19:44129842-44130085 | 0 | 0 | 1 | 0 | 0 | - | - | - | - |
| 233037 | AGCCCCTCCTCCCTCAGACCCAGGAGTCCTGACCCCC | chr19:44284465-44284909 | 0 | 0 | 1 | 0 | 0 | - | - | - | - |
| 233072 | CATCAGAGAATTCATACTGGTGAGAAACCCTATGAATGTAAAGAATGTGGGAAGGCCTTTAGTTGGGGATCAAGCCTTACTCAA | chr19:44351509-44352927 | 0 | 0 | 1 | 0 | 0 | - | - | - | - |
| 233076 | AAAAGCCTTTCCACATTCCTTACATTCATGAGGTTTCTCACCAGTATGAATTCTCTGATGTGTAAGTAAGGCTTGAGACCCTCTACC | chr19:44377189-44377780 | 0 | 0 | 1 | 0 | 0 | - | - | - | - |
| 233089 | ACTGAAGCCCTTCCCACACTCCTCACATTTGTAGGGTTTCTCTCCAGTGTGGACTCTCTGATGGGCCAGAAGATCTGAGCCCG | chr19:44417637-44418882 | 0 | 0 | 1 | 0 | 0 | - | - | - | - |
| 233097 | GAGAAGCCATTCAAATGTGATACATGTGGCAAGAACTTCCGTCAGAGATCAAGCACTTAATAGGCATTCCATGGTCCACACAGAA | chr19:44470572-44471076 | 0 | 0 | 1 | 1 | 38 | 2 | 0 | 19 | 19 |
| 233110 | GAGAAACCATTCAAATGTGATACATGTGATAAGAGCTTTCTGTCAGTAGATCAAGCACTTAATAGGCATTCGCATGATCCACACAGGCA | chr19:44611165-44611753 | 0 | 0 | 1 | 1 | 40 | 2 | 0 | 20 | 19 |
| 233118 | TCCACAGTGGAGAAAAACCATTCAAATGTGAAGAGTGTGGGAAAAGATTTACTCAGAATTCACAACTTTATACCCATCGCAGAG | chr19:44636196-44636784 | 0 | 0 | 1 | 1 | 40 | 12 | 0 | 20 | 20 |
| 233120 | TCCACACTGGGGAAAAACCATATAAATGTGAGGAGTGTGGGAAGGCTTCAGTCAGGACTGCACACCTTCTAAGCCCATCAAAAAG | chr19:44661682-44662187 | 0 | 0 | 1 | 0 | 0 | - | - | - | - |
| 233127 | ATCTTCAAGCCCATCAGAGAGTCCACACTGGAGAGAAACCATACAAATGTGATGAGTGTGGGAAGAGCTTCAGTCGGACTTCAA | chr19:44680544-44681803 | 0 | 0 | 1 | 0 | 0 | - | - | - | - |
| 233143 | CACACTGGAGAAAAACCATATAAATGTGAGGAGTGTGGTAAGGGCTTCAGTCAGGCTTCAAATCTTCAAGTCCATCAGAGAGTC | chr19:44740038-44741130 | 0 | 0 | 1 | 0 | 0 | - | - | - | - |
| 233147 | CAGAGAGTCCACACTGGAGAGAAACCATACAAATGTGAGGTATGTGGTAAGGGCTTCAGTCAGGATTCACATCTTCAAGCCCAT | chr19:44778139-44778984 | 0 | 0 | 1 | 0 | 0 | - | - | - | - |
| 233152 | TCACATTTATATGGTTTCTCTCCAGTGTGGACTCTCTGATGGGCTTGAAGATTTGAGCTCTGACTGAAGCCCTTACCACAACTA | chr19:44791614-44792871 | 0 | 0 | 1 | 0 | 0 | - | - | - | - |
| 233164 | CCCTTTCCACATACCTCACATTTATATGGTTTCTCTCCTGTGTGGACTCTCTGATGAGCCTGAAGATATGATCTCTGACTGAAG | chr19:44831721-44833059 | 0 | 0 | 1 | 0 | 0 | - | - | - | - |
| 233185 | CCACACTCACGCATTTATAGGGTTTCTCTCCTGTGTGGACCCTCTGATGGATGTGGAGGTCGGAGCTCCGGCCAAAGCCCTTC | chr19:44933054-44933718 | 0 | 0 | 1 | 0 | 0 | - | - | - | - |
| 233189 | AGGGTTTCTCTCCAGTATGAGTTCTCTGATGTGCAACAAGTGCATAACTCTGGCTGAAGGATTTCCCACATTGATTACATTCAT | chr19:44980716-44981961 | 0 | 0 | 1 | 0 | 0 | - | - | - | - |
| 233411 | CTCCAGCTCCCG | chr19:45567645-45567792 | 0 | 0 | 1 | 0 | 0 | - | - | - | - |
| 233416 | CCGCAGCCGCAGCCAGAG | chr19:45570693-45570802 | 0 | 1 | 1 | 0 | 0 | - | - | - | - |
| 233426 | TCCCCCACCCCCTCCCTC | chr19:45649069-45649127 | 0 | 1 | 1 | 0 | 0 | - | - | - | - |
| 233454 | TCCTCCTCCTCCTCCTCCTT | chr19:45801317-45801400 | 0 | 1 | 1 | 0 | 0 | - | - | - | - |
| 233482 | TGTGGGGGCAGCTGGGGCTGTGGT | chr19:45898767-45898839 | 0 | 1 | 1 | 0 | 0 | - | - | - | - |
| 233510 | GGTCCACCCCCACCACCA | chr19:46025623-46025677 | 0 | 1 | 1 | 0 | 0 | - | - | - | - |
| 233573 | AACCAAAACAAGCTCCTGTCCCCAAACAAGAAGCAGAGG | chr19:46248420-46248498 | 0 | 1 | 1 | 0 | 0 | - | - | - | - |
| 233585 | CTCCTCGCCCTCCTCCTC | chr19:46299138-46299174 | 1 | 1 | 1 | 0 | 0 | - | - | - | - |
| 233594 | GGTGGGGGGAAAGGGTACCT | chr19:46320017-46320081 | 0 | 1 | 1 | 0 | 0 | - | - | - | - |
| 233746 | CCCTGGTCAGCTGGGGCCCCTGCCCTCTGATTATCTGCAGCCTCTTCCCTCTGATTATCTGCAGCCTCTGAC | chr19:46914796-46915228 | 0 | 0 | 1 | 0 | 0 | - | - | - | - |
| 233901 | GCATGTCCGCGTGCATGTCGGCGTGCATGTCAGGAT | chr19:47575223-47575295 | 0 | 1 | 1 | 0 | 0 | - | - | - | - |
| 233903 | CACCTCCTTCTGCATCATCGG | chr19:47575922-47575963 | 0 | 1 | 1 | 0 | 0 | - | - | - | - |
| 233909 | GGCGTTGATGGCGGCGGC | chr19:47615761-47615815 | 0 | 1 | 1 | 0 | 0 | - | - | - | - |
| 233956 | GAGGGGGAAGAGAAT | chr19:47774572-47774675 | 0 | 1 | 1 | 0 | 0 | - | - | - | - |
| 233957 | GGTGGGGGCGGGGCCT | chr19:47778107-47778210 | 0 | 1 | 1 | 0 | 0 | - | - | - | - |
| 234085 | TCCTCCTCTGCCGCC | chr19:48204793-48204838 | 0 | 1 | 1 | 0 | 0 | - | - | - | - |
| 234114 | GGCGCGGCGGCA | chr19:48258705-48258779 | 0 | 1 | 1 | 0 | 0 | - | - | - | - |
| 234132 | CTGGGACTGAGCCTGAGC | chr19:48305312-48305564 | 0 | 0 | 1 | 0 | 0 | - | - | - | - |
| 234136 | TGGGCCTGAAATTGGGCCTGGGATTGGGCCTGGGATGGGCCTGGGATCTGGGC | chr19:48305625-48306005 | 0 | 0 | 1 | 0 | 0 | - | - | - | - |
| 234241 | CACACACACACACACACACACACACACACACACACCTCTCCTTCTGGGGGCTCACCTTCCTCCTCCTCCTTCCTCTTGGCTT | chr19:48656913-48657155 | 0 | 0 | 1 | 0 | 0 | - | - | - | - |
| 234286 | GGAGCCAGGGCCAGTGCT | chr19:48800259-48800331 | 0 | 1 | 1 | 0 | 0 | - | - | - | - |
| 234350 | CCCCACCGCCCGCCACAGC | chr19:48945887-48945923 | 0 | 1 | 1 | 0 | 0 | - | - | - | - |
| 234352 | GAAGAAGAAGAGGAG | chr19:48950001-48950045 | 0 | 1 | 1 | 0 | 0 | - | - | - | - |
| 234372 | CCTCCTCGT | chr19:48997171-48997289 | 0 | 1 | 1 | 0 | 0 | - | - | - | - |
| 234376 | CCCCATTCTCCAGCACCTTCTCCTCGCTCTTTGGGGGTGTCAGCT | chr19:49001303-49001574 | 0 | 0 | 1 | 0 | 0 | - | - | - | - |
| 234418 | CAGCCCAGAGCCTGAGCC | chr19:49102515-49102642 | 0 | 1 | 1 | 0 | 0 | - | - | - | - |
| 234444 | CCTCCTCCCTCAGACCCAGGAGTCCAGGCCCCCAGCC | chr19:49167617-49167836 | 0 | 0 | 1 | 0 | 0 | - | - | - | - |
| 234537 | GAGGATGAGGAAGAT | chr19:49377810-49377855 | 0 | 1 | 1 | 0 | 0 | - | - | - | - |
| 234562 | CCACCGCCCCTGCC | chr19:49464200-49464254 | 0 | 1 | 1 | 0 | 0 | - | - | - | - |
| 234599 | ACCCCGCCCATCTCCACCCAA | chr19:49575231-49575291 | 0 | 1 | 1 | 0 | 0 | - | - | - | - |
| 234603 | GTGAGCGTGTGTGAGT | chr19:49644770-49644876 | 0 | 1 | 1 | 0 | 0 | - | - | - | - |
| 234809 | CCCCTTCCCCTCTCCTCTGCATCCTCCT | chr19:50154205-50154309 | 0 | 1 | 1 | 0 | 0 | - | - | - | - |
| 234811 | GAGGAA | chr19:50154450-50154510 | 0 | 1 | 1 | 0 | 0 | - | - | - | - |
| 234813 | CCCGCCGCCGCTCCCGCT | chr19:50155354-50155503 | 0 | 0 | 1 | 0 | 0 | - | - | - | - |
| 234815 | GAGGAGGAGGAAGAAGAA | chr19:50156715-50156768 | 0 | 1 | 1 | 0 | 0 | - | - | - | - |
| 234857 | CCTCCGGCTCCTGCTTCT | chr19:50249922-50250036 | 0 | 1 | 1 | 0 | 0 | - | - | - | - |
| 234905 | CAGCAGGGGCAG | chr19:50464269-50464305 | 0 | 1 | 1 | 0 | 0 | - | - | - | - |
| 234921 | TCTGAGGGCTACTGCCTGGTCT | chr19:50510957-50511085 | 0 | 1 | 1 | 0 | 0 | - | - | - | - |
| 235003 | CACCCCCCTCCCCATCACCCCTAT | chr19:50764251-50764733 | 0 | 0 | 1 | 0 | 0 | - | - | - | - |
| 235068 | CCCCCTAAGGAGGCT | chr19:50938459-50938488 | 0 | 1 | 1 | 0 | 0 | - | - | - | - |
| 235102 | GGGTGG | chr19:50985470-50985518 | 0 | 1 | 1 | 0 | 0 | - | - | - | - |
| 235180 | CAGCCCCTCCTCCCTCAGACCCAGGCATCTCCAGGCCCC | chr19:51125839-51125946 | 0 | 1 | 1 | 0 | 0 | - | - | - | - |
| 235207 | GGGCGAGGCGGGACGGTGGGCAC | chr19:51171556-51171645 | 0 | 1 | 1 | 0 | 0 | - | - | - | - |
| 235208 | GGTGGTGGTGGGCCG | chr19:51172203-51172246 | 0 | 1 | 1 | 0 | 0 | - | - | - | - |
| 235313 | GAGTAGCCAGGGTGG | chr19:51452254-51452284 | 0 | 1 | 1 | 0 | 0 | - | - | - | - |
| 235344 | CTCCTGGGTCTGAGGGAGGAGGGGCTGGGGGCCTGGACTCCTGGGTCTGAGGGAGGAGGGGCTGGGGCCTGGA | chr19:51483252-51483548 | 0 | 0 | 1 | 0 | 0 | - | - | - | - |
| 235352 | GCATCTGGATCAGCTGGAGCGTA | chr19:51518000-51518069 | 0 | 1 | 1 | 0 | 0 | - | - | - | - |
| 235436 | CCCCTCCTTCCTCAGACCCAGGAGTCCAGGGCCCCAT | chr19:51856610-51857425 | 0 | 0 | 1 | 0 | 0 | - | - | - | - |
| 235562 | TTCTCTCCTGTATGAGTTCTCTGATGCTCATGAGCTGTGACTTTCTGGAGAAGGCTTTTCCCACATTCACCACATCCATGGGGC | chr19:52376523-52376858 | 0 | 0 | 1 | 0 | 0 | - | - | - | - |
| 235565 | TGTTCAGTGAGCCTGTACTTCTTGTAGAAGGCTTTCCCACACAAGCTACACCCGTGGGGTTTCTCTCCTCTGTGAGCTCTCTCG | chr19:52394549-52394884 | 0 | 0 | 1 | 0 | 0 | - | - | - | - |
| 235579 | GAGAAACCCTATGAATGCAGTGATATGTGGGAAAGCCTTCTCCAGAAAGTCACGGCTCACTGAACACCAGAGAAACCATACAGGA | chr19:52447820-52449075 | 0 | 0 | 1 | 0 | 0 | - | - | - | - |
| 235585 | CCTGTATGAAATCGCTGATGTACAATGAGATCACCTCTTCTGAATGAAGCCTTTTCCACATTCACTGCATATATAAGGTTTCTCA | chr19:52468680-52469101 | 0 | 0 | 1 | 0 | 0 | - | - | - | - |
| 235596 | CACATTCATTGCATATATAAGGTTTCTCTCCAGTATGAGTTCGCTGATGTACAATGAGACGGCTCTTCACAGTGAAGCCTTTTC | chr19:52496440-52497700 | 0 | 0 | 1 | 1 | 40 | 21 | 16 | 20 | 20 |
| 235597 | ATGCACCTCCTG | chr19:52503604-52503628 | 1 | 1 | 1 | 0 | 0 | - | - | - | - |
| 235604 | TGAAGCCTTTTCCACATTCACTGCATATATAAGGTTTCTCTCCTGTATGAGTTCGCTGATGTACAATGAGAGTGCGCTTCACGG | chr19:52519457-52520289 | 0 | 0 | 1 | 0 | 0 | - | - | - | - |
| 235611 | TATGAGTTCGCTGATGTACAATCAGACTGCTCTTCATAGTGAAGCCTTTTCCACATTCACTGCATATATAGGGTTTCTCTCCTG | chr19:52536989-52538333 | 0 | 0 | 1 | 1 | 40 | 12 | 0 | 20 | 20 |
| 235616 | CCACATTCATTACATTTGTAAGGTTTCTCTCCAGTATGAATTCTCTGATGACTTGCAAGGCTTGAAGTTGATTAAAGACCTTG | chr19:52568654-52570418 | 0 | 0 | 1 | 1 | 40 | 10 | 0 | 20 | 20 |
| 235622 | ATTGCATTTGTAAGGTTTCTCTCCAGTATGAATTCTCCGATGCACTGCAAGATGTGAACGTTGACTGAAGACCTTGCCACATTC | chr19:52618508-52619684 | 0 | 0 | 1 | 1 | 40 | 25 | 0 | 20 | 20 |
| 235630 | TTGCCACAATCATTACATTTGTAAGGTTTCTCTCCAGTATGAATTCTCTGATGACGTGAAAGGCATCCACTAGTAACTGAAGACC | chr19:52658917-52660350 | 0 | 0 | 1 | 0 | 0 | - | - | - | - |
| 235657 | GAGAGAAACCTTACAAATGTAAAGAGTGTGGCAAGGTCTTCAATCGAATTACATACCTTGCACGACATCGAGAAAATGCATACTA | chr19:52793759-52794671 | 0 | 0 | 1 | 0 | 0 | - | - | - | - |
| 235665 | CATACTGGAGAGAAACCTTACAAATGTAATGAATGTGGCAAGGTCTTTAGTCACAATTCATACCTTGCACAACATCGGAGAATT | chr19:52825175-52826344 | 0 | 0 | 1 | 0 | 0 | - | - | - | - |
| 235671 | CATACTGGAGAGAAGCCTTACAAATGTAATGAATGTGACAAGGTCTTCAATCGCAATTCAAACCTTGCACGAACATCAAAGAATT | chr19:52869306-52869894 | 0 | 0 | 1 | 1 | 40 | 8 | 1 | 20 | 20 |
| 235674 | CCTTACAAATGTAATGAATGTGGCAAGGTCTTCAGTCAAAATTCACACCTTGCACAACATCAAAGAATTCATACTGGAGAGAAA | chr19:52887463-52888719 | 0 | 0 | 1 | 0 | 0 | - | - | - | - |
| 235682 | CCTTACAAATGTCATGAATGTGGCAAGGTCTTTAGTAGCAATTCAAACCTTGTCACAACATCAAAGAATTCATACTGGAGAGAAG | chr19:52918738-52920156 | 0 | 0 | 1 | 0 | 0 | - | - | - | - |
| 235691 | GAATTCACACCTTGCACAACATAGGAAAATTCATACTGGAGAGAAGCCTTACAAATGTAATGAATGTGGCAAGGTCTTCAGTCA | chr19:52941387-52942729 | 0 | 0 | 1 | 0 | 0 | - | - | - | - |
| 235707 | GCCATCGTAGATGTCACACTGGTGAGAAACCTTACAAGTGTAATGAATGTGGAAAGTCCTTCAGTTACAAGTCATCCCTTACAT | chr19:53014460-53015981 | 0 | 0 | 1 | 0 | 0 | - | - | - | - |
| 235718 | CCTTACATGCCATCATAGAATTCATACTGGAGAGAAACCTTACAAGTGTAATGAGTGTGGAAAGTCTTTCAGTCAACAATCAC | chr19:53056987-53058481 | 0 | 0 | 1 | 0 | 0 | - | - | - | - |
| 235727 | AGAATTCATACTGGAGAGAAACCTTACAAGTGTAATGAATGTGGCAAAGCTTTTAATCGAACAATCACACCTTAAAAGACATCAGG | chr19:53058599-53059187 | 0 | 0 | 1 | 0 | 0 | - | - | - | - |
| 235733 | TTCATACTGGAGAGAAACCTTACAAGTGTAATGAATGTGGCAAGGTTTTTAATCAAAATCAAACCTTGCACGTCATCATAGAC | chr19:53086183-53087179 | 0 | 0 | 1 | 0 | 0 | - | - | - | - |
| 235743 | TTGCCACATTCATTACATTTGAAAGGTTTCTCTCCAGTATGAATTCTCCGATGTTGTGCAAGGGATGAATTTGACTGAAGACC | chr19:53116426-53117601 | 0 | 0 | 1 | 0 | 0 | - | - | - | - |
| 235774 | TACACTTGTAAGGTTTCTCACCACTATGAAGTCTACGATGGCATATAAGGGATGACCTGTGACTGAAGGTCTTGCTGCACTCAT | chr19:53208350-53209022 | 0 | 0 | 0 | 1 | 40 | 19 | 14 | 20 | 20 |
| 235787 | TACACTTGTAAGGTTTCTCACCACTATGAAGTCTACGATGGCAATGAAGGTATGACCTCTGACTGAAGGTCTTGCTGCACTCAT | chr19:53269255-53269927 | 0 | 0 | 0 | 1 | 40 | 4 | 0 | 20 | 20 |
| 235790 | TTACATTTGTAAGGTTTCTCTCCAGTATGAATTCTACTGATGTGACGTGCAAGGGTTGATTGCCGACTGAAAAGCTTTGTCACATTCA | chr19:53270010-53270514 | 0 | 0 | 1 | 1 | 38 | 0 | 0 | 19 | 19 |
| 235797 | TTGTAAGGTTTCTCTCCAGTATGAAGTCTATGATGACATACAAGGGTTGACTTCTGACTGAAGGTCTTGCCACACTCATTACAC | chr19:53302686-53304450 | 0 | 0 | 1 | 1 | 40 | 10 | 18 | 18 | 20 |
| 235814 | CTTGCCACACTCATTACACTTGTAAGGTTTCTCTCCAGTATGAAGCCTACGATGGATTACAAGGGATGACATCTGACCGAAGGT | chr19:53343873-53344881 | 0 | 0 | 1 | 0 | 0 | - | - | - | - |
| 235825 | TAAGGTTTCTCTCCAGTATGAACTTCTATGATGACATGCAAGGGTTGATTTTTGATCAAAAACCTTGCCACACTCATTACACTTA | chr19:53384392-53384991 | 0 | 0 | 1 | 0 | 0 | - | - | - | - |
| 235858 | TTGCCACATTCATTACACTTGTAAGGTTTCTCTCCAGTATGAACTCTCTGATGTTTTGCAAGGCTTGATCTTCGACTGAAAACC | chr19:53453144-53454401 | 0 | 0 | 1 | 0 | 0 | - | - | - | - |
| 235891 | CATTTGTAAGGTTTCTCTCCAGTATGAATTGCCTGATGAGTTGCAAGGTTGAATTGTGCCTGAAGACCTTGCCACATTCATTA | chr19:53571330-53573010 | 0 | 0 | 1 | 1 | 40 | 0 | 0 | 20 | 20 |
| 235904 | GAGGTTTGAACGCACACTAAAGGACTTTCCCACACTCATTACATTTGTAAGGTTTCTCTCCAGTATGGATGACCTGATGGGTAGT | chr19:53611680-53612688 | 0 | 0 | 1 | 0 | 0 | - | - | - | - |
| 235913 | GGTTTCTCTCCAGTATGAATTCCCTGATGTCTTGCAAGGTGTGAATTCTGACTAAAGACCTTGCCACACTCATTACATTTGTAA | chr19:53643705-53645301 | 0 | 0 | 1 | 1 | 40 | 20 | 20 | 20 | 20 |
| 235918 | TTGTAAGGTTTTTCTCCAGTATGAATTCCTGATGACTTGCTAGGTTTGAATTTTGACTGAAGACCTTGCCACACTCATTACAC | chr19:53667694-53669206 | 0 | 0 | 1 | 1 | 40 | 2 | 10 | 20 | 20 |
| 235962 | GTAAAAGCTTTGCCACATTCATTACATTTGTAAGGTTTCTCTCCAGTATGGATTCTCTGATGACTCAGTAAGATTTGAACGTTCA | chr19:53740405-53741244 | 0 | 0 | 1 | 0 | 0 | - | - | - | - |
| 235971 | TGCTTTGTATCCAATAAATATCAGCGCAGCCTGGCATTCGGGGCCACTACCAGTCTCC | chr19:53761657-53761773 | 0 | 1 | 1 | 0 | 0 | - | - | - | - |
| 235987 | AGAAACCTTACAAGTGTAATGAATGTGGCAAGACCTTCAGTCAGAGTCAACCCTTAATGCCATCATAGAATTCATACTGGAG | chr19:53854730-53857081 | 0 | 0 | 1 | 0 | 0 | - | - | - | - |
| 235990 | ACTGGAGAGAAACCTTACAAGTGTGAAGAATGTGGCAAAGCTTTCAGTCACAAATCAACCCTTACATACCATCATAGACTTCAT | chr19:53884627-53886716 | 0 | 0 | 1 | 0 | 0 | - | - | - | - |
| 236002 | GCCATCGTAGACTTCATACTGGAGAGAAACCTTACAAGTGTAATGAGTGTGGCAAGACCTTCAGTCAGAATCATACCTTACAT | chr19:53911586-53914058 | 0 | 0 | 1 | 0 | 0 | - | - | - | - |
| 236016 | CATGCCATCGTAGACTTCATACTGGAGAGAAACCTTACAAGTGTAATGAGTGTGGCAAGACCTTTAGTCAGAAGTCATCCCTTA | chr19:53958533-53960788 | 0 | 0 | 1 | 0 | 0 | - | - | - | - |
| 236030 | CATCATAGACTTCATACTGGAGAGAAACCTTACAAGTGTAATGAATGTGGCAAAGCTTTTAATCAAAAAGCAAACCTTGCACGT | chr19:53994350-53995931 | 0 | 0 | 1 | 0 | 0 | - | - | - | - |
| 236071 | GAATGTAAAGACTGTGGGAAGGCCTTTCGTGGGGCAATCAACTTACTCAGCATCAAAAAATTCATACTGGTGAGAAACCCTAC | chr19:54080207-54081131 | 0 | 0 | 1 | 1 | 40 | 5 | 0 | 20 | 20 |
| 236226 | CGCCCGCCCCACCCG | chr19:54485984-54486043 | 0 | 1 | 1 | 0 | 0 | - | - | - | - |
| 236283 | TTTCTTTCTTTCTTTCTT | chr19:54579471-54579641 | 0 | 0 | 1 | 0 | 0 | - | - | - | - |
| 236295 | AGGGGCTGGGGGCCTGGACTCCTGGGTCTGAGGGAGG | chr19:54598785-54599112 | 0 | 0 | 1 | 0 | 0 | - | - | - | - |
| 236309 | AGCGGAGGCGGAGGCGAGCAGC | chr19:54652173-54652322 | 0 | 0 | 1 | 0 | 0 | - | - | - | - |
| 236331 | CAGGAGGCCAGCTCAAGC | chr19:54695719-54695821 | 0 | 1 | 1 | 0 | 0 | - | - | - | - |
| 236333 | GAGGAGGAGGAA | chr19:54723031-54723067 | 0 | 1 | 1 | 0 | 0 | - | - | - | - |
| 236524 | CCCTCCCTCACTCAGCATTT | chr19:55341501-55341559 | 0 | 1 | 1 | 0 | 0 | - | - | - | - |
| 236569 | AAAAAAACAAAAACAAA | chr19:55438923-55438976 | 0 | 1 | 1 | 0 | 0 | - | - | - | - |
| 236620 | GGCCCCGCTGGGACA | chr19:55597817-55597847 | 1 | 1 | 1 | 0 | 0 | - | - | - | - |
| 236623 | CAGGCCCCAGCCCCTCCTCCCTCAGACCCAGGAGTC | chr19:55604638-55605731 | 0 | 0 | 1 | 0 | 0 | - | - | - | - |
| 236650 | CCAGGAGTCAGGCCCCCAGCCCCTCCTCCCTCAGACCCAGGAGTCCAGACCCCAGCCCCTCCTCCCTCAGAC | chr19:55648828-55649334 | 0 | 0 | 1 | 0 | 0 | - | - | - | - |
| 236719 | CCTCCTCGT | chr19:55743511-55743600 | 0 | 1 | 1 | 0 | 0 | - | - | - | - |
| 236730 | CACCTGGTCCTCCTTGCACCCCGTCCCCTCCCCATG | chr19:55776347-55776642 | 0 | 0 | 1 | 0 | 0 | - | - | - | - |
| 236761 | GTGGGTGGCGGGGGGC | chr19:55820096-55820223 | 0 | 1 | 1 | 0 | 0 | - | - | - | - |
| 236766 | CCCCTCCTCCCTCAGACCCAGGAGTCCAGGCCCCCAG | chr19:55832066-55832371 | 0 | 0 | 1 | 0 | 0 | - | - | - | - |
| 236784 | TGGGGCCTTCCGGGGAGGAGCAGGTACAGC | chr19:55870726-55871057 | 0 | 0 | 1 | 0 | 0 | - | - | - | - |
| 236843 | CGGTGCTCACAGCAGAAGCGGTAGTGAGC | chr19:55953874-55953991 | 0 | 1 | 1 | 0 | 0 | - | - | - | - |
| 236851 | GGGTCTGAGGGAGGAGGGCTGAGCCTGGATCCT | chr19:55967240-55967717 | 0 | 0 | 1 | 0 | 0 | - | - | - | - |
| 236855 | GAGCGGCCCTACAAATGTGCCGAGTGCGGCAAGGCCTTCAAGCGCTCCTCCCGGCTGCGCCATCCACCAGCGGGACCACACGGGC | chr19:55993910-55994413 | 0 | 0 | 1 | 0 | 0 | - | - | - | - |
| 236857 | ACCACGGTCCAGCTCCAGCCAGCACAGGAGGTG | chr19:55995047-55995182 | 0 | 1 | 1 | 0 | 0 | - | - | - | - |
| 236865 | CCCTCACCCCACTACTAC | chr19:56029086-56029410 | 0 | 0 | 1 | 0 | 0 | - | - | - | - |
| 236923 | GCCACG | chr19:56090906-56090960 | 0 | 1 | 1 | 0 | 0 | - | - | - | - |
| 236931 | CCCCCGCCGCAG | chr19:56125173-56125209 | 0 | 1 | 1 | 0 | 0 | - | - | - | - |
| 236932 | CCTCCTCGTCCTCATCTTCGT | chr19:56125258-56125321 | 0 | 1 | 1 | 0 | 0 | - | - | - | - |
| 236968 | ACAGCAGTACATCAACCTGCAAAGAAACACACCATCTCCCAGCCCACTGA | chr19:56226575-56226675 | 0 | 1 | 1 | 0 | 0 | - | - | - | - |
| 236999 | TAGCGTAAGTCTCCGTTTATTGAGACCACTGATTGGGTTTCAGAGAAGACTA | chr19:56373521-56374144 | 0 | 0 | 1 | 0 | 0 | - | - | - | - |
| 237090 | GCCGCAGTCGGAGCAGGCGTAGGGCTTCTCGCCCGTGTGGATGCGCTGGTGCTGCACCAGGTTGCGAGCTCCAGCGAGAAGCGTCTT | chr19:56600072-56600324 | 0 | 0 | 1 | 0 | 0 | - | - | - | - |
| 237203 | TAAAGGCCTTCCCACATTCCTTACATTCATAGGGTTTCTCACCAGTATGAATTCTCTGATGTCGTATAAGATGTGAGCCTGAT | chr19:56895488-56896328 | 0 | 0 | 1 | 0 | 0 | - | - | - | - |
| 237209 | CATCAGAGAATTCATACTGGAGAGAAACCTTATGAATGTAATGAATGTAGGAAAGCCTTCAGCCAGAGTGCACACCTTGCTCAA | chr19:56934714-56935638 | 0 | 0 | 1 | 1 | 40 | 21 | 0 | 20 | 20 |
| 237210 | GACTAAATGCCTTCCCACATTATTACATTCATAGGGTTTCTCTCCAGTATGACTTCTTTCATGTAGAATAAGAGTATGAGCCACT | chr19:56952583-56953178 | 0 | 0 | 1 | 0 | 0 | - | - | - | - |
| 237223 | AGAATTCATACTGGAGAAAAACCATATGAATGTAAAGAATGTGGAAAAGCCTTCAAGCAAAGCGCAACACCTTGCTCAGCATCAA | chr19:57036111-57036786 | 0 | 0 | 1 | 0 | 0 | - | - | - | - |
| 237224 | GAGAATTCATACTGGAGAGAAACCCTATGAATGTAATGAATGTGGAAAAGCTTTCAGAACAGTTCACACCTTGCACAACATCA | chr19:57036869-57037460 | 0 | 0 | 1 | 0 | 0 | - | - | - | - |
| 237229 | AGAATTCATACTGGAGAGAAACCTTATGAATGTAATGAATGTGGGAAAGCCTTCAGCCAGAATGCACATCTTGCTCAACATCAG | chr19:57088538-57089885 | 0 | 0 | 1 | 0 | 0 | - | - | - | - |
| 237235 | CACCAGCGGATCCACACCGGCGAGAAGCCCTACGTGTGCGGCGAGTGCGGCAAGGCCTTCAGCCAGAGCTCCTACCTCATCGAG | chr19:57133180-57134103 | 0 | 0 | 1 | 0 | 0 | - | - | - | - |
| 237254 | TGGTGCTGGATCAGGTAGGAGCCCTGGCTGAAGGCCTTGCCGCACTCGGGGCACGTGTAGGGCTTCTCGCCCGTGTGCGTGCGC | chr19:57175172-57176259 | 0 | 0 | 1 | 0 | 0 | - | - | - | - |
| 237309 | TCCCTCTGGCTCTTCAGCTCTT | chr19:57325378-57325635 | 0 | 0 | 1 | 0 | 0 | - | - | - | - |
| 237314 | TCACGTTCATGT | chr19:57328001-57328036 | 0 | 1 | 1 | 0 | 0 | - | - | - | - |
| 237487 | CAGCCCAG | chr19:57743127-57743151 | 1 | 1 | 1 | 0 | 0 | - | - | - | - |
| 237504 | GGAAAGACCTTCAACCGCAGGTCACACCTCACACGGCACCAGCGGACTCACAATGGAGAGAAGCCCTTTGTGTGCAATGAATGT | chr19:57802597-57803184 | 0 | 0 | 1 | 0 | 0 | - | - | - | - |
| 237511 | ACCTCATTCGACACTACAGCATTCACACTGGAGAGAAACCCTATGAATGCGTCGAGTGTGGAAAGGCCTTCAACCGCAGCGCAA | chr19:57840223-57840559 | 0 | 0 | 0 | 1 | 4 | 1 | 0 | 2 | 2 |
| 237521 | GCACCAGAGAATTCACACTGGAGAAAGGCCTTATGAGTGCAGTGAATGTGGGAAAGCCTTCAGCCGAAGGACACACTTGTTCA | chr19:57868124-57869303 | 0 | 0 | 1 | 0 | 0 | - | - | - | - |
| 237529 | CATCAGAGAATTCACACTGGAGAAAGGCCTTATGAGTGCAGTGAATGTGGGAAATTCTTTATGGAAAGGTCCACACTCATTAGA | chr19:57888863-57889772 | 0 | 0 | 1 | 0 | 0 | - | - | - | - |
| 237536 | AATGTGGGAAATTCTTTAGGTACAACTCCACACTCATTAAACATCAGAGAGTTCACACTGGAGAAAGGCCTTATGAGTGCAGAG | chr19:57910340-57911263 | 0 | 0 | 1 | 0 | 0 | - | - | - | - |
| 237540 | TTCAGCACCAGAAAATTCACACTGGAGAAAGGCCTTATGAGTGCAGTGAATGTGGGAAAGCCTTCCTTACAAAGGCTCACCTAC | chr19:57931644-57932904 | 0 | 0 | 1 | 0 | 0 | - | - | - | - |
| 237545 | ACTGGAGAAAAGCCTTATGAATGCAGCAAATGTGGGAAATTCTTTTTGGATAGCTACAAACTTGTTATTCATCAGAGAATTCAC | chr19:57956250-57956835 | 0 | 0 | 1 | 0 | 0 | - | - | - | - |
| 237572 | CACACTGGAGAAAGCCTTATAAGTGCAGTGAATGTGGGAAATTTTTTAGCCACAACTCCAACCTTATCAAACATCAGAGAATT | chr19:58004849-58005740 | 0 | 0 | 1 | 0 | 0 | - | - | - | - |
| 237577 | CACACTGGAGAAAGCCTTATGAGTGCAGTGAATGTGGGAAATTCTTTAGCCACAGCTCCAGCCTTATTAAACATCAGAGAGTT | chr19:58018099-58018998 | 0 | 0 | 1 | 0 | 0 | - | - | - | - |
| 237584 | AGAAAAGCCTTATGTGTGCAATGAATGTGGGAAATCATTCCGCCACAAACAAACACTTGTTGGCAACAGCAGAGAATCCACACTGG | chr19:58049184-58050285 | 0 | 0 | 1 | 0 | 0 | - | - | - | - |
| 237588 | ACTTTGGCTAAAAGATTTCCCACATTCACCACACTCATAAGGCCTTTCTCCAGTGTGAATTCTGCGATGTTCAATAAGGATGGA | chr19:58084004-58084592 | 0 | 0 | 1 | 0 | 0 | - | - | - | - |
| 237592 | ACTGGAGAAAGGCCTTATGAGTGTGGCGAATGTGGGAAATCCTTTAGCCAAAACTCCACCCTTATTAAACACCAGAAAATTCAC | chr19:58101962-58102718 | 0 | 0 | 1 | 1 | 40 | 32 | 0 | 20 | 20 |
| 237597 | TCATTCAACACCAAAGAGTTCACACTGGAGAAAGGCCTTATGAGTGCAGTGAATGTGGGAAATCCTTTAGCCAAAACTCACC | chr19:58117569-58118661 | 0 | 0 | 1 | 1 | 40 | 13 | 0 | 20 | 20 |
| 237600 | AGTGCAGCGAATGTGGGAAAGCCTTCAGCCGCAAAGACAACACTTGTCCAGCACCAGAGAATCCATACTGGAGAAAGGCCTTATG | chr19:58132016-58132772 | 0 | 0 | 1 | 1 | 40 | 12 | 0 | 20 | 20 |
| 237606 | CCTCATTCAACACCAGAGAGTTCACACTGGAGAAAGGCCTTATGAGTGCAGTGAATGTGGGAAATCCTTTAGCCAAAGCTCCAG | chr19:58152666-58153592 | 0 | 0 | 1 | 0 | 0 | - | - | - | - |
| 237617 | TTCACACTGGAGAAAGGCCTTATGAATGCAGTGAATGTGGGAAATCCTTTAGCCACAAATCTGACCTCATTCAACACCAGAGAG | chr19:58198541-58199717 | 0 | 0 | 1 | 1 | 40 | 27 | 0 | 20 | 20 |
| 237619 | CACTCATAAGGCCTTTCTCCAGTGTGAACTCTCCGATGTTTAATGAGGCTAGACTTTTGCTAAAGGATTTCCCACATTCACTG | chr19:58212988-58213828 | 0 | 0 | 1 | 1 | 40 | 1 | 16 | 20 | 20 |
| 237628 | GAGTTCACACTGGAGAAAGACCTTATGAGTGTGGAGAATGTGGGAAATCTTTTAGTACAAGGCACACCTCATTGAACATCAGA | chr19:58265264-58266426 | 0 | 0 | 1 | 0 | 0 | - | - | - | - |
| 237633 | TTCACACTGGAGAAAGGCCTTATGAATGCAGTGAATGTGGGAAATCCTTTGCTGAAAACTCCAGCCTTATTAAACACTGAGAG | chr19:58290466-58291388 | 0 | 0 | 1 | 0 | 0 | - | - | - | - |
| 237637 | CATCAGCGAATTCACACTGGAGAAAGACCTTATAAGTGTGGAGAATGTGGGAAATCTTTTAGTTAAAAGGACACCTTAGGAGC | chr19:58352819-58353996 | 0 | 0 | 1 | 0 | 0 | - | - | - | - |
| 237646 | CATCAGCGAGGTCACACTGGAGAAAGGCCTTATGAGTGTAGAGAATGTGGGAAATCTTTTAGTCAAAAGGGCAGCCTTATTCAC | chr19:58370551-58371633 | 0 | 0 | 1 | 0 | 0 | - | - | - | - |
| 237651 | TTCCCACAATCCTCACATTCATATGGCTTTTCTCCAGTGTGAACTCTGGTGTACAAGGAGGTGAGTACTTCTTGCTAAATAACT | chr19:58384087-58385347 | 0 | 0 | 1 | 0 | 0 | - | - | - | - |
| 237656 | TTTGCTAAAGGATTTCCCACATTCTCCACATTCATGTTTTTTTTCAGTGTGAACTCTCTGATGATTACTGAAGCTAACATA | chr19:58385499-58386079 | 0 | 0 | 1 | 0 | 0 | - | - | - | - |
| 237661 | GATTTCCCACATTCTCCACACTCATAAGGCCTTTCTCCAGTGTGAACTCGCTGATGGTTGAATAAGGCTGCCCTTCTGACCAAAA | chr19:58420398-58420985 | 0 | 0 | 1 | 0 | 0 | - | - | - | - |
| 237667 | GTGTGAACTCTCTGATGTCGAAGAGAGAAGAGCTTCGAGAAATGATTTCCCACATTCACTGCACTCATAAGGCCTTTCTCCA | chr19:58437539-58438955 | 0 | 0 | 1 | 0 | 0 | - | - | - | - |
| 237676 | ATTTCCCACATTCACTGCACTCATAAGGCCTTTCTCCAGTGTGAACTCTCTGGTGTTAATGAGGCTAGAGCTCTGGCTAAAGG | chr19:58452344-58453521 | 0 | 0 | 1 | 0 | 0 | - | - | - | - |
| 237695 | CACATTCATTACATTCAAAAGGTTTCTCTCCTGTATGAATTCTCTTATGTACAATAAGATGAGAGTTCCAGCTGAAAGATTTCC | chr19:58490411-58491079 | 0 | 0 | 1 | 0 | 0 | - | - | - | - |
| 237730 | CCAGCACCAGAGAACCACACAGGAGAGAAGCCCTATGAGTGCAGTGAGTGTGGGAAAGCCTTCAGCCAGAGCTCCACCTCAC | chr19:58578709-58579887 | 0 | 0 | 1 | 0 | 0 | - | - | - | - |
| 237771 | TTGACAACCCTGAGTCCCAGGCAAACAGTGGCGCTCTTGACACAAACCAAGTTTCGCTCCACAAAA | chr19:58723745-58723877 | 0 | 1 | 1 | 0 | 0 | - | - | - | - |
| 237783 | CACACTGGAGAGAAACCCTATGAGTGTACCTGTGTGGGAAATCCTTCAGCCAGAGATCCAAACTTATTACACATCAGAGAATT | chr19:58773175-58774005 | 0 | 0 | 1 | 0 | 0 | - | - | - | - |
| 237788 | GGCCAGAAGGATCTGAGAGAGTGT | chr19:58788582-58788654 | 0 | 1 | 1 | 0 | 0 | - | - | - | - |
| 237802 | TGTGGGAAAACCTTCAGCCAGCAGCACGCACCTCACCCAACACCAGCGCATCCACACCGGGGAGAAGCCCTACAAGTGTGACGCG | chr19:58850284-58850708 | 0 | 0 | 1 | 0 | 0 | - | - | - | - |
| 237811 | GAAGGCCTTGCCGCAGTCGGCGCAGGCGAAGGGCTTGTCGCCCGAGTGCGAGCGCCGGTGGTGCGCGCAGGCTCGGAACTGCCGCG | chr19:58867648-58868748 | 0 | 0 | 1 | 0 | 0 | - | - | - | - |
| 237828 | CCACATTCACTGCACTCATAAGGCCTTTCTCCAGTGTGAACTTTCCAGTGCTGAATGAGAGTGGAGCTTTGGCTGAAGGCTTT | chr19:58944912-58946084 | 0 | 0 | 1 | 0 | 0 | - | - | - | - |
| 237837 | GCCCTACGCGTGCCCCGAGTGCGGCAAGGCCTTCAGCCACAGCTCCACGCTGACGCAGCACCAGCGCATCCACAGCGGCCGAGAA | chr19:58967159-58967747 | 0 | 0 | 0 | 1 | 40 | 9 | 0 | 2 | 1 |
| 237838 | GCCCTACGCGTGCCCCGAGTGCGGCAAGGCCTTCAGCCACAGCTCCACGCTGACGCAGCACCAGCGCATCCACAGCGGCCGAGAA | chr19:58982707-58983295 | 0 | 0 | 0 | 1 | 40 | 2 | 0 | 1 | 2 |
| 237859 | GTGGATGCGCAGATGCTGCGTGAGCGTGGGCCGCTGGCGGAAGGCCTGGCCACACTCAGGGCAGGCGAAGGGCCGTTCGCCCGT | chr19:59073534-59074595 | 0 | 0 | 1 | 0 | 0 | - | - | - | - |
| 238430 | CAGGTAGGGTTTGTATTTTCTGATTCATGATGTAACACAT | chr2:1243545-1243625 | 0 | 1 | 1 | 0 | 0 | - | - | - | - |
| 238799 | TCCTCCTCC | chr2:1946764-1946962 | 0 | 0 | 1 | 0 | 0 | - | - | - | - |
| 240072 | CAGCAGCAGCGG | chr2:5833884-5833921 | 0 | 1 | 1 | 0 | 0 | - | - | - | - |
| 241006 | AGCCAATGGGAAGGGCCGGGGCATGCCAA | chr2:10262740-10262827 | 0 | 1 | 1 | 0 | 0 | - | - | - | - |
| 241247 | GCGGGGCGGAGGCTGCGAGGGCGCGC | chr2:11052493-11052573 | 0 | 1 | 1 | 0 | 0 | - | - | - | - |
| 242170 | GATGAAGAGGAA | chr2:16085625-16085649 | 1 | 1 | 1 | 0 | 0 | - | - | - | - |
| 242996 | CGCCAGCAGCGCAGCAGCAG | chr2:21266748-21266829 | 0 | 1 | 1 | 0 | 0 | - | - | - | - |
| 243447 | GTGTGCTGCTGTGGTCTG | chr2:24260755-24260807 | 0 | 1 | 1 | 0 | 0 | - | - | - | - |
| 243489 | TCAAAGTATCCTTATCCTTACGTTGTTTCTCCTCAGCTT | chr2:24494613-24494803 | 0 | 0 | 1 | 0 | 0 | - | - | - | - |
| 243593 | GAGTACTCGGCC | chr2:25141794-25141830 | 0 | 1 | 1 | 0 | 0 | - | - | - | - |
| 243756 | GGCGGCAGCAGCAGCTGC | chr2:25967153-25967189 | 0 | 1 | 1 | 0 | 0 | - | - | - | - |
| 243776 | TGGTTTTAAAACTTTC | chr2:26068147-26068194 | 0 | 1 | 1 | 0 | 0 | - | - | - | - |
| 243828 | TCCTCCAGCAGCTTCTCCTTC | chr2:26203290-26203416 | 0 | 1 | 1 | 0 | 0 | - | - | - | - |
| 243873 | CGGGGTCCCAGGAGAGGGGGCGCGGGGA | chr2:26395722-26396111 | 0 | 0 | 1 | 0 | 0 | - | - | - | - |
| 243878 | GCCCGCGCCGCGCGCGCCCCGGCCT | chr2:26407837-26407993 | 0 | 0 | 1 | 0 | 0 | - | - | - | - |
| 243942 | GCCCCCAGGCCCCAGCCCCCAGGCCCCA | chr2:26697123-26697403 | 0 | 0 | 1 | 0 | 0 | - | - | - | - |
| 244050 | CTGCAAGGACTGAGCGGGCGTC | chr2:27305012-27305081 | 0 | 1 | 1 | 0 | 0 | - | - | - | - |
| 244052 | GCCTCTGCCTGGCCCCCAGCTTCCCCTCTGGGCCCGGGGGCATCTCCTTCA | chr2:27324253-27324558 | 0 | 0 | 1 | 0 | 0 | - | - | - | - |
| 244096 | AGAGCGGCCCGATGGGCCTTAAGGTG | chr2:27529387-27529464 | 0 | 1 | 1 | 0 | 0 | - | - | - | - |
| 244122 | ACTGGAGGGGAGGGG | chr2:27659965-27659995 | 0 | 1 | 1 | 0 | 0 | - | - | - | - |
| 244123 | CCAGGTGGGAGCGGGCCCGGGACGGAGGCGGGGC | chr2:27665151-27665291 | 0 | 1 | 1 | 0 | 0 | - | - | - | - |
| 244140 | TGGCATCCGCT | chr2:27717529-27717564 | 0 | 1 | 1 | 0 | 0 | - | - | - | - |
| 244177 | TCAGTGTGTAAATTCTAATGGGTGCAACCCTGGGCCACATTTGCAAGGTGTAAATTCTGCATCCATTCCAGCAGCCAAAAGCT | chr2:27798526-27799510 | 0 | 0 | 1 | 0 | 0 | - | - | - | - |
| 244179 | CCCTCTTGGAGAAACCATCGCAGT | chr2:27804119-27804839 | 0 | 0 | 1 | 1 | 40 | 40 | 0 | 20 | 20 |
| 244197 | GAAGAGGAGGAG | chr2:27907969-27908055 | 0 | 1 | 1 | 0 | 0 | - | - | - | - |
| 245180 | GGCCTCCACGACCACCTC | chr2:33809973-33810027 | 0 | 1 | 1 | 0 | 0 | - | - | - | - |
| 245781 | AGAGAGCTGTCAGGTA | chr2:37311700-37311732 | 1 | 1 | 1 | 0 | 0 | - | - | - | - |
| 245789 | TCTCAGGATCATAATCACTGC | chr2:37349667-37349731 | 0 | 1 | 1 | 0 | 0 | - | - | - | - |
| 246584 | GGGAGGGGGAGGCGGAGGGGGCGG | chr2:42275056-42275370 | 0 | 0 | 1 | 0 | 0 | - | - | - | - |
| 246740 | GAGGGAGCAGAGGAGGG | chr2:42991110-42991182 | 0 | 1 | 1 | 0 | 0 | - | - | - | - |
| 246825 | GGAGGCCGAGGAACAGGA | chr2:43452012-43452069 | 0 | 1 | 1 | 0 | 0 | - | - | - | - |
| 246912 | GAGTGATAACATTAGGGATGGATACAGGGAGGTTGCTCCACTTTTCTTTAGAAGGCGACCCAAATAACTAGCAGCCCTTTCCTGGAT | chr2:43934401-43934575 | 0 | 0 | 1 | 0 | 0 | - | - | - | - |
| 246915 | TTAAATGATTTAAGGTAAAATACTTATATGTTG | chr2:43958727-43958829 | 0 | 1 | 1 | 0 | 0 | - | - | - | - |
| 247126 | GCGGCGGCGGGAACGGTGCGGGAG | chr2:45169337-45169457 | 0 | 1 | 1 | 0 | 0 | - | - | - | - |
| 247364 | CAGCGGCAGCGGCAGCACGAGGTGGTGATGGAGCAGCTG | chr2:46707801-46707921 | 0 | 1 | 1 | 0 | 0 | - | - | - | - |
| 247624 | GGCGGCGGCGGAGGCTGCTGCTGCGGCTGCTGCTGC | chr2:48132677-48132788 | 0 | 1 | 1 | 0 | 0 | - | - | - | - |
| 247798 | GCTGCAGCA | chr2:48982755-48982809 | 0 | 1 | 1 | 0 | 0 | - | - | - | - |
| 248715 | TCTTCTTCCTCCTCC | chr2:55277293-55277355 | 0 | 1 | 1 | 0 | 0 | - | - | - | - |
| 249194 | AGAATTTACCTGAGG | chr2:58425704-58425734 | 1 | 1 | 1 | 0 | 0 | - | - | - | - |
| 249500 | CTCCTCTTC | chr2:60688534-60688597 | 0 | 1 | 1 | 0 | 0 | - | - | - | - |
| 249632 | TCTTCTTCCTCC | chr2:61454297-61454333 | 0 | 1 | 1 | 0 | 0 | - | - | - | - |
| 250467 | CATGCAGCCAGGTC | chr2:66664937-66664964 | 0 | 1 | 1 | 0 | 0 | - | - | - | - |
| 250603 | ACTAACTCAGCAACAAGACATTAGAAAGGACAGTAAGACATCAGAAAGTATATGTGAGATCAATAATAATTCCGAACATGGAGCCAA | chr2:67631670-67631844 | 1 | 0 | 1 | 0 | 0 | - | - | - | - |
| 250697 | TTTTAGGAAATTACAT | chr2:68274262-68274337 | 0 | 1 | 1 | 0 | 0 | - | - | - | - |
| 250957 | GCTGTT | chr2:69741739-69741781 | 0 | 1 | 1 | 0 | 0 | - | - | - | - |
| 251231 | CAGGCGGGGGCCAGGGATCGCCTCCCGAGAGGTGCCCAGGCCGTGGCCCAGAGTCGCTTCCCCACTGCCCCGCCCACCAGC | chr2:71206065-71206227 | 0 | 0 | 1 | 0 | 0 | - | - | - | - |
| 251232 | CGACCAGACGGCAAT | chr2:71206343-71206373 | 0 | 1 | 1 | 0 | 0 | - | - | - | - |
| 251295 | GAAGATATTGATTCTGAT | chr2:71360631-71360687 | 0 | 1 | 1 | 0 | 0 | - | - | - | - |
| 251394 | CATCATCCTCTT | chr2:71909740-71909803 | 0 | 1 | 1 | 0 | 0 | - | - | - | - |
| 251663 | GAAGAG | chr2:73452993-73453047 | 0 | 1 | 1 | 0 | 0 | - | - | - | - |
| 251747 | GATGGAAACTTCCCTGGG | chr2:74042198-74042234 | 0 | 1 | 1 | 0 | 0 | - | - | - | - |
| 251869 | GCACAAGAAAAAACACAAGAA | chr2:74682578-74682620 | 0 | 1 | 1 | 0 | 0 | - | - | - | - |
| 251871 | CCACTTCCCGCTTCGTAC | chr2:74699661-74699695 | 0 | 1 | 1 | 0 | 0 | - | - | - | - |
| 253678 | CTTGCTAGGGCTGTCTTTTGGGTCTGCGCCTCCGCACCCGA | chr2:85554101-85554689 | 0 | 0 | 1 | 1 | 40 | 20 | 0 | 20 | 20 |
| 253768 | CGCACCGCCAGCGCCCC | chr2:85981782-85981873 | 0 | 1 | 1 | 0 | 0 | - | - | - | - |
| 254293 | GCGGGCGCG | chr2:88751683-88751736 | 0 | 1 | 1 | 0 | 0 | - | - | - | - |
| 255387 | CCACATTCATTACATTTGTAGGGTTTCTCTCCAGTATGAAATCTGTAATGCAGAATAAGAGATGAACTCTGGCTGAAGGCTCTC | chr2:95815096-95815684 | 0 | 0 | 1 | 1 | 40 | 21 | 0 | 20 | 20 |
| 255676 | GGAGCGGGAGGAGGAGCA | chr2:97215077-97215113 | 1 | 1 | 1 | 0 | 0 | - | - | - | - |
| 255763 | GCCGAGGCAGGGCAGCAGGGCC | chr2:97637938-97637981 | 0 | 1 | 1 | 0 | 0 | - | - | - | - |
| 255863 | AGGACAGGCTCAGGG | chr2:98275287-98275363 | 0 | 1 | 1 | 0 | 0 | - | - | - | - |
| 256043 | TCTCTCGGGCTCCGTCCCCGCTCC | chr2:99439301-99439395 | 0 | 1 | 1 | 0 | 0 | - | - | - | - |
| 256096 | AATTATTAAATATTTATA | chr2:99786886-99787002 | 0 | 1 | 1 | 0 | 0 | - | - | - | - |
| 256128 | AAAAAGAAGAAAGAAAAGAAG | chr2:99980124-99980278 | 0 | 0 | 1 | 0 | 0 | - | - | - | - |
| 256129 | GAAGAGGAG | chr2:99992850-99992973 | 0 | 1 | 1 | 0 | 0 | - | - | - | - |
| 256976 | GCGGCGGGGGTGGCG | chr2:105472043-105472134 | 0 | 1 | 1 | 0 | 0 | - | - | - | - |
| 257861 | GGGCCCCGAGGCGGCGCT | chr2:110372086-110372209 | 0 | 1 | 1 | 0 | 0 | - | - | - | - |
| 257862 | GGAGGGCAGTGGGGGA | chr2:110373550-110373580 | 0 | 1 | 1 | 0 | 0 | - | - | - | - |
| 258226 | CCAGGCCAGTGTCCCTCCCGCCTCTCT | chr2:112896303-112897929 | 0 | 0 | 1 | 0 | 0 | - | - | - | - |
| 258266 | CTACAGTGATGACAACTTCGGTAA | chr2:113067550-113067620 | 0 | 1 | 1 | 0 | 0 | - | - | - | - |
| 258288 | GGCCGCCGCCTCAACAGAGCGCGCCAGGGAGCAGCGCCCTCGGGAGCCATGACCCCTGACCCATCGAGGCCGCCGCCGGGCCGGGTCGA | chr2:113190457-113190996 | 0 | 0 | 1 | 0 | 0 | - | - | - | - |
| 258321 | TCCGGCGTGTACCGAGAGACTGGCG | chr2:113300001-113300077 | 0 | 1 | 1 | 0 | 0 | - | - | - | - |
| 258405 | ATCCTGGGGAAAGTGAGGGAAATATGGACATCACATGGAACAACATCCAGGAGACTCAGGCCTCTAGGAGTAACTGGGTAGTGTGC | chr2:113888105-113888449 | 1 | 0 | 1 | 0 | 0 | - | - | - | - |
| 259795 | CGACCTGGGGCTGCCAGACGA | chr2:121746642-121746684 | 0 | 1 | 1 | 0 | 0 | - | - | - | - |
| 260958 | CTCCGCGGCGGCTGGGA | chr2:127864386-127864457 | 0 | 1 | 1 | 0 | 0 | - | - | - | - |
| 261025 | GAGGCTCCTCACTTTCTGAGTCACTGATACGAGGTTTGGGAAGCTCCTCATTTTCAGAATCACTGGCCTGGTGCCTTGG | chr2:128262556-128263332 | 0 | 0 | 1 | 0 | 0 | - | - | - | - |
| 261070 | CCCTGTGGGCCAGGTGA | chr2:128477400-128477525 | 0 | 1 | 1 | 0 | 0 | - | - | - | - |
| 261641 | GACGGG | chr2:131129928-131129972 | 0 | 1 | 1 | 0 | 0 | - | - | - | - |
| 261689 | CCCGCGCGCCCCTCGCCCGGCGCCCACTCCCGCGCCCCCCA | chr2:131355209-131355463 | 0 | 0 | 1 | 0 | 0 | - | - | - | - |
| 264022 | CGCCTCCCGCTCCGC | chr2:145147377-145147421 | 0 | 1 | 1 | 0 | 0 | - | - | - | - |
| 265079 | AAGAAGTGCTTTAGT | chr2:152325053-152325082 | 0 | 1 | 1 | 0 | 0 | - | - | - | - |
| 265111 | TGCTGGCTGTGCCAG | chr2:152584315-152584359 | 0 | 1 | 1 | 0 | 0 | - | - | - | - |
| 266225 | TTCATCATC | chr2:160289286-160289361 | 0 | 1 | 1 | 0 | 0 | - | - | - | - |
| 266620 | CTCATCTTCACCACCATCATCAATA | chr2:163133988-163134037 | 0 | 1 | 1 | 0 | 0 | - | - | - | - |
| 267066 | GAGGAGGAGGAA | chr2:166535618-166535666 | 0 | 1 | 1 | 0 | 0 | - | - | - | - |
| 267413 | AAGATATGAACATCTGAATTTAAACATCTCTGCAGAGGTCACACCTGTGAATCTGACCGTTTCTGTGTAGACAGTCTAAGCCTTCCAAAACCTCTTT | chr2:169020107-169020301 | 0 | 0 | 1 | 0 | 0 | - | - | - | - |
| 267422 | GCCGGG | chr2:169103796-169103845 | 0 | 1 | 1 | 0 | 0 | - | - | - | - |
| 267711 | ATGATGAAC | chr2:170667794-170667831 | 0 | 1 | 1 | 0 | 0 | - | - | - | - |
| 267715 | GCGGCGGCGGTCCGGAG | chr2:170684236-170684354 | 0 | 1 | 1 | 0 | 0 | - | - | - | - |
| 267745 | GTATGTAAATTTTTTGAT | chr2:170770656-170770710 | 0 | 1 | 1 | 0 | 0 | - | - | - | - |
| 267872 | CCGCCCCCCCGCC | chr2:171627336-171627437 | 0 | 1 | 1 | 0 | 0 | - | - | - | - |
| 267873 | GCCCCC | chr2:171627478-171627540 | 0 | 1 | 1 | 0 | 0 | - | - | - | - |
| 268525 | GGCGGCGGCAGCGGC | chr2:175202174-175202249 | 0 | 1 | 1 | 0 | 0 | - | - | - | - |
| 268527 | GAGGAAGAG | chr2:175213768-175213805 | 0 | 1 | 1 | 0 | 0 | - | - | - | - |
| 268528 | TTCTTTTTTC | chr2:175213849-175213900 | 0 | 1 | 1 | 0 | 0 | - | - | - | - |
| 268535 | TCAAATTTATCAG | chr2:175292580-175292623 | 0 | 1 | 1 | 0 | 0 | - | - | - | - |
| 268560 | CCACCGCCTCCGCCA | chr2:175440020-175440095 | 0 | 1 | 1 | 0 | 0 | - | - | - | - |
| 268771 | CCGCCGCCACCACCACCA | chr2:176944991-176945027 | 0 | 1 | 1 | 0 | 0 | - | - | - | - |
| 268774 | CGGGGCCAGGGCCAGGGC | chr2:176957578-176957666 | 0 | 1 | 1 | 0 | 0 | - | - | - | - |
| 268777 | GCGGCAGCGGCGGGG | chr2:176972309-176972467 | 0 | 0 | 1 | 0 | 0 | - | - | - | - |
| 268781 | GGTCTGAGGCC | chr2:176983958-176983991 | 0 | 1 | 1 | 0 | 0 | - | - | - | - |
| 269162 | TTTCCTCTTCAGGAGCAA | chr2:179514941-179514977 | 1 | 1 | 1 | 0 | 0 | - | - | - | - |
| 269171 | TTCAACTCTATGTTCTTC | chr2:179536773-179536899 | 0 | 1 | 1 | 0 | 0 | - | - | - | - |
| 269174 | ACTTCCTCTTCAGGTAGAACTTCCTCTTCCTCAGGTAGA | chr2:179542388-179542631 | 0 | 0 | 1 | 0 | 0 | - | - | - | - |
| 269182 | TATCTCTCTAGAGTCTCTCCTGGGGGTGTGGAG | chr2:179611776-179612079 | 0 | 0 | 1 | 0 | 0 | - | - | - | - |
| 269184 | CAGGAGACATCCTTGCAGGGGACATCCGTG | chr2:179642592-179642681 | 0 | 1 | 1 | 0 | 0 | - | - | - | - |
| 269186 | TCTTTTTCATAC | chr2:179644793-179644817 | 1 | 1 | 1 | 0 | 0 | - | - | - | - |
| 269344 | TCTTCCTCTTCTTCTCCC | chr2:180830606-180830662 | 0 | 1 | 1 | 0 | 0 | - | - | - | - |
| 269554 | TCCTCCTCT | chr2:182543360-182543417 | 0 | 1 | 1 | 0 | 0 | - | - | - | - |
| 269592 | AGGACGAGGAGG | chr2:182756938-182756962 | 1 | 1 | 1 | 0 | 0 | - | - | - | - |
| 269594 | TTTCTTATAGCCACATTTTTTTATTCATAGATCATCTG | chr2:182778504-182778579 | 0 | 1 | 1 | 0 | 0 | - | - | - | - |
| 270043 | TGCAGC | chr2:185803430-185803482 | 0 | 1 | 1 | 0 | 0 | - | - | - | - |
| 271954 | ATATATATACACATATACACACACA | chr2:196605358-196605493 | 0 | 1 | 1 | 0 | 0 | - | - | - | - |
| 272663 | AATGAACAGCTGGCTCAGATG | chr2:201436428-201436470 | 0 | 1 | 1 | 0 | 0 | - | - | - | - |
| 272831 | CCACCTTCTGAAAATGAATCTGCAGGAATATTTTTAATTATTTGA | chr2:202358637-202358817 | 0 | 0 | 1 | 0 | 0 | - | - | - | - |
| 273259 | GGGGGTGGTGGAGGA | chr2:204305962-204306053 | 0 | 1 | 1 | 0 | 0 | - | - | - | - |
| 274254 | GGAGGTGGAGATGGA | chr2:210685277-210685370 | 0 | 1 | 1 | 0 | 0 | - | - | - | - |
| 275247 | GGGATGCAATGACCACATTACACCCTGAAAAGTAAACAGCCAGAGAACAAATAAATATGCCTTCAT | chr2:216931217-216931348 | 0 | 1 | 1 | 0 | 0 | - | - | - | - |
| 275378 | GCTGCCGCCGCGCTGCC | chr2:217498262-217498562 | 0 | 0 | 1 | 0 | 0 | - | - | - | - |
| 275711 | CCAGCCCGA | chr2:219247730-219247756 | 0 | 1 | 1 | 0 | 0 | - | - | - | - |
| 275746 | TCAAAGCGGTGCTTCTTAGGGGCCTCTGTGGGTGAGGAGTTTCCTGCAGGAGGGACTGGG | chr2:219508173-219508353 | 0 | 0 | 1 | 0 | 0 | - | - | - | - |
| 275816 | TCCTTCTCATCCATCTCCTCC | chr2:219868811-219868957 | 0 | 0 | 1 | 0 | 0 | - | - | - | - |
| 275907 | CCAGCCCCTGAGCCC | chr2:220354470-220354512 | 0 | 1 | 1 | 0 | 0 | - | - | - | - |
| 275918 | AGGAGGAGGA | chr2:220473032-220473150 | 0 | 1 | 1 | 0 | 0 | - | - | - | - |
| 275921 | GGGGAGATGGGGTGAGTGAGGGGGGAGATGGGGTGAGTGAGG | chr2:220477936-220478391 | 0 | 0 | 1 | 0 | 0 | - | - | - | - |
| 275925 | GAGGAAGAG | chr2:220494053-220494089 | 0 | 1 | 1 | 0 | 0 | - | - | - | - |
| 275930 | CCAGGCCTGTCCATCCTCACGGGGGCTGTCTGAGGGTCAGGCAGATCTGTGTCACCTCCT | chr2:220505027-220505218 | 0 | 0 | 1 | 0 | 0 | - | - | - | - |
| 276357 | GAGAGAAAGAGAAGAAAA | chr2:223169044-223169140 | 0 | 1 | 1 | 0 | 0 | - | - | - | - |
| 277292 | GGTGCTCCTGCT | chr2:228029471-228029520 | 0 | 1 | 1 | 0 | 0 | - | - | - | - |
| 277888 | AGAGAAAGCTTTAAGAAAAGAGGTA | chr2:231331047-231331097 | 0 | 1 | 1 | 0 | 0 | - | - | - | - |
| 277893 | GAAGATGAA | chr2:231380292-231380355 | 0 | 1 | 1 | 0 | 0 | - | - | - | - |
| 277999 | CCACCTCACAGCAGCCTAGCCCTGAATCCACACCACAGCATGCCTAGTCCTTGAAA | chr2:231861024-231861187 | 0 | 0 | 1 | 0 | 0 | - | - | - | - |
| 278010 | GGGCGGCG | chr2:231902477-231902581 | 0 | 1 | 1 | 0 | 0 | - | - | - | - |
| 278091 | TCATCATCT | chr2:232325405-232325492 | 0 | 1 | 1 | 0 | 0 | - | - | - | - |
| 278092 | CATCATCCT | chr2:232326250-232326403 | 0 | 0 | 1 | 0 | 0 | - | - | - | - |
| 278172 | GAGGAAGAAGGTGGAG | chr2:232576647-232576693 | 0 | 1 | 1 | 0 | 0 | - | - | - | - |
| 278405 | CAGCAGCAGCAGCCGCCACAGCAG | chr2:233712209-233712281 | 0 | 1 | 1 | 0 | 0 | - | - | - | - |
| 279206 | GCGGGGGCCGGGGCCGGGGCGCGGG | chr2:237145977-237146554 | 0 | 0 | 1 | 0 | 0 | - | - | - | - |
| 279223 | TTTCTTTTTTGCCTTTTTCCC | chr2:237233303-237233365 | 0 | 1 | 1 | 0 | 0 | - | - | - | - |
| 279250 | CTTCTTTGCCTTTCTTTCTCTTT | chr2:237289234-237289276 | 0 | 1 | 1 | 0 | 0 | - | - | - | - |
| 279505 | ATCAGGTACCGACTTGTACTG | chr2:238243234-238243276 | 0 | 1 | 1 | 0 | 0 | - | - | - | - |
| 279506 | GTCACAGGCTTTGTTGTGGTG | chr2:238245049-238245130 | 0 | 1 | 1 | 0 | 0 | - | - | - | - |
| 279560 | GGTGAGTGGGGGGACAGTGGTGAGTGGGGGACAGT | chr2:238451301-238453885 | 0 | 0 | 1 | 0 | 0 | - | - | - | - |
| 279619 | AGAAAAAGAAAAACAACA | chr2:238672052-238672105 | 0 | 1 | 1 | 0 | 0 | - | - | - | - |
| 279725 | GGTGAGTGCCGGCCGCGCGGGAGGCCG | chr2:239072639-239072719 | 0 | 1 | 1 | 0 | 0 | - | - | - | - |
| 279763 | GGCCCTGCAGCAGGAGCAGAGGTGAGGGGTAGTAATGGGGAGGG | chr2:239306299-239307100 | 0 | 0 | 1 | 0 | 0 | - | - | - | - |
| 280075 | CTCCCTCCCTCTGCCCGGC | chr2:240097864-240098122 | 0 | 0 | 1 | 0 | 0 | - | - | - | - |
| 280410 | ACGATCAGCTTCAAGGAGGGA | chr2:240912967-240913030 | 1 | 1 | 1 | 0 | 0 | - | - | - | - |
| 280421 | CCACCCCG | chr2:240964583-240964673 | 0 | 1 | 1 | 0 | 0 | - | - | - | - |
| 280426 | GTGGATGAAGAGGC | chr2:240981346-240982393 | 0 | 0 | 1 | 0 | 0 | - | - | - | - |
| 280629 | ACGCCTGTGTGTGCGTGTTA | chr2:241403957-241404043 | 0 | 1 | 1 | 0 | 0 | - | - | - | - |
| 280646 | CCCCTCACCCAGGGCCACCCCAACCTCCCGCCCCCCCTCACCAGGGCCACCCAGCCCTCACACCCCTGCCACCCAGGGCCACCCCACCACCCTCAAA | chr2:241446752-241447036 | 0 | 0 | 1 | 0 | 0 | - | - | - | - |
| 280745 | GGGCAGGACCCCTGGCAGCAACCTCGCCCTGCAGGCAGGCCCTACCGAATGGTCCCGGCCAGGAGGGGGTTGA | chr2:241657271-241657494 | 0 | 0 | 1 | 0 | 0 | - | - | - | - |
| 280770 | GGGTGAGGGAGGGGGACACAGGCAGGGTAGGGGCAGAGAGAGGCTCACACCTGGTG | chr2:241679610-241679720 | 0 | 1 | 1 | 0 | 0 | - | - | - | - |
| 280888 | GCCAAGCAGGGTACATGGGATACCAGTGCCAGGCAGGTGAGAGGGCCGGGGG | chr2:241991849-241992329 | 0 | 0 | 1 | 0 | 0 | - | - | - | - |
| 280903 | CCTCGTCGTCGTCCTCAG | chr2:242035420-242035597 | 0 | 0 | 1 | 0 | 0 | - | - | - | - |
| 280909 | ACTACGCTAATCACGCTACCAGTCATTCTCACCTGAA | chr2:242036551-242036662 | 0 | 1 | 1 | 0 | 0 | - | - | - | - |
| 280939 | CCAAACCTTCTGCACCGTTCACATGCCCACAGCTTCCT | chr2:242140604-242140718 | 0 | 1 | 1 | 0 | 0 | - | - | - | - |
| 281046 | GGCGGATGGGTGAGCCTCTGAGCGCCTGTGGGGGTGGGAGAGCTGGGGTGCGAGGGTGCAGAGGTACGGGAGGGAGT | chr2:242509694-242510545 | 0 | 0 | 1 | 0 | 0 | - | - | - | - |
| 281095 | GCCGCGGCGCACCCACCC | chr2:242626036-242626070 | 0 | 1 | 1 | 0 | 0 | - | - | - | - |
| 281145 | CACCATAAGTCCTGCCCC | chr2:242738565-242738601 | 0 | 1 | 1 | 0 | 0 | - | - | - | - |
| 281273 | GCACTGCCCTCCGTGGGGACGTCTGCACTCACAGTGTCCTCG | chr2:242945463-242946582 | 0 | 0 | 1 | 0 | 0 | - | - | - | - |
| 281394 | CTGAGACCACTACTCCCGAGACTACTATGCCACCAT | chr20:76924-77029 | 0 | 1 | 1 | 0 | 0 | - | - | - | - |
| 281492 | CGCCGCCCGCC | chr20:590688-590755 | 0 | 1 | 1 | 0 | 0 | - | - | - | - |
| 281499 | CCCGCCGCCCCCCGCGCC | chr20:644782-644892 | 0 | 1 | 1 | 0 | 0 | - | - | - | - |
| 281809 | TTCTCCCCTGAGTGTGTCCTCTGGTGTCTGATGAGGATTGACTTCTGACTAAAGCCTCGCCCACACTCCCTGCAAACATAAGGC | chr20:2463798-2464889 | 0 | 0 | 1 | 0 | 0 | - | - | - | - |
| 281982 | AGGCTGGGCCCCTCCTGCCCGCCAGCCTCCCCAGCCCGCCCACTCTCCACCCCT | chr20:3208593-3208918 | 0 | 0 | 1 | 0 | 0 | - | - | - | - |
| 281984 | CCCATGCAGCCCCTCACCTC | chr20:3210132-3210172 | 0 | 1 | 1 | 0 | 0 | - | - | - | - |
| 282034 | GGGCTGGGAGGCCG | chr20:3451863-3451890 | 0 | 1 | 1 | 0 | 0 | - | - | - | - |
| 282093 | CATCGTCCTCTTCCT | chr20:3765524-3765587 | 0 | 1 | 1 | 0 | 0 | - | - | - | - |
| 282094 | CCTCCTCCTCCTCTTCCT | chr20:3765776-3765914 | 0 | 1 | 1 | 0 | 0 | - | - | - | - |
| 282097 | CCCGGCGCCGCCGCCGCCGCCCCGGGG | chr20:3767130-3767294 | 0 | 0 | 1 | 0 | 0 | - | - | - | - |
| 282264 | GGTGGTGGCTGGGGGCAGCCTCAT | chr20:4680025-4680145 | 0 | 1 | 1 | 0 | 0 | - | - | - | - |
| 283705 | TCATCTTCATCCTCCTCT | chr20:13756690-13756815 | 0 | 1 | 1 | 0 | 0 | - | - | - | - |
| 284176 | AAAGAAAAGAAA | chr20:16717968-16718003 | 0 | 1 | 1 | 0 | 0 | - | - | - | - |
| 284392 | AACCAGAATATTCAGA | chr20:17970716-17970748 | 1 | 1 | 1 | 0 | 0 | - | - | - | - |
| 284478 | ACACCAGAGGACACACTCAGGGGAGAAGCCCATTGTGTGCAGGGAGTGTGGGCGAGGCTTCAGCCAGAAGTCAAACCTCATCAT | chr20:18296271-18297363 | 0 | 0 | 1 | 1 | 40 | 21 | 0 | 20 | 20 |
| 285030 | CCCCGGCCA | chr20:21686580-21686609 | 0 | 1 | 1 | 0 | 0 | - | - | - | - |
| 285898 | TCGCCCACACTCCTTGCACACAAAAGGCTTCTCTCCTGAGTGTGTCCTCTGGTGCTGAGGAGGTATGACTTATTGGTAAAGCC | chr20:25656438-25657362 | 0 | 0 | 1 | 1 | 40 | 10 | 0 | 20 | 20 |
| 286584 | GTGTGTGGCTGCGCT | chr20:31669346-31669390 | 0 | 1 | 1 | 0 | 0 | - | - | - | - |
| 286722 | CGGCGGGGCGGGGCGCGGCCTAGACGG | chr20:32077846-32078074 | 0 | 0 | 1 | 0 | 0 | - | - | - | - |
| 286756 | GGGCCGCGGCGCACTGCGGTGT | chr20:32273827-32273952 | 0 | 1 | 1 | 0 | 0 | - | - | - | - |
| 286787 | CCTCCACCTCCT | chr20:32341019-32341099 | 0 | 1 | 1 | 0 | 0 | - | - | - | - |
| 286833 | GGCGGT | chr20:32664868-32664931 | 0 | 1 | 1 | 0 | 0 | - | - | - | - |
| 287008 | CCCCGCGGGCCGCCCCTGC | chr20:33297061-33297099 | 0 | 1 | 1 | 0 | 0 | - | - | - | - |
| 287013 | GTGGTGGCTGTGGCTGAGGCA | chr20:33331010-33331075 | 0 | 1 | 1 | 0 | 0 | - | - | - | - |
| 287014 | TGTTGCTGC | chr20:33345699-33345771 | 0 | 1 | 1 | 0 | 0 | - | - | - | - |
| 287032 | CTCCCCCTCCCCAGTTTC | chr20:33451069-33451124 | 0 | 1 | 1 | 0 | 0 | - | - | - | - |
| 287132 | GGGGCGGCGGCGGCGGAGGCG | chr20:33814446-33814593 | 0 | 0 | 1 | 0 | 0 | - | - | - | - |
| 287215 | GGGCCAGGGCCG | chr20:34240734-34240770 | 0 | 1 | 1 | 0 | 0 | - | - | - | - |
| 287216 | TCCTGCACTAGGCAT | chr20:34241141-34241324 | 0 | 0 | 1 | 0 | 0 | - | - | - | - |
| 287292 | AAGAAA | chr20:34501235-34501265 | 0 | 1 | 1 | 0 | 0 | - | - | - | - |
| 287418 | GGCGGCGCGACGGAAGGAGGAGC | chr20:35234337-35234382 | 0 | 1 | 1 | 0 | 0 | - | - | - | - |
| 287813 | CCATGCCACTCACTCA | chr20:36776345-36776376 | 0 | 1 | 1 | 0 | 0 | - | - | - | - |
| 288416 | ATAAACACAAAG | chr20:39690039-39690092 | 0 | 1 | 1 | 0 | 0 | - | - | - | - |
| 288456 | CCACCCTCCACT | chr20:39984608-39984644 | 0 | 1 | 1 | 0 | 0 | - | - | - | - |
| 288463 | GTTTTCCTCCTC | chr20:40049643-40049679 | 0 | 1 | 1 | 0 | 0 | - | - | - | - |
| 289086 | GGACAAGATCCAGTTAAA | chr20:43804548-43804638 | 0 | 1 | 1 | 0 | 0 | - | - | - | - |
| 289114 | CGGCTGGTGCTG | chr20:43940917-43940952 | 0 | 1 | 1 | 0 | 0 | - | - | - | - |
| 289217 | CGAGGACGA | chr20:44463015-44463051 | 0 | 1 | 1 | 0 | 0 | - | - | - | - |
| 289240 | GCCCCACAGGTCCCCCCACAGGTCCACCCCTCAGCAGC | chr20:44641965-44642074 | 0 | 1 | 1 | 0 | 0 | - | - | - | - |
| 289273 | GCCCGCGCCCCC | chr20:44803474-44803549 | 0 | 1 | 1 | 0 | 0 | - | - | - | - |
| 289291 | GCCCCGCCCCTG | chr20:44856090-44856149 | 0 | 1 | 1 | 0 | 0 | - | - | - | - |
| 289323 | AGGTTTTCCCACATTCATTACATTCATATGGTCTCTCTCCTGTGTGAGTTCTCTGATGGTGACTCAAAGGCTGACTTCTGCAGA | chr20:45130068-45131325 | 0 | 0 | 1 | 0 | 0 | - | - | - | - |
| 289373 | CCCTGGGCCTGGCTGGTT | chr20:45353946-45353999 | 0 | 1 | 1 | 0 | 0 | - | - | - | - |
| 289576 | GCAGCA | chr20:46279814-46279903 | 0 | 1 | 1 | 0 | 0 | - | - | - | - |
| 290003 | CCAGGGGAGGCTGCACCAGGT | chr20:48166683-48166723 | 0 | 1 | 1 | 0 | 0 | - | - | - | - |
| 290227 | GGCCCAGCTCTCGATGTCCCCTACTGCCC | chr20:49226031-49226117 | 0 | 1 | 1 | 0 | 0 | - | - | - | - |
| 290449 | ATAGCCACAGGCACATGTGCAGAGGGAGCCAGCTGCCCACCCACCTACATGGT | chr20:50230120-50230224 | 0 | 1 | 1 | 0 | 0 | - | - | - | - |
| 292112 | CGAGACCGAAAGCGAGAC | chr20:57415487-57415594 | 0 | 1 | 1 | 0 | 0 | - | - | - | - |
| 292114 | GCAGCCCCAGCCGATCCCGACTCCGGG | chr20:57429508-57429937 | 0 | 0 | 1 | 0 | 0 | - | - | - | - |
| 292148 | GGCCCCGCCCTTCCTCCA | chr20:57556203-57556318 | 0 | 1 | 1 | 0 | 0 | - | - | - | - |
| 292150 | TCCTCACCCGCGGGACCTT | chr20:57572575-57572671 | 0 | 1 | 1 | 0 | 0 | - | - | - | - |
| 292191 | GAGACTGTGGCTGGCCCTGGCGAG | chr20:57876553-57876620 | 0 | 1 | 1 | 0 | 0 | - | - | - | - |
| 292313 | CCGGCGCCGCCCCGCGGCC | chr20:58152515-58152635 | 0 | 1 | 1 | 0 | 0 | - | - | - | - |
| 293301 | GGCGGGCGCGGGGGGCGGCGGGGGGCGAGGGCGGCGGCGGGCGC | chr20:60640032-60640652 | 0 | 0 | 1 | 0 | 0 | - | - | - | - |
| 293329 | TTCTTTTCGTTTTC | chr20:60711922-60711963 | 0 | 1 | 1 | 0 | 0 | - | - | - | - |
| 293345 | CCAGCAGCAGCTACCCCAG | chr20:60747804-60747862 | 0 | 1 | 1 | 0 | 0 | - | - | - | - |
| 293357 | GCCGCGCGCCCCGCCCGCC | chr20:60794942-60795074 | 0 | 1 | 1 | 0 | 0 | - | - | - | - |
| 293436 | GGCTCCAGCCCCCCGAGGAACCCCCACACCCCAACACTCCCTCCAGGGCACACTCACA | chr20:60910374-60911396 | 0 | 0 | 1 | 0 | 0 | - | - | - | - |
| 293445 | GGGGCCTCACCTGAAC | chr20:60926717-60926765 | 0 | 1 | 1 | 0 | 0 | - | - | - | - |
| 293446 | AGCCCCGCTCCGCACTGCCCCTCCCCGGCCCACCTCTCCGTTCTCC | chr20:60927170-60927310 | 0 | 1 | 1 | 0 | 0 | - | - | - | - |
| 293483 | TGTCCTGGGCTGATAAGGCCCCAAGTAATCCTGACCCCCT | chr20:60981815-60981986 | 0 | 0 | 1 | 0 | 0 | - | - | - | - |
| 293484 | CGGCGGGTGCCGGGGGCC | chr20:60982262-60982297 | 0 | 1 | 1 | 0 | 0 | - | - | - | - |
| 293485 | AGGCGGCTGTGGGTGGGG | chr20:60988475-60988511 | 1 | 1 | 1 | 0 | 0 | - | - | - | - |
| 293706 | GTCTCTGAGCCCACGTCTCTGTGCCTCAGGTGCAGTGG | chr20:61389398-61389626 | 0 | 0 | 1 | 0 | 0 | - | - | - | - |
| 293732 | AAGAGGAGATGA | chr20:61430341-61430378 | 0 | 1 | 1 | 0 | 0 | - | - | - | - |
| 293733 | GAGGAGGAC | chr20:61436241-61436316 | 0 | 1 | 1 | 0 | 0 | - | - | - | - |
| 293738 | GAGCCCATCGGAGACCCCAGGCCCCCGCCCGGCAGGACCTGCAGGGGACGAGCCAGCCGA | chr20:61444514-61444934 | 0 | 0 | 1 | 1 | 22 | 22 | 0 | 5 | 5 |
| 293740 | CCGCCCGCCCGCGACG | chr20:61448362-61448455 | 0 | 1 | 1 | 0 | 0 | - | - | - | - |
| 293751 | CTCCCGGAGAGCCTGGGC | chr20:61471938-61472010 | 0 | 1 | 1 | 0 | 0 | - | - | - | - |
| 293756 | TAGTCACCCAGTCCACAGAAGTA | chr20:61483975-61484615 | 0 | 0 | 1 | 0 | 0 | - | - | - | - |
| 294009 | TGTAGAGGACTCACTTGT | chr20:61987294-61987345 | 0 | 1 | 1 | 0 | 0 | - | - | - | - |
| 294020 | GCAGCAGCAGCGGCG | chr20:61992465-61992495 | 0 | 1 | 1 | 0 | 0 | - | - | - | - |
| 294149 | CCTCCTCCAGAAAGCCCTCCCTGACTCACAAGCACCAGACACTCACCACCTCAGCCA | chr20:62191728-62191842 | 0 | 1 | 1 | 0 | 0 | - | - | - | - |
| 294151 | CCCCAGCCGCTCCCGTTG | chr20:62200416-62200522 | 0 | 1 | 1 | 0 | 0 | - | - | - | - |
| 294212 | GCCCGCTCCGAGCTCCGCCCCAGCCCCGCCCCCGCCCGTGCCCCGCCCGCTCCGCGCTAGCCCCGCCCCCGCCCCGGCCCCT | chr20:62273174-62273780 | 0 | 0 | 1 | 0 | 0 | - | - | - | - |
| 294242 | GAGGGCAGCCCTGGTTCCCCAGCAGGGCTGGGGGCCTTACAGTCCTATAAGGTAGGGGCCACCTCCAGGAGGCAGGTG | chr20:62316899-62317055 | 0 | 0 | 1 | 0 | 0 | - | - | - | - |
| 294281 | CCTGGGGTGCGGCGGGG | chr20:62373577-62373629 | 0 | 1 | 1 | 0 | 0 | - | - | - | - |
| 294390 | GACCTGGGACGAGCCCCCATACCTTTTCTCACCACTGTTCCCC | chr20:62596151-62597515 | 0 | 0 | 1 | 0 | 0 | - | - | - | - |
| 294391 | ATGGGTTTGGTGACAGGCACGGCCTTGGTGACCGGCACAGACCTGCTGACTGTG | chr20:62597700-62598041 | 0 | 0 | 1 | 0 | 0 | - | - | - | - |
| 294434 | GTGCCCCGACTCCGGTAAGGGG | chr20:62659908-62659996 | 0 | 1 | 1 | 0 | 0 | - | - | - | - |
| 294440 | GCGGCGAGGCGGGCGCGGCCGGC | chr20:62680715-62681078 | 0 | 0 | 1 | 0 | 0 | - | - | - | - |
| 294553 | GAGGAG | chr20:62839323-62839467 | 0 | 0 | 1 | 0 | 0 | - | - | - | - |
| 295024 | ACTCCTACCGCTCCGGCCGCCATCTTACCACTCCAGCCGCC | chr21:11098674-11098796 | 0 | 1 | 1 | 0 | 0 | - | - | - | - |
| 296680 | CTTTTTTTT | chr21:22881119-22881171 | 0 | 1 | 1 | 0 | 0 | - | - | - | - |
| 297564 | CTTCTTCCACCTCAGCCA | chr21:27394302-27394355 | 0 | 1 | 1 | 0 | 0 | - | - | - | - |
| 298380 | TGGATCCACAGCCCAGGGAGCAGCAGCTAC | chr21:31797857-31797950 | 0 | 1 | 1 | 0 | 0 | - | - | - | - |
| 298399 | CAGCCATATCTATAGCCTCCACAGCCA | chr21:31914024-31914134 | 0 | 1 | 1 | 0 | 0 | - | - | - | - |
| 298415 | TGGCTATGGGTGCTG | chr21:31964823-31965078 | 0 | 0 | 1 | 0 | 0 | - | - | - | - |
| 298422 | CCATAGCCACAGCCCAGGCCT | chr21:31986119-31986185 | 0 | 1 | 1 | 0 | 0 | - | - | - | - |
| 298423 | GTGGCTATGGATGTGGTTATC | chr21:31988825-31988885 | 0 | 1 | 1 | 0 | 0 | - | - | - | - |
| 298456 | CAGCCAGAGCCGTATCCACAGCCATAGCCA | chr21:32119320-32119496 | 0 | 0 | 1 | 0 | 0 | - | - | - | - |
| 298479 | CTGGTTGGCAGACAGTAGAGATGCCTCCCA | chr21:32253413-32253503 | 0 | 1 | 1 | 0 | 0 | - | - | - | - |
| 298666 | GGCTGCTGCTGTGATGGTGGA | chr21:33044216-33044326 | 0 | 1 | 1 | 0 | 0 | - | - | - | - |
| 298717 | CCTGGGGGAGCCGGCGGCG | chr21:33246013-33246121 | 0 | 1 | 1 | 0 | 0 | - | - | - | - |
| 298968 | CCGCCGCCGCAGCCGCGGCTG | chr21:34399840-34399882 | 0 | 1 | 1 | 0 | 0 | - | - | - | - |
| 298972 | CCTCCTCCTCCTCCTCCA | chr21:34442679-34442751 | 0 | 1 | 1 | 0 | 0 | - | - | - | - |
| 299079 | GAGTTGCCAGGGCCCCCTGCGACACCAGTGCCT | chr21:34922680-34923074 | 0 | 0 | 1 | 0 | 0 | - | - | - | - |
| 299081 | GTTGCCGGGGCAGCCTGAGGCAACGACAGCGCTGGA | chr21:34923141-34923582 | 0 | 0 | 1 | 0 | 0 | - | - | - | - |
| 299085 | AGCACCATGGACTCCCAGATGTTAGCAACC | chr21:34923691-34924231 | 0 | 0 | 1 | 1 | 40 | 40 | 0 | 18 | 20 |
| 299089 | GATCCCTATAGGTTAGCTCAG | chr21:34924270-34924524 | 0 | 0 | 1 | 0 | 0 | - | - | - | - |
| 299094 | ATGATGTCAGCTTACGAACGCTCT | chr21:34924561-34924900 | 0 | 0 | 1 | 0 | 0 | - | - | - | - |
| 299097 | GAGTCTTCGGCTGTGACTGTCCTG | chr21:34925593-34925738 | 0 | 0 | 1 | 0 | 0 | - | - | - | - |
| 299099 | CCCCCAGCCGCCGCAGCCGCA | chr21:34927391-34927537 | 0 | 0 | 1 | 0 | 0 | - | - | - | - |
| 299102 | ATTGTATGTTTTTCTTGAATAGGTATTGAGAAATGGAAGCCCTTACCAGACCCA | chr21:34948648-34948754 | 0 | 1 | 1 | 0 | 0 | - | - | - | - |
| 299272 | CGCCTCCGC | chr21:35987244-35987280 | 0 | 1 | 1 | 0 | 0 | - | - | - | - |
| 299285 | GGCGGGGGACAGCGTAGACGCGGAGGGCCCGCTGGGGGACAGCGTAGAAGCGGAAGGCCC | chr21:36042151-36042576 | 0 | 0 | 1 | 0 | 0 | - | - | - | - |
| 299874 | CCATCA | chr21:38884359-38884407 | 0 | 1 | 1 | 0 | 0 | - | - | - | - |
| 300260 | AAAATACCATTATAAAATCAAC | chr21:40585353-40585415 | 0 | 1 | 1 | 0 | 0 | - | - | - | - |
| 300682 | TGAGGGTGTCCAGGGTGAGGAG | chr21:42550991-42551501 | 0 | 0 | 1 | 0 | 0 | - | - | - | - |
| 300723 | TCGGTGAGAATGGGGGAGCCCGCCTGTGC | chr21:42812949-42813094 | 0 | 0 | 1 | 0 | 0 | - | - | - | - |
| 300947 | CCAGGGGAGCCCCAG | chr21:43531263-43531518 | 0 | 0 | 1 | 0 | 0 | - | - | - | - |
| 300959 | GCTTCATTAACAACAGGTAGGGCTCAAGAGTGCAGGCACCCCCATCCAGCAATGCCCAGG | chr21:43547336-43547569 | 0 | 0 | 1 | 0 | 0 | - | - | - | - |
| 300970 | GGAGGTGCAGGCTGACAGGAAGGTGGGTGCGGAGTGGGGTG | chr21:43557729-43557933 | 0 | 0 | 1 | 0 | 0 | - | - | - | - |
| 301128 | CCCACACCCTCTGCCCCTCCACCCACAGCCCGGGGATGC | chr21:43897059-43897435 | 0 | 0 | 1 | 0 | 0 | - | - | - | - |
| 301304 | CCACGTCCCCCACCTA | chr21:44283484-44283584 | 0 | 1 | 1 | 0 | 0 | - | - | - | - |
| 301363 | ACCTGTTTGAGCTGCCTGTAGGTGACCGCGC | chr21:44477725-44478283 | 0 | 0 | 1 | 1 | 40 | 40 | 0 | 20 | 20 |
| 301523 | CTCCCACCCCGGACCCTCCGTGCCTGCCAGCTTGATGTCCCTG | chr21:44841365-44841537 | 0 | 0 | 1 | 0 | 0 | - | - | - | - |
| 301645 | GCGCGGGGCGGG | chr21:45196323-45196359 | 1 | 1 | 1 | 0 | 0 | - | - | - | - |
| 301725 | GGGGTGAGCAGGGGACCCGGGGAGGGCC | chr21:45387993-45388405 | 0 | 0 | 1 | 0 | 0 | - | - | - | - |
| 301757 | AGAGTGCTGTGTGAGTACCAGTGGGGGAAGAGGACGCGCGGTGGGATGGGGTTGGAGATGCGTGG | chr21:45457798-45457993 | 0 | 0 | 1 | 0 | 0 | - | - | - | - |
| 301775 | GCCCAGGTCGGCCCCTTTTCCCGGGTCAGCTCCCGCGCCCCACGTCGGCCCCTTTCACCCCAAGTCAACTCCCGCC | chr21:45553782-45554016 | 0 | 0 | 1 | 0 | 0 | - | - | - | - |
| 301905 | GGCCCTGTGAGGCTCCATGCTCCCTCCCCACGG | chr21:45750578-45750644 | 1 | 1 | 1 | 0 | 0 | - | - | - | - |
| 301907 | GCAATACTTACATCTGTGAG | chr21:45757500-45757540 | 1 | 1 | 1 | 0 | 0 | - | - | - | - |
| 301908 | CCGCCCTCGTCCCGCCCCGGCTCCTCCCTCCGGCT | chr21:45758647-45759005 | 0 | 0 | 1 | 0 | 0 | - | - | - | - |
| 301932 | CCCTCACTCGGCTCCGTGCTTTGTTCAGGTGTGG | chr21:45797498-45797637 | 0 | 1 | 1 | 0 | 0 | - | - | - | - |
| 302080 | CAGCAGAAGGACTTG | chr21:45970748-45970853 | 0 | 1 | 1 | 0 | 0 | - | - | - | - |
| 302082 | CACAGCAGACGGGCA | chr21:45970995-45971055 | 0 | 1 | 1 | 0 | 0 | - | - | - | - |
| 302084 | GCAGGTGGAGGCATGGGCACACA | chr21:45978046-45978148 | 0 | 1 | 1 | 0 | 0 | - | - | - | - |
| 302093 | GCCTGTCTGCTGCAA | chr21:45994450-45994546 | 0 | 1 | 1 | 0 | 0 | - | - | - | - |
| 302102 | GCAGCAAGCTGGCTGGCAGCTAGACTGCTGGCAGCATGAAGAGGAAGCCCCAGAGCAGACGGGCACACAGCACACAGTGCACGCAGGCAGACGGAGCAC | chr21:46011486-46012127 | 0 | 0 | 1 | 0 | 0 | - | - | - | - |
| 302111 | CTGCTGTGTGCCCGT | chr21:46021216-46021308 | 0 | 1 | 1 | 0 | 0 | - | - | - | - |
| 302112 | CTGCTGTGTGCCTGT | chr21:46021327-46021386 | 0 | 1 | 1 | 0 | 0 | - | - | - | - |
| 302113 | CTGCTGTGTGCCCAT | chr21:46032508-46032584 | 0 | 1 | 1 | 0 | 0 | - | - | - | - |
| 302114 | CCTGCTGTGTCCCTGTCCTCCT | chr21:46032675-46032810 | 0 | 1 | 1 | 0 | 0 | - | - | - | - |
| 302122 | GCCTGTCTGCTGTAA | chr21:46047639-46047750 | 0 | 1 | 1 | 0 | 0 | - | - | - | - |
| 302127 | CTCACTCACACA | chr21:46057262-46057335 | 0 | 1 | 1 | 0 | 0 | - | - | - | - |
| 302129 | CTGCTGTGTGCCCGT | chr21:46057612-46057689 | 0 | 1 | 1 | 0 | 0 | - | - | - | - |
| 302136 | CTGCCAGCCCTCCGTGTGCATGCCCGTGAGCTGCACGCCCATCATATACGTGACTCCCTC | chr21:46077982-46078229 | 0 | 0 | 1 | 0 | 0 | - | - | - | - |
| 302138 | CAGAGGACTGGCAGGACGGAGCCGCACACACAACAGGCCTGCAGCTCACAGGCACACACA | chr21:46086433-46086734 | 0 | 0 | 1 | 0 | 0 | - | - | - | - |
| 302144 | GGCACGCACACAGAGGACTGGCAGCACGGAGCCACACACACGACGGGCCTGAAGCTCACG | chr21:46101809-46101992 | 0 | 0 | 1 | 0 | 0 | - | - | - | - |
| 302147 | AGCACCCAGACACTCACTCACTCCCTCCTCCTGCCCATCC | chr21:46116892-46117135 | 0 | 0 | 1 | 0 | 0 | - | - | - | - |
| 302150 | CTGCTGTGTGCCCGT | chr21:46117565-46117662 | 0 | 1 | 1 | 0 | 0 | - | - | - | - |
| 302188 | CTCACTGACAAGCCCTGGAAAGGAAAAGCAGTGGCCATTAGT | chr21:46229019-46229145 | 0 | 1 | 1 | 0 | 0 | - | - | - | - |
| 302242 | CCCCTCAGAGTGCTGGGATGGGGACCCTGGCTCCTTCTGGCTGTCCCCAGGAG | chr21:46313170-46313324 | 0 | 0 | 1 | 0 | 0 | - | - | - | - |
| 302511 | CTGCGGGGGTCGCGGGGGTC | chr21:46825202-46825455 | 0 | 0 | 1 | 0 | 0 | - | - | - | - |
| 302583 | AGGGCCCCC | chr21:46900006-46900052 | 0 | 1 | 1 | 0 | 0 | - | - | - | - |
| 302611 | CCCCCAGGACCTCCAGGG | chr21:46916425-46916461 | 0 | 1 | 1 | 0 | 0 | - | - | - | - |
| 302625 | GGCCCCCCA | chr21:46924416-46924461 | 0 | 1 | 1 | 0 | 0 | - | - | - | - |
| 302626 | CCCCCTGGG | chr21:46925297-46925345 | 0 | 1 | 1 | 0 | 0 | - | - | - | - |
| 302664 | CCACGGGGCAGGGGGAGGGAGCGGGAGCCTCCGGGGGAAGGAT | chr21:46950926-46951323 | 0 | 0 | 1 | 0 | 0 | - | - | - | - |
| 302668 | GAAGCTGCTCCCCGCCCACCCACAGGCGGCCGCCCGGCACCCCGGCGCCCACGTGCCTATTCCA | chr21:46957303-46957692 | 0 | 0 | 1 | 0 | 0 | - | - | - | - |
| 302891 | CCCAGATCTGCGTAGGTGCGCGCGGGGCCGCCCGGGCAGT | chr21:47422609-47422890 | 0 | 0 | 1 | 0 | 0 | - | - | - | - |
| 302986 | CCCAGGTGCCAGGGGTCGGGGGCCGGGGGCTCTGGGCATTTGGGGGGCAGTTGGGACCAGTA | chr21:47531500-47531806 | 0 | 0 | 1 | 0 | 0 | - | - | - | - |
| 303036 | CGCCCTCCCCTCCCCGTGCCCTCCCCCCAACAA | chr21:47565632-47565734 | 0 | 1 | 1 | 0 | 0 | - | - | - | - |
| 303103 | AGTCAGTGACCACCCACCAGAACAGCGTGGGATGTTCAC | chr21:47754366-47754678 | 0 | 0 | 1 | 0 | 0 | - | - | - | - |
| 303142 | CGGCAGCAAGGTGTGGGGAGCGGGGAAGGCACGAGGCCCACCCGGGAGAGGCTGGACACG | chr21:47832896-47833316 | 0 | 0 | 1 | 0 | 0 | - | - | - | - |
| 303184 | TCTCCCCTGCACCTGTGCGTCTGGCCCTCTTCACGTCCTCCTGGCCTGCTGTCTGCC | chr21:48071743-48071857 | 0 | 1 | 1 | 0 | 0 | - | - | - | - |
| 303596 | AGGAGGAGGTGGCCGCTGGAGGAGG | chr22:17601629-17601701 | 0 | 1 | 1 | 0 | 0 | - | - | - | - |
| 303729 | CTGTCCCCCGCCAGCGAGAAGAAGCCCATGCCGCCGTCTGAGGGCAAGTCTAGA | chr22:18210114-18210222 | 0 | 1 | 1 | 0 | 0 | - | - | - | - |
| 303749 | TCCTCCTCCTCGTCATAGTCCTCC | chr22:18314633-18314706 | 0 | 1 | 1 | 0 | 0 | - | - | - | - |
| 303865 | CATCGCCAACGAGGACGCCGCCCACGG | chr22:18736889-18737740 | 0 | 0 | 1 | 0 | 0 | - | - | - | - |
| 304131 | CCACTGACCATGCCA | chr22:19978147-19978177 | 0 | 1 | 1 | 0 | 0 | - | - | - | - |
| 304284 | GTCCTCGTTGGCGATGCCGTGGGCGGCATCCTCGTTAGCGATGCCCTGGGCGGC | chr22:20640677-20641001 | 0 | 0 | 1 | 0 | 0 | - | - | - | - |
| 304342 | GCACCAGCGCATCCACACCGGCGAGAAGCCCTTCAAGTGCAGCGAGTGCGGGAAGGCCTTCAGCTGCCACTCGTCCCTCATCGT | chr22:20760201-20761128 | 0 | 0 | 1 | 0 | 0 | - | - | - | - |
| 304353 | GCAGCAGGCAGACGAGCAGCGACGA | chr22:20783851-20783922 | 0 | 1 | 1 | 0 | 0 | - | - | - | - |
| 304384 | CAGCAGCAGTTCCAGG | chr22:20918840-20918947 | 0 | 1 | 1 | 0 | 0 | - | - | - | - |
| 304385 | CAGCCACCAATGCAG | chr22:20920861-20920945 | 0 | 1 | 1 | 0 | 0 | - | - | - | - |
| 304425 | CCGCCT | chr22:21212960-21213018 | 0 | 1 | 1 | 0 | 0 | - | - | - | - |
| 304453 | GGAGGAGGTGAGGGGCATGGGGAGCCAGGGCGCAGGT | chr22:21343964-21344113 | 0 | 0 | 1 | 0 | 0 | - | - | - | - |
| 304611 | GATGAAGACCAGGATGAGGACAAG | chr22:21991293-21991341 | 0 | 1 | 1 | 0 | 0 | - | - | - | - |
| 305122 | GTAGGGCTTCTCACCAGTGTGGATCCGCTGGTGCTCAATGAGGGAGGAGCTCTGGCTGAAGGCCTTCCCACACTTCATCGCATTT | chr22:24086235-24086911 | 0 | 0 | 1 | 0 | 0 | - | - | - | - |
| 305271 | GCCCAGATGACCCCCTG | chr22:24837398-24837466 | 0 | 1 | 1 | 0 | 0 | - | - | - | - |
| 305369 | AGACAGGAGGAAAATTGCATTGAAGGCCAACAGGAGCCAGCCTCCGAGGAGCATCACAGCTGAGACCTGCAAGGAAG | chr22:25334188-25334342 | 0 | 0 | 1 | 0 | 0 | - | - | - | - |
| 305610 | CACAGCGGACCTGGAGAACATG | chr22:26342155-26342198 | 0 | 1 | 1 | 0 | 0 | - | - | - | - |
| 305751 | GGAGAGAGGCGGCGCCCCGGG | chr22:26879941-26880004 | 0 | 1 | 1 | 0 | 0 | - | - | - | - |
| 306108 | GGCGGGGGCTGCTGCTGAGGCGGCT | chr22:28195443-28195520 | 0 | 1 | 1 | 0 | 0 | - | - | - | - |
| 306110 | GCTGCTGCTGCTGCTGGG | chr22:28195606-28195663 | 0 | 1 | 1 | 0 | 0 | - | - | - | - |
| 306234 | TCCTCAGGTTCTTGG | chr22:29130449-29130493 | 0 | 1 | 1 | 0 | 0 | - | - | - | - |
| 306329 | CAGCAGAACACCTATGGGCAACAAAGCAGCTATGGA | chr22:29682957-29683029 | 0 | 1 | 1 | 0 | 0 | - | - | - | - |
| 306364 | AAGTGACTGAAG | chr22:29885022-29885135 | 0 | 1 | 1 | 0 | 0 | - | - | - | - |
| 306366 | GAAGCCAAGTCCCCAGAGAAGGAAGAAGCAAAATCACCAGCC | chr22:29885171-29885747 | 0 | 0 | 1 | 0 | 0 | - | - | - | - |
| 306443 | CTCCCACCTGTCT | chr22:30197962-30197988 | 1 | 1 | 1 | 0 | 0 | - | - | - | - |
| 306546 | GGGCTGAGTCCTGG | chr22:30688419-30688513 | 0 | 1 | 1 | 0 | 0 | - | - | - | - |
| 306565 | GCAGGTGCAGCAGTTGGAGGA | chr22:30768118-30768181 | 0 | 1 | 1 | 0 | 0 | - | - | - | - |
| 306566 | CAGCCCTGCACATCCCCACCTCGG | chr22:30772476-30772597 | 0 | 1 | 1 | 0 | 0 | - | - | - | - |
| 306568 | CGGAGGCGGCGG | chr22:30783242-30783318 | 0 | 1 | 1 | 0 | 0 | - | - | - | - |
| 306992 | TCCGATGTCATGAAGTCTTCAAGAGAGACAGATAGGCTTTCACTGAGA | chr22:32546309-32546453 | 0 | 0 | 1 | 0 | 0 | - | - | - | - |
| 307880 | CCCAGCCCCACCCTTGG | chr22:36556911-36556962 | 0 | 1 | 1 | 0 | 0 | - | - | - | - |
| 307889 | GCTCCTCCTCCA | chr22:36681753-36681777 | 1 | 1 | 1 | 0 | 0 | - | - | - | - |
| 307898 | GCCCCTGCCCGCCA | chr22:36694899-36694970 | 0 | 1 | 1 | 0 | 0 | - | - | - | - |
| 307943 | CTTCTTCCTCCT | chr22:36907549-36907597 | 0 | 1 | 1 | 0 | 0 | - | - | - | - |
| 308075 | GGAGGTGGAACAGGT | chr22:37456903-37456964 | 0 | 1 | 1 | 0 | 0 | - | - | - | - |
| 308119 | CTCCTCCCCATCCTC | chr22:37602762-37602807 | 0 | 1 | 1 | 0 | 0 | - | - | - | - |
| 308170 | GCCCCCGCCGCT | chr22:37769501-37769538 | 0 | 1 | 1 | 0 | 0 | - | - | - | - |
| 308204 | GCCCTGGTACCTGCTGCAGGCCCTCCTGACCACCCCCCAGCCTGTGCCCAGAAGCCCCA | chr22:37905612-37906265 | 0 | 0 | 1 | 0 | 0 | - | - | - | - |
| 308206 | CTCCTT | chr22:37906308-37906345 | 0 | 1 | 1 | 0 | 0 | - | - | - | - |
| 308219 | CCAGCCCCTGCTGCAAACCCC | chr22:37964323-37964491 | 0 | 0 | 1 | 0 | 0 | - | - | - | - |
| 308237 | CCCCAGCTCCAGCTCCGG | chr22:38046662-38046716 | 0 | 1 | 1 | 0 | 0 | - | - | - | - |
| 308239 | CCAGCCTCCCCCAGC | chr22:38051499-38051559 | 0 | 1 | 1 | 0 | 0 | - | - | - | - |
| 308243 | CGAGGGGCTGCGCGC | chr22:38055133-38055223 | 0 | 1 | 1 | 0 | 0 | - | - | - | - |
| 308264 | CACCCAAGAGGACACCTCCAGGGCCTCATC | chr22:38119414-38119594 | 0 | 0 | 1 | 0 | 0 | - | - | - | - |
| 308267 | CCAGAGCCTCCTCTCCCAACAGAACCATCCAACAAGACAACCCCAGAACATCCTGTGCCCGACGGGACAATC | chr22:38120394-38121266 | 0 | 0 | 1 | 0 | 0 | - | - | - | - |
| 308271 | GGCCGAGAGGCGCGGCGGCGGGC | chr22:38142287-38142387 | 0 | 1 | 1 | 0 | 0 | - | - | - | - |
| 308285 | CAAGAAGGCAGCCAAGCC | chr22:38201892-38202012 | 0 | 1 | 1 | 0 | 0 | - | - | - | - |
| 308334 | CGGGGGTCATGGGAGTCA | chr22:38483149-38483221 | 0 | 1 | 1 | 0 | 0 | - | - | - | - |
| 308337 | GCCCACCCGCCGCTTCCCG | chr22:38494023-38494081 | 0 | 1 | 1 | 0 | 0 | - | - | - | - |
| 308382 | GCCCACCGCCACCCACCCGGC | chr22:38699094-38699156 | 0 | 1 | 1 | 0 | 0 | - | - | - | - |
| 308747 | GGGCCGCGGGGGCGC | chr22:40082064-40082109 | 0 | 1 | 1 | 0 | 0 | - | - | - | - |
| 309073 | GGGCCGCGCGGA | chr22:41633915-41633951 | 0 | 1 | 1 | 0 | 0 | - | - | - | - |
| 309075 | CTCTTCTTCCTCCTCCTCCTC | chr22:41650380-41650504 | 0 | 1 | 1 | 0 | 0 | - | - | - | - |
| 309100 | CAGGTGAGGGGCAGGCGGTG | chr22:41745302-41745461 | 0 | 0 | 1 | 0 | 0 | - | - | - | - |
| 309118 | CTGCTGGCCACACGCCCCA | chr22:41832713-41832770 | 0 | 1 | 1 | 0 | 0 | - | - | - | - |
| 309218 | AGCAGCAGCGGCAGCAGTGGCAGGGGC | chr22:42262929-42263006 | 0 | 1 | 1 | 0 | 0 | - | - | - | - |
| 309231 | CCAGGACCAGCG | chr22:42322185-42322260 | 0 | 1 | 1 | 0 | 0 | - | - | - | - |
| 309246 | TATGGAGCCCCACCTGCAGGA | chr22:42422777-42423112 | 0 | 0 | 1 | 0 | 0 | - | - | - | - |
| 309492 | TGCTGCTGGCGCTGCTGC | chr22:43525234-43525303 | 0 | 1 | 1 | 0 | 0 | - | - | - | - |
| 310154 | TGGAGGGGTGAAGGGGACAGAGATGGAGGAG | chr22:45309855-45310077 | 0 | 0 | 1 | 0 | 0 | - | - | - | - |
| 310293 | GGAGGCCTTTGGCCGGCGGCAGAACAAGCCCATGGAGTCCCTGGACTTGAAGGACAAGACCAAGGTATGGGCTGGGGGTGCG | chr22:45723880-45724290 | 0 | 0 | 1 | 1 | 20 | 9 | 0 | 0 | 0 |
| 310523 | CTGATGGTTCAAATTGAAGTTTCATTA | chr22:46759084-46759138 | 1 | 1 | 1 | 0 | 0 | - | - | - | - |
| 310589 | CCGCAGAGCCGGGCACCGGCT | chr22:46932681-46932764 | 0 | 1 | 1 | 0 | 0 | - | - | - | - |
| 312205 | TGCTCGGGGTGCTGACCTTTGTGGGGAGGGCACAGTGA | chr22:50017694-50018115 | 0 | 0 | 1 | 0 | 0 | - | - | - | - |
| 312423 | CGGGGGCGGGGCGCGGAGGTGGGTGGGGCCTAGGCCTGGC | chr22:50438013-50438274 | 0 | 0 | 1 | 0 | 0 | - | - | - | - |
| 312459 | CCGCAGGCCTCTCACCTCCCCGGCTGGGCACCCCTGTGGGCCACTCACCTCCCCAGTGCCCCCTCCC | chr22:50502047-50502518 | 0 | 0 | 1 | 0 | 0 | - | - | - | - |
| 312496 | GCCCCGCCCGCGCCCCCC | chr22:50609098-50609172 | 0 | 1 | 1 | 0 | 0 | - | - | - | - |
| 312498 | GCCCCCGCCCCGCCGCCC | chr22:50616615-50616668 | 0 | 1 | 1 | 0 | 0 | - | - | - | - |
| 312505 | ACGGAGCCCTCGTTTTTCAGGGTGTGTGGTACACACAGCGGCCACGGGTCCCTTTCCAGGGTACGTGGTCCGTGGAGCGGCC | chr22:50631780-50632030 | 0 | 0 | 1 | 0 | 0 | - | - | - | - |
| 312507 | GCGGGGCGGGGCTTCCGG | chr22:50639409-50639465 | 0 | 1 | 1 | 0 | 0 | - | - | - | - |
| 312511 | AGCCCGGCTGTCACTCCAG | chr22:50655362-50655416 | 0 | 1 | 1 | 0 | 0 | - | - | - | - |
| 312513 | CATGGGTGTTCCACCGTGGCCGGGTGGGAGCCACATCTGACACAGTCTCCCCCAACCTGATGCTGGCGTCGGACACGTGTC | chr22:50658979-50659708 | 0 | 0 | 1 | 1 | 40 | 11 | 0 | 19 | 20 |
| 312534 | CACAGGGTCCACACAGGCCCTACCCAGAGCCCCCAACTCACGGGTCCACACAGGCCCTACCAGGAGCCCCCAACT | chr22:50693475-50693622 | 0 | 0 | 1 | 0 | 0 | - | - | - | - |
| 312540 | CCCCCGCACGCGCCCT | chr22:50706206-50706253 | 0 | 1 | 1 | 0 | 0 | - | - | - | - |
| 312548 | GGCCGGCACCCCTCCCTCCGCACCTGAGCCTGCCTGTCACCAGCCGGCACCCCTCCCTCCGCACCTGAGCCTGCCTGTCACC | chr22:50723588-50724248 | 0 | 0 | 1 | 0 | 0 | - | - | - | - |
| 312561 | CCCATGCCCCCCAGC | chr22:50751962-50752067 | 0 | 1 | 1 | 0 | 0 | - | - | - | - |
| 312601 | CGTGAGTGCTGGTGGGC | chr22:50857407-50857440 | 0 | 1 | 1 | 0 | 0 | - | - | - | - |
| 312613 | CCCCGGCCCTCAGCCCCAGC | chr22:50913029-50913215 | 0 | 0 | 1 | 0 | 0 | - | - | - | - |
| 312627 | GCTCCACACCCCCCCCAGTGCCCGGCCTTACCCCTGCACCCCGGGCTCCACACCCCACCCGGTGCCCGGCCTTACCCCTGCACCCCGG | chr22:50942428-50942782 | 0 | 0 | 1 | 0 | 0 | - | - | - | - |
| 312630 | CCCCAAGCCCACTCCACACC | chr22:50942949-50942988 | 0 | 1 | 1 | 0 | 0 | - | - | - | - |
| 312636 | TGGAACCAGAGGGCATGTCCCCCA | chr22:50956641-50956689 | 0 | 1 | 1 | 0 | 0 | - | - | - | - |
| 312729 | CCCACC | chr22:51183393-51183490 | 0 | 1 | 1 | 0 | 0 | - | - | - | - |
| 314316 | ACCCAGAAACCTCCCTGGCTCAACAAGCCTCCCAGCATGACCCTGTGGCCTTCCCCTCCACCCAGAGCACCAGCAGCAGTGGTGCAG | chr3:10044442-10044964 | 0 | 0 | 1 | 0 | 0 | - | - | - | - |
| 314715 | CTTCCTCCT | chr3:12228952-12228996 | 0 | 1 | 1 | 0 | 0 | - | - | - | - |
| 314825 | GAGGATGAG | chr3:12790155-12790218 | 0 | 1 | 1 | 0 | 0 | - | - | - | - |
| 314968 | AGGGCAGAAGCTGGGGCA | chr3:13612821-13612857 | 1 | 1 | 1 | 0 | 0 | - | - | - | - |
| 315106 | TCCAGAAGCATCCTCCAGCAGC | chr3:14105778-14106363 | 0 | 0 | 1 | 0 | 0 | - | - | - | - |
| 315320 | TTCTGCCCTGTCTCCTATAGAAATACAAAGATTATCAAAAGTGAGTATTGACAA | chr3:15297796-15297904 | 0 | 1 | 1 | 0 | 0 | - | - | - | - |
| 317307 | AACAACAGCAGC | chr3:29476284-29476320 | 0 | 1 | 1 | 0 | 0 | - | - | - | - |
| 317672 | AAATGTGAAGAATGTGGCAAGGTTTTTAATCACAATCAAACCTTGCAAGACATCATAGAATTCATACTGGAGAGAAACCTTAC | chr3:32031345-32032521 | 0 | 0 | 1 | 1 | 40 | 14 | 0 | 20 | 20 |
| 318400 | TCTTCC | chr3:36897784-36897825 | 0 | 1 | 1 | 0 | 0 | - | - | - | - |
| 318680 | CTCAGGATCTTC | chr3:38764963-38764999 | 0 | 1 | 1 | 0 | 0 | - | - | - | - |
| 318732 | CCAGGTGGTAGAGCA | chr3:39141856-39141916 | 0 | 1 | 1 | 0 | 0 | - | - | - | - |
| 318801 | AGCCACGGTCCCCTCCGAGGTCTGAGCGTC | chr3:39544105-39544329 | 0 | 0 | 1 | 0 | 0 | - | - | - | - |
| 318944 | GCCCTATGAATGTAAGGAGTGTGGGAAAGCCTTCAGTTATAATTCATAACTGATTCAGCATCAGAGAATCCACACTGGGGAGAA | chr3:40528858-40529446 | 0 | 0 | 1 | 1 | 40 | 17 | 0 | 19 | 20 |
| 318952 | AATGTAAAGAGTGTGGAAAAGGTTTAAGTTCAGCACAGCCTTCATTCAGCATCAGAGAATCCACACTGGGGAAAAGCCCTATG | chr3:40557842-40558345 | 0 | 0 | 1 | 0 | 0 | - | - | - | - |
| 319261 | TTCAAAAGCAATAGAATAATCT | chr3:42635982-42636026 | 0 | 1 | 1 | 0 | 0 | - | - | - | - |
| 319270 | GAAGAGGAGGAAGAGGAAGAGGGTGGCAGTGCACGGGA | chr3:42700711-42700936 | 0 | 0 | 1 | 0 | 0 | - | - | - | - |
| 319552 | TGAAGGCTTTCCCACATTCATTACATTTATAAGGTTTCTCCCCAGTGTGGGTCTCTGATGGTCGAATAAGATTTTACTCCGAC | chr3:44541175-44541847 | 0 | 0 | 1 | 1 | 40 | 5 | 0 | 20 | 20 |
| 319573 | GGGGAGAAACCCTATGAATGCAATGAGTGTGGAAAGGCCTATACGCACAGCTCCCGATCTCACTCAACACCAGAGAACTCCATAAT | chr3:44611904-44612828 | 0 | 0 | 1 | 1 | 40 | 10 | 0 | 20 | 20 |
| 319584 | CAGGGGAGAAACCTTATAAATGTAATGAATGTGGGAAAGCTTCTCTCAGAATGCTTACCTCATTACCATCAGAGGCTCCACA | chr3:44683883-44684539 | 0 | 0 | 1 | 0 | 0 | - | - | - | - |
| 319585 | TCAGAGTGCAAACCTCGTTGTGCATCAGAGAATCCACACTGGACAGAAACCCTTATGAATGCTCATAAATGTGGGAAAGCCTTCAC | chr3:44700550-44701390 | 0 | 0 | 1 | 1 | 40 | 13 | 0 | 20 | 20 |
| 319594 | TCATTCCTTACTCAACATCAAAGAATTCACACTGGAGAGAAACCATACACATGTGAGCAATGTGGGAAAACATTTAGATCGTAGA | chr3:44762810-44763985 | 0 | 0 | 1 | 0 | 0 | - | - | - | - |
| 319600 | GAATTCATACTGGAGAGAAACCTTATAAATGTAATGAATGTGGAAAAGCCTTCAATCAGAGCACATCCCTTATTCAACATCAGA | chr3:44776121-44776789 | 0 | 0 | 1 | 0 | 0 | - | - | - | - |
| 319681 | CGGCGGTGGCGGCGG | chr3:45267008-45267067 | 0 | 1 | 1 | 0 | 0 | - | - | - | - |
| 319929 | GCAGCTGCA | chr3:47043574-47043643 | 0 | 1 | 1 | 0 | 0 | - | - | - | - |
| 320005 | GCCCCATCCTCA | chr3:47452143-47452180 | 0 | 1 | 1 | 0 | 0 | - | - | - | - |
| 320006 | CAGCCCCTCTGCCCACCTC | chr3:47458758-47458818 | 0 | 1 | 1 | 0 | 0 | - | - | - | - |
| 320093 | TCTTGTTTTCTTTGGGTGGTCCCATGTCCTTGGAAGGAGCCAAGTCCATTTTTATAGGAGATGCCCTCTCTGTTTCTT | chr3:47958106-47958262 | 0 | 0 | 1 | 0 | 0 | - | - | - | - |
| 320252 | GGGGGCCCTCTGTGGGAGCA | chr3:48605882-48605979 | 0 | 1 | 1 | 0 | 0 | - | - | - | - |
| 320260 | CATGCCCACACC | chr3:48668005-48668041 | 0 | 1 | 1 | 0 | 0 | - | - | - | - |
| 320274 | GTGGGATCTGGGAAGATGGAA | chr3:48719561-48719623 | 0 | 1 | 1 | 0 | 0 | - | - | - | - |
| 320405 | CCTTGGCCTTGACCCGTGCTGCCTTGGCTTTGG | chr3:49200578-49200780 | 0 | 0 | 1 | 0 | 0 | - | - | - | - |
| 320496 | CGGCCC | chr3:49592091-49592133 | 0 | 1 | 1 | 0 | 0 | - | - | - | - |
| 320497 | GGCCCC | chr3:49592218-49592254 | 0 | 1 | 1 | 0 | 0 | - | - | - | - |
| 320509 | GCCCCCTGCCAGCCAAGGCCA | chr3:49688222-49688303 | 0 | 1 | 1 | 0 | 0 | - | - | - | - |
| 320510 | CAGCAGCTGCAG | chr3:49694354-49694402 | 0 | 1 | 1 | 0 | 0 | - | - | - | - |
| 320518 | CAGCGGCGG | chr3:49755642-49755686 | 0 | 1 | 1 | 0 | 0 | - | - | - | - |
| 320535 | TCCAGTGGCTCT | chr3:49848802-49848850 | 0 | 1 | 1 | 0 | 0 | - | - | - | - |
| 320548 | GTGGCTGGGGTGGCACTCCCATCA | chr3:49896943-49897111 | 0 | 0 | 1 | 0 | 0 | - | - | - | - |
| 320807 | TCATCATCATCT | chr3:51440782-51440831 | 0 | 1 | 1 | 0 | 0 | - | - | - | - |
| 320925 | CCTTGG | chr3:52027853-52027884 | 0 | 1 | 1 | 0 | 0 | - | - | - | - |
| 320997 | CGTCATCCTCAT | chr3:52438493-52438529 | 0 | 1 | 1 | 0 | 0 | - | - | - | - |
| 321009 | GAGGAGGAGGAA | chr3:52521416-52521563 | 0 | 0 | 1 | 0 | 0 | - | - | - | - |
| 321015 | CTGCACTCAGGAGATTCCAG | chr3:52549018-52549055 | 0 | 1 | 1 | 0 | 0 | - | - | - | - |
| 321016 | GCCCGCC | chr3:52567753-52567837 | 0 | 1 | 1 | 0 | 0 | - | - | - | - |
| 321203 | CTTCTCGCCGCCCTGCTCCTTCTC | chr3:53916047-53916116 | 0 | 1 | 1 | 0 | 0 | - | - | - | - |
| 321412 | GATGGTGGTGGT | chr3:55733455-55733503 | 0 | 1 | 1 | 0 | 0 | - | - | - | - |
| 321583 | TGGGGTAAGCAGGGGTAAGC | chr3:56591277-56591317 | 0 | 1 | 1 | 0 | 0 | - | - | - | - |
| 322526 | TTGGGTAGGTTCACA | chr3:62467490-62467534 | 0 | 1 | 1 | 0 | 0 | - | - | - | - |
| 322724 | CTCTTCCTCCTC | chr3:63981645-63981681 | 0 | 1 | 1 | 0 | 0 | - | - | - | - |
| 323377 | CATCATCATCTCCTTCGTCGTCAT | chr3:69169018-69169090 | 0 | 1 | 1 | 0 | 0 | - | - | - | - |
| 324328 | AAAGGTTTTTCCACATTCATTACATTCATAGGGTTTTTCCCCTGTGTGAGTTCTCTGATGTATAGTGAGGATTGACTTACGGCG | chr3:75786136-75787982 | 0 | 0 | 1 | 0 | 0 | - | - | - | - |
| 327609 | CTCTCACTCTCGCTCTCACTCTTG | chr3:97467364-97467439 | 0 | 1 | 1 | 0 | 0 | - | - | - | - |
| 327632 | ACCAAAAGGATGCTGAAGGGGATATTGGAAAGACTGAAGATGATACCCGTTACATTAGAATGGAAAATACTT | chr3:97594977-97595474 | 0 | 0 | 1 | 0 | 0 | - | - | - | - |
| 327928 | AGGCCAGCCAGGACCTTCCAGGACCCCC | chr3:99514403-99514457 | 0 | 1 | 1 | 0 | 0 | - | - | - | - |
| 329826 | TCCTTCCTCACCTTGCC | chr3:112358145-112358177 | 0 | 1 | 1 | 0 | 0 | - | - | - | - |
| 330792 | AAGACCTTCTGTACAGATTGACAGTGGATCATCCGTACCATCTGACCA | chr3:118865695-118865935 | 0 | 0 | 1 | 0 | 0 | - | - | - | - |
| 331173 | CTCAGG | chr3:121351293-121351335 | 0 | 1 | 1 | 0 | 0 | - | - | - | - |
| 331504 | AGCCGCCGCCGCCG | chr3:123166963-123167060 | 0 | 1 | 1 | 0 | 0 | - | - | - | - |
| 331543 | TTCAGGGTCTCAGCAGGCTTGGCGTTGCCCATGGGC | chr3:123419135-123419279 | 0 | 0 | 1 | 0 | 0 | - | - | - | - |
| 331746 | AGGTGTAGGAATTGTGGAGGAACTATGTGTACTAATTATGGGGGGAGC | chr3:124646589-124646730 | 0 | 0 | 1 | 0 | 0 | - | - | - | - |
| 331767 | GAAGAGGAGGAGGAG | chr3:124732416-124732446 | 1 | 1 | 1 | 0 | 0 | - | - | - | - |
| 331770 | GCGGCAGCAACAGCA | chr3:124774661-124774706 | 0 | 1 | 1 | 0 | 0 | - | - | - | - |
| 331790 | TGACGAAGGACACCAGGA | chr3:124906208-124906244 | 0 | 1 | 1 | 0 | 0 | - | - | - | - |
| 332034 | AGAGCTGGCTCCCCTTTCCAG | chr3:126132886-126132927 | 0 | 1 | 1 | 0 | 0 | - | - | - | - |
| 332045 | GCGCGGGGCTCGCGCCGAGCGG | chr3:126194599-126194703 | 0 | 1 | 1 | 0 | 0 | - | - | - | - |
| 332057 | CCTCCCTCCT | chr3:126218867-126218908 | 0 | 1 | 1 | 0 | 0 | - | - | - | - |
| 332384 | AGAGGA | chr3:127379353-127379431 | 0 | 1 | 1 | 0 | 0 | - | - | - | - |
| 332684 | AGGGACCGGAGG | chr3:128720426-128720499 | 0 | 1 | 1 | 0 | 0 | - | - | - | - |
| 332694 | GAGGAGGAGGTGGCAG | chr3:128751711-128751756 | 0 | 1 | 1 | 0 | 0 | - | - | - | - |
| 332728 | TCCTCCTCTTCC | chr3:128852950-128852989 | 0 | 1 | 1 | 0 | 0 | - | - | - | - |
| 333601 | GCCCTGGGGCTCCTG | chr3:134090032-134090133 | 0 | 1 | 1 | 0 | 0 | - | - | - | - |
| 333640 | TGTCCACCAGGTGC | chr3:134329061-134329102 | 0 | 1 | 1 | 0 | 0 | - | - | - | - |
| 334122 | GAGGAAGATCTTCCAAG | chr3:137781767-137781799 | 0 | 1 | 1 | 0 | 0 | - | - | - | - |
| 334301 | GCGGCTGCAGCCGCA | chr3:138664863-138664909 | 0 | 1 | 1 | 0 | 0 | - | - | - | - |
| 334801 | TTTCCACATACACACAGTAT | chr3:141917596-141917655 | 0 | 1 | 1 | 0 | 0 | - | - | - | - |
| 335517 | ACTGGCTGATTATAC | chr3:146246479-146246523 | 0 | 1 | 1 | 0 | 0 | - | - | - | - |
| 336240 | CCACCAACTCCTCCT | chr3:150421501-150421621 | 0 | 1 | 1 | 0 | 0 | - | - | - | - |
| 336352 | CAGCAGCCC | chr3:151134102-151134207 | 0 | 1 | 1 | 0 | 0 | - | - | - | - |
| 337327 | CGTCGTGGTCGT | chr3:156877772-156877808 | 0 | 1 | 1 | 0 | 0 | - | - | - | - |
| 337453 | CTCCGCCGCCTGCCTCCGCCTC | chr3:157823554-157823753 | 0 | 0 | 1 | 0 | 0 | - | - | - | - |
| 337884 | AAGGGGGAG | chr3:161220971-161221096 | 0 | 1 | 1 | 0 | 0 | - | - | - | - |
| 339047 | TCTTCTTCCTCC | chr3:167728102-167728142 | 0 | 1 | 1 | 0 | 0 | - | - | - | - |
| 339315 | AAGTCAGACAGTGAGAAA | chr3:169710566-169710638 | 0 | 1 | 1 | 0 | 0 | - | - | - | - |
| 341300 | CATGAACAGCTCGCACACCTA | chr3:181430774-181430816 | 0 | 1 | 1 | 0 | 0 | - | - | - | - |
| 341509 | TTATCCCATCTTAACAAC | chr3:182583408-182583443 | 0 | 1 | 1 | 0 | 0 | - | - | - | - |
| 341687 | AGGAGGAGGAGGCGGCAGCAC | chr3:183493760-183493844 | 0 | 1 | 1 | 0 | 0 | - | - | - | - |
| 341796 | GGCGGGCGCGG | chr3:183979073-183979131 | 0 | 1 | 1 | 0 | 0 | - | - | - | - |
| 341802 | CAAAGACAAGGAGGAAAA | chr3:184024198-184024252 | 0 | 1 | 1 | 0 | 0 | - | - | - | - |
| 341805 | GGAAGAAGGAGAAGCAAGA | chr3:184039742-184039817 | 0 | 1 | 1 | 0 | 0 | - | - | - | - |
| 341812 | GCTGCTGCTCCTCGG | chr3:184098135-184098165 | 0 | 1 | 1 | 0 | 0 | - | - | - | - |
| 341861 | CCGGCGCGGCCCGGC | chr3:184279969-184280133 | 0 | 0 | 1 | 0 | 0 | - | - | - | - |
| 342267 | CATCCCCATGAACATCATACCCATGAACAG | chr3:186395141-186395322 | 0 | 0 | 1 | 0 | 0 | - | - | - | - |
| 342509 | GCACACAGCCACTGAGTGGGCCTTTCTCCAGCCCACTCTGCTCACCT | chr3:187442934-187443271 | 0 | 0 | 1 | 0 | 0 | - | - | - | - |
| 342651 | AGGTAAGAGCTGAAGTTAAAGTCATGTT | chr3:188202490-188202546 | 1 | 1 | 1 | 0 | 0 | - | - | - | - |
| 343630 | GTGTCTGGGTAACTGGGT | chr3:194080276-194080330 | 0 | 1 | 1 | 0 | 0 | - | - | - | - |
| 343972 | CCTCAGAGAGCAGCGCCTCTTCCGACGGCCCCCATCCAGTCATCACCCCGTCACGGG | chr3:195451991-195452675 | 0 | 0 | 1 | 1 | 40 | 36 | 0 | 0 | 0 |
| 344002 | TGACAGGAAGAGGGGTGGCGTGACCTGTGGATGCTGAGGAAGTGTCGGTGACAGGAAGAGGGGTGGCGTGACCTGTGGATGCTGAGGAAGTGTCGG | chr3:195505720-195515512 | 0 | 0 | 1 | 1 | 40 | 0 | 0 | 20 | 19 |
| 344004 | GTGACCTGTGGATGCTGAGGAAGTGTCG | chr3:195505787-195505982 | 0 | 0 | 1 | 0 | 0 | - | - | - | - |
| 344067 | CCCACCTCCTCA | chr3:195613818-195613855 | 0 | 1 | 1 | 0 | 0 | - | - | - | - |
| 344244 | CCTGCGGAGGGAGGAGAAACACTGAGCTAAGACGGGGTCGCAGCTGGGGAG | chr3:196051310-196051412 | 0 | 1 | 1 | 0 | 0 | - | - | - | - |
| 344581 | AAAATGGAGGCTTCTGTGATTATGGGAAGTAGGTAGG | chr3:197482677-197483047 | 0 | 0 | 1 | 1 | 12 | 12 | 0 | 3 | 3 |
| 344606 | CAGGTAAACCATAGTGGAAGCAT | chr3:197553882-197554342 | 0 | 0 | 1 | 1 | 30 | 30 | 0 | 15 | 15 |
| 344755 | AACATAAGAGAATTCATACTGGAGAGAAACCCTACAAATGTGAAGAATGTGGCAAAGCCTTTAATCGGTCCTCAACCCTGAATG | chr4:85960-87303 | 0 | 0 | 1 | 0 | 0 | - | - | - | - |
| 344794 | AAATGTGAAGAATGTGGCAAAGCCTTTAGACAGTCCACAAGCCTGAATGAACATAAGAAAATTCATACTGGAGAGAAACCCTAC | chr4:247723-248639 | 0 | 0 | 1 | 0 | 0 | - | - | - | - |
| 344801 | TCTAAAGGCTTTGCCACATTCTTCACATTTGTAGGTTTCTCTCCAGTATGAATTTTCTTATGTTTATTCAGGGTGTGGACCA | chr4:264274-266189 | 0 | 0 | 1 | 0 | 0 | - | - | - | - |
| 344824 | AACATAAGAGAATTCATACTGGAGAGAAACCCTACAAATGTGAAGAATGTGGCAAAGCCTTTAAATGGTCCTCAACCTTAATA | chr4:366788-368610 | 0 | 0 | 1 | 0 | 0 | - | - | - | - |
| 344840 | TAAAGGCTTTGCCACATTCTTCACATTTGTAGGGTTTCTCTCCAGTATGAATTCTCTTATGTGCATAAAGGTTTGAGACTGTC | chr4:435463-437984 | 0 | 0 | 1 | 0 | 0 | - | - | - | - |
| 344958 | GCCCCTCTGACCCCTGCACACACACGTGCAGCCCAGACCA | chr4:649548-649743 | 0 | 0 | 1 | 0 | 0 | - | - | - | - |
| 344961 | GTGCGGCGGGGGCAGGTCGTCCAGGGGTCACCCAGGGGTCACGGCT | chr4:651283-652277 | 0 | 0 | 1 | 0 | 0 | - | - | - | - |
| 345037 | GAGCAGGTGGGCGGGGCCCGGGGGTCGCTGCAGTGTTAGTGCTCGCCGTGGAGGCGT | chr4:738470-741554 | 0 | 0 | 1 | 0 | 0 | - | - | - | - |
| 345140 | TGCCTCCCTCCCCTCTGCGGGGGATCTGGGGCTCACGTG | chr4:886830-887195 | 0 | 0 | 1 | 0 | 0 | - | - | - | - |
| 345143 | GGGCCTGCGGGGAGCGCAGGGGTGACGCCT | chr4:887793-888238 | 0 | 0 | 1 | 0 | 0 | - | - | - | - |
| 345156 | TCCTAACCGAGCGGGACCCGCACACAGAGGCCTTGGCAGCCGCGTGTGGAGGGAGCCACTACCTTGTGGTCCCTGTGGATGATGGGCGGC | chr4:897856-898452 | 0 | 0 | 1 | 0 | 0 | - | - | - | - |
| 345202 | GCCCACCCTGGACCTGGCCCTGGGGCGGGAGAGGCCAGCCGGGCTCAGCGGGGACCAGGGAC | chr4:954970-955213 | 0 | 0 | 1 | 0 | 0 | - | - | - | - |
| 345471 | GTGCCCATGTGGAGTGCCCGCCTGCTCACAC | chr4:1388318-1389493 | 0 | 0 | 1 | 0 | 0 | - | - | - | - |
| 345640 | CAAAGCGGAGACTCCGCACGGAGCCGAGGAAGAATG | chr4:1729764-1729836 | 0 | 1 | 1 | 0 | 0 | - | - | - | - |
| 345747 | TGGGCCACCAGCCTGGCAGGGAGGGAAGGAGTCAACCTGGGAGGCCAGGACTGTGAGGCG | chr4:2077234-2077354 | 0 | 1 | 1 | 0 | 0 | - | - | - | - |
| 345806 | CTGGGATGGGCTGGAAGGAGGGGGCTGGGGAGGAAGGGAGGGGTAGACG | chr4:2332751-2332901 | 0 | 0 | 1 | 0 | 0 | - | - | - | - |
| 345886 | GCGCTCTCACCTGCT | chr4:2695404-2695467 | 0 | 1 | 1 | 0 | 0 | - | - | - | - |
| 345918 | TCCGAGGACGAGCGCAAGGTGACTGGGGG | chr4:2826439-2826497 | 0 | 1 | 1 | 0 | 0 | - | - | - | - |
| 345973 | CCGCCGCCGCCC | chr4:3076744-3076780 | 0 | 1 | 1 | 0 | 0 | - | - | - | - |
| 345996 | CTGCAGCTGCCTGGCC | chr4:3215749-3215781 | 0 | 1 | 1 | 0 | 0 | - | - | - | - |
| 346131 | CATGATGCCCTCTCGCCCCGCCTGCCCGTGATGCCCTCTCGCCCCGCCCGCCCGTCGATGCCCTCTCACCCCACCCGCC | chr4:3477855-3478087 | 0 | 0 | 1 | 0 | 0 | - | - | - | - |
| 347454 | AGGGGAGAGGCGCACCTGGCCCAGGCCTCACAACCCCCTTTCTGGTGTCG | chr4:7639906-7640054 | 0 | 0 | 1 | 0 | 0 | - | - | - | - |
| 347607 | CAGCAGCCCCCACT | chr4:8089720-8089896 | 0 | 0 | 1 | 0 | 0 | - | - | - | - |
| 347735 | AGAGGAAGAAAGTGTGCAGAATGGTGCACGCTAACATGATCCCGGCAGGTG | chr4:8358305-8358965 | 0 | 0 | 1 | 0 | 0 | - | - | - | - |
| 348824 | GCGGCTGCGGCGGAGGAG | chr4:13629147-13629200 | 0 | 1 | 1 | 0 | 0 | - | - | - | - |
| 349068 | CGCCGCCACCCCAGCCGCAGCAGCAGC | chr4:15005462-15005623 | 0 | 0 | 1 | 0 | 0 | - | - | - | - |
| 349124 | TTTTCTTTTTC | chr4:15503987-15504053 | 0 | 1 | 1 | 0 | 0 | - | - | - | - |
| 349540 | AGCGGCGGCGGC | chr4:18023308-18023344 | 0 | 1 | 1 | 0 | 0 | - | - | - | - |
| 350652 | ATGCGTTGAATGAGCAGAATGGGTTGA | chr4:24578066-24578143 | 0 | 1 | 1 | 0 | 0 | - | - | - | - |
| 350728 | GCTTCCTTCTTACACACCA | chr4:24878278-24878315 | 0 | 1 | 1 | 0 | 0 | - | - | - | - |
| 350877 | TGCTGCTGCTGCCGCG | chr4:25678152-25678225 | 0 | 1 | 1 | 0 | 0 | - | - | - | - |
| 353320 | TGTCTGCTATAACTGGTA | chr4:39206871-39206907 | 0 | 1 | 1 | 0 | 0 | - | - | - | - |
| 353819 | GCTGCCGCCGCCGCC | chr4:41747989-41748142 | 0 | 0 | 1 | 0 | 0 | - | - | - | - |
| 354279 | GTACTGGTATTTA | chr4:44691992-44692030 | 0 | 1 | 1 | 0 | 0 | - | - | - | - |
| 354870 | TCTTTGCTTTTTCTCC | chr4:47945209-47945269 | 0 | 1 | 1 | 0 | 0 | - | - | - | - |
| 355027 | CGGGAGAGCGGCCGTCG | chr4:48493196-48493229 | 0 | 1 | 1 | 0 | 0 | - | - | - | - |
| 355567 | AGAGAGAGAGACAGAGAC | chr4:54319169-54319278 | 0 | 1 | 1 | 0 | 0 | - | - | - | - |
| 356035 | GGAGGAGGGCGGCGGCT | chr4:57180654-57180783 | 0 | 1 | 1 | 0 | 0 | - | - | - | - |
| 356049 | GTACAGATAAAACAA | chr4:57314763-57314793 | 1 | 1 | 1 | 0 | 0 | - | - | - | - |
| 356060 | CCGAGAATCCCGAGAAAC | chr4:57396987-57397046 | 0 | 1 | 1 | 0 | 0 | - | - | - | - |
| 356134 | GGGGCCTGCTCACATGGAGCTGCCTGCCTCCCATGGAGACTGCTCAGACGGAGGGTGCCCAAAT | chr4:57797000-57797408 | 0 | 0 | 1 | 0 | 0 | - | - | - | - |
| 358053 | TCCTCTTCCTCCTCC | chr4:69202890-69203028 | 0 | 1 | 1 | 0 | 0 | - | - | - | - |
| 358339 | TGCAGCTGAGCCTGC | chr4:71024355-71024594 | 0 | 0 | 1 | 0 | 0 | - | - | - | - |
| 358362 | TTCCACCACCCCATCCTCCACCCTATGGTCCAGGGAGAA | chr4:71232454-71232612 | 0 | 0 | 1 | 0 | 0 | - | - | - | - |
| 358368 | CTCCTCCTCAACCCTATGGTCCAGGGATATTTCCACCAC | chr4:71255431-71255582 | 0 | 0 | 1 | 0 | 0 | - | - | - | - |
| 358382 | TTCCTCAGCTCCACCAGAGACCACAGCTGCCCCACCCACACCTTCTGCAACTACACCAGCTCCACCATC | chr4:71346934-71347429 | 0 | 0 | 1 | 0 | 0 | - | - | - | - |
| 358788 | CCGCCGCCTCCA | chr4:74124056-74124104 | 0 | 1 | 1 | 0 | 0 | - | - | - | - |
| 359144 | GCTGTTATTAAAAAATGCAAAATA | chr4:76539632-76539757 | 0 | 1 | 1 | 0 | 0 | - | - | - | - |
| 360506 | GGCGGCGGCAGAGGC | chr4:85418931-85419145 | 0 | 0 | 1 | 0 | 0 | - | - | - | - |
| 360508 | GGAGGACGACGA | chr4:85419198-85419234 | 0 | 1 | 1 | 0 | 0 | - | - | - | - |
| 360985 | CATCATCGCCAT | chr4:88414909-88414944 | 0 | 1 | 1 | 0 | 0 | - | - | - | - |
| 361006 | GACAGCAGT | chr4:88535455-88537699 | 0 | 0 | 1 | 0 | 0 | - | - | - | - |
| 361066 | CTGATGAGTCTCACCAGT | chr4:88902750-88902805 | 0 | 1 | 1 | 0 | 0 | - | - | - | - |
| 361068 | CAGCCATGAATTCCA | chr4:88903909-88903953 | 0 | 1 | 1 | 0 | 0 | - | - | - | - |
| 361086 | TCTAATAACCTATAAGAGAACATATATGTTGTGGG | chr4:89053060-89053130 | 0 | 1 | 1 | 0 | 0 | - | - | - | - |
| 361358 | TGGAGGCAC | chr4:90816598-90816643 | 0 | 1 | 1 | 0 | 0 | - | - | - | - |
| 363559 | GAGGAGGAGGAGGCG | chr4:105412510-105412556 | 0 | 1 | 1 | 0 | 0 | - | - | - | - |
| 363561 | GCCGCCCCCGCCGCC | chr4:105412557-105412646 | 0 | 1 | 1 | 0 | 0 | - | - | - | - |
| 363658 | AGCAGCCACCACAGACCCC | chr4:106196264-106196324 | 0 | 1 | 1 | 0 | 0 | - | - | - | - |
| 364218 | CCATGGGGACCAGGTGGG | chr4:109765673-109765708 | 0 | 1 | 1 | 0 | 0 | - | - | - | - |
| 364377 | GGTGGAGGCGGC | chr4:110737410-110737488 | 0 | 1 | 1 | 0 | 0 | - | - | - | - |
| 364382 | AGAGGAGGAAGAGGTGGGGGCTTC | chr4:110745137-110745185 | 0 | 1 | 1 | 0 | 0 | - | - | - | - |
| 364978 | GCAAAAACTGAAAGGCACTCTCCTGTGTCATCATCAAGTAAAACTGAGAAACACTCACCTGTATCACCCTCT | chr4:114275282-114275708 | 0 | 0 | 1 | 0 | 0 | - | - | - | - |
| 365995 | TCTGCTGCTGCT | chr4:120549753-120549801 | 0 | 1 | 1 | 0 | 0 | - | - | - | - |
| 366198 | CTGCCTGTCGTCCTCTCT | chr4:122078284-122078343 | 0 | 1 | 1 | 0 | 0 | - | - | - | - |
| 367302 | GAGGACGAGGAAGAGGAC | chr4:129012242-129012294 | 0 | 1 | 1 | 0 | 0 | - | - | - | - |
| 369157 | TGCTGC | chr4:140811057-140811176 | 0 | 1 | 1 | 0 | 0 | - | - | - | - |
| 370070 | GTGGTG | chr4:146823380-146823428 | 0 | 1 | 1 | 0 | 0 | - | - | - | - |
| 370339 | CATTGCTTTACTGTGATGCTGA | chr4:148559683-148559725 | 0 | 1 | 1 | 0 | 0 | - | - | - | - |
| 371238 | CACCTCCTCCAC | chr4:153864294-153864461 | 0 | 0 | 1 | 0 | 0 | - | - | - | - |
| 371328 | GCGGCGCGGGGCGGG | chr4:154387402-154387557 | 0 | 0 | 1 | 0 | 0 | - | - | - | - |
| 371464 | GATTGCAGGGAGCCGA | chr4:155410726-155410758 | 1 | 1 | 1 | 0 | 0 | - | - | - | - |
| 371478 | CAGAGCTCCCAGGGTTCCAGGTTCCAGTACTTCCAGGTC | chr4:155507484-155507720 | 0 | 0 | 1 | 0 | 0 | - | - | - | - |
| 371692 | CACAGCAGC | chr4:156874949-156874985 | 0 | 1 | 1 | 0 | 0 | - | - | - | - |
| 373594 | CATCATCATCATCAACTTCATCTT | chr4:167656100-167656196 | 0 | 1 | 1 | 0 | 0 | - | - | - | - |
| 374778 | TCTTCATCTTCATCCTCCTCCTCCTCA | chr4:174253234-174253316 | 0 | 1 | 1 | 0 | 0 | - | - | - | - |
| 375022 | CCCAGAGTCAACCTCAGGTGATGCCTTCCCAGAGTCAACCTCCTGTGACGCCCT | chr4:175898864-175899242 | 0 | 0 | 1 | 1 | 12 | 12 | 0 | 6 | 6 |
| 377128 | ATGGAAAATCGCAGTCACAAAGGCGAGTATGC | chr4:187171535-187171597 | 0 | 1 | 1 | 0 | 0 | - | - | - | - |
| 378237 | TCAAGGGCACGGGTACGGTGGCTCGGCCCCGCCCTCACTCACCCGCAGAGGGCACTGGGCCTGTCA | chr5:181778-181980 | 0 | 0 | 1 | 0 | 0 | - | - | - | - |
| 378424 | CTGTGAGGGAGGGGAGGGAGGTCAGGGCCGGG | chr5:492186-492599 | 0 | 0 | 1 | 0 | 0 | - | - | - | - |
| 378810 | CACGAGCACCACCACCAC | chr5:1038422-1038528 | 0 | 1 | 1 | 0 | 0 | - | - | - | - |
| 378936 | CGGGCTCGGGGCCCT | chr5:1111983-1112024 | 0 | 1 | 1 | 0 | 0 | - | - | - | - |
| 379048 | GCCCCCCTCCCCACCCATCCCACATACCCAGCCGCCCGCAGGCCCT | chr5:1213088-1213582 | 0 | 0 | 1 | 0 | 0 | - | - | - | - |
| 379053 | GCAGCCCCCGGGCGTGTGAACAGCTCTGTCCCCGGCCGTGCGT | chr5:1219275-1219620 | 0 | 0 | 1 | 0 | 0 | - | - | - | - |
| 379075 | GGACACGGACACGCGCCCAGACACGGACATGCGCCC | chr5:1246102-1246213 | 0 | 1 | 1 | 0 | 0 | - | - | - | - |
| 379159 | TGGGGGCCCTGCATGCGTCCTGGGGTAGTACACGCTCCTG | chr5:1393696-1394101 | 0 | 0 | 1 | 0 | 0 | - | - | - | - |
| 379255 | GGGGGGGTCCCTCACTCCCAGCAGGGAGGGATCTCACTCATTCCCAGCAA | chr5:1494532-1494824 | 0 | 0 | 1 | 0 | 0 | - | - | - | - |
| 379488 | CTCCTCCCGCCCTC | chr5:1879642-1879717 | 0 | 1 | 1 | 0 | 0 | - | - | - | - |
| 381072 | ATGGCCGTGTTCAACATGGTAAGCCCCAGACCACAGCCGTGTTCAACATGGTAAGCCCCACACC | chr5:7757681-7757875 | 0 | 0 | 1 | 0 | 0 | - | - | - | - |
| 381589 | GCCCGCGCCCCGGCCCCCG | chr5:10564539-10564657 | 0 | 1 | 1 | 0 | 0 | - | - | - | - |
| 381590 | CGGAGAGCGTCC | chr5:10564793-10564843 | 0 | 1 | 1 | 0 | 0 | - | - | - | - |
| 382300 | GCGGCGGCGGGGGCAGCG | chr5:14487608-14487734 | 0 | 1 | 1 | 0 | 0 | - | - | - | - |
| 382631 | TTTCTTCTTCCTCCCGTTTCTTCT | chr5:16703034-16703105 | 0 | 1 | 1 | 0 | 0 | - | - | - | - |
| 383962 | CACCAGAGGACACACACAGGGGAGAAGCCCTATGTCTGCAGGGAGTGTGGGCGGGGCTTTAGCAGGAAGTCACACCTCCTCACT | chr5:23526820-23527910 | 0 | 0 | 1 | 0 | 0 | - | - | - | - |
| 386352 | GGCCTGAAACTCCAAAGCAAAAGGGTGATAGCC | chr5:36985377-36985575 | 0 | 0 | 1 | 0 | 0 | - | - | - | - |
| 386363 | TGTATATATATA | chr5:37036435-37036482 | 0 | 1 | 1 | 0 | 0 | - | - | - | - |
| 386368 | AGATTC | chr5:37059102-37059144 | 0 | 1 | 1 | 0 | 0 | - | - | - | - |
| 386421 | GAAGAAGAGGAA | chr5:37396621-37396672 | 0 | 1 | 1 | 0 | 0 | - | - | - | - |
| 386678 | TGTGTGTATATATGTATA | chr5:38820762-38821193 | 0 | 0 | 1 | 0 | 0 | - | - | - | - |
| 387036 | CAGACCTCTCACTGC | chr5:40692189-40692230 | 0 | 1 | 1 | 0 | 0 | - | - | - | - |
| 387333 | ACTCAAGAATGG | chr5:42695022-42695046 | 1 | 1 | 1 | 0 | 0 | - | - | - | - |
| 387895 | CGCCACCGC | chr5:45695972-45696018 | 0 | 1 | 1 | 0 | 0 | - | - | - | - |
| 389669 | GGGCGGCGGCGG | chr5:59189185-59189326 | 0 | 0 | 1 | 0 | 0 | - | - | - | - |
| 389886 | CGGCGGCGGCGGCGCGGG | chr5:60628485-60628705 | 0 | 0 | 1 | 0 | 0 | - | - | - | - |
| 390647 | TCCCATTCTAGCTCAAAA | chr5:65460651-65460706 | 0 | 1 | 1 | 0 | 0 | - | - | - | - |
| 390648 | GAAAAGGAACGAGGAAAAA | chr5:65466638-65466717 | 0 | 1 | 1 | 0 | 0 | - | - | - | - |
| 391075 | TAGCCATGCCCA | chr5:68417570-68417594 | 1 | 1 | 1 | 0 | 0 | - | - | - | - |
| 391083 | CTGAGCCAGAAC | chr5:68464090-68464140 | 0 | 1 | 1 | 0 | 0 | - | - | - | - |
| 391176 | TGGCTA | chr5:68805264-68805300 | 0 | 1 | 1 | 0 | 0 | - | - | - | - |
| 391564 | AGATTTGGAAGAAACTGAAAGAGAAATATCCCCAAGGGAAAATGGCCCAGAGGAGGTGAAGCCTGTAGGTGAAATGGAGAC | chr5:70805699-70806920 | 0 | 0 | 1 | 0 | 0 | - | - | - | - |
| 391662 | AAGGAAGTGAAG | chr5:71491300-71491381 | 0 | 1 | 1 | 0 | 0 | - | - | - | - |
| 391663 | AGACTTTGCACCAAGAAAAGA | chr5:71493570-71493611 | 0 | 1 | 1 | 0 | 0 | - | - | - | - |
| 391825 | GGCCTGAGCGGCGGCGGC | chr5:72743019-72743270 | 0 | 0 | 1 | 0 | 0 | - | - | - | - |
| 391827 | CGCCGCCACCCGCGCTCGC | chr5:72743832-72744082 | 0 | 0 | 1 | 0 | 0 | - | - | - | - |
| 392010 | AAAAGTATATT | chr5:74096544-74096713 | 0 | 0 | 1 | 0 | 0 | - | - | - | - |
| 392433 | CCGCTCCAGGGCGCAGCTCGCG | chr5:76373205-76373344 | 0 | 1 | 1 | 0 | 0 | - | - | - | - |
| 392797 | CCACCTCCC | chr5:78610448-78610495 | 0 | 1 | 1 | 0 | 0 | - | - | - | - |
| 392865 | CTTCCTCTCTCTTTCTCCTCCTC | chr5:79042845-79042915 | 0 | 1 | 1 | 0 | 0 | - | - | - | - |
| 393063 | GCAGCGGCC | chr5:79950699-79950773 | 0 | 1 | 1 | 0 | 0 | - | - | - | - |
| 394197 | CTGCTGCTGGCGTAGCCGGTG | chr5:86564539-86564602 | 0 | 1 | 1 | 0 | 0 | - | - | - | - |
| 399310 | ACCAGAAAGGGGGTGAGT | chr5:121758727-121758763 | 0 | 1 | 1 | 0 | 0 | - | - | - | - |
| 400652 | AAGCACATCCACAAAT | chr5:130799689-130799736 | 0 | 1 | 1 | 0 | 0 | - | - | - | - |
| 400824 | ATCTCTTGCACATGCTCTGGTTGAGTAAGT | chr5:131976473-131976533 | 1 | 1 | 1 | 0 | 0 | - | - | - | - |
| 400825 | GAAGCAAGATGGCCTGTTGGGAGGCTACCACAGTAAACCAGGCTAGAGATGATGGTGGCGTGGACAGAAT | chr5:132016275-132016485 | 0 | 0 | 1 | 0 | 0 | - | - | - | - |
| 400846 | GACACTGGAAGCAGAAAA | chr5:132160107-132160142 | 0 | 1 | 1 | 0 | 0 | - | - | - | - |
| 401554 | TCATCCTCTTCCTCA | chr5:136314361-136314404 | 0 | 1 | 1 | 0 | 0 | - | - | - | - |
| 401761 | TACCCGTCCCCGGTTACTACCTCT | chr5:137803461-137803676 | 0 | 0 | 1 | 0 | 0 | - | - | - | - |
| 401966 | CCTACCAACCCCTCAC | chr5:138856881-138856913 | 0 | 1 | 1 | 0 | 0 | - | - | - | - |
| 402068 | CCGGGC | chr5:139228054-139228097 | 0 | 1 | 1 | 0 | 0 | - | - | - | - |
| 402091 | GGGCTGCG | chr5:139422419-139422478 | 0 | 1 | 1 | 0 | 0 | - | - | - | - |
| 402092 | TGCTGCTGCTGCTGCTGCTGCTGCTCGCTCTCGC | chr5:139422500-139422599 | 0 | 1 | 1 | 0 | 0 | - | - | - | - |
| 402103 | AGGCGGCGGGCGGAGCGGC | chr5:139493713-139493807 | 0 | 1 | 1 | 0 | 0 | - | - | - | - |
| 402169 | AAAAAAG | chr5:139903686-139903763 | 0 | 1 | 1 | 0 | 0 | - | - | - | - |
| 402170 | AGAGGATGAATGATGA | chr5:139903790-139903820 | 0 | 1 | 1 | 0 | 0 | - | - | - | - |
| 402184 | CGAGAG | chr5:140038638-140038699 | 0 | 1 | 1 | 0 | 0 | - | - | - | - |
| 402285 | CGCTCAAAGGAAT | chr5:140792747-140792773 | 1 | 1 | 1 | 0 | 0 | - | - | - | - |
| 402313 | CCAGGCAAAGGAGGAGGTGGGGGGGGAATTCCTAGCACTC | chr5:140953290-140953587 | 0 | 0 | 1 | 0 | 0 | - | - | - | - |
| 402326 | TCCTCATACACAGGC | chr5:141033922-141033982 | 0 | 1 | 1 | 0 | 0 | - | - | - | - |
| 403080 | GGAGTAAGAGTC | chr5:145609380-145609451 | 0 | 1 | 1 | 0 | 0 | - | - | - | - |
| 403081 | CCAGGTCCAGGC | chr5:145613170-145613231 | 0 | 1 | 1 | 0 | 0 | - | - | - | - |
| 403116 | GCCCAG | chr5:145838542-145838771 | 0 | 0 | 1 | 0 | 0 | - | - | - | - |
| 403329 | GTCGTCTGGCTT | chr5:147281298-147281343 | 0 | 1 | 1 | 0 | 0 | - | - | - | - |
| 403374 | AGGAGCAATACAGGAGAA | chr5:147499900-147499954 | 0 | 1 | 1 | 0 | 0 | - | - | - | - |
| 403673 | AGGAGGAAGAAG | chr5:149212921-149212994 | 0 | 1 | 1 | 0 | 0 | - | - | - | - |
| 403752 | GAGGAGGACTCAGGGAGCAGT | chr5:149758905-149758966 | 0 | 1 | 1 | 0 | 0 | - | - | - | - |
| 403754 | AAAAAAAGACAAAGA | chr5:149777917-149777961 | 0 | 1 | 1 | 0 | 0 | - | - | - | - |
| 403801 | CGCCCC | chr5:150036299-150036365 | 0 | 1 | 1 | 0 | 0 | - | - | - | - |
| 403839 | TGAATTCTCTGATGTATAATGAGGTGTGACTTCTGGCAGAAGGCTTTCCCACATTCACTACATTCATAGGGTTTTTCCCCAGTA | chr5:150275004-150276180 | 0 | 0 | 1 | 1 | 40 | 15 | 22 | 20 | 20 |
| 404010 | GAGCCTGATCCTGAACCA | chr5:151176812-151176905 | 0 | 1 | 1 | 0 | 0 | - | - | - | - |
| 404689 | ACAGTCGTTGTCGTTGGA | chr5:156479421-156479666 | 0 | 0 | 1 | 0 | 0 | - | - | - | - |
| 404795 | GGCGGGCGCGGGGCGCG | chr5:157170965-157171054 | 0 | 1 | 1 | 0 | 0 | - | - | - | - |
| 405030 | TTTTTTTTTTTC | chr5:158630629-158630653 | 1 | 1 | 1 | 0 | 0 | - | - | - | - |
| 405209 | TTCTTCTTCTTCTTT | chr5:159831507-159831553 | 0 | 1 | 1 | 0 | 0 | - | - | - | - |
| 407036 | GATGATGATGAAGAG | chr5:170819938-170819983 | 0 | 1 | 1 | 0 | 0 | - | - | - | - |
| 407347 | GATGCAGATGGAGAT | chr5:172293992-172294070 | 0 | 0 | 1 | 0 | 0 | - | - | - | - |
| 407930 | TTCATTCATTCATTTG | chr5:175112456-175112506 | 0 | 1 | 1 | 0 | 0 | - | - | - | - |
| 408027 | CATGCCCACCACGAGCCTCCT | chr5:175717206-175717373 | 0 | 0 | 1 | 0 | 0 | - | - | - | - |
| 408028 | TGCCACAGTCACCAAGAGATG | chr5:175717449-175717593 | 0 | 0 | 1 | 0 | 0 | - | - | - | - |
| 408353 | GCTCTGGGCCCTCAGCCCCCTTCCCCAGCCCCGGCCGCATACCCAGTTGATGAGCA | chr5:176894954-176895122 | 0 | 0 | 1 | 0 | 0 | - | - | - | - |
| 408394 | TTTTCTTGCTTGGGCTTCCTGG | chr5:177151160-177151224 | 0 | 1 | 1 | 0 | 0 | - | - | - | - |
| 408527 | CGGCGGGGGCTGGCACGGCGCGACCG | chr5:177631923-177631971 | 0 | 1 | 1 | 0 | 0 | - | - | - | - |
| 408537 | CCCTGGTGGCCCTGGGAGGC | chr5:177679559-177679617 | 0 | 1 | 1 | 0 | 0 | - | - | - | - |
| 408539 | CCAGGAGGGCCCCGGAGCCCCAGCAGCT | chr5:177690251-177690305 | 0 | 1 | 1 | 0 | 0 | - | - | - | - |
| 408656 | AAAAGATTTCCCACATGTATTACATTCATAGGGTTTCTCTCCAGTATGAATTCTCTGATGCTGCAATAAGAGATGAACTTTGGCC | chr5:178139118-178139705 | 0 | 0 | 1 | 0 | 0 | - | - | - | - |
| 408694 | CTTACTGTACATCAAAGAACTCATACTGGAGAAAAACCCTATAAATGTAATGAATGTGGAAAAGCCTTTAGTCAAAGCATGAAT | chr5:178358746-178359584 | 0 | 0 | 1 | 0 | 0 | - | - | - | - |
| 408704 | CACACTGGAGAGAAACCCTATAAATGTAATGAATGTGGGAAAGCCTTCAGGGTCAACTCTTCCCTTACGAACATCAGAGAATT | chr5:178392368-178393040 | 0 | 0 | 1 | 1 | 40 | 20 | 20 | 20 | 20 |
| 408723 | CTCAGCCCTAATACAACATCAGAGAATTCACACTGGAGAAAAACCATATAAATGTAAAGAATGTGGGAAAGCCTTCAGCCAAAG | chr5:178460100-178460687 | 0 | 0 | 1 | 0 | 0 | - | - | - | - |
| 408733 | ACATCAGAGAATTCATACTGGAGAGAAACCCTACAATGTAATGAATGTGAGAAAGCCTTTAGCCACAGTTCAACCCTTCTCT | chr5:178506131-178507055 | 0 | 0 | 1 | 0 | 0 | - | - | - | - |
| 408884 | GGAGCTGGAGCC | chr5:178977611-178977647 | 0 | 1 | 1 | 0 | 0 | - | - | - | - |
| 408895 | ACTTACTCTAAGTACAGTAATAACAGGCTTTACCATA | chr5:179043020-179043130 | 0 | 1 | 1 | 0 | 0 | - | - | - | - |
| 408912 | AAGGAAGAGGAAGAAGGAC | chr5:179151711-179151781 | 0 | 1 | 1 | 0 | 0 | - | - | - | - |
| 408914 | CGCCCGCCGCCACGGCCCCGG | chr5:179160342-179160429 | 0 | 1 | 1 | 0 | 0 | - | - | - | - |
| 408978 | TCCCAAGCAGCCCCCAGGCCCCACCTCGGCAGCGAAGACTCACCTTAGAGCTTTCCA | chr5:179528972-179529084 | 0 | 1 | 1 | 0 | 0 | - | - | - | - |
| 409214 | GCCTTCCCACACTCATCACACACATAGGGTTTCTCACCTGTGTGGATCCTCTTATGCACTGAGAAAGGACAGAGCTGTAACTGAAA | chr5:180276116-180276704 | 0 | 0 | 1 | 1 | 40 | 20 | 4 | 20 | 20 |
| 409215 | TGAAGGCCTTCCCACACTCATCACATTCATAGGGCTTCTCCCCAGTGTGGATCCTTTTATGGACCCTAAGCCCAGAGCTGTTAC | chr5:180277539-180278125 | 0 | 0 | 1 | 0 | 0 | - | - | - | - |
| 409688 | GCCCCGGCCTCGCCCGCC | chr6:1313632-1313708 | 0 | 1 | 1 | 0 | 0 | - | - | - | - |
| 409707 | CCTCCGCCTCCTCGTCCTCGT | chr6:1390315-1390399 | 0 | 1 | 1 | 0 | 0 | - | - | - | - |
| 409793 | GCGCGGGCG | chr6:1611788-1611853 | 0 | 1 | 1 | 0 | 0 | - | - | - | - |
| 410035 | GGAAGTTCTGTTTACATGGA | chr6:2968997-2969037 | 1 | 1 | 1 | 0 | 0 | - | - | - | - |
| 410212 | AGGAGCAGCGGCGCGAGC | chr6:3850328-3850382 | 0 | 1 | 1 | 0 | 0 | - | - | - | - |
| 410884 | TCCCGCTCCGGA | chr6:7585967-7586039 | 0 | 1 | 1 | 0 | 0 | - | - | - | - |
| 411742 | TGGATGTAGAGTCAGCTCAAAGACTCT | chr6:12719004-12719058 | 0 | 1 | 1 | 0 | 0 | - | - | - | - |
| 411743 | CCCTCCCCTCC | chr6:12749746-12749903 | 0 | 0 | 1 | 0 | 0 | - | - | - | - |
| 412313 | GCAGCTGCGGGAGGGCCT | chr6:15496730-15496787 | 0 | 1 | 1 | 0 | 0 | - | - | - | - |
| 412444 | CGCCGCCCCGCGCAGGCGC | chr6:16238860-16238933 | 0 | 1 | 1 | 0 | 0 | - | - | - | - |
| 412631 | CGCAGCCGCAGCCCGAGC | chr6:17281752-17281824 | 0 | 1 | 1 | 0 | 0 | - | - | - | - |
| 413683 | GGCGGAGGCGGAGAGGGC | chr6:22570313-22570387 | 0 | 1 | 1 | 0 | 0 | - | - | - | - |
| 414283 | CCTGGTGCAGACCAAGGGCAC | chr6:26156875-26156914 | 0 | 1 | 1 | 0 | 0 | - | - | - | - |
| 414522 | TGGAGAAAAACCTTATGAATGCAATGAATGTGGAAAAGCCTTTAGCCGAAGCACACACCTTAGTCAACATCAGAGAACTCATAC | chr6:27368544-27369216 | 0 | 0 | 1 | 1 | 40 | 23 | 0 | 20 | 20 |
| 414533 | GCTCTGGCTAAAGGTCTTTCTCACATTCATTACACTTATAAGGCTTCTCCCCAGTATGAGTATTCGTTGATGCTCAGTCAGATGAGA | chr6:27419207-27420383 | 0 | 0 | 1 | 0 | 0 | - | - | - | - |
| 414748 | GAGAATCCACACTGGGGAGAAGCCCTATCAATGTAATGAGTGTGGGAAAGCCTTCAGTCAGAGCTCAGGCCTCATTCTGCATCA | chr6:28121080-28121915 | 0 | 0 | 1 | 0 | 0 | - | - | - | - |
| 414764 | CCACAGTCTTCACACTCATAGGGCTTCTCACCAGTGTGGATTCTCTGATGAATGACAAGGGCAGAGCTCCCAATGAAGACCTTA | chr6:28213302-28213554 | 0 | 0 | 1 | 0 | 0 | - | - | - | - |
| 414766 | AAGAAGAAA | chr6:28227824-28227891 | 0 | 1 | 1 | 0 | 0 | - | - | - | - |
| 414793 | GAGAATCCACACTGGTGAGAAGCCCTATGAGTGTGAAGAATGTGGCAAAGCCTTCAGTCAGAGCTCAGACCTTATCAAGCATCA | chr6:28333443-28334025 | 0 | 0 | 1 | 0 | 0 | - | - | - | - |
| 414794 | TTCCCACACTTATCACATTTGTAGGGTCTTTCTCCAGTGTGAATTCTCTGATGTTCCGTGAAGACTTGATCCTTTGAATAAACGCC | chr6:28358471-28359056 | 0 | 0 | 1 | 0 | 0 | - | - | - | - |
| 414927 | TCTCCCCAGTGTGGATTCTTATGTGTTTGCTGAGGTCTGAACTCCCACTGAAGGCCCTTCCCACACTTCCTGCACATTCATAAGGTCG | chr6:28963457-28964049 | 0 | 0 | 1 | 0 | 0 | - | - | - | - |
| 415041 | GAGATGGGGTAAAGAGG | chr6:29693075-29693108 | 0 | 1 | 1 | 0 | 0 | - | - | - | - |
| 415117 | CCTCTTCCTCCTCATCCC | chr6:30154080-30154159 | 0 | 1 | 1 | 0 | 0 | - | - | - | - |
| 415185 | GAGGAAGAAGGAGAAG | chr6:30550176-30550221 | 0 | 1 | 1 | 0 | 0 | - | - | - | - |
| 415187 | CCAGGGCCTTCGTGGGGACGATGTCCACCACCTCCACCCATGCCACCG | chr6:30569870-30570200 | 0 | 0 | 1 | 0 | 0 | - | - | - | - |
| 415194 | GCCTCCTCCTTCTCCA | chr6:30652647-30652677 | 0 | 1 | 1 | 0 | 0 | - | - | - | - |
| 415261 | AGCAGAGCCTACAGAAAATGGAGAAAGGACCCATGCCAATGAGAAGACCACACCATCCCC | chr6:30917086-30919975 | 0 | 0 | 1 | 0 | 0 | - | - | - | - |
| 415277 | CTCCAGTGGGGCCAGCACAGCCACCAACTCTGAGTCCAGCACGAC | chr6:30954065-30955280 | 0 | 0 | 1 | 1 | 40 | 40 | 0 | 20 | 20 |
| 415296 | CACCACAGCCTCCACCACAGGCTCTGAGACAACCATAGCCTCCACCATGGCCTCTACTGCAGCCTTAACCACAGGCTCTAAGAC | chr6:30993318-30994485 | 0 | 0 | 1 | 0 | 0 | - | - | - | - |
| 415300 | ACAGCCTCTGAGACCACC | chr6:30995818-30995926 | 0 | 1 | 1 | 0 | 0 | - | - | - | - |
| 415329 | AATATTCCCCCAGCTGCCTCCTGGATACCGATT | chr6:31079277-31079409 | 0 | 1 | 1 | 0 | 0 | - | - | - | - |
| 415330 | GCTGCTGCTGCTCGAACTGAAAGCT | chr6:31084890-31084980 | 0 | 1 | 1 | 0 | 0 | - | - | - | - |
| 415428 | TCCCGACGGGACAGAGGAGCCTGGG | chr6:31605297-31605345 | 0 | 1 | 1 | 0 | 0 | - | - | - | - |
| 415429 | AGGTGGTGGGTGGTGGAGG | chr6:31610129-31610165 | 0 | 1 | 1 | 0 | 0 | - | - | - | - |
| 415480 | TCCTCCTCT | chr6:31857266-31857347 | 0 | 1 | 1 | 0 | 0 | - | - | - | - |
| 415484 | CCCCAGGCTGCCCCCCGC | chr6:31868129-31868223 | 0 | 1 | 1 | 0 | 0 | - | - | - | - |
| 415500 | TCTCGGTCTCGGTCTCGATCCCGATCCCGATCCCTGTCCCGA | chr6:31922345-31922513 | 0 | 0 | 1 | 0 | 0 | - | - | - | - |
| 415504 | GTGCGTCTGT | chr6:31931902-31931934 | 0 | 1 | 1 | 0 | 0 | - | - | - | - |
| 415533 | CAGTCCTCGCCAGTGTAGCCGGGGTCACACACGCAGCGCCCATCCTCACAGCGTCCCCCCTGGCTGCAGACCCGAGGGCAGCTCCTCATACCA | chr6:32064526-32065086 | 0 | 0 | 1 | 0 | 0 | - | - | - | - |
| 415552 | GCAGCAGGAAGAGCA | chr6:32139206-32139252 | 0 | 1 | 1 | 0 | 0 | - | - | - | - |
| 415570 | CTTCTTTACTTGGGCTTCCTGTCCTTTTGGTACACCTGACTCACT | chr6:32260979-32261564 | 0 | 0 | 1 | 1 | 40 | 40 | 0 | 20 | 20 |
| 415714 | GAGGAAGAGGAG | chr6:32945677-32945724 | 0 | 1 | 1 | 0 | 0 | - | - | - | - |
| 415762 | ACCCCTCCCCAAT | chr6:33139449-33139490 | 0 | 1 | 1 | 0 | 0 | - | - | - | - |
| 415776 | CAGCAGGGGAACCTCACCCTCTC | chr6:33247797-33248230 | 0 | 0 | 1 | 0 | 0 | - | - | - | - |
| 415781 | CCTCCTCCTCCTCCTCTT | chr6:33287880-33287953 | 0 | 1 | 1 | 0 | 0 | - | - | - | - |
| 415820 | CTGCTTCCACTGAAAGCC | chr6:33423424-33423460 | 0 | 1 | 1 | 0 | 0 | - | - | - | - |
| 415889 | CCGGGCCTCCTCCCGCAGCCGCTCCTCGCCCCGCAG | chr6:33756692-33756958 | 0 | 0 | 1 | 0 | 0 | - | - | - | - |
| 416084 | GTCAGGAGCAGGAGCCCATGT | chr6:34574427-34574469 | 1 | 1 | 1 | 0 | 0 | - | - | - | - |
| 416266 | TTCCTCTGCCTCCTC | chr6:35478734-35478796 | 0 | 1 | 1 | 0 | 0 | - | - | - | - |
| 416584 | CAGCCGCAGCCA | chr6:37138209-37138294 | 0 | 1 | 1 | 0 | 0 | - | - | - | - |
| 416864 | CCTGGTACCTGCCCTGGGCCAGCAGTGGTGAGCCCCCTCCCCGA | chr6:39025328-39025680 | 0 | 0 | 1 | 1 | 8 | 8 | 0 | 3 | 4 |
| 417351 | TATGGCTGGCCCAGATGTGGCCTTGGGTGG | chr6:42073576-42073795 | 0 | 0 | 1 | 0 | 0 | - | - | - | - |
| 417354 | GGGGGTGCAGGAGGGAGGCAGG | chr6:42074423-42074485 | 0 | 1 | 1 | 0 | 0 | - | - | - | - |
| 417534 | CCAGCC | chr6:42974196-42974250 | 0 | 1 | 1 | 0 | 0 | - | - | - | - |
| 417536 | GCCGGG | chr6:42989413-42989462 | 0 | 1 | 1 | 0 | 0 | - | - | - | - |
| 417571 | AAGGCCGAGGCCCCCAAGAC | chr6:43155711-43155773 | 0 | 1 | 1 | 0 | 0 | - | - | - | - |
| 417589 | AGGAGGAGGAGGAAG | chr6:43250672-43250795 | 0 | 1 | 1 | 0 | 0 | - | - | - | - |
| 417591 | CCCGGCCCGGGGCGTCCC | chr6:43252944-43252996 | 0 | 1 | 1 | 0 | 0 | - | - | - | - |
| 417605 | CTTAGTCTCAGGGGCCCC | chr6:43306965-43307001 | 1 | 1 | 1 | 0 | 0 | - | - | - | - |
| 417606 | GGTGGTGGA | chr6:43307371-43307417 | 0 | 1 | 1 | 0 | 0 | - | - | - | - |
| 417610 | CTGAGGAACAGCGGTCAGCTGAGAAGCAGTGGTCAA | chr6:43323057-43323200 | 0 | 0 | 1 | 0 | 0 | - | - | - | - |
| 417614 | GACGGGGAGACGCGACGACCCCGAGGCGGG | chr6:43336831-43337038 | 0 | 0 | 1 | 0 | 0 | - | - | - | - |
| 417631 | GGCCTGCTGGGGCTCCT | chr6:43413459-43413526 | 0 | 1 | 1 | 0 | 0 | - | - | - | - |
| 417812 | GATGATGAAGAAGAGGAAGAGAAA | chr6:44218057-44218204 | 0 | 0 | 1 | 0 | 0 | - | - | - | - |
| 417814 | TCACTCATTCATTCATTCAT | chr6:44233480-44233610 | 0 | 1 | 1 | 0 | 0 | - | - | - | - |
| 417987 | GGCGGCGGCGGCGGCTGC | chr6:45390486-45390557 | 0 | 1 | 1 | 0 | 0 | - | - | - | - |
| 418888 | GAAAAATGTTTTAAATAAAAGAAG | chr6:50811103-50811148 | 0 | 1 | 1 | 0 | 0 | - | - | - | - |
| 421850 | CCAGGCAAGTCCAGGGAGGC | chr6:70951682-70951738 | 0 | 1 | 1 | 0 | 0 | - | - | - | - |
| 422351 | AGGCCGGGACCCAGCGGTTCGGTGGAAGTCCGGG | chr6:74073317-74073563 | 0 | 0 | 1 | 0 | 0 | - | - | - | - |
| 422674 | CCCTGAGGGCCTGGAGGA | chr6:75812343-75812379 | 0 | 1 | 1 | 0 | 0 | - | - | - | - |
| 423705 | CGCCGCCGCCGAAGT | chr6:82461722-82461800 | 0 | 1 | 1 | 0 | 0 | - | - | - | - |
| 423949 | GGTGGCAGCGGAGGTGGCAGCAGTAGT | chr6:84303233-84303314 | 0 | 1 | 1 | 0 | 0 | - | - | - | - |
| 424010 | GTTTTTTGTTTT | chr6:84649714-84649788 | 0 | 1 | 1 | 0 | 0 | - | - | - | - |
| 424904 | TCTTCCTCCTCA | chr6:90372550-90372622 | 0 | 1 | 1 | 0 | 0 | - | - | - | - |
| 424934 | TTTAATATACTTTTATCTTCTACAAATGTG | chr6:90575616-90575676 | 0 | 1 | 1 | 0 | 0 | - | - | - | - |
| 426091 | CGGCGG | chr6:99282949-99283021 | 0 | 1 | 1 | 0 | 0 | - | - | - | - |
| 426094 | GCAGCA | chr6:99283120-99283216 | 0 | 1 | 1 | 0 | 0 | - | - | - | - |
| 426392 | TAAAAGCAGATAAAATAAGTG | chr6:101163293-101163334 | 0 | 1 | 1 | 0 | 0 | - | - | - | - |
| 427841 | TCTTCCTCT | chr6:109980431-109980510 | 0 | 1 | 1 | 0 | 0 | - | - | - | - |
| 427962 | GCTGCTGATGCTGATTCT | chr6:110942539-110942575 | 0 | 1 | 1 | 0 | 0 | - | - | - | - |
| 428489 | CGGGCGAGGAGGCGGCAG | chr6:114181408-114181461 | 0 | 1 | 1 | 0 | 0 | - | - | - | - |
| 428972 | GCACCACGCGCACCC | chr6:117591895-117592000 | 0 | 1 | 1 | 0 | 0 | - | - | - | - |
| 429573 | CGCCTGCAGCAT | chr6:121655523-121655569 | 0 | 1 | 1 | 0 | 0 | - | - | - | - |
| 429802 | TCCTTCCTCCTTCCT | chr6:123102400-123102459 | 0 | 1 | 1 | 0 | 0 | - | - | - | - |
| 429959 | TTTTTC | chr6:123837298-123837346 | 0 | 1 | 1 | 0 | 0 | - | - | - | - |
| 430945 | CTTAGTAAACTGGTTAACCC | chr6:130536903-130536943 | 0 | 1 | 1 | 0 | 0 | - | - | - | - |
| 431027 | TTGCTCACTGAGGGTTTTTCTTCC | chr6:131277146-131277194 | 1 | 1 | 1 | 0 | 0 | - | - | - | - |
| 431952 | CCATGGCTGGAGCTGGGGACCGAGGCTGGAGCTGGGG | chr6:136683753-136683862 | 0 | 1 | 1 | 0 | 0 | - | - | - | - |
| 432255 | TGAGGAACATTTCAT | chr6:138539235-138539265 | 0 | 1 | 1 | 0 | 0 | - | - | - | - |
| 432399 | GCGGCGGGC | chr6:139456626-139456796 | 0 | 0 | 1 | 0 | 0 | - | - | - | - |
| 432442 | GCTGCCGCCCGAGCCGCCGGGGGTGCT | chr6:139694535-139694616 | 0 | 1 | 1 | 0 | 0 | - | - | - | - |
| 432929 | AAGTCTATGGAAAAGA | chr6:142738460-142738491 | 0 | 1 | 1 | 0 | 0 | - | - | - | - |
| 432962 | GGTGAAAGATGTCTCCTG | chr6:143081155-143081282 | 0 | 1 | 1 | 0 | 0 | - | - | - | - |
| 433773 | CCGGAG | chr6:148664227-148664304 | 0 | 1 | 1 | 0 | 0 | - | - | - | - |
| 434007 | GGAGGGGGAGTCTGTACCTCTT | chr6:150005430-150005499 | 0 | 1 | 1 | 0 | 0 | - | - | - | - |
| 434867 | GGTAGATAAAGTATTACCCTGATTT | chr6:154567914-154567964 | 0 | 1 | 1 | 0 | 0 | - | - | - | - |
| 435385 | CACCACCACCACCACCATGCC | chr6:157099312-157099455 | 0 | 0 | 1 | 0 | 0 | - | - | - | - |
| 435386 | AGGAGGAGCAGGAGC | chr6:157100025-157100128 | 0 | 1 | 1 | 0 | 0 | - | - | - | - |
| 435592 | ACAAATCCGGTAAGAGAACTGTACATTCGAGTCTGATTGTCCCATGTGGACTTATTTTTA | chr6:158288656-158288776 | 1 | 1 | 1 | 0 | 0 | - | - | - | - |
| 435633 | GGTGGGCCCTGGGTCCCCTGCAGAG | chr6:158450057-158450132 | 0 | 1 | 1 | 0 | 0 | - | - | - | - |
| 435763 | GCGGAGGCGGATGGGC | chr6:158957452-158957484 | 0 | 1 | 1 | 0 | 0 | - | - | - | - |
| 435875 | CCACCACCCGCCGCACGA | chr6:159660779-159660899 | 0 | 1 | 1 | 0 | 0 | - | - | - | - |
| 436037 | CGTGGGCAGCA | chr6:160221279-160221354 | 0 | 1 | 1 | 0 | 0 | - | - | - | - |
| 436089 | AGGCTGGCACTGGTGAGAGAGGGCCTCCTCGTGGGGTGGTGGTTGCAGTGAGTGTATCA | chr6:160489405-160489825 | 0 | 0 | 1 | 0 | 0 | - | - | - | - |
| 436094 | GCTCAGCCTGCTGCCTGCTGGC | chr6:160523634-160523676 | 0 | 1 | 1 | 0 | 0 | - | - | - | - |
| 436335 | GCCGCCGCCACCACC | chr6:161413034-161413078 | 0 | 1 | 1 | 0 | 0 | - | - | - | - |
| 437218 | CTTCAGATTACACAGGGTCTTCACGCCTGGCGTCTCGCAGTG | chr6:165715684-165715768 | 0 | 1 | 1 | 0 | 0 | - | - | - | - |
| 438049 | TGGGGGTCATTCCCCCTGCAGTGTGTGGGGAGGAGAAGGCAG | chr6:168376810-168377364 | 0 | 0 | 1 | 0 | 0 | - | - | - | - |
| 438075 | CTGGCCTTCCCAGATGACATGGACCTCAGGTCAGCTTCAGCGTGAGAAGCAGGCCAGGCCTGGGTCTGGAGCCGTC | chr6:168430176-168430404 | 0 | 0 | 1 | 0 | 0 | - | - | - | - |
| 438104 | CCACCGCGGTGCCTGCTCTCTCCCACCCCACGCATCCCCGCGGTCCCACCACAGC | chr6:168467893-168468054 | 0 | 0 | 1 | 0 | 0 | - | - | - | - |
| 438120 | GGCTCTGCTCACCCCACAGCCCTGCTCACCCCCACGGCCCTGCTCACCCCCAC | chr6:168479184-168479585 | 0 | 0 | 1 | 0 | 0 | - | - | - | - |
| 439149 | CCAGGCAAGAAGTTCCCATGTGTACAGACCCTGAAT | chr6:170627487-170628205 | 0 | 0 | 1 | 0 | 0 | - | - | - | - |
| 439233 | TGGACACAGTATCATTACC | chr6:170846284-170846322 | 0 | 1 | 1 | 0 | 0 | - | - | - | - |
| 439419 | TTCATCTCTCCAGGTAGCCTGGCACGGGGGCCCACA | chr7:288383-288853 | 0 | 0 | 1 | 0 | 0 | - | - | - | - |
| 439656 | GGGGCAGGGCTCACCTGGACGCTGCAGTGGTGGACGCGGGAGGGACCCTGGCTGCTAGGTAGGGGCGGCCCTCGGGCTCGGGTGGGGAGGGGAGGGGA | chr7:550045-550541 | 0 | 0 | 1 | 0 | 0 | - | - | - | - |
| 439798 | GGAGGGCGGTGGTGATTCCCGGGCAAGCAACGGGGCCTGCCCACCTCCCGGAGGGCAA | chr7:716416-716881 | 0 | 0 | 1 | 0 | 0 | - | - | - | - |
| 439990 | CCCGCCCGGCCCCCGCGCCCACCCAGGA | chr7:993937-994116 | 0 | 0 | 1 | 0 | 0 | - | - | - | - |
| 440006 | CAGGAGACGTGCCTGCCCCGCCGTGCACACACCTCAGCCCC | chr7:1039867-1040113 | 0 | 0 | 1 | 0 | 0 | - | - | - | - |
| 440348 | CCCGGCCCACCCAGCCAGCCAGCCCAGCACTCAGCATC | chr7:1474646-1474765 | 0 | 1 | 1 | 0 | 0 | - | - | - | - |
| 440356 | TGGACCTGCCGCACAGACACGAGTCTGAGGCCTGACTCTGCCGCCCTGTCCCCCGCCTGGCCCGCCCAGCCCGCAACGAGGTCC | chr7:1477239-1477489 | 0 | 0 | 1 | 0 | 0 | - | - | - | - |
| 440363 | GTCTGGGTGGGAGGCAAGGA | chr7:1480318-1480384 | 0 | 1 | 1 | 0 | 0 | - | - | - | - |
| 440384 | CCCCTCCCCAGGCTGGGTCTCTGTGCTGGCCCCA | chr7:1520388-1520485 | 0 | 1 | 1 | 0 | 0 | - | - | - | - |
| 440389 | CCTCACCCAGCCGTAGACCTCCTCGC | chr7:1523580-1523658 | 0 | 1 | 1 | 0 | 0 | - | - | - | - |
| 440390 | GCTGGCCCCGTCCCCTCCCCAGGGCCACACTGCCG | chr7:1524574-1524781 | 0 | 0 | 1 | 0 | 0 | - | - | - | - |
| 440394 | GGGAGTGGGGAGCGGGGCGCGGGCTTACCCGGGC | chr7:1532481-1532651 | 0 | 0 | 1 | 0 | 0 | - | - | - | - |
| 440648 | CCTGAGCGTGCCCACCTCCCCCTGGGGGACACG | chr7:2019807-2020120 | 0 | 0 | 1 | 0 | 0 | - | - | - | - |
| 440910 | ATGGATGG | chr7:2552850-2552914 | 0 | 1 | 1 | 0 | 0 | - | - | - | - |
| 440924 | CGTCAGCCAAGGTTGCGGTCCCACTGCCGGCGTGGATGCAAGGGTGCTGGGACTGCGAGGCAAGTGGGTGCGGGGGA | chr7:2581134-2581362 | 0 | 0 | 1 | 0 | 0 | - | - | - | - |
| 440948 | TGCTGCAGAGAGAGTAGGTCCTCCCCAGGCCCCGCCAGTGTCCCCACAGGCACAGG | chr7:2629727-2629951 | 0 | 0 | 1 | 0 | 0 | - | - | - | - |
| 440966 | GGCCGAGCCG | chr7:2671613-2671790 | 0 | 0 | 1 | 0 | 0 | - | - | - | - |
| 441299 | CTACCTGGATGTAACCAGTGGGTACACCCAGGCTCACAGCTACCTGACCTGGACGTATCCAGTGAGTACACTCAGCCCCATGG | chr7:4002466-4003701 | 0 | 0 | 1 | 0 | 0 | - | - | - | - |
| 441587 | GGGCTCCTCCGG | chr7:4722142-4722186 | 0 | 1 | 1 | 0 | 0 | - | - | - | - |
| 441652 | CCCGGGCACCTCGGGGCACGCTGGCTGGGGGGCCCCCTCCCCGGGCACCTCGGGGCACGCTGGCTGGGCCCCCTC | chr7:4841895-4843243 | 0 | 0 | 1 | 0 | 0 | - | - | - | - |
| 441763 | GAGAAGCCCTATAAATGTAACGAATGTGGGAAAACCTTCTGCCAAAAGACACACCTCACCCAACACCTAGAGGAACTCATTCAGGA | chr7:5104026-5105196 | 0 | 0 | 1 | 0 | 0 | - | - | - | - |
| 441849 | GGAGGAGGA | chr7:5352508-5352689 | 0 | 0 | 1 | 0 | 0 | - | - | - | - |
| 441857 | CCTCGTCCTCCT | chr7:5385387-5385438 | 0 | 1 | 1 | 0 | 0 | - | - | - | - |
| 442031 | CCCCACCCCCTTTCTGCCCTCCACATGGCCA | chr7:6000137-6000345 | 0 | 0 | 1 | 0 | 0 | - | - | - | - |
| 442067 | CAAAGAAGCAAAAAGAAATC | chr7:6194759-6194816 | 0 | 1 | 1 | 0 | 0 | - | - | - | - |
| 442079 | CCCAGCCGCCGGCCCCCGACC | chr7:6312023-6312126 | 0 | 1 | 1 | 0 | 0 | - | - | - | - |
| 442170 | CAGCAGGAACAGTTACAGACGCAGCAAGTGCAAGAGCAACAGCGGTTACAGCAG | chr7:6661084-6661780 | 0 | 0 | 1 | 0 | 0 | - | - | - | - |
| 442210 | TTTTCCACATTCATTACATTCATAGGGTTTCTCTCCTGAATGAGTTCTATGATGTACAGTGAGGTATGACATCTGAGAGAAGGC | chr7:6730568-6732129 | 0 | 0 | 1 | 0 | 0 | - | - | - | - |
| 442928 | AAAGGAAAAGGAGAAAGAGAAGGAAAAAGA | chr7:11022221-11022313 | 0 | 1 | 1 | 0 | 0 | - | - | - | - |
| 442947 | TTTTTTTTTTTG | chr7:11101381-11101417 | 0 | 1 | 1 | 0 | 0 | - | - | - | - |
| 443051 | GCAGCAGCAGCGAGCAGCG | chr7:11871457-11871531 | 0 | 1 | 1 | 0 | 0 | - | - | - | - |
| 445404 | CGGTGGCGGCGG | chr7:27141752-27141789 | 0 | 1 | 1 | 0 | 0 | - | - | - | - |
| 445408 | CCGCCCGAGCCGCCGTGCTGCG | chr7:27170239-27170282 | 0 | 1 | 1 | 0 | 0 | - | - | - | - |
| 445413 | GCGGCAGCG | chr7:27239298-27239362 | 0 | 1 | 1 | 0 | 0 | - | - | - | - |
| 445414 | GCAGCCGCCGCCGCT | chr7:27239544-27239589 | 0 | 1 | 1 | 0 | 0 | - | - | - | - |
| 445898 | CCGGCGGCCCCGGCAGCC | chr7:30325157-30325394 | 0 | 0 | 1 | 0 | 0 | - | - | - | - |
| 447296 | CAGCAGCTCCAG | chr7:39379266-39379351 | 0 | 1 | 1 | 0 | 0 | - | - | - | - |
| 447418 | AGCAAGAGCAGCAGAAGC | chr7:40027359-40027431 | 0 | 1 | 1 | 0 | 0 | - | - | - | - |
| 447927 | CGTCCTGCTACAGCACCTCGTGCTACAGCGCCTCGTGCTACAGCA | chr7:43484794-43484932 | 0 | 1 | 1 | 0 | 0 | - | - | - | - |
| 448071 | AAGGAGAAGCCACCCAAGGCCACCAAGAAGCCC | chr7:44146251-44146383 | 0 | 1 | 1 | 0 | 0 | - | - | - | - |
| 448074 | GAGGTGGAGCCCGAGTTTGAGACC | chr7:44153644-44153789 | 0 | 0 | 1 | 0 | 0 | - | - | - | - |
| 448077 | CGCCGCAACCCGCCAATCCCCGCGCGCCTGCCCCGCCCAT | chr7:44163118-44163239 | 0 | 1 | 1 | 0 | 0 | - | - | - | - |
| 448288 | CCTCTTCCTCCTCCT | chr7:45120473-45120503 | 0 | 1 | 1 | 0 | 0 | - | - | - | - |
| 448370 | GCGGCGGAGGCG | chr7:45614158-45614240 | 0 | 1 | 1 | 0 | 0 | - | - | - | - |
| 448391 | GGTGGCCTGTGTCCTGTACCTGCATATCACCTGGTCCAGGTATGTG | chr7:45719352-45719628 | 0 | 0 | 1 | 0 | 0 | - | - | - | - |
| 448858 | CTGGCCTTGAGCAAGGAGTGCCCGGGTGTACTTGAGGATGAGAACCGCACTCATAAAGCCTAGCTGCATGAACAGAAAAGATGTAAATAAAATGC | chr7:47898420-47898610 | 0 | 0 | 1 | 0 | 0 | - | - | - | - |
| 448877 | GCCTGTGTTTTTTCATTAACAACA | chr7:47976472-47976520 | 1 | 1 | 1 | 0 | 0 | - | - | - | - |
| 450125 | ACACACAGACAC | chr7:54269194-54269632 | 0 | 0 | 1 | 0 | 0 | - | - | - | - |
| 450932 | CTTTGCCACATTCTTCACATTTGTAGGGTTTCTCTCCAGTATGAATTCTCTTATGTTCAGTAAGGGTTGAGGAGCAACTAAAGG | chr7:57187536-57188628 | 0 | 0 | 0 | 1 | 40 | 20 | 20 | 0 | 0 |
| 452097 | GAGAGAAACCCTACAAATGTGAAGAATGTGGCAAAGCCTTTACGTGGTTCTCAGACCTTACTAAACATAAGAGAATTCATACTG | chr7:63537932-63539688 | 0 | 0 | 1 | 0 | 0 | - | - | - | - |
| 452136 | CCTACAAATGTGAAGAATGTGGCAAAGCCTTTAACTGCTCCTCAACCTTACTACACATAAGAGAATTCATACTGGAGAGAAAC | chr7:63680063-63680894 | 0 | 0 | 1 | 0 | 0 | - | - | - | - |
| 452162 | ACAAATGTGAAGAATGTGGCAAAGCCTTTAAGTTGTTCTCAGACCTTACTAAACATAAGAGAATTCATACTGGAGAGAAACCCT | chr7:63808758-63809596 | 0 | 0 | 1 | 0 | 0 | - | - | - | - |
| 452197 | TTTGTAGGGTTTCTCTCCAGTATGAATTCTCTTATGTTAGTAAGGTTGAGAACCAGTTAAAAGCTTTGCCACATTCTTCACA | chr7:63981574-63982666 | 0 | 0 | 0 | 1 | 40 | 13 | 0 | 20 | 20 |
| 452326 | CTACAAATGTGAAGAATGTGGCAAAGCCTTTAACCGGTCCTCAAACCTTACTAAACATAAGATAATTCATACTGGAGAGAAACC | chr7:64388404-64389496 | 0 | 0 | 1 | 1 | 40 | 24 | 0 | 20 | 20 |
| 452344 | TCCAGTATGAATTTTCTTATGTGTAGTAAGGTTTGAGGATAGGTTAAAAGCTTTGCCACATTCTTCACATTTGTAGGGTTTCTC | chr7:64437200-64439718 | 0 | 0 | 1 | 0 | 0 | - | - | - | - |
| 453913 | CAGCAC | chr7:70231206-70231254 | 0 | 1 | 1 | 0 | 0 | - | - | - | - |
| 454244 | AGAAGAGGAGGAGGAGGAAGAGGGGCAGGGAGAAGAGGGA | chr7:71570709-71571165 | 0 | 0 | 1 | 0 | 0 | - | - | - | - |
| 454685 | TCTTCTTCCTCCTCCTCC | chr7:72861616-72861685 | 0 | 1 | 1 | 0 | 0 | - | - | - | - |
| 454736 | GACCTGCAAGCCCGCCGGCCA | chr7:73038780-73038821 | 0 | 1 | 1 | 0 | 0 | - | - | - | - |
| 454758 | CGGAGCCGGAG | chr7:73082177-73082339 | 0 | 0 | 1 | 0 | 0 | - | - | - | - |
| 454767 | CCCCCCAGCCCCAAACTCAGCAGCAGCCTCAGGCCCCCGC | chr7:73118250-73118494 | 0 | 0 | 1 | 0 | 0 | - | - | - | - |
| 454927 | AGTTGGTGTCCCAGG | chr7:73467541-73467640 | 0 | 1 | 1 | 0 | 0 | - | - | - | - |
| 454934 | GGAGTCGGAGGTGTCCCT | chr7:73470677-73470767 | 0 | 1 | 1 | 0 | 0 | - | - | - | - |
| 454938 | TCCTGGAGTTGGCGTGGC | chr7:73474222-73474367 | 0 | 0 | 1 | 0 | 0 | - | - | - | - |
| 454939 | TTGGTGCTGGCGTCCCTGGACTTGGAG | chr7:73474720-73474828 | 0 | 1 | 1 | 0 | 0 | - | - | - | - |
| 455411 | GGAAGAACCGCTCTCGCATACCCTTGCTCCGTAAGCGTCGGTTCCAGTTAGGCCGTTCCATGAACCCGAGGGCCA | chr7:75130753-75131053 | 0 | 0 | 0 | 0 | 0 | - | - | - | - |
| 455964 | TAACTTTTAATTAAATCCATGATTCTTCAGGTAAAAAGAACGTATT | chr7:77394736-77394827 | 0 | 1 | 1 | 0 | 0 | - | - | - | - |
| 456018 | GGGGAGTGCTGCCTGTAGTCCAGTA | chr7:77756556-77756698 | 0 | 0 | 1 | 0 | 0 | - | - | - | - |
| 456019 | GCTGCGCCAGGGGACTCT | chr7:77762284-77762338 | 0 | 1 | 1 | 0 | 0 | - | - | - | - |
| 456821 | GAGGAAGGTCTG | chr7:82544411-82544435 | 1 | 1 | 1 | 0 | 0 | - | - | - | - |
| 456826 | GGAGGAGGTGGTGGGGGA | chr7:82582982-82583054 | 0 | 1 | 1 | 0 | 0 | - | - | - | - |
| 456833 | GGAGTGGCTTTTTTTCTTCA | chr7:82595355-82595505 | 0 | 0 | 1 | 0 | 0 | - | - | - | - |
| 456874 | GAGGGCTTTGCTGGGCCAGGCTGTTGAGGTGGGGGTTTTGCTGAGCCAGGCTGTTGAGATGGGGGCTTTGTTGAGCCAGGCTGTTGAGGT | chr7:82784307-82785012 | 0 | 0 | 1 | 0 | 0 | - | - | - | - |
| 458546 | CCTCCTGGCCCACCTGGT | chr7:94029555-94029591 | 0 | 1 | 1 | 0 | 0 | - | - | - | - |
| 458548 | CTGCTGGTC | chr7:94049557-94049584 | 1 | 1 | 1 | 0 | 0 | - | - | - | - |
| 458552 | GGTCCTGCTGGTCCTGTT | chr7:94055309-94055365 | 0 | 1 | 1 | 0 | 0 | - | - | - | - |
| 459259 | GCAGGTGGGCACAGGGCAGGT | chr7:98256652-98256715 | 0 | 1 | 1 | 0 | 0 | - | - | - | - |
| 459375 | CCTGGCCCTGCTCCCACCTCCACCC | chr7:98507807-98507906 | 0 | 1 | 1 | 0 | 0 | - | - | - | - |
| 459387 | AGAGGAGGTGAGGCCCCGCGCCCCACGGGCAGAATCCCAG | chr7:98567907-98568110 | 0 | 0 | 1 | 0 | 0 | - | - | - | - |
| 459398 | TTCACAGGTAGGGATGAGAGCCACACCTCGCTGGGGTACACAGGCAGC | chr7:98602964-98603058 | 0 | 1 | 1 | 0 | 0 | - | - | - | - |
| 459520 | TGTGAAGCATCTGATAAATCC | chr7:99170538-99170580 | 0 | 1 | 1 | 0 | 0 | - | - | - | - |
| 459684 | AATCCACACTGGAGAGAAACCCTATGAATGTAATGAGTGTGGGAAGGCCTTCAGCCACAGCTCCAACCTCATCCTGCATCAGAG | chr7:99631318-99631738 | 0 | 0 | 1 | 1 | 22 | 15 | 0 | 11 | 11 |
| 459687 | TTCTCCCCAGTGTGGATTCTCTGATGCTGAATAAGGGCTGAGCTCTAGCTGAAGGCTTTCCCACACTCATTACATTCATAGGGT | chr7:99668841-99669597 | 0 | 0 | 1 | 1 | 40 | 23 | 0 | 20 | 20 |
| 459693 | AGGAGGAAG | chr7:99722419-99722480 | 0 | 1 | 1 | 0 | 0 | - | - | - | - |
| 459885 | CCACAGAAAAACCCACCATCCCCACAGAAAAACCCACCATCCCCACAGAAAAACCCACCATCTCCACAGAAAAACCCACCATCC | chr7:100349466-100350725 | 0 | 0 | 1 | 0 | 0 | - | - | - | - |
| 459950 | CACCACCACCGAGACCACCTCACACAGTACTCCCAGCTTCACTTCTTCAAT | chr7:100550585-100551300 | 0 | 0 | 1 | 0 | 0 | - | - | - | - |
| 459964 | CACAACACTGTTCCCTGCCAGCACCACAAGCTCAGGCTCAGTGAAGAATCTACAACCTTCCACAGCAGCCCAGGCTCAACGCA | chr7:100636345-100648174 | 0 | 0 | 1 | 0 | 0 | - | - | - | - |
| 460018 | GGGGGCGGCACGG | chr7:100806630-100806656 | 1 | 1 | 1 | 0 | 0 | - | - | - | - |
| 460019 | GGCCTCCACCTGCCGCCAGCCC | chr7:100807185-100807227 | 0 | 1 | 1 | 0 | 0 | - | - | - | - |
| 460412 | GAGAGCGGTTCTTCCTGGCCCTCGGGTTCATGGAACGGTATAACTGGAACCGACGCTTACGGAGCAAGGGTATGC | chr7:101988809-101989034 | 0 | 0 | 1 | 0 | 0 | - | - | - | - |
| 460498 | AGGAAGAACCGCTCTCGCATACCCTTGCTCCGTAAGCGTCGGTTCCAGTTATACCGTTCCATGAACCCGAGGGCC | chr7:102201113-102201413 | 0 | 0 | 0 | 0 | 0 | - | - | - | - |
| 460540 | AGGAAGAACCGCTCTCGCATACCCTTGCTCCGTAAGCGTCGGTTCCAGTTATACCGTTCCATGAACCCGAGGGCC | chr7:102300203-102300503 | 0 | 0 | 0 | 0 | 0 | - | - | - | - |
| 462446 | GCAGCAGCAACA | chr7:114269915-114270059 | 0 | 0 | 1 | 0 | 0 | - | - | - | - |
| 462912 | CCGCCGCCTCCGCCGCGGCCC | chr7:117513387-117513429 | 0 | 1 | 1 | 0 | 0 | - | - | - | - |
| 463852 | ATCTTC | chr7:123324602-123324638 | 0 | 1 | 1 | 0 | 0 | - | - | - | - |
| 464540 | TGTTGCTGCTGCGGA | chr7:127668941-127668970 | 0 | 1 | 1 | 0 | 0 | - | - | - | - |
| 464577 | TCATCATCATCG | chr7:127975987-127976035 | 0 | 1 | 1 | 0 | 0 | - | - | - | - |
| 464679 | GAGGAAGAAGAG | chr7:128434427-128434487 | 0 | 1 | 1 | 0 | 0 | - | - | - | - |
| 464682 | AAAGAGGAGGAAAAGAAAGCAAGAG | chr7:128455724-128455899 | 0 | 0 | 1 | 0 | 0 | - | - | - | - |
| 464702 | GCCGCCCACTCTGCA | chr7:128587344-128587435 | 0 | 1 | 1 | 0 | 0 | - | - | - | - |
| 465008 | TCGGAGCACGGGATCGGG | chr7:130418477-130418532 | 0 | 1 | 1 | 0 | 0 | - | - | - | - |
| 465095 | GGCGAC | chr7:131241029-131241077 | 0 | 1 | 1 | 0 | 0 | - | - | - | - |
| 465674 | AAGCAGAAGAAAGAGAAAGAATTA | chr7:134618337-134618710 | 0 | 0 | 1 | 0 | 0 | - | - | - | - |
| 466600 | TTTCTATTATGTACGATAT | chr7:139575455-139575493 | 1 | 1 | 1 | 0 | 0 | - | - | - | - |
| 466637 | CTCCCCACCAGCCTTACCA | chr7:139756619-139756657 | 1 | 1 | 1 | 0 | 0 | - | - | - | - |
| 466955 | CCCCAGATCCTGGGACAACTGGTA | chr7:141708305-141708425 | 0 | 1 | 1 | 0 | 0 | - | - | - | - |
| 467013 | TACTGTTCCTATACAACCACACCTTTCCCAACAAGTACTACTAGTGCTACACTAATGC | chr7:141919878-141920778 | 0 | 0 | 1 | 0 | 0 | - | - | - | - |
| 467067 | TGACCAGGTGCACAGGAGGAATGAGGGGTTCCGCAACAGGGCTGGCAGGAGCTCACAGGCCCCACAGTAGGGGCCCAGAGG | chr7:142564353-142564511 | 0 | 0 | 1 | 0 | 0 | - | - | - | - |
| 467098 | GGAGCCAGACAGAGAAAACACCCTCTGCAGGTAGGTAGAAAAAAAGACA | chr7:142636821-142636919 | 0 | 1 | 1 | 0 | 0 | - | - | - | - |
| 467170 | GGGGTCTCCACCAAGCGCAGTCTCAGAATGCCCAAGAGCCCCACCGTCGCCC | chr7:143077425-143077529 | 0 | 1 | 1 | 0 | 0 | - | - | - | - |
| 468180 | TCTTCATCCTCATCATCA | chr7:148718166-148718220 | 0 | 1 | 1 | 0 | 0 | - | - | - | - |
| 468221 | TGCAGAAAAAAAGACACAAAGCAATGTCATTCTCTGTCCCCAGGAGCAGAGCCCCTGGTGCC | chr7:148907571-148907695 | 0 | 1 | 1 | 0 | 0 | - | - | - | - |
| 468225 | CCCAGC | chr7:148920928-148921019 | 0 | 1 | 1 | 0 | 0 | - | - | - | - |
| 468226 | CGGGGGCGG | chr7:148921138-148921210 | 0 | 1 | 1 | 0 | 0 | - | - | - | - |
| 468273 | GGGTAGGGCCGCTCGCCCGTGTGCGACGCGCCGGTGCTCCAGCAGGTGATGCTTCTGCGGATGAAGCGCTTGCCGCACTCGGCGCA | chr7:149128942-149129451 | 0 | 0 | 1 | 0 | 0 | - | - | - | - |
| 468274 | TCCTCCTCCTCTTCT | chr7:149129968-149130028 | 0 | 1 | 1 | 0 | 0 | - | - | - | - |
| 468278 | CGCTGCCGCCAC | chr7:149171899-149171961 | 0 | 1 | 1 | 0 | 0 | - | - | - | - |
| 468323 | CCCCCTCCGGAAGCTG | chr7:149430350-149430416 | 0 | 1 | 1 | 0 | 0 | - | - | - | - |
| 468341 | CCACAGTCCCCTCAGTCCCCTCCTCCTCCTGTGCTCTCTCCCGTCCCCCCCACAGTCCCCTCAGCCATCCCCTCCTCCTGTGTCCCCT | chr7:149526302-149528238 | 0 | 0 | 1 | 0 | 0 | - | - | - | - |
| 468542 | GCCCTACGTCTGTCCCGACTGCGGCAAAGCCTTCAGCCACAAACCCAACCTGGCGGCGCACCGGCGCATCCACACCGGCGAGAA | chr7:150069700-150069953 | 0 | 0 | 1 | 0 | 0 | - | - | - | - |
| 468671 | GAAGTCTAGACCTGCTGCAGGGGTGAG | chr7:150694257-150694392 | 0 | 1 | 1 | 0 | 0 | - | - | - | - |
| 468683 | TCCTGGACTCCTTGTCCTGTT | chr7:150732909-150732970 | 0 | 1 | 1 | 0 | 0 | - | - | - | - |
| 468703 | CCTTTTCTTCCTTT | chr7:150894301-150894397 | 0 | 1 | 1 | 0 | 0 | - | - | - | - |
| 468711 | ACCCCACCCAATCAC | chr7:150915802-150915847 | 0 | 1 | 1 | 0 | 0 | - | - | - | - |
| 468712 | TTTGGCAGCCTCCTTCTT | chr7:150923490-150923526 | 0 | 1 | 1 | 0 | 0 | - | - | - | - |
| 469742 | GCTGCTGCTGCTGCTGCTGGAGCAG | chr7:154760268-154760691 | 0 | 0 | 1 | 0 | 0 | - | - | - | - |
| 469749 | CTTCCTCCTCCT | chr7:154767878-154767914 | 0 | 1 | 1 | 0 | 0 | - | - | - | - |
| 470045 | AAGAAGAATCAGATG | chr7:155493503-155493549 | 0 | 1 | 1 | 0 | 0 | - | - | - | - |
| 470048 | CATTCAATCAGCAAGGACCAG | chr7:155530873-155530914 | 0 | 1 | 1 | 0 | 0 | - | - | - | - |
| 470050 | CAGCACCAGCCCCCGCCC | chr7:155532462-155532609 | 0 | 0 | 1 | 0 | 0 | - | - | - | - |
| 470085 | CCGCCGCCGCGGTCC | chr7:155595756-155595818 | 0 | 1 | 1 | 0 | 0 | - | - | - | - |
| 470087 | AGCAGCAGACATCTCGCC | chr7:155604787-155604822 | 0 | 1 | 1 | 0 | 0 | - | - | - | - |
| 470581 | GTCCTCGTCCTCCTC | chr7:156798321-156798351 | 0 | 1 | 1 | 0 | 0 | - | - | - | - |
| 470783 | GTTTCCCCCGCCTGTAACCCAGGCCTCCTGCCCCCGGGACTGGTATGTACAGGTCAGCACGGCCA | chr7:157413548-157414068 | 0 | 0 | 1 | 1 | 40 | 38 | 0 | 18 | 20 |
| 471694 | CCCCACTCATTCATTGAGGCGCCCCTCCCCCACGCCCCGCACTCAGAGGCGCCCCTCCCCCAACGCC | chr7:158379809-158380274 | 0 | 0 | 1 | 0 | 0 | - | - | - | - |
| 472156 | TCACACTGGAGAGAAACCATATGGATGTCATCTATGTGGGAAAGCCTTCACTAAATTTTCTGACCTTAGACAACATGAGAGAAC | chr8:195494-196571 | 0 | 0 | 1 | 0 | 0 | - | - | - | - |
| 472303 | TCTTCCTCACTGGCGTCCGCACCGTCCTCCTCCCTGGAGTCTTTACCGTCTTCCTCCCCGGCCCGTGTCGGG | chr8:623365-623778 | 0 | 0 | 1 | 0 | 0 | - | - | - | - |
| 472960 | CAGGTGAGTCCC | chr8:1806278-1806447 | 0 | 0 | 1 | 0 | 0 | - | - | - | - |
| 473020 | CCGCGTCCCCGGAGGAGC | chr8:1949611-1949725 | 0 | 1 | 1 | 0 | 0 | - | - | - | - |
| 474156 | TGTGGAAACTCAGGA | chr8:6301957-6301986 | 0 | 1 | 1 | 0 | 0 | - | - | - | - |
| 474440 | ACTCACACGGGAGAGAGACCATATGAAGTGTCATCAATGTGGAAAAGCCTTCACTCAATCCTTCTAACCTTAGAAGACATGAGAAA | chr8:7809586-7810006 | 0 | 0 | 0 | 1 | 22 | 6 | 4 | 0 | 0 |
| 474927 | CCTTCTGACTCTGGCTGGGCCTCCCCTTCTGCCTCCTGGGCCTCTACA | chr8:10464879-10466085 | 0 | 0 | 1 | 0 | 0 | - | - | - | - |
| 474935 | CCTCTTCTTGCAGTCCTCCTTCTGCTTCTTTAGTTTCCTCTAACTGCACCC | chr8:10467442-10467710 | 0 | 0 | 1 | 0 | 0 | - | - | - | - |
| 474963 | CCCCATATCATACCCTGCAAC | chr8:10531360-10532157 | 0 | 0 | 1 | 0 | 0 | - | - | - | - |
| 475222 | CCCACT | chr8:11666213-11666278 | 0 | 1 | 1 | 0 | 0 | - | - | - | - |
| 475271 | ACTCACACGGGAGAGAGACCATATGAAGTGTCATCAATGTGGAAAAGCCTTCACTCAATCCTTCTAACCTTAGAAGACATGAGAAA | chr8:11970340-11970760 | 0 | 0 | 0 | 1 | 22 | 9 | 1 | 0 | 0 |
| 475420 | CCAGGCAGCCTCATCGCTGACATAGGTAA | chr8:12863840-12863985 | 0 | 0 | 1 | 0 | 0 | - | - | - | - |
| 477010 | GGAGGAGGAAGAGGAAGAAGAAGAGGA | chr8:21891638-21891722 | 0 | 1 | 1 | 0 | 0 | - | - | - | - |
| 477035 | CTCTGCGCGCTGGGCCAGGCCGAGGTGGGAGGC | chr8:21953996-21954163 | 0 | 0 | 1 | 0 | 0 | - | - | - | - |
| 477036 | GGGGACACGGCTCTGACAGGCGCTCTGTCCCTGGCCTCAGTACCCCCCAGGCATGCGGCAGGCA | chr8:21954794-21955049 | 0 | 0 | 1 | 0 | 0 | - | - | - | - |
| 477143 | AGGAAGAAGCCACCAAAG | chr8:22473654-22473690 | 0 | 1 | 1 | 0 | 0 | - | - | - | - |
| 477209 | ATCAACACCACCACC | chr8:22864728-22864758 | 0 | 1 | 1 | 0 | 0 | - | - | - | - |
| 477228 | CCCCAGCTGCTGAAGAGACAATGAACACCAGCCCGGGGACTCCTG | chr8:22974245-22974470 | 0 | 0 | 1 | 0 | 0 | - | - | - | - |
| 477534 | AAGAAGAGGAGG | chr8:24774929-24775136 | 0 | 0 | 1 | 0 | 0 | - | - | - | - |
| 477536 | AAAGGCAAGTCTCCTGTGCCAAAATCACCAGTGGAAGAG | chr8:24775201-24775435 | 0 | 0 | 1 | 0 | 0 | - | - | - | - |
| 477537 | GAGAGGGAGAAAGCGAGGAG | chr8:24775684-24775822 | 0 | 1 | 1 | 0 | 0 | - | - | - | - |
| 477768 | GCTCACCGTTGCTGTAGAAGA | chr8:25898427-25898469 | 0 | 1 | 1 | 0 | 0 | - | - | - | - |
| 478117 | TCTCCTTTC | chr8:27762311-27762338 | 0 | 1 | 1 | 0 | 0 | - | - | - | - |
| 478170 | AGAAGGAAAGAAAGAAAAGGA | chr8:27925561-27925752 | 0 | 0 | 1 | 0 | 0 | - | - | - | - |
| 480002 | TCTCCGTCATCTTCAACCTGA | chr8:37729359-37729421 | 0 | 1 | 1 | 0 | 0 | - | - | - | - |
| 480907 | CTCCTCTGAATGCCTGCTGCTC | chr8:41791852-41791894 | 0 | 1 | 1 | 0 | 0 | - | - | - | - |
| 480964 | GCTGCCTGGAGCAGGCCTCGTGACGTGGGGGGACTCGACCCCCTGACATGGG | chr8:42188474-42188635 | 0 | 0 | 1 | 0 | 0 | - | - | - | - |
| 482593 | TTTTTCATCCTCTTCCAT | chr8:52733030-52733081 | 0 | 1 | 1 | 0 | 0 | - | - | - | - |
| 483055 | CACCAG | chr8:55372258-55372294 | 0 | 1 | 1 | 0 | 0 | - | - | - | - |
| 483273 | AAGAAGAAGAAC | chr8:56715026-56715062 | 0 | 1 | 1 | 0 | 0 | - | - | - | - |
| 483395 | TTCATGAAGCCCCCATACCTT | chr8:57354299-57354341 | 0 | 1 | 1 | 0 | 0 | - | - | - | - |
| 483810 | GCTGCTGCATGGTGAGAGGCTGGT | chr8:59727958-59728006 | 0 | 1 | 1 | 0 | 0 | - | - | - | - |
| 484612 | GCAGCGGCGGTAGCAGTAGCG | chr8:65493969-65494052 | 0 | 1 | 1 | 0 | 0 | - | - | - | - |
| 484826 | AGAAGGAGAAGAAGAAGG | chr8:67064624-67064695 | 0 | 1 | 1 | 0 | 0 | - | - | - | - |
| 484992 | GAAGAAAGACAAAAAGAAA | chr8:68071261-68071317 | 0 | 1 | 1 | 0 | 0 | - | - | - | - |
| 485126 | TATGAAACATCGACT | chr8:68992753-68992782 | 0 | 1 | 1 | 0 | 0 | - | - | - | - |
| 486501 | CCACAG | chr8:77766481-77766517 | 0 | 1 | 1 | 0 | 0 | - | - | - | - |
| 487045 | GGGCTCCACCTTCTGTAG | chr8:80942261-80942297 | 1 | 1 | 1 | 0 | 0 | - | - | - | - |
| 487140 | AGGTACTTCAAATGATTTCAAGTATGGATTGATACC | chr8:81430635-81430779 | 0 | 0 | 1 | 0 | 0 | - | - | - | - |
| 487964 | CCGCAGCCGCAGCC | chr8:86089721-86089818 | 0 | 1 | 1 | 0 | 0 | - | - | - | - |
| 488192 | TACAGGAAAATGGAGATGCCT | chr8:87410806-87410847 | 0 | 1 | 1 | 0 | 0 | - | - | - | - |
| 488246 | TCTTCATTTTCTTTA | chr8:87588229-87588356 | 0 | 1 | 1 | 0 | 0 | - | - | - | - |
| 488975 | AAAGTGACTAAAATTATTATCTAACAGATGGCT | chr8:92139257-92139321 | 0 | 1 | 1 | 0 | 0 | - | - | - | - |
| 489397 | TCTTCCTCTGGGGGCTCCTGAAGTCCTCATCAGGAGGGTGCCTAAAA | chr8:94746089-94746809 | 0 | 0 | 1 | 1 | 40 | 20 | 0 | 20 | 20 |
| 489406 | GCCTGAAGTCCTCTGGGGAGT | chr8:94746897-94747055 | 0 | 0 | 1 | 0 | 0 | - | - | - | - |
| 489412 | GGAATTATACAGGTAA | chr8:94811974-94812006 | 1 | 1 | 1 | 0 | 0 | - | - | - | - |
| 489549 | CTTCATCCTCTTCAC | chr8:95541306-95541411 | 0 | 1 | 1 | 0 | 0 | - | - | - | - |
| 489554 | GGAGGTGGTGGCGGT | chr8:95547104-95547134 | 0 | 1 | 1 | 0 | 0 | - | - | - | - |
| 489613 | TTTTATTTTAATTATATTCTTTCAG | chr8:95800071-95800121 | 1 | 1 | 1 | 0 | 0 | - | - | - | - |
| 490918 | TGCAGCCCC | chr8:103572983-103573046 | 0 | 1 | 1 | 0 | 0 | - | - | - | - |
| 493175 | TCTTTTTCCTTC | chr8:117862875-117862911 | 0 | 1 | 1 | 0 | 0 | - | - | - | - |
| 494161 | TCCTCCTCCTCCTCCTCTTCCTCCTCCCACTTCCCCTCCCCCTCC | chr8:124219150-124219412 | 0 | 0 | 1 | 0 | 0 | - | - | - | - |
| 494196 | TTCATCATC | chr8:124382122-124382247 | 0 | 1 | 1 | 0 | 0 | - | - | - | - |
| 495329 | GCAGGTCTCCCAGCTGTGGTTTGGGGG | chr8:131073021-131073255 | 0 | 0 | 1 | 0 | 0 | - | - | - | - |
| 495722 | CCGCCGCCGCCGCCGCCAGCCGCCC | chr8:133492703-133492823 | 0 | 1 | 1 | 0 | 0 | - | - | - | - |
| 495863 | CCCTCGCTGGTGTGGGAGCGGCTGCGGGTG | chr8:134251199-134251289 | 0 | 1 | 1 | 0 | 0 | - | - | - | - |
| 497369 | ACCCCCCGTGACTCCTCACGGT | chr8:141468470-141468512 | 0 | 1 | 1 | 0 | 0 | - | - | - | - |
| 497412 | CGCGGCCCCCGCTCGCCCCGACCC | chr8:141645436-141645727 | 0 | 0 | 1 | 0 | 0 | - | - | - | - |
| 498113 | GACGCTCCTGCTGCA | chr8:143396428-143396458 | 1 | 1 | 1 | 0 | 0 | - | - | - | - |
| 498246 | GGTGGGCAGCCCAGGGCAGGTGG | chr8:143570470-143570568 | 0 | 1 | 1 | 0 | 0 | - | - | - | - |
| 498364 | GCGCCGTGCTGCAGCCGC | chr8:143808849-143808923 | 0 | 1 | 1 | 0 | 0 | - | - | - | - |
| 498381 | GTGACTGGGCTGGAGGTGGCTCTGACCGGGAACCCAGCCCTGCCCGCCTTCCGTGCCCACTGACCTATCTCCCGGGAGTAGAGT | chr8:143832320-143832488 | 0 | 0 | 1 | 0 | 0 | - | - | - | - |
| 498678 | AGCACCAGCGCATCCACACGGGCGAGAAGCCCTACGAGTGCGGCGAGTGCGGCAAGGCCTTCAGCCACAGCTCGCACTTCATCGC | chr8:144358441-144359030 | 0 | 0 | 1 | 0 | 0 | - | - | - | - |
| 498685 | TGCGGCAAGGCCTTCAGCCAGAGCTCGAACGTCGTCCGGCACCAGCGCGCGCACACGGGGAGAGGCCCTACGCGTGCGCCGAG | chr8:144378316-144378986 | 0 | 0 | 1 | 0 | 0 | - | - | - | - |
| 498728 | GGGTTCTGGACGGAGGTTCTGGAAGGAGGC | chr8:144450347-144450438 | 0 | 0 | 1 | 0 | 0 | - | - | - | - |
| 498787 | TGGTGGTGGTGGGCGGCG | chr8:144511953-144512027 | 0 | 1 | 1 | 0 | 0 | - | - | - | - |
| 498789 | GTGGTGCGCGCC | chr8:144512108-144512157 | 0 | 1 | 1 | 0 | 0 | - | - | - | - |
| 498790 | CAGCTCCGCGCCCATCGC | chr8:144512543-144512600 | 0 | 1 | 1 | 0 | 0 | - | - | - | - |
| 498792 | GCCCGAGCCAGGCCATGCTGCCTACCTGAGTCCTTGGTGAGGGGGGCCCTGGGG | chr8:144521967-144522240 | 0 | 0 | 1 | 0 | 0 | - | - | - | - |
| 498834 | CCCCGCTGCACGGGCCGCCGCC | chr8:144680162-144680204 | 0 | 1 | 1 | 0 | 0 | - | - | - | - |
| 498835 | CCCGACCGCGCCCCGGC | chr8:144680721-144680753 | 0 | 1 | 1 | 0 | 0 | - | - | - | - |
| 498862 | TCCCCGGGTGTGTGGAGCCCCCGGCTGGGGAGGTGTCGGA | chr8:144774454-144775097 | 0 | 0 | 1 | 0 | 0 | - | - | - | - |
| 498867 | CCCGGGAGGCCGCGCGCGACGGGACCACAGACGAGG | chr8:144789183-144789291 | 0 | 1 | 1 | 0 | 0 | - | - | - | - |
| 498874 | CTGACCCCGGGGTTGACCCA | chr8:144803666-144803725 | 0 | 1 | 1 | 0 | 0 | - | - | - | - |
| 498876 | CTGCCCCTGCGCTCCGGCACGGGGGGCACCGGA | chr8:144808823-144808918 | 0 | 1 | 1 | 0 | 0 | - | - | - | - |
| 498906 | TCGCTCTCGTCC | chr8:144922926-144922988 | 0 | 1 | 1 | 0 | 0 | - | - | - | - |
| 498956 | CCTGCAGACCCCACAGGCCCCAGGCTCACCAGCCCCTCATGTT | chr8:145059012-145059184 | 0 | 0 | 1 | 0 | 0 | - | - | - | - |
| 498958 | GCCCCTACCCCCAAGGGGGCTACCCACAGG | chr8:145065575-145065725 | 0 | 0 | 1 | 0 | 0 | - | - | - | - |
| 498969 | CCACCTCCCCCA | chr8:145095669-145095693 | 1 | 1 | 1 | 0 | 0 | - | - | - | - |
| 499055 | CTCACCTGCAGGGTGCACCGCCCCCCTCCCCCACCC | chr8:145317610-145317785 | 0 | 0 | 1 | 0 | 0 | - | - | - | - |
| 499082 | CACCCCTCACCTGCAGGGTGCACCGCCCCCCCC | chr8:145486699-145486864 | 0 | 0 | 1 | 0 | 0 | - | - | - | - |
| 499125 | GGGGGTGCAAGGTGA | chr8:145617534-145617580 | 0 | 1 | 1 | 0 | 0 | - | - | - | - |
| 499133 | CCAGGCCCCGCCCACCTGTTCCGGTCTCCCCGCCCAGCCGTGCGGCCCCGCCCATCCTT | chr8:145638411-145638661 | 0 | 0 | 1 | 0 | 0 | - | - | - | - |
| 499163 | CCCACGGTGCGTTCCCCGCCGCCCCGCCCCACTCCCCCCGCG | chr8:145730865-145731118 | 0 | 0 | 1 | 0 | 0 | - | - | - | - |
| 499165 | AGCTGGGGGCCGCGCT | chr8:145735146-145735192 | 0 | 1 | 1 | 0 | 0 | - | - | - | - |
| 499169 | CGCTCCGCACGTCCCGCAGC | chr8:145743121-145743196 | 0 | 1 | 1 | 0 | 0 | - | - | - | - |
| 499181 | CTCACCTGGCCCCGCCCACCACCCACCTACCTGC | chr8:145806060-145806236 | 0 | 0 | 1 | 0 | 0 | - | - | - | - |
| 499312 | ACTAAAGGCTTTCCCACACTCACTACACTCATAAGGCTTCTCTCCAGTGTGAACCCTGTGGTGCTTAATGAGGTTGGAGCTCTG | chr8:146156759-146157515 | 0 | 0 | 1 | 0 | 0 | - | - | - | - |
| 499326 | TGTGAATTCTCTGATGTTGGATAAGGTGATAAGCTATGTCACTGAAGGATTTTCTCACACTCATTGGCACATACATAGGGTTTCTCTCCAG | chr8:146201761-146203526 | 0 | 0 | 1 | 0 | 0 | - | - | - | - |
| 499626 | GCAGCAACAACAGCA | chr9:2039754-2039868 | 0 | 1 | 1 | 0 | 0 | - | - | - | - |
| 500058 | TTTTCTTCACAGATTTT | chr9:4823518-4823552 | 1 | 1 | 1 | 0 | 0 | - | - | - | - |
| 501777 | CTCTGTGGCTCTCTGTCT | chr9:16727933-16727969 | 0 | 1 | 1 | 0 | 0 | - | - | - | - |
| 502363 | AGCTGG | chr9:20365693-20365723 | 1 | 1 | 1 | 0 | 0 | - | - | - | - |
| 502565 | GGCTCCATGCTGCTCCCCGCCGCC | chr9:21974794-21974865 | 0 | 1 | 1 | 0 | 0 | - | - | - | - |
| 503136 | CAGCCGCGCGTTCTCCAGACG | chr9:25678010-25678074 | 0 | 1 | 1 | 0 | 0 | - | - | - | - |
| 503431 | GCCCCG | chr9:27573482-27573545 | 0 | 1 | 0 | 0 | 0 | - | - | - | - |
| 504347 | GGTCACCTCCTCGCTCCGGGTCGACTCCTCGCTCCG | chr9:33264267-33264445 | 0 | 0 | 1 | 0 | 0 | - | - | - | - |
| 504721 | GAGGAAGAAGGGGAAGAA | chr9:35042920-35042956 | 0 | 1 | 1 | 0 | 0 | - | - | - | - |
| 504838 | CCCAGAGAGGAGGATCCA | chr9:35674151-35674241 | 0 | 1 | 1 | 0 | 0 | - | - | - | - |
| 504854 | CCAGAGCCAGGACCAGGACCAGAG | chr9:35811449-35811640 | 0 | 0 | 1 | 0 | 0 | - | - | - | - |
| 505328 | CAGCGGCAGCAG | chr9:38424355-38424449 | 0 | 1 | 1 | 0 | 0 | - | - | - | - |
| 505576 | CCCAGAGAAGACGTGGAGAGAGCTCAGAGGCTGTCCCGGAGAAGACGTGGAGAGCTCAGAGGATGT | chr9:39900514-39900792 | 0 | 0 | 1 | 0 | 0 | - | - | - | - |
| 508018 | GGAGGCCCCGAGCCGAGA | chr9:72006631-72006681 | 0 | 1 | 1 | 0 | 0 | - | - | - | - |
| 508444 | CACCTAAGAGGCGGAATAAGATAA | chr9:74674150-74674222 | 0 | 1 | 1 | 0 | 0 | - | - | - | - |
| 509287 | CATCACCACCACCCCCACACCACCACCAT | chr9:79634984-79635072 | 0 | 1 | 1 | 0 | 0 | - | - | - | - |
| 509288 | GGCGGCGGCCGC | chr9:79635226-79635274 | 0 | 1 | 1 | 0 | 0 | - | - | - | - |
| 510711 | ATATTTAACTAAACTCAATTAGTATAATTATCCTTATGTTAGA | chr9:88207279-88207486 | 0 | 0 | 1 | 0 | 0 | - | - | - | - |
| 510734 | GGCGGCGGCGGCAGCT | chr9:88356823-88356869 | 0 | 1 | 1 | 0 | 0 | - | - | - | - |
| 510952 | CCGCCCGCGCCGCCG | chr9:89561209-89561253 | 0 | 1 | 1 | 0 | 0 | - | - | - | - |
| 511454 | TCTCACCTTGCC | chr9:91660642-91660666 | 1 | 1 | 1 | 0 | 0 | - | - | - | - |
| 511500 | CAGAAAAAAACCTATGAT | chr9:91940808-91940844 | 0 | 1 | 1 | 0 | 0 | - | - | - | - |
| 511514 | AGAACAAAGAAGAAGAGGAAG | chr9:91993950-91993991 | 0 | 1 | 1 | 0 | 0 | - | - | - | - |
| 512143 | TCCTCCTCCTCCTCCTCA | chr9:95277094-95277231 | 0 | 1 | 1 | 0 | 0 | - | - | - | - |
| 512213 | TTCTCTCCTGTATGAATTTTCTGGTGCTATAATGAGATTTGACCTGTCAGTAAAGACCTTACCACACACAGAACATATAAAGGGA | chr9:95609503-95610091 | 0 | 0 | 1 | 0 | 0 | - | - | - | - |
| 512285 | TGCCCAGCCGCC | chr9:95872959-95872994 | 0 | 1 | 1 | 0 | 0 | - | - | - | - |
| 512323 | CGCTGCCCCCACAACCCA | chr9:96021657-96021821 | 0 | 0 | 1 | 0 | 0 | - | - | - | - |
| 512405 | CCCCAAGC | chr9:96422658-96422711 | 0 | 1 | 1 | 0 | 0 | - | - | - | - |
| 512428 | CACCACCCCGGCCTC | chr9:96438967-96439054 | 0 | 1 | 1 | 0 | 0 | - | - | - | - |
| 512530 | GAGTGTGGGCGAGGCTTTCGCCAGAAGGTCACTCCTCCAGACACCAGAGGACACACACAGGGGAGAAGCCCTTCCTGTGCCCT | chr9:97062803-97063647 | 0 | 0 | 1 | 0 | 0 | - | - | - | - |
| 512743 | CTCCCCTGTCGTCTTCTTCTTCTC | chr9:98278927-98278975 | 0 | 1 | 1 | 0 | 0 | - | - | - | - |
| 512880 | CAAGGACTCCACAGCCGCCCACCTCACCTGGATGATGA | chr9:99006546-99006621 | 0 | 1 | 1 | 0 | 0 | - | - | - | - |
| 513005 | CTGAGGTGTGACTTCTGACAAAAGTTTTTCCACATTCATTACATTTAAAGGGTTTCTCCCCTGTGTGAATTCTCTGATGTTCA | chr9:99521180-99522221 | 0 | 0 | 1 | 0 | 0 | - | - | - | - |
| 513012 | TTGACTTCTGACTGAAAGCTTTCCCACACTCATTACATTTATAGGGTTTCTCCCCTGTGTGAGTTCTCTGATGTACTCTGAGGA | chr9:99580242-99581409 | 0 | 0 | 1 | 0 | 0 | - | - | - | - |
| 513089 | GAGGAGGAAGAGAG | chr9:100092944-100093033 | 0 | 1 | 1 | 0 | 0 | - | - | - | - |
| 513090 | CCCCAGGATGGTCACCATCACCACCTGCCCCTCCCTTGT | chr9:100112481-100112729 | 0 | 0 | 1 | 0 | 0 | - | - | - | - |
| 513187 | GTCTTCAGGCCCAGGTATTTCTTGATACATTTCAGGTGAATATTCTTCAGACCCAGGATGTTTCTTGGTATATTTCAAGTGAATA | chr9:100692455-100693283 | 0 | 0 | 1 | 0 | 0 | - | - | - | - |
| 513328 | GCTGCGGCTGCAGGAGCGAGGA | chr9:101570228-101570293 | 0 | 1 | 1 | 0 | 0 | - | - | - | - |
| 513576 | AATAAAGCATTTAAGGAACAATTGTTATTGTTCTACTCCTACTCATTTT | chr9:103015041-103015191 | 0 | 0 | 1 | 0 | 0 | - | - | - | - |
| 513625 | GAGAGAGGCTGAGACAGTCAG | chr9:103348329-103348414 | 0 | 1 | 1 | 0 | 0 | - | - | - | - |
| 513773 | AACGGGAGAAGGAGAAGGAACGAGAAAGAG | chr9:104314821-104314997 | 0 | 0 | 1 | 0 | 0 | - | - | - | - |
| 513974 | TGCAAAGAAAGATAGCAAAAAAGGTAAAAAGGATTCAAAGAAGGGCAAAGACTCAGCAACAGAATCTGAAGATGAAAAAGGAGG | chr9:105767380-105767954 | 0 | 0 | 1 | 0 | 0 | - | - | - | - |
| 514620 | GCAGCAGCCACAGCCACCAGCACAGCCACCACCAACA | chr9:109687803-109687986 | 0 | 0 | 1 | 0 | 0 | - | - | - | - |
| 514995 | GGTGAAGGGGAGGTG | chr9:111853353-111853398 | 0 | 1 | 1 | 0 | 0 | - | - | - | - |
| 515018 | TGGTGC | chr9:111979284-111979326 | 0 | 1 | 1 | 0 | 0 | - | - | - | - |
| 515128 | CCCCCGGAGTCTCCTGGA | chr9:112811015-112811069 | 0 | 1 | 1 | 0 | 0 | - | - | - | - |
| 515436 | CTCACCAAACATCAGAGAATTCATACTGGAGAAAAACCCTATAAATGTAATGAATGTGGAAAAGCCTTTAGTGATAGTTCATC | chr9:114304574-114305330 | 0 | 0 | 1 | 0 | 0 | - | - | - | - |
| 515773 | CTTTCCCACATTCATTACACTCATAGGGTTTTTCTCCAGTATGAATTCTCTGATGTTGAATAAGGATGAGCTATGGCTGAAAG | chr9:115759807-115760563 | 0 | 0 | 1 | 0 | 0 | - | - | - | - |
| 515782 | TTTCCCACATTCATTACATTCATAAGGTTTCTCTCCAGTATGAGATCGCTGATGTACAACAAGCTGAGACTTTTGGCATTAAAGGC | chr9:115805073-115806089 | 0 | 0 | 1 | 0 | 0 | - | - | - | - |
| 517798 | CCAACTCCGCAGAGC | chr9:127566432-127566492 | 0 | 1 | 1 | 0 | 0 | - | - | - | - |
| 518208 | GGCCAGGGTGAGCTGGGGCCGGGGCCAGGGGTGGGCCTA | chr9:129456084-129456246 | 0 | 0 | 1 | 0 | 0 | - | - | - | - |
| 518291 | TGTGGCCAGGTCCTGGTACT | chr9:129870446-129870535 | 0 | 1 | 1 | 0 | 0 | - | - | - | - |
| 518343 | CACACCGGAGAGAAGCCCTACAAGTGCAGCGAGTGTGGGAAGGCCTTCAGCCAGAGTGCAACTCTCACTAAGCACCAGAGGACT | chr9:130206621-130207460 | 0 | 0 | 1 | 0 | 0 | - | - | - | - |
| 518418 | CAAGGCCACCCAGGGCCAGAGGCAGAGCTCCAGCAAGAC | chr9:130493077-130493467 | 0 | 0 | 1 | 0 | 0 | - | - | - | - |
| 518527 | TCCTCATCAACCTCGATCCTCTTCTTCA | chr9:130931343-130931397 | 0 | 1 | 1 | 0 | 0 | - | - | - | - |
| 518529 | GCTGCAGCTGCACCTGCCTTGGGCCCTGTGAATGTGCCTGGGGCTGCACCTGTGGCTGCACCTGCTTCAGCGGCTCTGCCTCCT | chr9:130941218-130941476 | 0 | 0 | 1 | 0 | 0 | - | - | - | - |
| 518536 | GCTGCTGTAACTGCT | chr9:130953024-130953130 | 0 | 1 | 1 | 0 | 0 | - | - | - | - |
| 518549 | TCCTGCAGCTCGCCCAGCTTC | chr9:131022358-131022400 | 0 | 1 | 1 | 0 | 0 | - | - | - | - |
| 518603 | CGAGCCCAGAAGGAG | chr9:131247093-131247122 | 0 | 1 | 1 | 0 | 0 | - | - | - | - |
| 518639 | ACGGTGGGACGCCCGAACCCGCCCGGCAGCC | chr9:131418670-131418827 | 0 | 0 | 1 | 0 | 0 | - | - | - | - |
| 518714 | TCACAACATGGTATGTATTTCTCTTCCAG | chr9:131750455-131750513 | 1 | 1 | 1 | 0 | 0 | - | - | - | - |
| 518751 | GCTGGTGCA | chr9:131939946-131940009 | 0 | 1 | 1 | 0 | 0 | - | - | - | - |
| 519170 | CACCGCTGCAGCTGCCCCAGGGGTTACCGGATGCAGGGCCCCAGCCTGCCCTGCCTAGGTACGGGGACACCCACCCTCTGGCCAG | chr9:133305014-133305183 | 0 | 0 | 1 | 0 | 0 | - | - | - | - |
| 519759 | GGCCCCCCCCGTGCCGCCCACGGGTGACTCCGG | chr9:135946556-135947119 | 0 | 0 | 1 | 0 | 0 | - | - | - | - |
| 519772 | CTGGAGCTGGCTCTAGTTCCAGAGCTGGCG | chr9:135983553-135983769 | 0 | 0 | 1 | 0 | 0 | - | - | - | - |
| 519862 | CCCCGCA | chr9:136223214-136223298 | 0 | 1 | 1 | 0 | 0 | - | - | - | - |
| 519876 | CCTGCTCCCTGCTGCTGCACCTCCTGGGCCAAGGTGGGTGCCAAACCAGGCCAGATGGGGTAGGGGAAGCCATGC | chr9:136265624-136265849 | 0 | 0 | 1 | 0 | 0 | - | - | - | - |
| 519877 | CAGAGG | chr9:136289463-136289498 | 0 | 1 | 1 | 0 | 0 | - | - | - | - |
| 519885 | CCGGGCCTGAG | chr9:136295020-136295078 | 0 | 1 | 1 | 0 | 0 | - | - | - | - |
| 520054 | TCCCTCCTCTCCA | chr9:136699354-136699409 | 0 | 1 | 1 | 0 | 0 | - | - | - | - |
| 520152 | CTTCTC | chr9:136905268-136905334 | 0 | 1 | 1 | 0 | 0 | - | - | - | - |
| 520522 | TACTACGAAGACCCC | chr9:137620548-137620578 | 0 | 1 | 1 | 0 | 0 | - | - | - | - |
| 520531 | CTACTACGACCC | chr9:137623421-137623445 | 1 | 1 | 1 | 0 | 0 | - | - | - | - |
| 521102 | CAGCCCTGACTC | chr9:138669143-138669193 | 0 | 1 | 1 | 0 | 0 | - | - | - | - |
| 521138 | CCGGACCCCGGCCCGCGCCC | chr9:138798772-138798848 | 0 | 1 | 1 | 0 | 0 | - | - | - | - |
| 521148 | CACACTCACTCACCACAGCC | chr9:138831288-138831528 | 0 | 0 | 1 | 0 | 0 | - | - | - | - |
| 521310 | CCTGCTGGCGGGTGAGTGGGGACGGC | chr9:139229113-139229375 | 0 | 0 | 1 | 0 | 0 | - | - | - | - |
| 521317 | CCAGGTCCAGGGCCCCCTTCTCAGGCCCAGGCTGGCGCAGGGGCAGCTTCT | chr9:139272464-139272625 | 0 | 0 | 1 | 0 | 0 | - | - | - | - |
| 521330 | GTGGGCGGCTCAGCCAGCTCTGCCCTCTGTCCCTGGCATCCGACGGCGCTCCTGACGCGGC | chr9:139312602-139313024 | 0 | 0 | 1 | 0 | 0 | - | - | - | - |
| 521334 | CAGGCCCTCACCTCTCCTCATCTCCCTCCACGCCCGCCCCCCCAGGCCCTCACCTCTCCTCATCTCCCTCCACGCCCGCCCCCC | chr9:139325681-139326358 | 0 | 0 | 1 | 0 | 0 | - | - | - | - |
| 521352 | GGCCCCGCCCCCTCCAGCACA | chr9:139407370-139407473 | 0 | 1 | 1 | 0 | 0 | - | - | - | - |
| 521479 | CCAGCA | chr9:139637300-139637342 | 0 | 1 | 1 | 0 | 0 | - | - | - | - |
| 521517 | CGGATGGGGTCAAGGTGAGCTCAGGGCCCAGGGCTGGGGGCCCCCCAGGGCCAGCCCTCTTGGATCTT | chr9:139697224-139697766 | 0 | 0 | 1 | 0 | 0 | - | - | - | - |
| 521518 | CTCTCACGTCTGGGTAATGCTCCCTGGCACTCCCAGAGAATGGCAGGAGGGTGGCTGAGC | chr9:139699896-139700015 | 0 | 1 | 1 | 0 | 0 | - | - | - | - |
| 521555 | AGCAGGTAGAAGTTGTGGGGGGGTAGAGGGA | chr9:139839905-139840029 | 0 | 1 | 1 | 0 | 0 | - | - | - | - |
| 521586 | TCCCTGGCCCAGCTCTGGGTGGTCAGCAGAGCGTGTCC | chr9:139902320-139902396 | 0 | 1 | 1 | 0 | 0 | - | - | - | - |
| 521610 | CGCCCGGCGAACCCGGTCCC | chr9:139940252-139940330 | 0 | 1 | 1 | 0 | 0 | - | - | - | - |
| 521614 | GCCACCCGCCTGTCCCTACCCACGACAAAGTTCCCA | chr9:139944496-139944748 | 0 | 0 | 1 | 0 | 0 | - | - | - | - |
| 521617 | CTCCTTCATCCTGCTCCAG | chr9:139960084-139960120 | 0 | 1 | 1 | 0 | 0 | - | - | - | - |
| 521633 | GCCCCGCGACCCCGCCCGGCGACCCC | chr9:140008505-140008694 | 0 | 0 | 1 | 0 | 0 | - | - | - | - |
| 521662 | GGGCCGCTCTTGGGGAGGTGGGCGGGGCCTCTCCAGAGCTGGGCG | chr9:140051472-140051748 | 0 | 0 | 1 | 0 | 0 | - | - | - | - |
| 521668 | CGGCGGTGCGGAGGG | chr9:140063395-140063459 | 0 | 1 | 1 | 0 | 0 | - | - | - | - |
| 521684 | CCTCTTCCT | chr9:140087004-140087078 | 0 | 1 | 1 | 0 | 0 | - | - | - | - |
| 521686 | CGCGGGCGGGGGCCGGCGGCGG | chr9:140094647-140094740 | 0 | 1 | 1 | 0 | 0 | - | - | - | - |
| 521687 | GCCGCGCCCCC | chr9:140094928-140094972 | 0 | 1 | 1 | 0 | 0 | - | - | - | - |
| 521688 | GGCTCCACTCTCGCCCG | chr9:140108128-140108250 | 0 | 1 | 1 | 0 | 0 | - | - | - | - |
| 521690 | CTGCTGCCA | chr9:140120429-140120500 | 0 | 1 | 1 | 0 | 0 | - | - | - | - |
| 521692 | TGGCCAGGGCTGACCCAGCATCCCCCACAGACTTCCCCTTCCCACCAGGCTGACTCGGCGGCTACCTGGCCCTCCTCGCGGGCGC | chr9:140128752-140128922 | 0 | 0 | 1 | 0 | 0 | - | - | - | - |
| 521698 | GGGCGGAACTGGGCGGCTGCG | chr9:140149744-140149830 | 0 | 1 | 1 | 0 | 0 | - | - | - | - |
| 521880 | CCGCGCCCTCACCTGCT | chr9:140389000-140389488 | 0 | 0 | 1 | 0 | 0 | - | - | - | - |
| 522079 | GGGCCCGGGGCGGCG | chr9:140772443-140772506 | 0 | 1 | 1 | 0 | 0 | - | - | - | - |
| 522136 | GGAGAAGGAGGCCAC | chr9:140918170-140918247 | 0 | 1 | 1 | 0 | 0 | - | - | - | - |
| 526615 | GTTCCTCCACCTCGCTCTCCTGACTCAGTG | chrX:6451799-6452156 | 0 | 0 | 1 | 0 | 0 | - | - | - | - |
| 526991 | CTGAGTCAGGAGAGCCAGGTGGAGGAACCACTGAGTCAGGAGAGCGAGGTGGAAGAACCA | chrX:7811745-7812045 | 0 | 0 | 1 | 0 | 0 | - | - | - | - |
| 527083 | TCAGTGGTTCTTCCACCTCGCTCTCCTGAC | chrX:8138119-8138239 | 0 | 1 | 1 | 0 | 0 | - | - | - | - |
| 527156 | CTGAGTCAGGAGAGCGAGGTGGAAGAACCA | chrX:8433992-8434412 | 0 | 0 | 0 | 1 | 22 | 22 | 0 | 2 | 6 |
| 527276 | TCTTCCTCTTCTCCC | chrX:8997354-8997398 | 0 | 1 | 1 | 0 | 0 | - | - | - | - |
| 527435 | CCAACCCGCGGGCCTCACGCCCTCACCCGGGCACCGAGCAGGTC | chrX:9733227-9733626 | 0 | 0 | 1 | 0 | 0 | - | - | - | - |
| 527509 | CAGCCGCGGGTCCCTAGCCTC | chrX:10085199-10085262 | 0 | 1 | 1 | 0 | 0 | - | - | - | - |
| 528231 | CACCATCTTCAAGTACCACTCTAGCCCAATATGACAACGAACTCAAAGAAAAACTATGGCTCCCAGC | chrX:15540508-15540640 | 0 | 1 | 1 | 0 | 0 | - | - | - | - |
| 528280 | GCAGCAGGAGCCGGAGCCGGAGCCGGA | chrX:15841201-15841315 | 0 | 1 | 1 | 0 | 0 | - | - | - | - |
| 528452 | CCATCAAAGCGG | chrX:16859680-16859704 | 1 | 1 | 1 | 0 | 0 | - | - | - | - |
| 528487 | GGTGGTGGCGGCGGCGGC | chrX:16964852-16965057 | 0 | 0 | 1 | 0 | 0 | - | - | - | - |
| 528703 | GCTGTGTCATAAGTGGAATTATCT | chrX:18234702-18234799 | 0 | 1 | 1 | 0 | 0 | - | - | - | - |
| 528764 | ACTCCAGGTCCGAGGC | chrX:18668629-18668678 | 0 | 1 | 1 | 0 | 0 | - | - | - | - |
| 529179 | AGAGGAGGAGGA | chrX:21627664-21627713 | 0 | 1 | 1 | 0 | 0 | - | - | - | - |
| 529206 | CCTCTTCTTCCTCTTCCT | chrX:21863392-21863464 | 0 | 1 | 1 | 0 | 0 | - | - | - | - |
| 529210 | AGCCCAGCAAAA | chrX:21875007-21875045 | 0 | 1 | 1 | 0 | 0 | - | - | - | - |
| 529550 | GTTGGACAT | chrX:24197670-24197715 | 0 | 1 | 1 | 0 | 0 | - | - | - | - |
| 529568 | CAGCAG | chrX:24329868-24329952 | 0 | 1 | 1 | 0 | 0 | - | - | - | - |
| 529578 | CTGCTG | chrX:24382357-24382567 | 0 | 0 | 1 | 0 | 0 | - | - | - | - |
| 529579 | GCAGCAGCCGCAGCATATCCAGCTCCAGACTCAGCAGTTGAGAGTCCT | chrX:24383321-24383417 | 0 | 1 | 1 | 0 | 0 | - | - | - | - |
| 529696 | CGTCGTCCTCCAGCAGCTCCTCCT | chrX:25031345-25031458 | 0 | 1 | 1 | 0 | 0 | - | - | - | - |
| 529697 | GGCCGCGGCGGCCGC | chrX:25031646-25031742 | 0 | 1 | 1 | 0 | 0 | - | - | - | - |
| 530249 | TTCTTCCTCCTCCCT | chrX:27999106-27999170 | 0 | 1 | 1 | 0 | 0 | - | - | - | - |
| 531236 | TTGGGAGGCTCCGGGCGGAGACTGGACGCCCGACGAGTC | chrX:34148710-34149439 | 0 | 0 | 1 | 0 | 0 | - | - | - | - |
| 531240 | GGGAGGCTCCGGGCGGAGATGGGACACTCCAGTCTC | chrX:34149639-34149857 | 0 | 0 | 1 | 0 | 0 | - | - | - | - |
| 531355 | GCCTCCCAAGACTCGGGTGTCCAGTCTCCGCCCAGA | chrX:34961517-34962258 | 0 | 0 | 1 | 0 | 0 | - | - | - | - |
| 531517 | GCCATGAACATCCAAAGAGGTTCCCTC | chrX:35937913-35937994 | 0 | 1 | 1 | 0 | 0 | - | - | - | - |
| 531721 | GCCTCCAGAGACTCGGAGTGTCCCATCTCCGCCCAGAGCCTCCCAAGACTGGAGTGTCCATCTCCGCCCGGA | chrX:37027049-37028927 | 0 | 0 | 1 | 0 | 0 | - | - | - | - |
| 531903 | TTTCTTCTCCTTCCCCCTCCTTTTCCC | chrX:38145088-38146065 | 0 | 0 | 1 | 0 | 0 | - | - | - | - |
| 532343 | ATTTAAACTCAATACTTATG | chrX:40572121-40572181 | 0 | 1 | 1 | 0 | 0 | - | - | - | - |
| 532789 | ACCGGCACCGGCACCAGTACCCGCACCAGT | chrX:43514348-43514468 | 0 | 1 | 1 | 0 | 0 | - | - | - | - |
| 533329 | TCTCCTGTATGAATTCTCTGATGTTTAATGAGAGTTGACTTCCCACTGAAGGCTTTCCCACAGTCTCTGCATTCATAAGGTTTC | chrX:46359290-46360533 | 0 | 0 | 1 | 0 | 0 | - | - | - | - |
| 533339 | CCTGGCCTGTACTCA | chrX:46387754-46387783 | 0 | 1 | 1 | 0 | 0 | - | - | - | - |
| 533554 | CTCATGCTCATCAGAGAACTCACACAGGGGAGAGACCCTATGAATGTAATGAATGTGGGAAACCTTTTGGCAGAGAAGGCACACA | chrX:47272084-47273005 | 0 | 0 | 1 | 0 | 0 | - | - | - | - |
| 533570 | TTCCCACATTCACTGCATTCATAAGGTTTCTCTCCGGTATGAATTCTCTGATGTATAATGAGGTCTGATTTCTGGGAGAAGGCC | chrX:47307747-47308421 | 0 | 0 | 1 | 0 | 0 | - | - | - | - |
| 533647 | ATTCATACTGGAGAGAAACCCTATATATGTGCTGAATGTGGGAAGGCCTTCACCAACAGGTCAAATCTCAATAAACACCAGACC | chrX:47775515-47776017 | 0 | 0 | 1 | 0 | 0 | - | - | - | - |
| 533667 | AAGGCTTTTCCACATTCAGTACATTCATAGGGTTTCTCTCCTGTATGAGTTCTCTGATGTATATGAGCTGTTGACTTTTCTCTG | chrX:47835665-47836929 | 0 | 0 | 1 | 0 | 0 | - | - | - | - |
| 533685 | TCTGATGTATAATGAGTGTGACTTTCCAGAGAAGGCTTTCCACATTCACTACATTCATAGGGTTTCTCTCCAGTATGAATTC | chrX:47918059-47919151 | 0 | 0 | 1 | 1 | 40 | 20 | 20 | 20 | 20 |
| 533852 | CCCTGCCTCCTTCCCTCCTCCCT | chrX:48565735-48565828 | 0 | 1 | 1 | 0 | 0 | - | - | - | - |
| 533876 | GGGGGAGCCACTCTGGACCAGACCACCTCAGAGGAGACTGTGGGAGGAGCCATGCTGGACCAGACCACCTCAGAGGAGGCTGTC | chrX:48681554-48681893 | 0 | 0 | 1 | 0 | 0 | - | - | - | - |
| 533896 | AAGTCGGACCGGAGCCATGAC | chrX:48759520-48759647 | 0 | 1 | 1 | 0 | 0 | - | - | - | - |
| 533904 | CGCCGCCGCCCACGCCCACAC | chrX:48814687-48814749 | 0 | 1 | 1 | 0 | 0 | - | - | - | - |
| 533970 | CCTCTTCCT | chrX:49076192-49076247 | 0 | 1 | 1 | 0 | 0 | - | - | - | - |
| 533985 | CGGGCAAGATGGCGGCGGCGGC | chrX:49126516-49126560 | 1 | 1 | 1 | 0 | 0 | - | - | - | - |
| 534166 | TTTGGCCTTGCAGGAGGAGCCCAGCATTGAGAAGGAGGCTGTCCTCAAGGAGCCCACTATTGACACAGAAGCTCACTTTAAGGAAAC | chrX:50053571-50054049 | 0 | 0 | 1 | 0 | 0 | - | - | - | - |
| 534192 | GGCGAT | chrX:50213063-50213093 | 0 | 1 | 1 | 0 | 0 | - | - | - | - |
| 534193 | TCTGGGGCCGGC | chrX:50213210-50213570 | 0 | 0 | 1 | 1 | 10 | 10 | 0 | 5 | 5 |
| 534205 | GGAATGATATGATTGGTCTGC | chrX:50376534-50376599 | 0 | 1 | 1 | 0 | 0 | - | - | - | - |
| 534316 | TCCTCGAGGCAGCC | chrX:51239295-51239337 | 0 | 1 | 1 | 0 | 0 | - | - | - | - |
| 534369 | CAGCCAGGCAGACCCCAC | chrX:51639685-51639991 | 0 | 0 | 1 | 0 | 0 | - | - | - | - |
| 534680 | GACAACAACGAGAACCTGAA | chrX:53115110-53115191 | 0 | 1 | 1 | 0 | 0 | - | - | - | - |
| 534681 | ATGATGGCAACGAAGGTGACAATGAAGGCAGCGATG | chrX:53115294-53115447 | 0 | 0 | 1 | 0 | 0 | - | - | - | - |
| 534778 | GTGGTGGAGGTGGCAGTG | chrX:53574767-53574836 | 0 | 1 | 1 | 0 | 0 | - | - | - | - |
| 535058 | AGGTCTCAAAGGCCACAG | chrX:54836275-54836347 | 0 | 1 | 1 | 0 | 0 | - | - | - | - |
| 535059 | AGGCTGCAGCTG | chrX:54841744-54841768 | 1 | 1 | 1 | 0 | 0 | - | - | - | - |
| 535060 | CAGTGCCAGTAC | chrX:54841928-54842012 | 0 | 1 | 1 | 0 | 0 | - | - | - | - |
| 535088 | GCATTAGCTTTGGTGGTGCACACAGCACCAGTCCAGCTTCAGCAGTACAGCCA | chrX:54955423-54956166 | 0 | 0 | 1 | 0 | 0 | - | - | - | - |
| 535096 | AGCACCAGTGCTGACTTTGGCGGTACACTCAAGCACCAGTGTCTGTTTTGGTGGCTCTCCC | chrX:54956136-54957099 | 0 | 0 | 1 | 0 | 0 | - | - | - | - |
| 535099 | TGGCTTCAGCGGTGGACCAAGCACTGGTGC | chrX:54957251-54957431 | 0 | 0 | 1 | 0 | 0 | - | - | - | - |
| 535164 | GGTGCGGGTGGGGGCGGG | chrX:55514947-55515084 | 0 | 1 | 1 | 0 | 0 | - | - | - | - |
| 536166 | GGCCTCCCTGCCATGAGCTTCTCGAGTATAGGCCTCCCTGGCATA | chrX:63411297-63411433 | 0 | 1 | 1 | 0 | 0 | - | - | - | - |
| 536167 | TCTTCTTCCTCCTCCTTAATTCCACC | chrX:63411958-63412081 | 0 | 1 | 1 | 0 | 0 | - | - | - | - |
| 536173 | CCAGAGATGCCCACAGCC | chrX:63488618-63488690 | 0 | 1 | 1 | 0 | 0 | - | - | - | - |
| 536342 | TCTTCATCA | chrX:64737988-64738051 | 0 | 1 | 1 | 0 | 0 | - | - | - | - |
| 536898 | GGCCCC | chrX:67938204-67938240 | 0 | 1 | 1 | 0 | 0 | - | - | - | - |
| 537077 | AGGACCTCCAGGACCCCA | chrX:69247716-69247885 | 0 | 0 | 1 | 0 | 0 | - | - | - | - |
| 537310 | AGCAGC | chrX:70361077-70361186 | 0 | 1 | 1 | 0 | 0 | - | - | - | - |
| 537375 | CACCAGCAGCAG | chrX:70510556-70510640 | 0 | 1 | 1 | 0 | 0 | - | - | - | - |
| 537479 | GACAACAGTGATGATTCGGAAGTTCCCGAC | chrX:70823517-70824136 | 0 | 0 | 1 | 0 | 0 | - | - | - | - |
| 537481 | GGAAAAGGAAGACAAAAACCAAAAATATAGTGGAGCCACCGA | chrX:70824358-70824527 | 0 | 0 | 1 | 0 | 0 | - | - | - | - |
| 537601 | TCCTTATCTCCTCCTCCTCCTCATTCTTGTT | chrX:71350125-71350282 | 0 | 0 | 1 | 0 | 0 | - | - | - | - |
| 537801 | TTCATGTACCATACACCTC | chrX:72433743-72433797 | 0 | 1 | 1 | 0 | 0 | - | - | - | - |
| 537802 | CCCAGCAGCAGTATCTTCACCGCACTTCCCCATCGTCCCCAAG | chrX:72434124-72434250 | 0 | 1 | 1 | 0 | 0 | - | - | - | - |
| 538011 | GAGCCGGAGCCT | chrX:73641559-73641715 | 0 | 0 | 1 | 0 | 0 | - | - | - | - |
| 538057 | GGAACT | chrX:73811706-73811790 | 0 | 1 | 1 | 0 | 0 | - | - | - | - |
| 538257 | CGCCTCTGAGGGACCGAGCACCTCCGTGCCGCCCACCCCTGCTGAGGGACCTAGCACCTCCGTGCCGCCCAC | chrX:75648499-75649579 | 0 | 0 | 1 | 1 | 40 | 40 | 0 | 20 | 20 |
| 538403 | TCTTCCTCCTCC | chrX:76907766-76907838 | 0 | 1 | 1 | 0 | 0 | - | - | - | - |
| 538851 | CCTCTTCCTCTGCCT | chrX:79932417-79932513 | 0 | 1 | 1 | 0 | 0 | - | - | - | - |
| 538911 | TCTTTCTCTTTTCCATCT | chrX:80370199-80370679 | 0 | 0 | 1 | 0 | 0 | - | - | - | - |
| 539352 | AGATTCAAAGAAGGGGAAGAA | chrX:83129071-83129136 | 0 | 1 | 1 | 0 | 0 | - | - | - | - |
| 539521 | TGGTTGGCTCATGCC | chrX:84362432-84362867 | 0 | 0 | 1 | 1 | 24 | 24 | 0 | 12 | 12 |
| 539522 | GTCTGGTTGGCTCAT | chrX:84363233-84363518 | 0 | 0 | 1 | 0 | 0 | - | - | - | - |
| 539526 | TGATTGGCTGGGGCC | chrX:84363608-84363698 | 0 | 1 | 1 | 0 | 0 | - | - | - | - |
| 539527 | TGATTGGTTCATGCC | chrX:84363947-84363992 | 0 | 1 | 1 | 0 | 0 | - | - | - | - |
| 540739 | TCTTTAGGAACTTCCTTTTCTTCAGCCTTCACCTCAGGAATT | chrX:92927584-92927752 | 0 | 0 | 1 | 0 | 0 | - | - | - | - |
| 540741 | GCTGCTGCTACTAGTGCTGCCGCTGCT | chrX:92928087-92928221 | 0 | 1 | 1 | 0 | 0 | - | - | - | - |
| 540746 | AAAAAGAGAAAGAAAG | chrX:92964684-92964715 | 0 | 1 | 1 | 0 | 0 | - | - | - | - |
| 541264 | AAATTCAAAACTGTGCAATGTCTCCATTATATAAGTAATGGAAAGGTTTCCATTTAACTTTGTTTATATGTATAGGAAGCAGTGAGAGA | chrX:96638743-96638921 | 0 | 0 | 1 | 0 | 0 | - | - | - | - |
| 541693 | CGAGCGATGGAGGCC | chrX:100088197-100088362 | 0 | 0 | 1 | 0 | 0 | - | - | - | - |
| 541776 | TCATCC | chrX:100531407-100531470 | 0 | 1 | 1 | 0 | 0 | - | - | - | - |
| 541839 | GCTGGGGAGCAGGCCAGTGGAGGGCCTGG | chrX:100747122-100747488 | 0 | 0 | 1 | 0 | 0 | - | - | - | - |
| 541842 | CAGTCCAGTGGAAGGTCCTGGACTGGGCACTGGGAAT | chrX:100748460-100748831 | 0 | 0 | 1 | 0 | 0 | - | - | - | - |
| 541844 | GGGGCT | chrX:100748997-100749194 | 0 | 0 | 1 | 0 | 0 | - | - | - | - |
| 541910 | TTCTCAACAGGCATCTTCATT | chrX:101153098-101153139 | 0 | 1 | 1 | 0 | 0 | - | - | - | - |
| 541943 | CAGAGAGTGAAGGAGAGC | chrX:101382100-101382173 | 0 | 1 | 1 | 0 | 0 | - | - | - | - |
| 541944 | CTTGCCCTCACCTTCGTGA | chrX:101396054-101396180 | 0 | 1 | 1 | 0 | 0 | - | - | - | - |
| 542020 | ACTGGGGCAAGGCCCAAAACTGAGGCCCAAGCAATG | chrX:101969932-101970183 | 0 | 0 | 1 | 0 | 0 | - | - | - | - |
| 542133 | TCCCTCATCACTCTCGCTC | chrX:102529299-102529461 | 0 | 0 | 1 | 0 | 0 | - | - | - | - |
| 542148 | CCAAAGCATGAGGAAAAG | chrX:102612660-102612733 | 0 | 1 | 1 | 0 | 0 | - | - | - | - |
| 542184 | AGTCAGAGAGGGAGGGAGG | chrX:102841826-102841936 | 0 | 1 | 1 | 0 | 0 | - | - | - | - |
| 542188 | GATGAGGGACAGCCAGGAA | chrX:102864139-102864248 | 0 | 1 | 1 | 0 | 0 | - | - | - | - |
| 542193 | AGCAGTCCTCGGAGG | chrX:102884935-102885055 | 0 | 1 | 1 | 0 | 0 | - | - | - | - |
| 542240 | CAAATACTGAAGAAAA | chrX:103219141-103219172 | 0 | 1 | 1 | 0 | 0 | - | - | - | - |
| 542290 | GGGTGGCACAGGCGCCATGGGCGGCCC | chrX:103494998-103495394 | 0 | 0 | 1 | 0 | 0 | - | - | - | - |
| 542295 | GGCTGTGGCCCCTCAGCC | chrX:103498936-103499106 | 0 | 0 | 1 | 0 | 0 | - | - | - | - |
| 542423 | GGGGCAGCCACAGCCTCCACA | chrX:104464216-104464280 | 0 | 1 | 1 | 0 | 0 | - | - | - | - |
| 542534 | CCAGGCACCTGAACAACAGCAGAGAGCACAA | chrX:105153231-105153319 | 0 | 1 | 1 | 0 | 0 | - | - | - | - |
| 542720 | CTCTTCTTCATCCTC | chrX:106143984-106144030 | 0 | 1 | 1 | 0 | 0 | - | - | - | - |
| 542751 | ATGGAATCTGAAAAT | chrX:106456105-106456180 | 0 | 1 | 1 | 0 | 0 | - | - | - | - |
| 542820 | CAGAGCCCCAGCTGCCAGCCTCGAGGC | chrX:106844668-106844799 | 0 | 1 | 1 | 0 | 0 | - | - | - | - |
| 542821 | CAGCAGCAGCAGCAACAACAA | chrX:106846417-106846523 | 0 | 1 | 1 | 0 | 0 | - | - | - | - |
| 542899 | GAGCCTGCCCCA | chrX:107320425-107320449 | 1 | 1 | 1 | 0 | 0 | - | - | - | - |
| 542900 | GAGCCA | chrX:107320521-107320557 | 0 | 1 | 1 | 0 | 0 | - | - | - | - |
| 542923 | TCCCTTTTC | chrX:107439764-107439802 | 0 | 1 | 1 | 0 | 0 | - | - | - | - |
| 542984 | CTCCTAGTAAGCTATATTTTT | chrX:107834455-107834497 | 0 | 1 | 1 | 0 | 0 | - | - | - | - |
| 543000 | CTGAAGGCTTTGAAGATGATCCCCCAC | chrX:107976942-107977024 | 0 | 1 | 1 | 0 | 0 | - | - | - | - |
| 543001 | GCCACCACCTGAGCCATG | chrX:107977819-107978098 | 0 | 0 | 1 | 0 | 0 | - | - | - | - |
| 543284 | ACTCTGGAGCATTGTCCCCATTGCTAATGCCAGCCTCAG | chrX:109694092-109694401 | 0 | 0 | 1 | 0 | 0 | - | - | - | - |
| 543285 | CAGCCTCTGAAACAATGTCCATGCCACAAATGAGAGCCC | chrX:109695397-109695670 | 0 | 0 | 1 | 0 | 0 | - | - | - | - |
| 543286 | AAATGACAGACACAGCTTCTGGAGCAATGTCCACATCGC | chrX:109695736-109696348 | 0 | 0 | 1 | 0 | 0 | - | - | - | - |
| 543288 | AGAGCTTCAGCCTCTGGACTATGTCCACACCAGCTAAGG | chrX:109696551-109696824 | 0 | 0 | 1 | 0 | 0 | - | - | - | - |
| 543383 | TGAAGAAGAAGA | chrX:110406186-110406233 | 0 | 1 | 1 | 0 | 0 | - | - | - | - |
| 543616 | GAGCCACAGCTGGAGTTG | chrX:112022311-112022518 | 0 | 0 | 1 | 0 | 0 | - | - | - | - |
| 543619 | AGCAGCAGCAGCTGG | chrX:112022606-112022726 | 0 | 1 | 1 | 0 | 0 | - | - | - | - |
| 543983 | GGCCGCTCACACTGAGGCCCACAGCAGG | chrX:114425285-114425366 | 0 | 1 | 1 | 0 | 0 | - | - | - | - |
| 543986 | GAGGCCGCTCGCCTCAATGCCAACAGCG | chrX:114425787-114426165 | 0 | 0 | 1 | 0 | 0 | - | - | - | - |
| 543992 | GAGGCCGCTCACCCAATGCCAACAGCG | chrX:114426351-114426522 | 0 | 0 | 1 | 0 | 0 | - | - | - | - |
| 543993 | GGCCGATCGCACGACACCCACAGCAGG | chrX:114426599-114426709 | 0 | 1 | 1 | 0 | 0 | - | - | - | - |
| 543999 | CCGCCACCTCCCCCTCCAGCC | chrX:114468482-114468590 | 0 | 1 | 1 | 0 | 0 | - | - | - | - |
| 544020 | GAGAGATCTCATGGCCACTCA | chrX:114540988-114541342 | 0 | 0 | 1 | 0 | 0 | - | - | - | - |
| 544960 | TTTCTCTTTTTCTTTCCATTTCTCTCCTCTCTCCTTCTC | chrX:118975122-118975197 | 0 | 1 | 1 | 0 | 0 | - | - | - | - |
| 545018 | CCGCCGCCATCTTTTTCTTCT | chrX:119211087-119211129 | 1 | 1 | 1 | 0 | 0 | - | - | - | - |
| 545025 | GCCGCCATCGCGGATCAT | chrX:119249559-119249631 | 0 | 1 | 1 | 0 | 0 | - | - | - | - |
| 545045 | GGCGGAGAAGAAAAAGATGGC | chrX:119293039-119293102 | 0 | 1 | 1 | 0 | 0 | - | - | - | - |
| 545078 | GAGGAGGAGGAAGAA | chrX:119500469-119500532 | 0 | 1 | 1 | 0 | 0 | - | - | - | - |
| 545187 | TCCTCTGAGGCCGGT | chrX:120008766-120008896 | 0 | 1 | 1 | 0 | 0 | - | - | - | - |
| 545190 | GGACCGACGCAGCCTCCT | chrX:120008917-120008971 | 0 | 1 | 1 | 0 | 0 | - | - | - | - |
| 545884 | GGGGACAGCAACAGCCACAGCCTGAAGAAAGATCCAGTGATGCCCCAGGAGATGGTCCCCCT | chrX:124454955-124456767 | 0 | 0 | 1 | 0 | 0 | - | - | - | - |
| 546700 | AAAAAGAAA | chrX:129546336-129546374 | 0 | 1 | 1 | 0 | 0 | - | - | - | - |
| 546812 | TGAAGGTCAGGCCCTTGC | chrX:130220634-130220760 | 0 | 1 | 1 | 0 | 0 | - | - | - | - |
| 547061 | TTCTGGCATCAAACTCTGAGTCAGA | chrX:131762353-131762473 | 0 | 1 | 1 | 0 | 0 | - | - | - | - |
| 547736 | GCTCCCCTCTGGGGGTGCTTCCAG | chrX:135313852-135314045 | 0 | 0 | 1 | 0 | 0 | - | - | - | - |
| 547757 | ACATGGAAACTTCAC | chrX:135441528-135441573 | 0 | 1 | 1 | 0 | 0 | - | - | - | - |
| 547801 | GCCCCAAAAAGAGGCTGAAGAAGGCT | chrX:135593261-135593454 | 0 | 0 | 1 | 0 | 0 | - | - | - | - |
| 547802 | AAGGAAGATGAAGATGCAGACGAA | chrX:135593938-135594037 | 0 | 1 | 1 | 0 | 0 | - | - | - | - |
| 547933 | TCCTTGGCCTTCCAGGCTGCCC | chrX:136112970-136113032 | 0 | 1 | 1 | 0 | 0 | - | - | - | - |
| 548501 | TCAAGTCTTCCAGATAATC | chrX:139865396-139865761 | 0 | 0 | 1 | 0 | 0 | - | - | - | - |
| 548725 | CCTTGTCCTCATCCTCAC | chrX:140984604-140984640 | 0 | 1 | 1 | 0 | 0 | - | - | - | - |
| 548726 | TCCCCAGAGTCCTCCGAGAGTCC | chrX:140984704-140984798 | 0 | 1 | 1 | 0 | 0 | - | - | - | - |
| 548729 | TCCTCAGAGTTCTCCTGAGGGGGAGGACTCCCAGTCTCCTCTCCAGAT | chrX:140993252-140993580 | 0 | 0 | 1 | 0 | 0 | - | - | - | - |
| 548731 | TTCCTCAGAGTCCTCCTCAGGGGGAGGAATCCCTATCTCCTCACTACTTTCCTCAGAGCCCTCCTCAGGGGGAGGACTCCCTGTCTCCTCACTACT | chrX:140994736-140995414 | 0 | 0 | 1 | 0 | 0 | - | - | - | - |
| 548737 | TCCTGTGAGCTCCTTCCCCTCCTCCACTTCATCGAGTCTTTCCAAGAGTTC | chrX:140995625-140995727 | 0 | 1 | 1 | 0 | 0 | - | - | - | - |
| 548738 | TCCTTGACAGACAGCGAG | chrX:140995857-140995893 | 0 | 1 | 1 | 0 | 0 | - | - | - | - |
| 548778 | GAGGACCCTGTG | chrX:141291475-141291524 | 0 | 1 | 1 | 0 | 0 | - | - | - | - |
| 549925 | TGCCACCACCACTGTCACAGCTACTGCCAT | chrX:148048348-148048495 | 0 | 0 | 1 | 0 | 0 | - | - | - | - |
| 550272 | GAAGAGGAGGAGGAA | chrX:150156324-150156384 | 0 | 1 | 1 | 0 | 0 | - | - | - | - |
| 550336 | TCTGCCTCTACCCACTCACAAG | chrX:150349249-150349545 | 0 | 0 | 1 | 0 | 0 | - | - | - | - |
| 550435 | GAAGCTGCAGGAGCAGAA | chrX:150840737-150840930 | 0 | 0 | 1 | 0 | 0 | - | - | - | - |
| 550507 | AGGAGGAGGAGGGAGAAAG | chrX:151303905-151303980 | 0 | 1 | 1 | 0 | 0 | - | - | - | - |
| 550819 | AAGGCCTTCAGCCGCAGCTCCACCTCATCGAGCACCAGCGCATCCACAGCGGCGAGAAGCCCTACGCGTGCGCCGAGTGCGGC | chrX:152686309-152686977 | 0 | 0 | 1 | 0 | 0 | - | - | - | - |
| 550849 | CAAGTTCATGCTGGTGATGGGGGTGGGGCCCCTAGGTCT | chrX:152770582-152770699 | 0 | 1 | 1 | 0 | 0 | - | - | - | - |
| 550902 | CCGCCGCCGCCCGCGCGCCCGGCCGGGCC | chrX:152953732-152954029 | 0 | 0 | 1 | 0 | 0 | - | - | - | - |
| 550913 | CTGGCCCCGGCCCTGGCTGATG | chrX:153040096-153040167 | 0 | 1 | 1 | 0 | 0 | - | - | - | - |
| 550962 | GGCGGG | chrX:153200756-153200797 | 0 | 1 | 1 | 0 | 0 | - | - | - | - |
| 551146 | GGCGGTGCA | chrX:154299804-154299840 | 0 | 1 | 1 | 0 | 0 | - | - | - | - |
| 554123 | GCTGCTGTTGCATGCAGCAGCA | chrY:2844766-2844807 | 0 | 1 | 1 | 0 | 0 | - | - | - | - |
| 556158 | TATAACATTTACTCCAAATTTCTCTCATAGATGGTTGCAAATTTCCTCTTTTAATGGAAAGATGAATGCACTGAATGAAATAAATAAGGT | chrY:14848224-14848404 | 0 | 0 | 1 | 0 | 0 | - | - | - | - |
| 600000 | CA | chr12:117799644-117799704 | 0 | 0 | 1 | 0 | 0 | - | - | - | - |

|  |  |  |  |  |  |
| --- | --- | --- | --- | --- | --- |
| VNTR ID | Position (hg19) | Population specific RU counts | RU counts in African population | RU counts in Asian population | RU counts in European population |
| 286756 | chr20:32273827-32273952 | 0 | RU1: 0.0; RU2: 5.0; RU6: 95.0; | RU1: 5.0; RU2: 7.0; RU6: 88.0; | RU1: 0.0; RU2: 7.0; RU6: 93.0; |
| 204858 | chr17:80656260-80656333 | 0 | RU2: 2.0; RU4: 90.0; RU5: 5.0; RU6: 2.0; RU7: 1.0; | RU2: 0.0; RU4: 88.0; RU5: 10.0; RU6: 2.0; RU7: 0.0; | RU2: 0.0; RU4: 92.0; RU5: 7.0; RU6: 1.0; RU7: 0.0; |
| 286833 | chr20:32664868-32664931 | 1 | RU4: 1.0; RU10: 11.0; RU11: 78.0; RU12: 5.0; RU13: 5.0; | RU4: 0.0; RU10: 16.0; RU11: 80.0; RU12: 4.0; RU13: 0.0; | RU4: 0.0; RU10: 29.0; RU11: 66.0; RU12: 4.0; RU13: 1.0; |
| 417987 | chr6:45390486-45390557 | 1 | RU3: 0.0; RU4: 100.0; | RU3: 1.0; RU4: 99.0; | RU3: 11.0; RU4: 89.0; |
| 237788 | chr19:58788582-58788654 | 1 | RU1: 50.0; RU3: 50.0; | RU1: 63.0; RU3: 37.0; | RU1: 53.0; RU3: 47.0; |
| 23469 | chr1:145353576-145353660 | 0 | RU1: 3.0; RU2: 0.0; RU4: 97.0; | RU1: 2.0; RU2: 3.0; RU4: 95.0; | RU1: 0.0; RU2: 1.0; RU4: 99.0; |
| 532789 | chrX:43514348-43514468 | 0 | RU1: 0.0; RU2: 5.1; RU3: 5.1; RU4: 42.9; RU5: 46.9; | RU1: 1.0; RU2: 2.0; RU3: 1.0; RU4: 46.0; RU5: 50.0; | RU1: 0.0; RU2: 3.0; RU3: 0.0; RU4: 42.0; RU5: 55.0; |
| 336240 | chr3:150421501-150421621 | 1 | RU2: 0.0; RU3: 3.1; RU4: 1.0; RU5: 2.1; RU6: 0.0; RU7: 1.0; RU8: 61.5; RU9: 16.7; RU10: 14.6; | RU2: 0.0; RU3: 0.0; RU4: 2.0; RU5: 3.1; RU6: 2.0; RU7: 2.0; RU8: 49.0; RU9: 9.2; RU10: 32.7; | RU2: 1.0; RU3: 1.0; RU4: 1.0; RU5: 4.0; RU6: 0.0; RU7: 1.0; RU8: 64.0; RU9: 9.0; RU10: 19.0; |
| 226968 | chr19:19431682-19431740 | 0 | RU3: 0.0; RU4: 100.0; | RU3: 0.0; RU4: 100.0; | RU3: 1.0; RU4: 99.0; |
| 25028 | chr1:152681679-152681727 | 1 | RU2: 0.0; RU3: 100.0; | RU2: 27.0; RU3: 73.0; | RU2: 32.0; RU3: 68.0; |
| 188871 | chr17:4837118-4837278 | 1 | RU1: 12.2; RU2: 5.1; RU3: 69.4; RU4: 13.3; | RU1: 6.0; RU2: 35.0; RU3: 55.0; RU4: 4.0; | RU1: 12.0; RU2: 13.0; RU3: 70.0; RU4: 5.0; |
| 287215 | chr20:34240734-34240770 | 1 | RU3: 100.0; RU4: 0.0; RU12: 0.0; | RU3: 100.0; RU4: 0.0; RU12: 0.0; | RU3: 90.0; RU4: 9.0; RU12: 1.0; |
| 205340 | chr18:657645-657756 | 1 | RU2: 0.0; RU3: 37.0; RU4: 58.0; RU5: 2.0; RU6: 3.0; | RU2: 1.0; RU3: 13.0; RU4: 86.0; RU5: 0.0; RU6: 0.0; | RU2: 0.0; RU3: 42.0; RU4: 58.0; RU5: 0.0; RU6: 0.0; |
| 25153 | chr1:153233969-153234047 | 1 | RU1: 1.0; RU2: 1.0; RU3: 1.0; RU4: 2.0; RU5: 28.0; RU6: 63.0; RU7: 3.0; RU8: 0.0; RU9: 1.0; | RU1: 1.0; RU2: 2.0; RU3: 0.0; RU4: 1.0; RU5: 51.0; RU6: 43.0; RU7: 1.0; RU8: 1.0; RU9: 0.0; | RU1: 0.0; RU2: 0.0; RU3: 0.0; RU4: 0.0; RU5: 30.0; RU6: 69.0; RU7: 0.0; RU8: 1.0; RU9: 0.0; |
| 33362 | chr1:202302073-202302137 | 0 | RU3: 1.0; RU4: 98.0; RU5: 1.0; | RU3: 0.0; RU4: 100.0; RU5: 0.0; | RU3: 0.0; RU4: 100.0; RU5: 0.0; |
| 220428 | chr19:1992924-1993023 | 0 | RU1: 1.0; RU2: 1.0; RU3: 2.0; RU4: 2.0; RU6: 91.8; RU7: 2.0; | RU1: 0.0; RU2: 0.0; RU3: 2.0; RU4: 5.0; RU6: 91.0; RU7: 2.0; | RU1: 1.0; RU2: 3.0; RU3: 0.0; RU4: 3.0; RU6: 89.0; RU7: 4.0; |
| 221807 | chr19:5131544-5131682 | 0 | RU1: 0.0; RU2: 3.6; RU3: 8.3; RU4: 1.2; RU5: 2.4; RU7: 77.4; RU8: 7.1; | RU1: 0.0; RU2: 0.0; RU3: 11.6; RU4: 1.2; RU5: 0.0; RU7: 84.9; RU8: 2.3; | RU1: 1.1; RU2: 1.1; RU3: 9.1; RU4: 1.1; RU5: 1.1; RU7: 84.1; RU8: 2.3; |
| 426091 | chr6:99282949-99283021 | 0 | RU2: 0.0; RU3: 2.0; RU4: 0.0; RU5: 2.0; RU6: 0.0; RU7: 0.0; RU8: 0.0; RU9: 0.0; RU12: 94.0; RU14: 0.0; RU15: 0.0; RU16: 1.0; RU19: 1.0; | RU2: 0.0; RU3: 0.0; RU4: 1.0; RU5: 1.0; RU6: 3.0; RU7: 1.0; RU8: 0.0; RU9: 0.0; RU12: 92.0; RU14: 1.0; RU15: 0.0; RU16: 1.0; RU19: 0.0; | RU2: 2.0; RU3: 0.0; RU4: 1.0; RU5: 4.0; RU6: 1.0; RU7: 0.0; RU8: 1.0; RU9: 1.0; RU12: 87.0; RU14: 0.0; RU15: 3.0; RU16: 0.0; RU19: 0.0; |
| 402068 | chr5:139228054-139228097 | 1 | RU3: 0.0; RU6: 28.0; RU7: 71.0; RU9: 0.0; RU10: 1.0; | RU3: 1.0; RU6: 10.0; RU7: 89.0; RU9: 0.0; RU10: 0.0; | RU3: 0.0; RU6: 6.0; RU7: 93.0; RU9: 1.0; RU10: 0.0; |
| 131749 | chr13:95363806-95363890 | 0 | RU1: 1.0; RU2: 0.0; RU3: 13.0; RU7: 86.0; RU8: 0.0; RU9: 0.0; RU10: 0.0; | RU1: 0.0; RU2: 1.0; RU3: 18.0; RU7: 80.0; RU8: 0.0; RU9: 1.0; RU10: 0.0; | RU1: 1.0; RU2: 0.0; RU3: 13.0; RU7: 84.0; RU8: 1.0; RU9: 0.0; RU10: 1.0; |
| 688 | chr1:1577063-1577168 | 1 | RU1: 0.0; RU2: 0.0; RU3: 2.0; RU5: 0.0; RU6: 1.0; RU7: 96.0; RU10: 1.0; | RU1: 1.0; RU2: 1.0; RU3: 0.0; RU5: 0.0; RU6: 10.0; RU7: 88.0; RU10: 0.0; | RU1: 0.0; RU2: 3.0; RU3: 1.0; RU5: 1.0; RU6: 15.0; RU7: 80.0; RU10: 0.0; |
| 156389 | chr15:40846182-40846238 | 0 | RU1: 0.0; RU3: 100.0; RU4: 0.0; | RU1: 1.0; RU3: 99.0; RU4: 0.0; | RU1: 2.0; RU3: 97.0; RU4: 1.0; |
| 764 | chr1:1850627-1850691 | 1 | RU1: 0.0; RU4: 0.0; RU5: 0.0; RU6: 1.0; RU7: 99.0; | RU1: 1.0; RU4: 1.0; RU5: 2.0; RU6: 52.0; RU7: 44.0; | RU1: 1.0; RU4: 1.0; RU5: 0.0; RU6: 50.0; RU7: 48.0; |
| 164627 | chr15:90023379-90023493 | 0 | RU1: 3.0; RU2: 16.0; RU3: 16.0; RU4: 5.0; RU5: 1.0; RU6: 59.0; | RU1: 4.0; RU2: 15.0; RU3: 23.0; RU4: 3.0; RU5: 0.0; RU6: 55.0; | RU1: 1.0; RU2: 13.0; RU3: 21.0; RU4: 1.0; RU5: 2.0; RU6: 62.0; |
| 82756 | chr11:72308511-72308553 | 1 | RU6: 87.0; RU7: 13.0; | RU6: 76.0; RU7: 24.0; | RU6: 46.0; RU7: 54.0; |
| 202210 | chr17:72889649-72889703 | 1 | RU1: 0.0; RU2: 2.0; RU3: 22.4; RU4: 0.0; RU5: 0.0; RU6: 26.5; RU7: 32.7; RU8: 16.3; | RU1: 1.0; RU2: 0.0; RU3: 12.0; RU4: 1.0; RU5: 1.0; RU6: 49.0; RU7: 28.0; RU8: 8.0; | RU1: 0.0; RU2: 0.0; RU3: 7.0; RU4: 0.0; RU5: 2.0; RU6: 63.0; RU7: 24.0; RU8: 4.0; |
| 172896 | chr16:21848622-21848658 | 0 | RU1: 47.0; RU2: 3.0; RU3: 50.0; | RU1: 50.0; RU2: 0.0; RU3: 50.0; | RU1: 50.0; RU2: 0.0; RU3: 50.0; |
| 25521 | chr1:155018935-155019030 | 0 | RU4: 4.0; RU6: 95.0; RU8: 1.0; | RU4: 0.0; RU6: 100.0; RU8: 0.0; | RU4: 1.0; RU6: 99.0; RU8: 0.0; |
| 189403 | chr17:7080255-7080303 | 0 | RU7: 0.0; RU8: 99.0; RU11: 1.0; | RU7: 1.0; RU8: 99.0; RU11: 0.0; | RU7: 0.0; RU8: 100.0; RU11: 0.0; |
| 17397 | chr1:85039998-85040034 | 1 | RU3: 53.0; RU4: 40.0; RU5: 6.0; RU7: 1.0; | RU3: 5.0; RU4: 95.0; RU5: 0.0; RU7: 0.0; | RU3: 30.0; RU4: 70.0; RU5: 0.0; RU7: 0.0; |
| 222217 | chr19:6222400-6222430 | 0 | RU5: 90.0; RU6: 1.0; RU7: 0.0; RU9: 0.0; RU10: 1.0; RU11: 0.0; RU12: 1.0; RU13: 5.0; RU14: 2.0; RU15: 0.0; | RU5: 88.0; RU6: 0.0; RU7: 1.0; RU9: 1.0; RU10: 2.0; RU11: 0.0; RU12: 4.0; RU13: 2.0; RU14: 1.0; RU15: 1.0; | RU5: 92.0; RU6: 0.0; RU7: 0.0; RU9: 0.0; RU10: 0.0; RU11: 3.0; RU12: 4.0; RU13: 1.0; RU14: 0.0; RU15: 0.0; |
| 189467 | chr17:7369787-7369872 | 0 | RU1: 1.0; RU2: 0.0; RU3: 0.0; RU4: 1.0; RU5: 1.0; RU6: 1.0; RU14: 94.0; RU15: 1.0; RU17: 1.0; | RU1: 1.0; RU2: 2.0; RU3: 0.0; RU4: 0.0; RU5: 2.0; RU6: 1.0; RU14: 94.0; RU15: 0.0; RU17: 0.0; | RU1: 0.0; RU2: 1.0; RU3: 1.0; RU4: 0.0; RU5: 0.0; RU6: 0.0; RU14: 98.0; RU15: 0.0; RU17: 0.0; |
| 222279 | chr19:6424561-6424665 | 1 | RU1: 18.4; RU2: 0.0; RU3: 2.0; RU4: 5.1; RU5: 0.0; RU6: 0.0; RU7: 74.5; RU8: 0.0; | RU1: 15.0; RU2: 1.0; RU3: 2.0; RU4: 3.0; RU5: 1.0; RU6: 0.0; RU7: 76.0; RU8: 2.0; | RU1: 8.0; RU2: 0.0; RU3: 2.0; RU4: 3.0; RU5: 1.0; RU6: 1.0; RU7: 85.0; RU8: 0.0; |
| 541776 | chrX:100531407-100531470 | 1 | RU5: 0.0; RU9: 17.0; RU10: 83.0; | RU5: 0.0; RU9: 8.0; RU10: 92.0; | RU5: 1.0; RU9: 19.0; RU10: 80.0; |
| 312496 | chr22:50609098-50609172 | 0 | RU1: 1.0; RU2: 3.0; RU3: 1.0; RU4: 91.0; RU5: 1.0; RU6: 3.0; | RU1: 2.0; RU2: 0.0; RU3: 0.0; RU4: 93.0; RU5: 2.0; RU6: 3.0; | RU1: 1.0; RU2: 1.0; RU3: 0.0; RU4: 93.0; RU5: 3.0; RU6: 2.0; |
| 460018 | chr7:100806630-100806656 | 0 | RU1: 0.0; RU2: 84.0; RU3: 4.0; RU4: 8.0; RU5: 4.0; RU6: 0.0; | RU1: 1.0; RU2: 81.0; RU3: 6.0; RU4: 11.0; RU5: 0.0; RU6: 1.0; | RU1: 0.0; RU2: 81.0; RU3: 8.0; RU4: 7.0; RU5: 4.0; RU6: 0.0; |
| 304384 | chr22:20918840-20918947 | 0 | RU1: 21.0; RU2: 1.0; RU7: 78.0; RU8: 0.0; | RU1: 26.0; RU2: 1.0; RU7: 71.0; RU8: 2.0; | RU1: 28.0; RU2: 0.0; RU7: 70.0; RU8: 2.0; |
| 83239 | chr11:74953173-74953257 | 0 | RU4: 21.0; RU6: 78.0; RU8: 1.0; | RU4: 18.0; RU6: 82.0; RU8: 0.0; | RU4: 19.0; RU6: 81.0; RU8: 0.0; |
| 23434 | chr1:145315795-145315879 | 0 | RU1: 3.0; RU2: 2.0; RU3: 0.0; RU4: 95.0; | RU1: 1.0; RU2: 2.0; RU3: 0.0; RU4: 97.0; | RU1: 1.0; RU2: 1.0; RU3: 1.0; RU4: 97.0; |
| 23448 | chr1:145325239-145325323 | 0 | RU1: 2.0; RU4: 98.0; | RU1: 1.0; RU4: 99.0; | RU1: 0.0; RU4: 100.0; |
| 370070 | chr4:146823380-146823428 | 0 | RU8: 50.0; RU25: 50.0; | RU8: 50.0; RU25: 50.0; | RU8: 50.0; RU25: 50.0; |
| 23459 | chr1:145339408-145339492 | 0 | RU1: 3.0; RU2: 5.0; RU4: 92.0; RU5: 0.0; | RU1: 2.0; RU2: 12.0; RU4: 86.0; RU5: 0.0; | RU1: 1.0; RU2: 5.0; RU4: 93.0; RU5: 1.0; |
| 542193 | chrX:102884935-102885055 | 0 | RU3: 33.0; RU4: 1.0; RU7: 0.0; RU8: 66.0; | RU3: 31.0; RU4: 0.0; RU7: 0.0; RU8: 69.0; | RU3: 32.0; RU4: 1.0; RU7: 4.0; RU8: 63.0; |
| 321016 | chr3:52567753-52567837 | 1 | RU3: 0.0; RU4: 4.0; RU5: 1.0; RU6: 2.0; RU8: 0.0; RU9: 1.0; RU11: 0.0; RU12: 51.0; RU13: 37.0; RU14: 4.0; | RU3: 1.0; RU4: 8.0; RU5: 0.0; RU6: 1.0; RU8: 0.0; RU9: 0.0; RU11: 25.0; RU12: 16.0; RU13: 47.0; RU14: 2.0; | RU3: 1.0; RU4: 13.0; RU5: 0.0; RU6: 0.0; RU8: 1.0; RU9: 0.0; RU11: 3.0; RU12: 45.0; RU13: 34.0; RU14: 3.0; |
| 173577 | chr16:24788366-24788471 | 1 | RU2: 0.0; RU3: 3.0; RU5: 0.0; RU7: 11.0; RU8: 86.0; RU9: 0.0; | RU2: 2.0; RU3: 0.0; RU5: 1.0; RU7: 22.0; RU8: 73.0; RU9: 2.0; | RU2: 1.0; RU3: 0.0; RU5: 0.0; RU7: 17.0; RU8: 82.0; RU9: 0.0; |
| 230935 | chr19:36212109-36212201 | 0 | RU1: 1.0; RU5: 98.0; RU6: 1.0; RU7: 0.0; | RU1: 3.0; RU5: 95.0; RU6: 1.0; RU7: 1.0; | RU1: 3.0; RU5: 95.0; RU6: 2.0; RU7: 0.0; |
| 23477 | chr1:145364570-145364654 | 1 | RU1: 3.7; RU2: 31.7; RU4: 64.6; | RU1: 0.0; RU2: 8.9; RU4: 91.1; | RU1: 1.2; RU2: 7.1; RU4: 91.7; |
| 267873 | chr2:171627478-171627540 | 0 | RU3: 0.0; RU10: 85.0; RU11: 5.0; RU12: 1.0; RU13: 0.0; RU14: 1.0; RU15: 2.0; RU16: 3.0; RU17: 1.0; RU18: 2.0; RU19: 0.0; RU20: 0.0; RU21: 0.0; | RU3: 1.0; RU10: 90.0; RU11: 0.0; RU12: 0.0; RU13: 1.0; RU14: 0.0; RU15: 1.0; RU16: 3.0; RU17: 0.0; RU18: 0.0; RU19: 1.0; RU20: 2.0; RU21: 1.0; | RU3: 0.0; RU10: 82.0; RU11: 0.0; RU12: 1.0; RU13: 2.0; RU14: 1.0; RU15: 0.0; RU16: 3.0; RU17: 1.0; RU18: 6.0; RU19: 2.0; RU20: 2.0; RU21: 0.0; |
| 271954 | chr2:196605358-196605493 | 1 | RU4: 6.8; RU5: 48.9; RU6: 44.3; | RU4: 0.0; RU5: 64.3; RU6: 35.7; | RU4: 0.0; RU5: 57.7; RU6: 42.3; |
| 191419 | chr17:16394997-16395116 | 1 | RU4: 44.9; RU5: 0.0; RU7: 53.1; RU8: 2.0; | RU4: 44.0; RU5: 2.0; RU7: 54.0; RU8: 0.0; | RU4: 35.0; RU5: 1.0; RU7: 64.0; RU8: 0.0; |
| 75386 | chr11:33721989-33722096 | 0 | RU1: 1.0; RU2: 0.0; RU8: 99.0; | RU1: 3.0; RU2: 1.0; RU8: 96.0; | RU1: 1.0; RU2: 0.0; RU8: 99.0; |
| 222891 | chr19:7591489-7591615 | 0 | RU3: 2.0; RU4: 3.0; RU5: 1.0; RU6: 0.0; RU7: 94.0; | RU3: 1.0; RU4: 2.0; RU5: 1.0; RU6: 1.0; RU7: 95.0; | RU3: 5.0; RU4: 2.0; RU5: 0.0; RU6: 0.0; RU7: 93.0; |
| 468671 | chr7:150694257-150694392 | 1 | RU1: 1.0; RU2: 1.0; RU3: 0.0; RU4: 44.9; RU5: 52.0; RU6: 1.0; | RU1: 0.0; RU2: 2.0; RU3: 0.0; RU4: 16.0; RU5: 82.0; RU6: 0.0; | RU1: 0.0; RU2: 1.0; RU3: 1.0; RU4: 15.0; RU5: 83.0; RU6: 0.0; |
| 175069 | chr16:30236681-30236717 | 1 | RU1: 17.0; RU2: 39.0; RU3: 42.0; RU4: 2.0; | RU1: 25.0; RU2: 27.0; RU3: 16.0; RU4: 32.0; | RU1: 34.0; RU2: 22.0; RU3: 36.0; RU4: 8.0; |
| 280421 | chr2:240964583-240964673 | 1 | RU8: 1.0; RU9: 22.0; RU10: 0.0; RU11: 77.0; RU13: 0.0; | RU8: 1.0; RU9: 30.0; RU10: 1.0; RU11: 68.0; RU13: 0.0; | RU8: 1.0; RU9: 17.0; RU10: 0.0; RU11: 81.0; RU13: 1.0; |
| 182150 | chr16:71956506-71956541 | 1 | RU5: 10.0; RU6: 77.0; RU7: 13.0; | RU5: 22.0; RU6: 77.0; RU7: 1.0; | RU5: 46.0; RU6: 54.0; RU7: 0.0; |
| 337884 | chr3:161220971-161221096 | 1 | RU2: 0.0; RU6: 1.2; RU9: 11.9; RU10: 0.0; RU12: 4.8; RU13: 0.0; RU14: 82.1; | RU2: 1.1; RU6: 0.0; RU9: 15.2; RU10: 0.0; RU12: 0.0; RU13: 0.0; RU14: 83.7; | RU2: 0.0; RU6: 0.0; RU9: 16.2; RU10: 2.7; RU12: 5.4; RU13: 6.8; RU14: 68.9; |
| 247798 | chr2:48982755-48982809 | 1 | RU2: 1.0; RU6: 75.0; RU7: 14.0; RU16: 10.0; | RU2: 0.0; RU6: 83.0; RU7: 2.0; RU16: 15.0; | RU2: 0.0; RU6: 63.0; RU7: 28.0; RU16: 9.0; |
| 321583 | chr3:56591277-56591317 | 1 | RU2: 39.0; RU3: 61.0; | RU2: 47.0; RU3: 53.0; | RU2: 16.0; RU3: 84.0; |
| 67632 | chr10:133954073-133954190 | 1 | RU1: 30.0; RU2: 5.0; RU3: 32.0; RU4: 33.0; | RU1: 36.0; RU2: 5.0; RU3: 29.0; RU4: 30.0; | RU1: 26.0; RU2: 1.0; RU3: 65.0; RU4: 8.0; |
| 280629 | chr2:241403957-241404043 | 1 | RU2: 59.0; RU3: 2.0; RU4: 38.0; RU6: 1.0; | RU2: 30.0; RU3: 0.0; RU4: 70.0; RU6: 0.0; | RU2: 62.0; RU3: 0.0; RU4: 38.0; RU6: 0.0; |
| 223309 | chr19:8551035-8551134 | 0 | RU4: 50.0; RU5: 1.0; RU7: 49.0; RU8: 0.0; | RU4: 51.0; RU5: 0.0; RU7: 48.0; RU8: 1.0; | RU4: 51.0; RU5: 0.0; RU7: 49.0; RU8: 0.0; |
| 231540 | chr19:38795547-38795596 | 1 | RU3: 97.0; RU4: 3.0; RU5: 0.0; | RU3: 57.0; RU4: 42.0; RU5: 1.0; | RU3: 97.0; RU4: 3.0; RU5: 0.0; |
| 214738 | chr18:60190764-60190850 | 0 | RU1: 0.0; RU2: 1.0; RU4: 99.0; | RU1: 0.0; RU2: 0.0; RU4: 100.0; | RU1: 1.0; RU2: 0.0; RU4: 99.0; |
| 198904 | chr17:56833457-56833517 | 1 | RU1: 0.0; RU4: 0.0; RU10: 25.0; RU11: 71.0; RU12: 4.0; | RU1: 0.0; RU4: 0.0; RU10: 48.0; RU11: 51.0; RU12: 1.0; | RU1: 1.0; RU4: 1.0; RU10: 37.0; RU11: 60.0; RU12: 1.0; |
| 403754 | chr5:149777917-149777961 | 0 | RU3: 77.0; RU10: 23.0; | RU3: 81.0; RU10: 19.0; | RU3: 78.0; RU10: 22.0; |
| 477537 | chr8:24775684-24775822 | 0 | RU1: 1.0; RU2: 13.0; RU7: 86.0; | RU1: 0.0; RU2: 4.0; RU7: 96.0; | RU1: 0.0; RU2: 12.2; RU7: 87.8; |
| 296680 | chr21:22881119-22881171 | 1 | RU5: 36.0; RU6: 13.0; RU7: 1.0; RU16: 1.0; RU17: 49.0; | RU5: 28.0; RU6: 23.0; RU7: 0.0; RU16: 0.0; RU17: 49.0; | RU5: 14.0; RU6: 37.0; RU7: 0.0; RU16: 1.0; RU17: 48.0; |
| 512428 | chr9:96438967-96439054 | 1 | RU1: 0.0; RU2: 0.0; RU6: 19.0; RU7: 81.0; | RU1: 1.0; RU2: 0.0; RU6: 52.0; RU7: 47.0; | RU1: 0.0; RU2: 1.0; RU6: 33.0; RU7: 66.0; |
| 223936 | chr19:10229726-10229768 | 1 | RU1: 19.0; RU2: 81.0; | RU1: 35.0; RU2: 65.0; | RU1: 56.0; RU2: 44.0; |
| 68302 | chr10:134755856-134755961 | 1 | RU2: 1.0; RU3: 62.0; RU4: 37.0; | RU2: 1.0; RU3: 49.0; RU4: 50.0; | RU2: 0.0; RU3: 66.0; RU4: 34.0; |
| 267422 | chr2:169103796-169103845 | 1 | RU2: 0.0; RU4: 0.0; RU5: 0.0; RU6: 1.0; RU8: 71.0; RU9: 28.0; RU12: 0.0; | RU2: 1.0; RU4: 1.0; RU5: 0.0; RU6: 0.0; RU8: 79.0; RU9: 19.0; RU12: 0.0; | RU2: 0.0; RU4: 0.0; RU5: 4.0; RU6: 0.0; RU8: 23.0; RU9: 72.0; RU12: 1.0; |
| 336352 | chr3:151134102-151134207 | 0 | RU2: 3.0; RU3: 0.0; RU4: 1.0; RU6: 0.0; RU8: 12.0; RU9: 1.0; RU12: 83.0; | RU2: 4.0; RU3: 0.0; RU4: 3.0; RU6: 0.0; RU8: 12.0; RU9: 0.0; RU12: 81.0; | RU2: 4.0; RU3: 1.0; RU4: 0.0; RU6: 1.0; RU8: 15.0; RU9: 0.0; RU12: 79.0; |
| 191377 | chr17:16256663-16256699 | 1 | RU2: 1.0; RU3: 1.0; RU4: 56.0; RU5: 42.0; RU6: 0.0; | RU2: 0.0; RU3: 0.0; RU4: 18.0; RU5: 82.0; RU6: 0.0; | RU2: 0.0; RU3: 0.0; RU4: 50.0; RU5: 49.0; RU6: 1.0; |
| 281492 | chr20:590688-590755 | 0 | RU1: 1.0; RU2: 20.0; RU6: 78.0; RU8: 1.0; RU9: 0.0; | RU1: 2.0; RU2: 21.0; RU6: 76.0; RU8: 0.0; RU9: 1.0; | RU1: 1.0; RU2: 16.0; RU6: 83.0; RU8: 0.0; RU9: 0.0; |
| 256976 | chr2:105472043-105472134 | 0 | RU1: 1.0; RU2: 1.0; RU3: 0.0; RU4: 0.0; RU5: 0.0; RU6: 78.0; RU7: 5.0; RU8: 10.0; RU9: 0.0; RU10: 5.0; | RU1: 0.0; RU2: 2.0; RU3: 1.0; RU4: 1.0; RU5: 3.0; RU6: 83.0; RU7: 4.0; RU8: 6.0; RU9: 0.0; RU10: 0.0; | RU1: 0.0; RU2: 0.0; RU3: 0.0; RU4: 0.0; RU5: 2.0; RU6: 79.0; RU7: 12.0; RU8: 5.0; RU9: 2.0; RU10: 0.0; |
| 369157 | chr4:140811057-140811176 | 1 | RU4: 11.0; RU11: 1.0; RU12: 0.0; RU13: 4.0; RU14: 14.0; RU15: 5.0; RU16: 1.0; RU17: 1.0; RU18: 43.0; RU19: 11.0; RU20: 8.0; RU21: 0.0; RU25: 1.0; | RU4: 24.0; RU11: 0.0; RU12: 1.0; RU13: 1.0; RU14: 8.0; RU15: 2.0; RU16: 0.0; RU17: 0.0; RU18: 49.0; RU19: 5.0; RU20: 10.0; RU21: 0.0; RU25: 0.0; | RU4: 14.0; RU11: 2.0; RU12: 0.0; RU13: 2.0; RU14: 14.0; RU15: 1.0; RU16: 0.0; RU17: 1.0; RU18: 55.0; RU19: 2.0; RU20: 8.0; RU21: 1.0; RU25: 0.0; |
| 68789 | chr10:135202324-135202464 | 1 | RU1: 1.0; RU3: 46.9; RU4: 45.9; RU5: 6.1; | RU1: 0.0; RU3: 91.0; RU4: 9.0; RU5: 0.0; | RU1: 0.0; RU3: 72.0; RU4: 26.0; RU5: 2.0; |
| 175230 | chr16:30977014-30977110 | 0 | RU2: 0.0; RU5: 99.0; RU6: 1.0; | RU2: 3.0; RU5: 97.0; RU6: 0.0; | RU2: 0.0; RU5: 100.0; RU6: 0.0; |
| 511138 | chr9:90534156-90534211 | 1 | RU1: 0.0; RU2: 0.0; RU3: 12.0; RU4: 88.0; | RU1: 1.0; RU2: 8.0; RU3: 22.0; RU4: 69.0; | RU1: 0.0; RU2: 0.0; RU3: 50.0; RU4: 50.0; |
| 117940 | chr12:132414675-132414813 | 0 | RU1: 0.0; RU2: 2.0; RU3: 98.0; | RU1: 0.0; RU2: 0.0; RU3: 100.0; | RU1: 1.0; RU2: 0.0; RU3: 99.0; |
| 167103 | chr16:311953-312091 | 1 | RU2: 62.0; RU3: 38.0; | RU2: 45.0; RU3: 55.0; | RU2: 19.0; RU3: 81.0; |
| 167180 | chr16:447095-447232 | 1 | RU3: 3.1; RU4: 0.0; RU5: 0.0; RU6: 92.7; RU7: 4.2; | RU3: 1.2; RU4: 0.0; RU5: 0.0; RU6: 33.8; RU7: 65.0; | RU3: 1.2; RU4: 1.2; RU5: 1.2; RU6: 37.2; RU7: 59.3; |
| 139825 | chr14:38679763-38679811 | 1 | RU1: 6.0; RU2: 78.0; RU3: 15.0; RU4: 1.0; | RU1: 0.0; RU2: 90.0; RU3: 10.0; RU4: 0.0; | RU1: 0.0; RU2: 79.0; RU3: 21.0; RU4: 0.0; |
| 331173 | chr3:121351293-121351335 | 1 | RU7: 80.0; RU9: 17.0; RU12: 3.0; | RU7: 43.0; RU9: 57.0; RU12: 0.0; | RU7: 80.0; RU9: 20.0; RU12: 0.0; |
| 282094 | chr20:3765776-3765914 | 1 | RU1: 4.3; RU2: 9.8; RU3: 1.1; RU4: 1.1; RU5: 17.4; RU6: 1.1; RU7: 0.0; RU8: 60.9; RU9: 4.3; | RU1: 3.3; RU2: 8.7; RU3: 2.2; RU4: 0.0; RU5: 12.0; RU6: 1.1; RU7: 1.1; RU8: 71.7; RU9: 0.0; | RU1: 8.9; RU2: 7.8; RU3: 4.4; RU4: 1.1; RU5: 3.3; RU6: 0.0; RU7: 1.1; RU8: 71.1; RU9: 2.2; |
| 28158 | chr1:171501752-171501878 | 0 | RU1: 0.0; RU2: 4.0; RU4: 11.0; RU7: 76.0; RU8: 9.0; | RU1: 0.0; RU2: 2.0; RU4: 14.3; RU7: 77.6; RU8: 6.1; | RU1: 1.0; RU2: 1.0; RU4: 14.0; RU7: 71.0; RU8: 13.0; |
| 69205 | chr11:627024-627091 | 0 | RU1: 0.0; RU4: 94.0; RU5: 3.0; RU6: 1.0; RU7: 2.0; | RU1: 1.0; RU4: 93.0; RU5: 3.0; RU6: 1.0; RU7: 2.0; | RU1: 0.0; RU4: 94.0; RU5: 2.0; RU6: 2.0; RU7: 2.0; |
| 503431 | chr9:27573482-27573545 | 1 | RU10: 39.0; RU11: 5.0; RU12: 19.0; RU13: 4.0; RU14: 8.0; RU15: 8.0; RU16: 7.0; RU17: 5.0; RU18: 4.0; RU19: 0.0; RU20: 0.0; RU21: 0.0; RU25: 1.0; | RU10: 53.0; RU11: 0.0; RU12: 1.0; RU13: 0.0; RU14: 10.0; RU15: 18.0; RU16: 7.0; RU17: 3.0; RU18: 4.0; RU19: 1.0; RU20: 1.0; RU21: 1.0; RU25: 1.0; | RU10: 63.0; RU11: 0.0; RU12: 4.0; RU13: 10.0; RU14: 4.0; RU15: 0.0; RU16: 10.0; RU17: 1.0; RU18: 4.0; RU19: 0.0; RU20: 1.0; RU21: 2.0; RU25: 1.0; |
| 459375 | chr7:98507807-98507906 | 0 | RU4: 95.9; RU5: 4.1; | RU4: 91.0; RU5: 9.0; | RU4: 89.0; RU5: 11.0; |
| 519862 | chr9:136223214-136223298 | 1 | RU1: 0.0; RU8: 0.0; RU9: 38.0; RU10: 34.0; RU11: 18.0; RU12: 10.0; | RU1: 1.0; RU8: 0.0; RU9: 64.0; RU10: 1.0; RU11: 34.0; RU12: 0.0; | RU1: 0.0; RU8: 1.0; RU9: 35.0; RU10: 16.0; RU11: 48.0; RU12: 0.0; |
| 257861 | chr2:110372086-110372209 | 0 | RU2: 2.0; RU3: 1.0; RU4: 12.0; RU7: 85.0; RU8: 0.0; | RU2: 2.0; RU3: 1.0; RU4: 13.0; RU7: 84.0; RU8: 0.0; | RU2: 1.0; RU3: 0.0; RU4: 18.0; RU7: 80.0; RU8: 1.0; |
| 355567 | chr4:54319169-54319278 | 0 | RU6: 61.0; RU8: 25.0; RU9: 14.0; | RU6: 57.0; RU8: 29.0; RU9: 14.0; | RU6: 59.0; RU8: 30.0; RU9: 11.0; |
| 69523 | chr11:1216370-1216459 | 0 | RU2: 2.0; RU4: 1.0; RU6: 94.0; RU8: 3.0; | RU2: 0.0; RU4: 0.0; RU6: 100.0; RU8: 0.0; | RU2: 0.0; RU4: 0.0; RU6: 99.0; RU8: 1.0; |
| 225226 | chr19:14200845-14200954 | 0 | RU1: 0.0; RU2: 0.0; RU3: 15.6; RU4: 0.0; RU5: 12.5; RU6: 71.9; | RU1: 1.3; RU2: 1.3; RU3: 6.6; RU4: 0.0; RU5: 14.5; RU6: 76.3; | RU1: 1.3; RU2: 0.0; RU3: 7.7; RU4: 2.6; RU5: 14.1; RU6: 74.4; |
| 200671 | chr17:65955752-65955806 | 1 | RU6: 85.0; RU7: 14.0; RU8: 1.0; | RU6: 32.0; RU7: 68.0; RU8: 0.0; | RU6: 85.0; RU7: 14.0; RU8: 1.0; |
| 151544 | chr14:105055118-105055145 | 1 | RU2: 78.0; RU3: 22.0; | RU2: 80.0; RU3: 20.0; | RU2: 40.0; RU3: 60.0; |
| 443051 | chr7:11871457-11871531 | 1 | RU3: 1.0; RU4: 99.0; RU5: 0.0; | RU3: 10.0; RU4: 89.0; RU5: 1.0; | RU3: 1.0; RU4: 99.0; RU5: 0.0; |
| 151578 | chr14:105173862-105173892 | 1 | RU3: 10.0; RU4: 10.0; RU5: 68.0; RU7: 1.0; RU8: 1.0; RU9: 0.0; RU10: 2.0; RU11: 1.0; RU12: 2.0; RU13: 2.0; RU14: 2.0; RU15: 1.0; | RU3: 6.0; RU4: 3.0; RU5: 80.0; RU7: 1.0; RU8: 0.0; RU9: 0.0; RU10: 0.0; RU11: 3.0; RU12: 1.0; RU13: 3.0; RU14: 3.0; RU15: 0.0; | RU3: 20.0; RU4: 10.0; RU5: 56.0; RU7: 0.0; RU8: 0.0; RU9: 1.0; RU10: 1.0; RU11: 0.0; RU12: 3.0; RU13: 6.0; RU14: 3.0; RU15: 0.0; |
| 135212 | chr13:113201813-113201933 | 1 | RU1: 0.0; RU2: 2.0; RU3: 0.0; RU4: 1.0; RU5: 1.0; RU6: 5.0; RU7: 81.0; RU8: 9.0; RU10: 1.0; | RU1: 2.0; RU2: 3.0; RU3: 1.0; RU4: 3.0; RU5: 2.0; RU6: 0.0; RU7: 23.0; RU8: 66.0; RU10: 0.0; | RU1: 2.0; RU2: 2.0; RU3: 1.0; RU4: 9.0; RU5: 0.0; RU6: 4.0; RU7: 20.0; RU8: 62.0; RU10: 0.0; |
| 512143 | chr9:95277094-95277231 | 1 | RU1: 0.0; RU3: 1.0; RU4: 0.0; RU5: 16.0; RU7: 3.0; RU8: 80.0; | RU1: 0.0; RU3: 0.0; RU4: 0.0; RU5: 29.6; RU7: 1.0; RU8: 69.4; | RU1: 1.0; RU3: 0.0; RU4: 1.0; RU5: 24.0; RU7: 1.0; RU8: 73.0; |
| 168123 | chr16:2499760-2499831 | 1 | RU4: 1.0; RU6: 2.0; RU7: 2.0; RU8: 2.0; RU9: 87.0; RU10: 4.0; RU11: 2.0; | RU4: 0.0; RU6: 1.0; RU7: 2.0; RU8: 8.0; RU9: 87.0; RU10: 2.0; RU11: 0.0; | RU4: 0.0; RU6: 1.0; RU7: 0.0; RU8: 36.0; RU9: 59.0; RU10: 4.0; RU11: 0.0; |
| 151787 | chr14:105617512-105617625 | 1 | RU3: 1.0; RU4: 35.0; RU5: 0.0; RU6: 20.0; RU7: 43.0; RU8: 1.0; | RU3: 0.0; RU4: 27.0; RU5: 0.0; RU6: 38.0; RU7: 35.0; RU8: 0.0; | RU3: 0.0; RU4: 26.0; RU5: 1.0; RU6: 40.0; RU7: 33.0; RU8: 0.0; |
| 61706 | chr10:102763414-102763452 | 0 | RU3: 97.0; RU12: 3.0; | RU3: 99.0; RU12: 1.0; | RU3: 97.0; RU12: 3.0; |
| 61708 | chr10:102770293-102770380 | 1 | RU12: 23.0; RU13: 3.0; RU15: 65.0; RU16: 9.0; | RU12: 29.0; RU13: 0.0; RU15: 67.0; RU16: 4.0; | RU12: 13.0; RU13: 10.0; RU15: 36.0; RU16: 41.0; |
| 225594 | chr19:15355319-15355385 | 0 | RU1: 1.0; RU3: 79.0; RU4: 18.0; RU5: 2.0; | RU1: 0.0; RU3: 88.0; RU4: 12.0; RU5: 0.0; | RU1: 1.0; RU3: 85.0; RU4: 14.0; RU5: 0.0; |
| 135912 | chr13:114307511-114307641 | 0 | RU1: 3.0; RU2: 0.0; RU3: 1.0; RU4: 2.0; RU5: 2.0; RU6: 90.0; RU7: 2.0; | RU1: 0.0; RU2: 0.0; RU3: 1.0; RU4: 2.0; RU5: 1.0; RU6: 96.0; RU7: 0.0; | RU1: 3.0; RU2: 3.0; RU3: 0.0; RU4: 2.0; RU5: 4.0; RU6: 88.0; RU7: 0.0; |
| 233957 | chr19:47778107-47778210 | 0 | RU1: 0.0; RU2: 1.0; RU3: 1.0; RU4: 5.0; RU5: 89.0; RU6: 4.0; | RU1: 1.0; RU2: 0.0; RU3: 1.0; RU4: 0.0; RU5: 93.0; RU6: 5.0; | RU1: 1.0; RU2: 0.0; RU3: 3.0; RU4: 0.0; RU5: 91.0; RU6: 5.0; |
| 487964 | chr8:86089721-86089818 | 0 | RU4: 10.0; RU5: 1.0; RU7: 89.0; | RU4: 9.0; RU5: 3.0; RU7: 88.0; | RU4: 6.0; RU5: 1.0; RU7: 93.0; |
| 86610 | chr11:95825822-95825894 | 0 | RU2: 1.0; RU3: 0.0; RU6: 98.0; RU8: 1.0; | RU2: 0.0; RU3: 1.0; RU6: 99.0; RU8: 0.0; | RU2: 0.0; RU3: 0.0; RU6: 100.0; RU8: 0.0; |
| 62095 | chr10:104629254-104629362 | 1 | RU1: 0.0; RU2: 38.0; RU3: 59.0; RU4: 3.0; | RU1: 1.0; RU2: 59.0; RU3: 36.0; RU4: 4.0; | RU1: 2.0; RU2: 36.0; RU3: 62.0; RU4: 0.0; |
| 119440 | chr13:21562479-21562541 | 1 | RU4: 0.0; RU5: 74.0; RU6: 26.0; | RU4: 1.0; RU5: 60.0; RU6: 39.0; | RU4: 0.0; RU5: 49.0; RU6: 51.0; |
| 184992 | chr16:85689982-85690108 | 1 | RU1: 0.0; RU2: 12.0; RU3: 1.0; RU4: 3.0; RU5: 14.0; RU8: 1.0; RU11: 1.0; RU15: 1.0; RU17: 1.0; RU18: 0.0; RU19: 2.0; RU20: 30.0; RU21: 32.0; RU22: 2.0; | RU1: 2.1; RU2: 12.5; RU3: 0.0; RU4: 3.1; RU5: 12.5; RU8: 2.1; RU11: 0.0; RU15: 0.0; RU17: 0.0; RU18: 0.0; RU19: 1.0; RU20: 6.2; RU21: 59.4; RU22: 1.0; | RU1: 0.0; RU2: 7.1; RU3: 0.0; RU4: 2.0; RU5: 20.4; RU8: 1.0; RU11: 0.0; RU15: 0.0; RU17: 0.0; RU18: 1.0; RU19: 1.0; RU20: 2.0; RU21: 63.3; RU22: 2.0; |
| 70309 | chr11:2428307-2428367 | 1 | RU1: 0.0; RU2: 99.0; RU3: 1.0; | RU1: 40.0; RU2: 60.0; RU3: 0.0; | RU1: 29.0; RU2: 71.0; RU3: 0.0; |
| 222004 | chr19:5594036-5594138 | 0 | RU2: 2.0; RU4: 1.0; RU7: 97.0; | RU2: 1.0; RU4: 0.0; RU7: 99.0; | RU2: 0.0; RU4: 2.0; RU7: 98.0; |
| 4992 | chr1:16262471-16262525 | 0 | RU3: 90.0; RU4: 10.0; | RU3: 87.0; RU4: 13.0; | RU3: 90.0; RU4: 10.0; |
| 308206 | chr22:37906308-37906345 | 1 | RU4: 1.0; RU5: 41.0; RU6: 57.0; RU7: 1.0; | RU4: 0.0; RU5: 28.0; RU6: 72.0; RU7: 0.0; | RU4: 0.0; RU5: 21.0; RU6: 74.0; RU7: 5.0; |
| 5130 | chr1:16891324-16891399 | 0 | RU2: 50.0; RU5: 50.0; | RU2: 50.0; RU5: 50.0; | RU2: 50.0; RU5: 50.0; |
| 308243 | chr22:38055133-38055223 | 0 | RU1: 8.0; RU3: 3.0; RU5: 1.0; RU6: 86.0; RU7: 2.0; | RU1: 5.0; RU3: 1.0; RU5: 0.0; RU6: 91.0; RU7: 3.0; | RU1: 7.0; RU3: 3.0; RU5: 0.0; RU6: 90.0; RU7: 0.0; |
| 308285 | chr22:38201892-38202012 | 0 | RU2: 3.0; RU3: 31.0; RU5: 11.0; RU7: 55.0; | RU2: 8.0; RU3: 24.0; RU5: 12.0; RU7: 56.0; | RU2: 6.0; RU3: 23.0; RU5: 12.0; RU7: 59.0; |
| 193635 | chr17:29718790-29718879 | 0 | RU1: 3.0; RU2: 2.0; RU3: 20.0; RU4: 1.0; RU8: 73.0; RU12: 1.0; | RU1: 5.0; RU2: 0.0; RU3: 23.0; RU4: 0.0; RU8: 72.0; RU12: 0.0; | RU1: 3.0; RU2: 0.0; RU3: 19.0; RU4: 0.0; RU8: 78.0; RU12: 0.0; |
| 234603 | chr19:49644770-49644876 | 1 | RU1: 1.0; RU2: 0.0; RU3: 2.0; RU4: 21.0; RU5: 3.0; RU6: 0.0; RU7: 24.0; RU8: 48.0; RU9: 1.0; | RU1: 0.0; RU2: 1.0; RU3: 1.0; RU4: 25.0; RU5: 0.0; RU6: 0.0; RU7: 51.0; RU8: 22.0; RU9: 0.0; | RU1: 0.0; RU2: 4.0; RU3: 3.0; RU4: 21.0; RU5: 1.0; RU6: 1.0; RU7: 34.0; RU8: 36.0; RU9: 0.0; |
| 308334 | chr22:38483149-38483221 | 1 | RU4: 68.0; RU5: 32.0; | RU4: 84.0; RU5: 16.0; | RU4: 58.0; RU5: 42.0; |
| 308337 | chr22:38494023-38494081 | 1 | RU2: 12.0; RU3: 88.0; RU4: 0.0; | RU2: 33.0; RU3: 61.0; RU4: 6.0; | RU2: 39.0; RU3: 56.0; RU4: 5.0; |
| 152843 | chr15:20746877-20747003 | 1 | RU1: 3.1; RU2: 7.3; RU3: 6.2; RU4: 12.5; RU5: 11.5; RU6: 8.3; RU7: 32.3; RU8: 18.7; | RU1: 4.2; RU2: 3.1; RU3: 8.3; RU4: 6.2; RU5: 18.7; RU6: 7.3; RU7: 41.7; RU8: 10.4; | RU1: 4.7; RU2: 5.8; RU3: 2.3; RU4: 14.0; RU5: 19.8; RU6: 12.8; RU7: 26.7; RU8: 14.0; |
| 234809 | chr19:50154205-50154309 | 0 | RU1: 2.0; RU3: 1.0; RU4: 70.0; RU5: 23.0; RU6: 4.0; | RU1: 0.0; RU3: 2.0; RU4: 75.0; RU5: 16.0; RU6: 7.0; | RU1: 1.0; RU3: 2.0; RU4: 75.0; RU5: 21.0; RU6: 1.0; |
| 505328 | chr9:38424355-38424449 | 0 | RU1: 1.0; RU8: 99.0; | RU1: 1.0; RU8: 99.0; | RU1: 0.0; RU8: 100.0; |
| 300260 | chr21:40585353-40585415 | 1 | RU2: 32.0; RU3: 59.0; RU4: 9.0; | RU2: 37.0; RU3: 54.0; RU4: 9.0; | RU2: 37.0; RU3: 44.0; RU4: 19.0; |
| 415300 | chr6:30995818-30995926 | 0 | RU1: 1.0; RU3: 5.0; RU4: 2.0; RU5: 40.0; RU7: 46.0; RU8: 3.0; RU9: 3.0; | RU1: 1.0; RU3: 4.0; RU4: 2.0; RU5: 41.0; RU7: 47.0; RU8: 2.0; RU9: 3.0; | RU1: 0.0; RU3: 7.0; RU4: 1.0; RU5: 44.0; RU7: 46.0; RU8: 0.0; RU9: 2.0; |
| 218711 | chr18:77104345-77104472 | 1 | RU1: 28.0; RU3: 72.0; | RU1: 18.0; RU3: 82.0; | RU1: 22.0; RU3: 78.0; |
| 235102 | chr19:50985470-50985518 | 0 | RU2: 0.0; RU8: 92.0; RU9: 1.0; RU10: 4.0; RU11: 1.0; RU12: 1.0; RU13: 1.0; RU25: 0.0; | RU2: 1.0; RU8: 88.0; RU9: 0.0; RU10: 3.0; RU11: 5.0; RU12: 3.0; RU13: 0.0; RU25: 0.0; | RU2: 1.0; RU8: 93.0; RU9: 0.0; RU10: 3.0; RU11: 0.0; RU12: 2.0; RU13: 0.0; RU25: 1.0; |
| 267872 | chr2:171627336-171627437 | 0 | RU1: 0.0; RU2: 1.0; RU4: 1.0; RU5: 0.0; RU6: 0.0; RU7: 90.0; RU8: 6.0; RU9: 2.0; | RU1: 2.0; RU2: 1.0; RU4: 1.0; RU5: 0.0; RU6: 0.0; RU7: 86.7; RU8: 9.2; RU9: 0.0; | RU1: 1.0; RU2: 0.0; RU4: 1.0; RU5: 2.0; RU6: 1.0; RU7: 86.0; RU8: 8.0; RU9: 1.0; |
| 202340 | chr17:73500175-73500301 | 1 | RU1: 10.2; RU2: 12.2; RU3: 40.8; RU4: 36.7; | RU1: 11.2; RU2: 13.3; RU3: 44.9; RU4: 30.6; | RU1: 16.7; RU2: 15.6; RU3: 19.8; RU4: 47.9; |
| 505502 | chr9:39357061-39357134 | 0 | RU4: 100.0; | RU4: 100.0; | RU4: 100.0; |
| 235208 | chr19:51172203-51172246 | 0 | RU1: 0.0; RU3: 85.0; RU4: 1.0; RU5: 5.0; RU6: 5.0; RU7: 2.0; RU8: 2.0; | RU1: 0.0; RU3: 82.0; RU4: 0.0; RU5: 5.0; RU6: 8.0; RU7: 0.0; RU8: 5.0; | RU1: 1.0; RU3: 84.0; RU4: 0.0; RU5: 2.0; RU6: 8.0; RU7: 3.0; RU8: 2.0; |
| 71394 | chr11:8662060-8662124 | 0 | RU3: 77.0; RU4: 9.0; RU5: 14.0; | RU3: 72.0; RU4: 12.0; RU5: 16.0; | RU3: 74.0; RU4: 12.0; RU5: 14.0; |
| 423705 | chr6:82461722-82461800 | 1 | RU3: 2.0; RU4: 16.0; RU5: 15.0; RU6: 53.0; RU7: 14.0; RU8: 0.0; | RU3: 0.0; RU4: 15.0; RU5: 30.0; RU6: 47.0; RU7: 8.0; RU8: 0.0; | RU3: 1.0; RU4: 26.0; RU5: 19.0; RU6: 49.0; RU7: 4.0; RU8: 1.0; |
| 464702 | chr7:128587344-128587435 | 1 | RU4: 51.0; RU6: 49.0; RU8: 0.0; | RU4: 45.0; RU6: 54.0; RU8: 1.0; | RU4: 55.0; RU6: 45.0; RU8: 0.0; |
| 448370 | chr7:45614158-45614240 | 0 | RU1: 2.0; RU3: 1.0; RU4: 10.0; RU5: 3.0; RU7: 83.0; RU8: 1.0; RU9: 0.0; | RU1: 0.0; RU3: 0.0; RU4: 14.0; RU5: 3.0; RU7: 80.0; RU8: 2.0; RU9: 1.0; | RU1: 0.0; RU3: 0.0; RU4: 8.0; RU5: 3.0; RU7: 86.0; RU8: 2.0; RU9: 1.0; |
| 522136 | chr9:140918170-140918247 | 1 | RU1: 0.0; RU4: 68.0; RU5: 32.0; RU6: 0.0; | RU1: 0.0; RU4: 58.0; RU5: 41.0; RU6: 1.0; | RU1: 1.0; RU4: 15.0; RU5: 84.0; RU6: 0.0; |
| 473020 | chr8:1949611-1949725 | 0 | RU1: 0.0; RU3: 20.0; RU6: 80.0; | RU1: 2.0; RU3: 22.0; RU6: 76.0; | RU1: 3.0; RU3: 22.0; RU6: 75.0; |
| 273259 | chr2:204305962-204306053 | 0 | RU2: 0.0; RU4: 0.0; RU6: 89.0; RU7: 4.0; RU8: 3.0; RU9: 4.0; | RU2: 0.0; RU4: 0.0; RU6: 89.0; RU7: 7.0; RU8: 3.0; RU9: 1.0; | RU2: 1.0; RU4: 1.0; RU6: 84.0; RU7: 7.0; RU8: 5.0; RU9: 2.0; |
| 403801 | chr5:150036299-150036365 | 1 | RU1: 0.0; RU3: 0.0; RU4: 2.0; RU5: 1.0; RU6: 1.0; RU7: 2.0; RU8: 0.0; RU9: 7.0; RU10: 4.0; RU11: 57.0; RU12: 11.0; RU13: 5.0; RU14: 9.0; RU15: 1.0; RU16: 0.0; RU17: 0.0; | RU1: 1.0; RU3: 1.0; RU4: 0.0; RU5: 0.0; RU6: 1.0; RU7: 1.0; RU8: 3.0; RU9: 19.0; RU10: 0.0; RU11: 55.0; RU12: 4.0; RU13: 8.0; RU14: 6.0; RU15: 1.0; RU16: 0.0; RU17: 0.0; | RU1: 0.0; RU3: 0.0; RU4: 1.0; RU5: 1.0; RU6: 2.0; RU7: 5.0; RU8: 1.0; RU9: 2.0; RU10: 0.0; RU11: 70.0; RU12: 5.0; RU13: 9.0; RU14: 2.0; RU15: 0.0; RU16: 1.0; RU17: 1.0; |
| 415781 | chr6:33287880-33287953 | 0 | RU4: 61.0; RU8: 39.0; | RU4: 60.0; RU8: 40.0; | RU4: 64.0; RU8: 36.0; |
| 522356 | chrX:299253-299371 | 1 | RU1: 2.0; RU2: 3.0; RU3: 7.0; RU4: 1.0; RU5: 1.0; RU6: 17.0; RU7: 52.0; RU8: 17.0; | RU1: 2.0; RU2: 3.0; RU3: 0.0; RU4: 6.0; RU5: 0.0; RU6: 50.0; RU7: 25.0; RU8: 14.0; | RU1: 2.0; RU2: 1.0; RU3: 1.0; RU4: 8.0; RU5: 0.0; RU6: 38.0; RU7: 48.0; RU8: 2.0; |
| 456826 | chr7:82582982-82583054 | 0 | RU2: 0.0; RU4: 83.0; RU5: 12.0; RU6: 5.0; RU8: 0.0; | RU2: 0.0; RU4: 83.0; RU5: 12.0; RU6: 3.0; RU8: 2.0; | RU2: 1.0; RU4: 83.0; RU5: 14.0; RU6: 2.0; RU8: 0.0; |
| 137350 | chr14:23352464-23352516 | 1 | RU7: 0.0; RU8: 9.0; RU9: 91.0; | RU7: 3.0; RU8: 0.0; RU9: 97.0; | RU7: 10.0; RU8: 14.0; RU9: 76.0; |
| 163521 | chr15:83349173-83349249 | 0 | RU2: 2.0; RU3: 0.0; RU6: 94.0; RU7: 2.0; RU8: 2.0; | RU2: 0.0; RU3: 0.0; RU6: 93.0; RU7: 4.0; RU8: 3.0; | RU2: 0.0; RU3: 1.0; RU6: 96.0; RU7: 0.0; RU8: 3.0; |
| 227500 | chr19:21587890-21587932 | 0 | RU3: 100.0; | RU3: 100.0; | RU3: 100.0; |
| 268535 | chr2:175292580-175292623 | 1 | RU2: 5.0; RU3: 95.0; | RU2: 18.0; RU3: 82.0; | RU2: 34.0; RU3: 66.0; |
| 162124 | chr15:75499185-75499229 | 1 | RU6: 83.0; RU7: 1.0; RU8: 2.0; RU9: 6.0; RU10: 6.0; RU11: 2.0; | RU6: 85.0; RU7: 0.0; RU8: 2.0; RU9: 3.0; RU10: 9.0; RU11: 1.0; | RU6: 73.0; RU7: 1.0; RU8: 0.0; RU9: 12.0; RU10: 11.0; RU11: 3.0; |
| 162128 | chr15:75500552-75500660 | 0 | RU1: 1.0; RU3: 0.0; RU5: 0.0; RU6: 2.0; RU9: 0.0; RU11: 1.0; RU12: 1.0; RU14: 0.0; RU15: 3.0; RU18: 90.0; RU19: 2.0; | RU1: 0.0; RU3: 1.0; RU5: 1.0; RU6: 0.0; RU9: 0.0; RU11: 0.0; RU12: 4.0; RU14: 2.0; RU15: 0.0; RU18: 92.0; RU19: 0.0; | RU1: 2.0; RU3: 1.0; RU5: 1.0; RU6: 1.0; RU9: 1.0; RU11: 2.0; RU12: 1.0; RU14: 1.0; RU15: 3.0; RU18: 86.0; RU19: 1.0; |
| 178623 | chr16:54319062-54319174 | 0 | RU5: 72.0; RU7: 28.0; | RU5: 77.0; RU7: 23.0; | RU5: 77.6; RU7: 22.4; |
| 301645 | chr21:45196323-45196359 | 1 | RU2: 31.0; RU3: 68.0; RU4: 1.0; | RU2: 76.0; RU3: 24.0; RU4: 0.0; | RU2: 27.0; RU3: 72.0; RU4: 1.0; |
| 440910 | chr7:2552850-2552914 | 0 | RU5: 0.0; RU7: 1.0; RU8: 55.0; RU9: 44.0; | RU5: 0.0; RU7: 0.0; RU8: 58.0; RU9: 42.0; | RU5: 1.0; RU7: 0.0; RU8: 63.0; RU9: 36.0; |
| 47742 | chr10:21805466-21805519 | 1 | RU3: 14.0; RU4: 85.0; RU8: 1.0; | RU3: 64.0; RU4: 36.0; RU8: 0.0; | RU3: 47.0; RU4: 53.0; RU8: 0.0; |
| 319929 | chr3:47043574-47043643 | 0 | RU1: 0.0; RU2: 0.0; RU3: 1.0; RU8: 99.0; | RU1: 2.0; RU2: 1.0; RU3: 1.0; RU8: 96.0; | RU1: 0.0; RU2: 0.0; RU3: 0.0; RU8: 100.0; |
| 212779 | chr18:48723610-48723722 | 0 | RU1: 1.0; RU2: 19.0; RU3: 4.0; RU4: 1.0; RU6: 0.0; RU7: 75.0; RU8: 0.0; | RU1: 3.0; RU2: 21.0; RU3: 1.0; RU4: 0.0; RU6: 0.0; RU7: 74.0; RU8: 1.0; | RU1: 1.0; RU2: 16.0; RU3: 2.0; RU4: 1.0; RU6: 1.0; RU7: 77.0; RU8: 2.0; |
| 529568 | chrX:24329868-24329952 | 1 | RU3: 1.0; RU11: 1.0; RU12: 2.0; RU13: 2.0; RU14: 80.0; RU15: 14.0; RU17: 0.0; RU18: 0.0; | RU3: 0.0; RU11: 0.0; RU12: 2.0; RU13: 4.0; RU14: 92.0; RU15: 0.0; RU17: 2.0; RU18: 0.0; | RU3: 0.0; RU11: 0.0; RU12: 0.0; RU13: 0.0; RU14: 99.0; RU15: 0.0; RU17: 0.0; RU18: 1.0; |
| 80681 | chr11:64603844-64603902 | 1 | RU6: 59.0; RU7: 41.0; | RU6: 98.0; RU7: 2.0; | RU6: 38.0; RU7: 62.0; |
| 23374 | chr1:144827824-144827908 | 1 | RU1: 8.5; RU2: 4.3; RU3: 2.1; RU4: 85.1; | RU1: 3.1; RU2: 3.1; RU3: 4.1; RU4: 89.8; | RU1: 1.0; RU2: 1.0; RU3: 0.0; RU4: 98.0; |
| 539526 | chrX:84363608-84363698 | 0 | RU1: 0.0; RU2: 0.0; RU4: 1.0; RU5: 2.0; RU6: 96.0; RU8: 1.0; RU9: 0.0; | RU1: 2.0; RU2: 0.0; RU4: 0.0; RU5: 0.0; RU6: 98.0; RU8: 0.0; RU9: 0.0; | RU1: 0.0; RU2: 1.0; RU4: 0.0; RU5: 0.0; RU6: 97.0; RU8: 1.0; RU9: 1.0; |
| 23441 | chr1:145320515-145320599 | 0 | RU1: 3.0; RU2: 3.0; RU4: 94.0; | RU1: 2.0; RU2: 4.0; RU4: 94.0; | RU1: 0.0; RU2: 6.0; RU4: 94.0; |
| 23456 | chr1:145334688-145334772 | 0 | RU1: 3.0; RU2: 10.0; RU4: 87.0; | RU1: 1.0; RU2: 5.1; RU4: 93.9; | RU1: 1.0; RU2: 9.0; RU4: 90.0; |
| 23462 | chr1:145344132-145344216 | 0 | RU1: 4.0; RU2: 5.0; RU4: 91.0; | RU1: 4.0; RU2: 9.0; RU4: 87.0; | RU1: 2.0; RU2: 3.0; RU4: 95.0; |
| 23465 | chr1:145348856-145348940 | 1 | RU1: 3.2; RU2: 7.4; RU3: 3.2; RU4: 86.2; | RU1: 1.0; RU2: 1.0; RU3: 0.0; RU4: 98.0; | RU1: 1.0; RU2: 7.0; RU3: 2.0; RU4: 90.0; |
| 23473 | chr1:145358308-145358392 | 0 | RU1: 5.3; RU2: 3.2; RU3: 4.3; RU4: 87.2; | RU1: 3.1; RU2: 2.1; RU3: 0.0; RU4: 94.8; | RU1: 2.0; RU2: 5.1; RU3: 0.0; RU4: 92.9; |
| 162748 | chr15:79060365-79060485 | 1 | RU2: 3.2; RU3: 6.4; RU4: 5.3; RU5: 29.8; RU6: 50.0; RU7: 5.3; | RU2: 5.2; RU3: 9.4; RU4: 5.2; RU5: 30.2; RU6: 47.9; RU7: 2.1; | RU2: 5.6; RU3: 4.4; RU4: 6.7; RU5: 48.9; RU6: 33.3; RU7: 1.1; |
| 302080 | chr21:45970748-45970853 | 1 | RU1: 1.0; RU2: 0.0; RU4: 0.0; RU6: 10.0; RU7: 84.0; RU8: 1.0; RU9: 4.0; RU10: 0.0; RU11: 0.0; | RU1: 3.0; RU2: 2.0; RU4: 1.0; RU6: 30.0; RU7: 58.0; RU8: 2.0; RU9: 0.0; RU10: 3.0; RU11: 1.0; | RU1: 0.0; RU2: 0.0; RU4: 1.0; RU6: 15.0; RU7: 79.0; RU8: 2.0; RU9: 1.0; RU10: 2.0; RU11: 0.0; |
| 220161 | chr19:1469448-1469583 | 0 | RU1: 0.0; RU3: 1.0; RU4: 1.0; RU5: 2.0; RU6: 96.0; RU7: 0.0; | RU1: 1.0; RU3: 0.0; RU4: 1.0; RU5: 0.0; RU6: 98.0; RU7: 0.0; | RU1: 0.0; RU3: 0.0; RU4: 1.0; RU5: 0.0; RU6: 98.0; RU7: 1.0; |
| 302084 | chr21:45978046-45978148 | 0 | RU1: 0.0; RU2: 18.0; RU3: 0.0; RU5: 82.0; | RU1: 2.0; RU2: 12.0; RU3: 1.0; RU5: 85.0; | RU1: 0.0; RU2: 11.0; RU3: 0.0; RU5: 89.0; |
| 302092 | chr21:45994328-45994425 | 0 | RU1: 3.0; RU2: 1.0; RU3: 20.0; RU4: 1.0; RU5: 1.0; RU6: 70.0; RU7: 4.0; RU8: 0.0; RU10: 0.0; | RU1: 2.0; RU2: 0.0; RU3: 22.0; RU4: 2.0; RU5: 0.0; RU6: 70.0; RU7: 0.0; RU8: 3.0; RU10: 1.0; | RU1: 1.0; RU2: 0.0; RU3: 24.0; RU4: 3.0; RU5: 0.0; RU6: 69.0; RU7: 1.0; RU8: 2.0; RU10: 0.0; |
| 302108 | chr21:46020638-46020683 | 0 | RU1: 1.0; RU2: 28.0; RU3: 71.0; | RU1: 0.0; RU2: 33.0; RU3: 67.0; | RU1: 0.0; RU2: 29.0; RU3: 71.0; |
| 302129 | chr21:46057612-46057689 | 1 | RU1: 1.0; RU2: 0.0; RU3: 2.0; RU4: 62.0; RU5: 35.0; RU8: 0.0; | RU1: 1.0; RU2: 0.0; RU3: 1.0; RU4: 37.0; RU5: 60.0; RU8: 1.0; | RU1: 1.0; RU2: 1.0; RU3: 1.0; RU4: 59.0; RU5: 38.0; RU8: 0.0; |
| 302133 | chr21:46066668-46066792 | 0 | RU1: 5.1; RU2: 7.1; RU3: 2.0; RU4: 1.0; RU5: 6.1; RU6: 1.0; RU8: 77.6; RU9: 0.0; | RU1: 6.0; RU2: 4.0; RU3: 2.0; RU4: 0.0; RU5: 5.0; RU6: 0.0; RU8: 80.0; RU9: 3.0; | RU1: 4.0; RU2: 2.0; RU3: 1.0; RU4: 0.0; RU5: 8.0; RU6: 1.0; RU8: 81.0; RU9: 3.0; |
| 155487 | chr15:34331100-34331196 | 1 | RU1: 1.0; RU3: 0.0; RU5: 0.0; RU7: 3.0; RU8: 79.0; RU9: 15.0; RU12: 2.0; | RU1: 1.0; RU3: 0.0; RU5: 1.0; RU7: 0.0; RU8: 97.0; RU9: 0.0; RU12: 1.0; | RU1: 0.0; RU3: 1.0; RU5: 0.0; RU7: 27.0; RU8: 70.0; RU9: 0.0; RU12: 2.0; |
| 498787 | chr8:144511953-144512027 | 0 | RU4: 63.0; RU8: 34.0; RU9: 3.0; | RU4: 57.0; RU8: 42.0; RU9: 1.0; | RU4: 57.0; RU8: 42.0; RU9: 1.0; |
| 23662 | chr1:146450870-146450954 | 0 | RU1: 26.5; RU2: 5.1; RU3: 1.0; RU4: 67.3; | RU1: 31.5; RU2: 4.3; RU3: 0.0; RU4: 64.1; | RU1: 33.3; RU2: 8.3; RU3: 0.0; RU4: 58.3; |
| 23674 | chr1:146460390-146460474 | 0 | RU1: 31.2; RU2: 7.3; RU3: 1.0; RU4: 60.4; | RU1: 27.1; RU2: 10.4; RU3: 3.1; RU4: 59.4; | RU1: 31.2; RU2: 16.7; RU3: 1.0; RU4: 51.0; |
| 236719 | chr19:55743511-55743600 | 0 | RU5: 42.0; RU9: 1.0; RU10: 57.0; RU14: 0.0; | RU5: 39.0; RU9: 0.0; RU10: 61.0; RU14: 0.0; | RU5: 38.0; RU9: 0.0; RU10: 61.0; RU14: 1.0; |
| 7380 | chr1:26608801-26608909 | 1 | RU2: 15.0; RU3: 4.0; RU4: 31.0; RU5: 43.0; RU6: 2.0; RU7: 2.0; RU8: 3.0; | RU2: 5.1; RU3: 7.1; RU4: 14.3; RU5: 39.8; RU6: 3.1; RU7: 4.1; RU8: 26.5; | RU2: 26.0; RU3: 0.0; RU4: 11.0; RU5: 59.0; RU6: 1.0; RU7: 0.0; RU8: 3.0; |
| 498969 | chr8:145095669-145095693 | 0 | RU2: 86.0; RU3: 1.0; RU4: 8.0; RU5: 5.0; RU6: 0.0; RU7: 0.0; | RU2: 86.0; RU3: 0.0; RU4: 7.0; RU5: 5.0; RU6: 1.0; RU7: 1.0; | RU2: 84.0; RU3: 0.0; RU4: 8.0; RU5: 5.0; RU6: 3.0; RU7: 0.0; |
| 220483 | chr19:2113345-2113383 | 0 | RU1: 0.0; RU6: 94.0; RU7: 1.0; RU8: 1.0; RU9: 1.0; RU10: 3.0; RU11: 0.0; RU12: 0.0; RU13: 0.0; | RU1: 0.0; RU6: 90.0; RU7: 0.0; RU8: 1.0; RU9: 4.0; RU10: 3.0; RU11: 0.0; RU12: 1.0; RU13: 1.0; | RU1: 1.0; RU6: 89.0; RU7: 0.0; RU8: 2.0; RU9: 4.0; RU10: 3.0; RU11: 1.0; RU12: 0.0; RU13: 0.0; |
| 408978 | chr5:179528972-179529084 | 1 | RU1: 0.0; RU2: 100.0; | RU1: 0.0; RU2: 100.0; | RU1: 16.0; RU2: 84.0; |
| 312561 | chr22:50751962-50752067 | 0 | RU3: 1.0; RU4: 1.0; RU5: 0.0; RU7: 97.0; RU8: 1.0; | RU3: 1.0; RU4: 0.0; RU5: 1.0; RU7: 96.9; RU8: 1.0; | RU3: 0.0; RU4: 2.0; RU5: 0.0; RU7: 98.0; RU8: 0.0; |
| 278010 | chr2:231902477-231902581 | 1 | RU6: 2.0; RU7: 0.0; RU8: 2.0; RU9: 1.0; RU10: 1.0; RU13: 86.7; RU14: 6.1; RU15: 1.0; | RU6: 0.0; RU7: 1.0; RU8: 0.0; RU9: 1.0; RU10: 1.0; RU13: 97.0; RU14: 0.0; RU15: 0.0; | RU6: 0.0; RU7: 0.0; RU8: 0.0; RU9: 1.0; RU10: 0.0; RU13: 99.0; RU14: 0.0; RU15: 0.0; |
| 261641 | chr2:131129928-131129972 | 1 | RU6: 65.0; RU7: 35.0; | RU6: 33.0; RU7: 67.0; | RU6: 25.0; RU7: 75.0; |
| 114187 | chr12:119594416-119594521 | 0 | RU1: 0.0; RU2: 25.0; RU3: 21.0; RU6: 1.0; RU8: 3.0; RU16: 50.0; | RU1: 1.0; RU2: 31.0; RU3: 17.0; RU6: 0.0; RU8: 1.0; RU16: 50.0; | RU1: 0.0; RU2: 28.0; RU3: 20.0; RU6: 1.0; RU8: 1.0; RU16: 50.0; |
| 417354 | chr6:42074423-42074485 | 0 | RU3: 78.0; RU4: 6.0; RU5: 16.0; | RU3: 73.0; RU4: 5.0; RU5: 22.0; | RU3: 70.0; RU4: 6.0; RU5: 24.0; |
| 236761 | chr19:55820096-55820223 | 1 | RU2: 1.0; RU3: 4.2; RU4: 2.1; RU5: 14.6; RU6: 0.0; RU7: 44.8; RU8: 15.6; RU9: 14.6; RU10: 3.1; | RU2: 0.0; RU3: 0.0; RU4: 6.4; RU5: 0.0; RU6: 2.1; RU7: 22.3; RU8: 69.1; RU9: 0.0; RU10: 0.0; | RU2: 0.0; RU3: 2.1; RU4: 2.1; RU5: 14.6; RU6: 3.1; RU7: 30.2; RU8: 46.9; RU9: 1.0; RU10: 0.0; |
| 433773 | chr6:148664227-148664304 | 0 | RU4: 0.0; RU7: 0.0; RU10: 1.0; RU13: 97.0; RU14: 2.0; | RU4: 1.0; RU7: 1.0; RU10: 0.0; RU13: 87.0; RU14: 11.0; | RU4: 0.0; RU7: 0.0; RU10: 0.0; RU13: 88.0; RU14: 12.0; |
| 97926 | chr12:26275214-26275304 | 0 | RU1: 32.0; RU2: 1.0; RU3: 0.0; RU4: 0.0; RU5: 0.0; RU6: 0.0; RU10: 67.0; RU11: 0.0; | RU1: 28.0; RU2: 0.0; RU3: 1.0; RU4: 1.0; RU5: 1.0; RU6: 2.0; RU10: 67.0; RU11: 0.0; | RU1: 24.0; RU2: 0.0; RU3: 0.0; RU4: 0.0; RU5: 0.0; RU6: 0.0; RU10: 75.0; RU11: 1.0; |
| 204494 | chr17:79954663-79954723 | 0 | RU4: 44.0; RU5: 0.0; RU10: 56.0; | RU4: 41.0; RU5: 1.0; RU10: 58.0; | RU4: 36.0; RU5: 0.0; RU10: 64.0; |
| 270043 | chr2:185803430-185803482 | 0 | RU1: 0.0; RU5: 1.0; RU6: 1.0; RU9: 98.0; | RU1: 0.0; RU5: 0.0; RU6: 1.0; RU9: 99.0; | RU1: 1.0; RU5: 0.0; RU6: 0.0; RU9: 99.0; |
| 417536 | chr6:42989413-42989462 | 1 | RU5: 0.0; RU7: 70.0; RU8: 30.0; | RU5: 5.0; RU7: 19.0; RU8: 76.0; | RU5: 1.0; RU7: 13.0; RU8: 86.0; |
| 253768 | chr2:85981782-85981873 | 0 | RU1: 0.0; RU5: 100.0; RU7: 0.0; | RU1: 0.0; RU5: 99.0; RU7: 1.0; | RU1: 1.0; RU5: 98.0; RU7: 1.0; |
| 386363 | chr5:37036435-37036482 | 0 | RU4: 95.0; RU5: 4.0; RU12: 1.0; | RU4: 97.0; RU5: 0.0; RU12: 3.0; | RU4: 97.0; RU5: 0.0; RU12: 3.0; |
| 393063 | chr5:79950699-79950773 | 1 | RU2: 1.0; RU3: 0.0; RU5: 35.0; RU6: 0.0; RU7: 5.0; RU8: 43.0; RU9: 6.0; RU10: 3.0; RU11: 5.0; RU12: 2.0; | RU2: 0.0; RU3: 0.0; RU5: 9.0; RU6: 1.0; RU7: 0.0; RU8: 66.0; RU9: 24.0; RU10: 0.0; RU11: 0.0; RU12: 0.0; | RU2: 0.0; RU3: 1.0; RU5: 30.0; RU6: 0.0; RU7: 2.0; RU8: 56.0; RU9: 6.0; RU10: 4.0; RU11: 1.0; RU12: 0.0; |
| 8048 | chr1:29475356-29475440 | 1 | RU1: 20.0; RU2: 10.0; RU3: 1.0; RU4: 1.0; RU7: 68.0; RU8: 0.0; RU9: 0.0; | RU1: 27.0; RU2: 10.0; RU3: 1.0; RU4: 0.0; RU7: 60.0; RU8: 1.0; RU9: 1.0; | RU1: 25.0; RU2: 17.0; RU3: 2.0; RU4: 1.0; RU7: 55.0; RU8: 0.0; RU9: 0.0; |
| 278405 | chr2:233712209-233712281 | 0 | RU2: 0.0; RU3: 100.0; | RU2: 0.0; RU3: 100.0; | RU2: 1.0; RU3: 99.0; |
| 499626 | chr9:2039754-2039868 | 0 | RU2: 0.0; RU7: 0.0; RU8: 92.0; RU9: 7.0; RU10: 1.0; | RU2: 1.0; RU7: 0.0; RU8: 98.0; RU9: 1.0; RU10: 0.0; | RU2: 0.0; RU7: 1.0; RU8: 97.0; RU9: 2.0; RU10: 0.0; |
| 303036 | chr21:47565632-47565734 | 1 | RU1: 9.2; RU2: 9.2; RU3: 27.6; RU4: 43.4; RU5: 10.5; | RU1: 10.0; RU2: 15.0; RU3: 17.5; RU4: 42.5; RU5: 15.0; | RU1: 8.0; RU2: 23.9; RU3: 21.6; RU4: 42.0; RU5: 4.5; |
